# Supplementary material for: Dearomative pyrrole (3+2) reaction with geminal bromonitroalkane: synthesis of 2,3-dihydropyrroles
Source: Royal Society of Chemistry journal article supplement (doi:10.1039/d4cc01437e), 2024-01-01

## Supporting Information

### **Dearomative Pyrrole (3 + 2) Reaction with Geminal**

### **Bromonitroalkane: Synthesis of 2,3-Dihydropyrroles**

Lin Shi, Lidong Liu, Xingyu Lei, Yihan Wang, Yeguang Fang\* and Peng Jiao\*

College of Chemistry, Beijing Normal University, Beijing 100875, China

E-mail: [pjiao@bnu.edu.cn](mailto:pjiao@bnu.edu.cn); [fangyg2021@nanoctr.cn](mailto:fangyg2021@nanoctr.cn)

## Table of contents

|                                                        |     |
|--------------------------------------------------------|-----|
| 1. General information.....                            | S1  |
| 2. Optimization of reaction conditions .....           | S1  |
| 3. Preparation of pyrroles .....                       | S3  |
| 3.1 Preparation of pyrroles .....                      | S3  |
| 3.2 Physical data.....                                 | S5  |
| 4. Physical data of <i>gem</i> -bromonitroalkanes..... | S15 |
| 5. Cycloaddition reactions .....                       | S17 |
| 5.1 Typical procedure.....                             | S17 |
| 5.2 Physical data.....                                 | S17 |
| 6. Gram-scale reaction.....                            | S32 |
| 7. Conversions of <b>3aa</b> .....                     | S32 |
| 7.1 Conversions of <b>3aa</b> .....                    | S32 |
| 7.2 Physical data.....                                 | S34 |
| 8. Mechanism experiments .....                         | S37 |
| 8.1 Radical trapping experiment using TEMPO .....      | S37 |
| 8.2 Powder X-ray diffraction spectrum .....            | S38 |
| 9. DFT calculations .....                              | S38 |
| 10. Unsuccessful reactants.....                        | S39 |
| 11. Crystal data .....                                 | S40 |
| 12. References .....                                   | S45 |
| 13. NMR spectra.....                                   | S47 |

## 1. General information

All the solvents and reagents were obtained from commercial sources and used without purification unless stated otherwise. THF, Et<sub>2</sub>O and 1,4-dioxane were distilled over CaH<sub>2</sub> and LiAlH<sub>4</sub> under N<sub>2</sub> atmosphere. Toluene, CH<sub>2</sub>Cl<sub>2</sub> and CH<sub>3</sub>CN were distilled over CaH<sub>2</sub> under N<sub>2</sub>. Acetone, AcOEt, DMSO, DMA, DMF, DME, CHCl<sub>3</sub>, C<sub>2</sub>H<sub>5</sub>NO<sub>2</sub>, CH<sub>3</sub>NO<sub>2</sub> and DBU were dried over activated 4A molecular sieves. All glassware was dried overnight at 100 °C prior to use. Thin-layer chromatography (TLC) was performed on silica gel plates (0.2–0.25 mm thickness). Visualization of TLC was achieved by the use of UV light (254 nm). Flash column chromatography was performed on a silica gel (Qingdao Haiyang, 200–300 mesh) column. <sup>1</sup>H and <sup>13</sup>C NMR spectra were recorded on a JEOL ECZ 400 MHz or 600 MHz spectrometer. The chemical shift (δ) values are given in ppm and are referenced to TMS or residual solvent peaks. Chemical shifts of <sup>19</sup>F NMR are referred to CFC<sub>3</sub> (δ = 0). Infrared spectra were obtained on a Nicolet AVATAR 360 FT-IR spectrometer. Melting points were measured on a WRX-4 (Shanghai Yice) micro melting point apparatus. Mass spectra were obtained on an AB Sciex TripleTOF 5600+ mass spectrometer. X-ray diffraction experiment was performed on a Rigaku XtalLAB Synergy diffractometer using Cu Kα radiation. Visible light promoted reactions were conducted in a tube irradiated with blue light LEDs (456 nm, 15 W, approximately 3.0 cm distance from the tube). For reactions that require heating, a silicone oil bath was used.

## 2. Optimization of reaction conditions

**Table S1** Effect of base or Ag(I) salt.

**1a** + **2a**  $\xrightarrow[\text{MeCN, N}_2, \text{rt}]{\text{base or silver salt}}$  **(±)-3aa**

| Entry | Base or Ag salt                    | Yield (%) <sup>a</sup> | Entry | Base or Ag salt                 | Yield (%) <sup>a</sup> |
|-------|------------------------------------|------------------------|-------|---------------------------------|------------------------|
| 1     | Na <sub>2</sub> CO <sub>3</sub>    | trace                  | 14    |                                 | 50 <sup>b</sup>        |
| 2     | NaHCO <sub>3</sub>                 | 0                      | 15    |                                 | 0 <sup>c</sup>         |
| 3     | NaH <sub>2</sub> PO <sub>4</sub>   | 0                      | 16    | Ag <sub>2</sub> CO <sub>3</sub> | 75 <sup>d</sup>        |
| 4     | CH <sub>3</sub> CO <sub>2</sub> Na | 0                      | 17    |                                 | 0 <sup>e</sup>         |
| 5     | KF·2H <sub>2</sub> O               | 0                      | 18    | Cu(OH) <sub>2</sub>             | 0                      |
| 6     | Ag <sub>2</sub> O                  | 12                     | 19    | DABCO                           | 0                      |
| 7     | AgF                                | 31                     | 20    | DBU                             | 0                      |

|    |                                 |    |    |                         |                |
|----|---------------------------------|----|----|-------------------------|----------------|
| 8  | AgPF <sub>6</sub>               | 17 | 21 | Et <sub>3</sub> N       | 0              |
| 9  | Ag <sub>2</sub> SO <sub>4</sub> | 0  | 22 | DIPEA                   | 0              |
| 10 | AgOAc                           | 0  | 23 | 2,6-lutidine            | 0              |
| 11 | AgNO <sub>2</sub>               | 0  | 24 | pyridine                | 0              |
| 12 | AgNO <sub>3</sub>               | 0  | 25 | none                    | 0              |
| 13 | Ag <sub>2</sub> CO <sub>3</sub> | 0  | 26 | TBSCl/Et <sub>3</sub> N | 0 <sup>f</sup> |

<sup>a</sup> Isolated yield. <sup>b</sup> The mixture was irradiated with blue light LEDs (456 nm). <sup>c</sup> 10 mol % PPh<sub>3</sub> was added. <sup>d</sup> 10 mol % PPh<sub>3</sub> was added. The mixture was irradiated with blue light LEDs (456 nm). <sup>e</sup> 10 mol % (*R*)-BINAP was added. The mixture was irradiated with blue light LEDs (456 nm). <sup>f</sup> Reaction time: 7 days.

**Table S2** Effect of solvent.

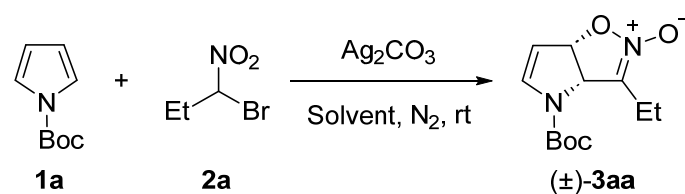

**1a** + **2a**  $\xrightarrow[\text{Solvent, N}_2, \text{rt}]{\text{Ag}_2\text{CO}_3}$  **(±)-3aa**

| Entry | Solvent           | Yield (%) <sup>a</sup> | Entry | Solvent  | Yield (%) <sup>a</sup> |
|-------|-------------------|------------------------|-------|----------|------------------------|
| 1     | THF               | 0                      | 9     | AcOEt    | 0                      |
| 2     | DME               | 0                      | 10    | Acetone  | 0                      |
| 3     | Et <sub>2</sub> O | 0                      | 11    | DMF      | 20                     |
| 4     | 1,4-Dioxane       | 12                     | 12    | DMA      | 33                     |
| 5     | Benzene           | 31                     | 13    | DMSO     | 80                     |
| 6     | Toluene           | 17                     | 14    | Methanol | 0                      |
| 7     | DCM               | 0                      | 15    | Ethanol  | 0                      |
| 8     | Chloroform        | 0                      |       |          |                        |

<sup>a</sup> Isolated yield.

**Table S3** Effect of the molar ratio.

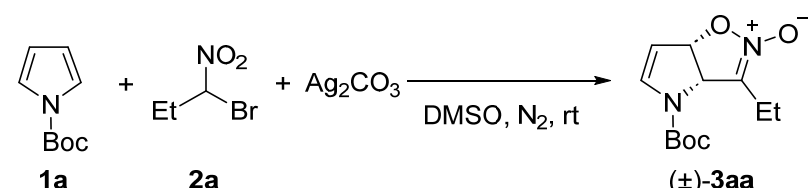

**1a** + **2a** + Ag<sub>2</sub>CO<sub>3</sub>  $\xrightarrow[\text{DMSO, N}_2, \text{rt}]{} \text{Boc-protected pyrrole with ethyl and nitro groups}$  **(±)-3aa**

| <b>1a : 2a : Ag<sub>2</sub>CO<sub>3</sub></b> | Yield (%) <sup>a</sup> | <b>1a : 2a : Ag<sub>2</sub>CO<sub>3</sub></b> | Yield (%) <sup>a</sup> |
|-----------------------------------------------|------------------------|-----------------------------------------------|------------------------|
| 1.0 : 1.0 : 2.0                               | 31                     | 1.0 : 2.0 : 1.0                               | 63                     |
| 1.0 : 2.0 : 2.0                               | 80                     | 1.0 : 2.0 : 1.5                               | 75                     |
| 1.0 : 3.0 : 2.0                               | 78                     | 1.0 : 2.0 : 3.0                               | 82                     |

<sup>a</sup> Isolated yield.

### 3. Preparation of pyrroles

#### 3.1 Preparation of pyrroles

##### General procedure A<sup>[1]</sup>

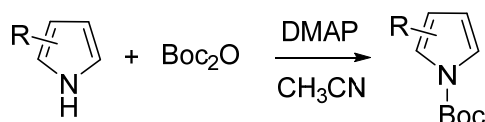

$\text{Boc}_2\text{O}$  (1.4 mL, 6.0 mmol) and 4-dimethylaminopyridine (61 mg, 0.5 mmol) were added to a solution of pyrrole (5.0 mmol) in acetonitrile. The solution was stirred at rt overnight, diluted with  $\text{Et}_2\text{O}$ , washed with  $\text{NaHCO}_3$  and brine. The organic layer was dried over  $\text{Na}_2\text{SO}_4$  and concentrated under reduced pressure. The residue was purified by flash chromatography on silica gel to give the corresponding product.

##### General procedure B<sup>[2]</sup>

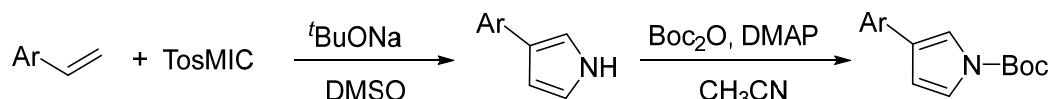

To a suspension of  $t\text{BuONa}$  (384 mg, 4.0 mmol) in dry DMSO (10 mL) at room temperature was added a solution of arylalkene (2.0 mmol) and tosylmethyl isocyanate (508 mg, 2.6 mmol) in DMSO (10 mL) via cannular. The beige solution was stirred at room temperature for 2 h whereupon it was diluted with  $\text{EtOAc}$  (50 mL) and brine (50 mL). The aqueous layer was extracted with  $\text{EtOAc}$  ( $3 \times 50$  mL). The combined organic layers were dried over  $\text{Na}_2\text{SO}_4$ , and concentrated in vacuo. The residue was purified by flash chromatography on silica gel to give the 3-arylpyrrole. *N*-Boc-3-arylpyrrole was synthesized according to General procedure A.

##### General procedure C<sup>[3]</sup>

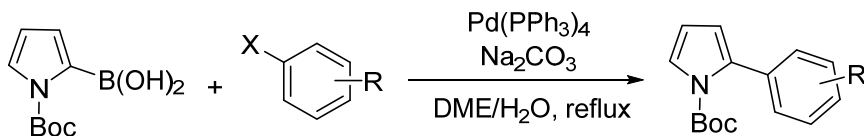

To a stirred solution of the appropriate aryl iodide or bromide (3.6 mmol), *N*-Boc-pyrrole-2-boronic acid (1.06 g, 5.0 mmol) and *tetrakis*-(triphenylphosphine)palladium (0.21 g, 0.18 mmol) in 1,2-dimethoxyethane (20 mL) at room temperature under argon was added a solution of sodium carbonate (1.6 g, 15 mmol) in water (8 mL). The mixture was heated at reflux for 4 h, cooled, then partitioned

between water (50 mL) and dichloromethane (4 × 20 mL). The combined extracts were dried over Na<sub>2</sub>SO<sub>4</sub> and evaporated in vacuo to give an oil. The residue was purified by flash chromatography on silica gel to give the *N*-Boc-2-arylpyrrole.

**General procedure D<sup>[4]</sup>**

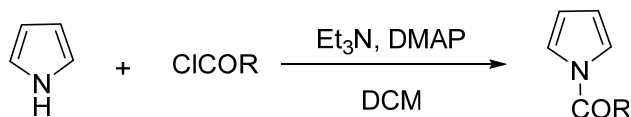

Triethylamine (1.0 mL, 7.5 mmol) was added to a stirred solution of pyrrole (0.4 mL, 5.0 mmol) and chloroformate, acyl chloride or sulfonyl chloride (7.5 mmol) in dry DCM at 0 °C. DMAP (61 mg, 0.5 mmol) was added to the mixture. After stirring the reaction mixture at room temperature for 5 min, the reaction was completed. Water was added to the mixture. The aqueous layer was extracted with 3 portions of EtOAc. The combined organic layers were dried over Na<sub>2</sub>SO<sub>4</sub>, and concentrated under reduced pressure. The crude material was purified by flash column chromatography on silica gel to give the corresponding product.

**General procedure E<sup>[5]</sup>**

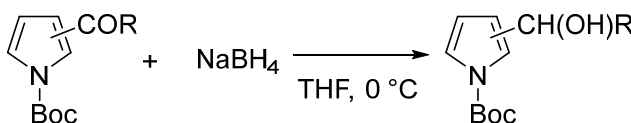

To a solution of acyl-substituted pyrrole (10 mmol) in 30 mL THF at 0 °C, NaBH<sub>4</sub> (379 mg, 10 mmol) was added in portions, and the mixture was stirred for 1.5 h at 0 °C. The reaction mixture was supplemented with 100 mL Et<sub>2</sub>O, poured onto 50 mL ice water and extracted with Et<sub>2</sub>O (3 × 100 mL). The combined organic phase was washed with brine (3 × 50 mL), dried over Na<sub>2</sub>SO<sub>4</sub>, and concentrated under reduced pressure. The crude material was purified by silica gel column chromatography to give the corresponding product.

**General procedure F**

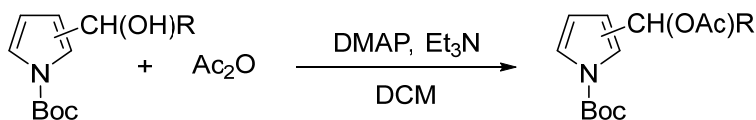

The hydroxyalkyl-substituted pyrrole (10 mmol) and Ac<sub>2</sub>O (0.95 mL, 10 mmol) in CH<sub>2</sub>Cl<sub>2</sub> (30 mL) were treated with Et<sub>3</sub>N (2 mL, 10 mmol) and DMAP (122 mg, 1 mmol), and the mixture was stirred at rt overnight. The mixture was diluted with CH<sub>2</sub>Cl<sub>2</sub>. The organic layer was washed with brine (3 × 50 mL), dried over Na<sub>2</sub>SO<sub>4</sub> and concentrated under reduced pressure. The crude material was purified by silica gel chromatography to give the corresponding product.

## 3.2 Physical data

### Phenylmethyl-1*H*-pyrrole-1-carboxylate (**1b**)<sup>[6]</sup>

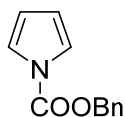

#### General procedure D

Clear oil (0.9 g, 90% yield); <sup>1</sup>H NMR (400 MHz, Chloroform-*d*) δ 7.96 – 7.05 (m, 7H), 6.33 (d, *J* = 2.5 Hz, 2H), 5.43 (d, *J* = 3.1 Hz, 2H) ppm; <sup>13</sup>C NMR (151 MHz, Chloroform-*d*) δ 150.1, 134.8, 134.8, 128.5, 128.2, 120.0, 112.4, 68.7 ppm.

### 2,2-Dimethyl-1-(1*H*-pyrrol-1-yl)-1-propanone (**1c**)<sup>[7]</sup>

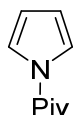

#### General procedure D

Clear oil (0.7 g, 97% yield); <sup>1</sup>H NMR (400 MHz, Chloroform-*d*) δ 7.27 (t, *J* = 2.4 Hz, 2H), 6.08 (t, *J* = 2.4 Hz, 2H), 1.29 (s, 9H) ppm; <sup>13</sup>C NMR (151 MHz, Chloroform-*d*) δ 175.8, 120.5, 111.8, 40.5, 28.4 ppm.

### Phenyl-*H*-pyrrole-1-ylmethanone (**1d**)<sup>[8]</sup>

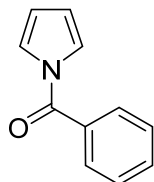

#### General procedure D

White solid (0.7 g, 80% yield); <sup>1</sup>H NMR (600 MHz, Chloroform-*d*) δ 7.78 – 7.70 (m, 2H), 7.59 (t, *J* = 7.5 Hz, 1H), 7.50 (t, *J* = 7.6 Hz, 2H), 7.32 – 7.28 (m, 2H), 6.35 (t, *J* = 2.3 Hz, 2H) ppm; <sup>13</sup>C NMR (151 MHz, Chloroform-*d*) δ 167.5, 133.1, 132.1, 129.3, 128.3, 121.1, 113.0 ppm.

### (4-Nitrophenyl)-1*H*-pyrrole-1-ylmethanone (**1e**)<sup>[9]</sup>

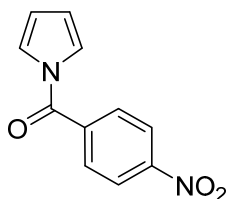

#### General procedure D

White solid (0.8 g, 75% yield);  $^1\text{H}$  NMR (600 MHz, Chloroform-*d*)  $\delta$  8.37 (d,  $J = 8.7$  Hz, 2H), 7.90 (d,  $J = 8.7$  Hz, 2H), 7.24 – 7.20 (m, 2H), 6.41 – 6.37 (m, 2H) ppm;  $^{13}\text{C}$  NMR (151 MHz, Chloroform-*d*)  $\delta$  165.6, 149.8, 138.9, 130.3, 123.7, 121.0, 114.2 ppm.

#### 1,1-Dimethylethyl 2-methyl-1*H*-pyrrole-1-carboxylate (1f)

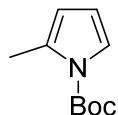

#### General procedure A

Clear oil (0.8 g, 91% yield);  $^1\text{H}$  NMR (600 MHz, Chloroform-*d*)  $\delta$  7.21 (dd,  $J = 3.6, 1.8$  Hz, 1H), 6.08 (t,  $J = 3.3$  Hz, 1H), 5.99 – 5.74 (m, 1H), 2.46 (s, 3H), 1.62 (s, 9H) ppm;  $^{13}\text{C}$  NMR (151 MHz, Chloroform-*d*)  $\delta$  149.6, 131.4, 120.4, 111.7, 109.8, 83.1, 27.9, 15.3 ppm.

#### 1,1-Dimethylethyl 2-(hydroxymethyl)-1*H*-pyrrole-1-carboxylate (1g)

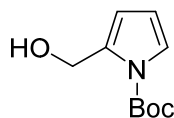

#### General procedure E

Clear oil (0.9 g, 93% yield);  $^1\text{H}$  NMR (600 MHz, Chloroform-*d*)  $\delta$  7.16 (dd,  $J = 3.4, 1.8$  Hz, 1H), 6.17 (dd,  $J = 3.3, 1.7$  Hz, 1H), 6.09 (t,  $J = 3.3$  Hz, 1H), 4.64 (d,  $J = 6.4$  Hz, 2H), 1.61 (s, 9H) ppm;  $^{13}\text{C}$  NMR (151 MHz, Chloroform-*d*)  $\delta$  150.0, 134.7, 121.8, 113.4, 110.2, 84.4, 57.6, 27.8 ppm.

#### *tert*-Butyl 2-(1-hydroxyethyl)-1*H*-pyrrole-1-carboxylate (1h)

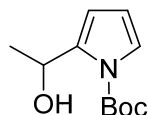

#### General procedure E

Clear oil (0.9 g, 90% yield);  $R_f = 0.5$  (3:1 hexanes/AcOEt);  $^1\text{H}$  NMR (600 MHz, Chloroform-*d*)  $\delta$  7.16 (dd,  $J = 3.4, 1.7$  Hz, 1H), 6.25 – 6.16 (m, 1H), 6.09 (t,  $J = 3.4$  Hz, 1H), 5.08 – 5.05 (m, 1H), 4.16 (d,  $J = 3.4$  Hz, 1H), 1.61 (s, 9H), 1.57 (d,  $J = 6.6$  Hz, 3H) ppm;  $^{13}\text{C}$  NMR (101 MHz, Chloroform-*d*)  $\delta$  150.3, 139.1, 121.9, 110.9, 110.2, 84.5, 62.0, 28.0, 20.3 ppm; IR (film)  $\nu_{max}$  3428, 1366, 1130, 788  $\text{cm}^{-1}$ ; HRMS (ESI-TOF)  $m/z$ :  $[\text{M} + \text{Na}]^+$  Calcd for  $\text{C}_{11}\text{H}_{17}\text{NO}_3\text{Na}$  234.1101; Found 234.1106.

#### 1,1-Dimethylethyl-2-phenyl-1*H*-pyrrole-1-carboxylate (1i)<sup>[10]</sup>

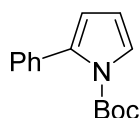

#### General procedure C



Clear oil (0.9 g, 78% yield);  $^1\text{H}$  NMR (600 MHz, Chloroform-*d*)  $\delta$  7.35 (d,  $J = 4.5$  Hz, 6H), 6.23 (t,  $J = 3.3$  Hz, 1H), 6.21 – 6.18 (m, 1H), 1.35 (s, 9H) ppm;  $^{13}\text{C}$  NMR (101 MHz, Chloroform-*d*)  $\delta$  149.4, 135.0, 134.4, 129.1, 127.5, 127.1, 122.5, 114.3, 110.5, 83.5, 27.5 ppm.

***tert*-Butyl 2-(2-chlorophenyl)-1*H*-pyrrole-1-carboxylate (1j)**

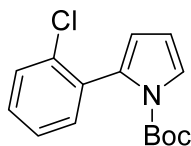

**General procedure C**

Clear oil (0.7 g, 54% yield);  $R_f = 0.5$  (50:1 hexanes/AcOEt);  $^1\text{H}$  NMR (400 MHz, Chloroform-*d*)  $\delta$  7.41 (dd,  $J = 3.3, 1.8$  Hz, 1H), 7.40 – 7.36 (m, 1H), 7.35 – 7.29 (m, 1H), 7.29 – 7.18 (m, 2H), 6.26 (d,  $J = 3.3$  Hz, 1H), 6.15 (dd,  $J = 3.3, 1.8$  Hz, 1H), 1.29 (s, 9H) ppm;  $^{13}\text{C}$  NMR (101 MHz, Chloroform-*d*)  $\delta$  149.0, 135.0, 134.4, 131.4, 131.1, 128.9, 128.8, 126.2, 121.9, 114.5, 110.4, 83.4, 27.4 ppm; IR (film)  $\nu_{max}$  1738, 1312, 1137, 851, 739  $\text{cm}^{-1}$ ; HRMS (ESI-TOF)  $m/z$ :  $[\text{M} + \text{H}]^+$  Calcd for  $\text{C}_{15}\text{H}_{17}\text{ClNO}_2$  278.0942; Found 278.0940.

**1,1-Dimethylethyl 2-(3-methylphenyl)-1*H*-pyrrole-1-carboxylate (1k)<sup>[11]</sup>**

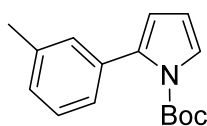

**General procedure C**

White solid (1.0 g, 82% yield);  $^1\text{H}$  NMR (600 MHz, Chloroform-*d*)  $\delta$  7.35 (dd,  $J = 3.3, 1.8$  Hz, 1H), 7.24 (t,  $J = 7.5$  Hz, 1H), 7.19 – 7.08 (m, 3H), 6.23 (t,  $J = 3.3$  Hz, 1H), 6.19 (dd,  $J = 3.3, 1.8$  Hz, 1H), 2.38 (d,  $J = 0.8$  Hz, 3H), 1.36 (d,  $J = 0.8$  Hz, 9H) ppm;  $^{13}\text{C}$  NMR (101 MHz, Chloroform-*d*)  $\delta$  149.4, 136.9, 135.1, 134.3, 129.9, 127.9, 127.5, 126.2, 122.4, 114.2, 110.5, 83.4, 27.6, 21.3 ppm.

**1,1-Dimethylethyl 2-(3-fluorophenyl)-1*H*-pyrrole-1-carboxylate (1l)**

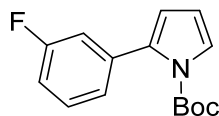

**General procedure C**

Yellow oil (0.7 g, 57% yield);  $R_f = 0.5$  (50:1 hexanes/AcOEt);  $^1\text{H}$  NMR (400 MHz, Chloroform-*d*)  $\delta$  7.45 – 7.27 (m, 2H), 7.18 – 6.92 (m, 3H), 6.23 (dq,  $J = 5.2, 3.2$  Hz, 2H), 1.39 (s, 9H) ppm;  $^{13}\text{C}$  NMR (101 MHz, Chloroform-*d*)  $\delta$  162.1 (d,  $J = 245.0$  Hz), 149.2, 136.4 (d,  $J = 8.6$  Hz), 133.6, 128.9 (d,  $J = 8.4$  Hz), 124.9 (d,  $J = 2.8$  Hz), 123.0, 116.2 (d,  $J = 22.0$  Hz), 114.9, 113.9 (d,  $J = 21.0$  Hz), 110.6, 83.8,

27.6 ppm;  $^{19}\text{F}$  NMR (565 MHz, Chloroform-*d*)  $\delta$  -115.04 ppm; IR (film)  $\nu_{\text{max}}$  1750, 1501, 1301, 1150, 809, 752  $\text{cm}^{-1}$ ; HRMS (ESI-TOF)  $m/z$ :  $[\text{M} + \text{Na}]^+$  Calcd for  $\text{C}_{15}\text{H}_{16}\text{NO}_2\text{FNa}$  284.1057; Found 284.1052.

**1,1-Dimethylethyl 2-(3-methoxyphenyl)-1*H*-pyrrole-1-carboxylate (1m)**

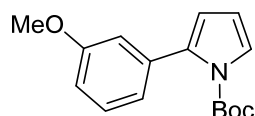

**General procedure C**

Yellow oil (1.2 g, 88% yield);  $^1\text{H}$  NMR (400 MHz, Chloroform-*d*)  $\delta$  7.34 (dd,  $J = 3.4, 1.8$  Hz, 1H), 7.25 (t,  $J = 7.7$  Hz, 1H), 7.02 – 6.69 (m, 3H), 6.51 – 5.89 (m, 3H), 3.80 (s, 3H), 1.36 (s, 9H) ppm;  $^{13}\text{C}$  NMR (101 MHz, Chloroform-*d*)  $\delta$  158.9, 149.3, 135.6, 134.8, 128.5, 122.5, 121.8, 114.8, 114.3, 112.8, 110.5, 83.5, 55.2, 27.5 ppm.

**1,1-Dimethylethyl 2-(4-cyanophenyl)-1*H*-pyrrole-1-carboxylate (1n)<sup>[12]</sup>**

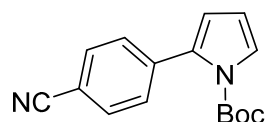

**General procedure C**

White solid (1.2 g, 89% yield);  $^1\text{H}$  NMR (400 MHz, Chloroform-*d*)  $\delta$  7.63 (d,  $J = 8.4$  Hz, 2H), 7.46 (d,  $J = 8.5$  Hz, 2H), 7.39 (dt,  $J = 3.2, 1.6$  Hz, 1H), 6.27 (tt,  $J = 6.5, 2.1$  Hz, 2H), 1.42 (s, 9H) ppm;  $^{13}\text{C}$  NMR (101 MHz, Chloroform-*d*)  $\delta$  148.9, 138.8, 133.1, 131.4, 129.6, 123.9, 119.0, 116.1, 111.0, 110.5, 84.4, 27.7 ppm.

**1,1-Dimethylethyl 2-(4-chlorophenyl)-1*H*-pyrrole-1-carboxylate (1o)<sup>[12]</sup>**

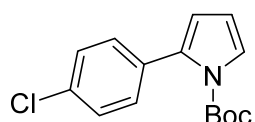

**General procedure C**

White solid (1.1 g, 78% yield);  $^1\text{H}$  NMR (400 MHz, Chloroform-*d*)  $\delta$  8.06 – 7.01 (m, 5H), 6.37 – 5.91 (m, 2H), 1.39 (s, 9H) ppm;  $^{13}\text{C}$  NMR (101 MHz, Chloroform-*d*)  $\delta$  149.2, 133.8, 133.1, 132.8, 130.5, 127.7, 122.8, 114.8, 110.6, 83.9, 27.7 ppm.

**1,1-Dimethylethyl 2-[4-(methoxycarbonyl)phenyl]-1*H*-pyrrole-1-carboxylate (1p)<sup>[13]</sup>**

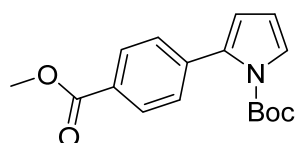

**General procedure C**

White solid (1.2 g, 81% yield);  $^1\text{H}$  NMR (400 MHz, Chloroform-*d*)  $\delta$  8.45 – 7.82 (m, 2H), 7.66 – 7.33 (m, 3H), 6.62 – 5.89 (m, 2H), 3.93 (s, 3H), 1.37 (d,  $J = 1.8$  Hz, 9H) ppm;  $^{13}\text{C}$  NMR (151 MHz, Chloroform-*d*)  $\delta$  166.9, 149.1, 138.9, 133.9, 128.9, 128.9, 128.5, 123.5, 115.4, 110.8, 84.0, 52.0, 27.6 ppm.

**1,1-Dimethylethyl 2-(3,4-dimethoxyphenyl)-1H-pyrrole-1-carboxylate (1q)**<sup>[14]</sup>

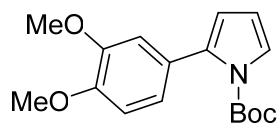

**General procedure C**

Yellow oil (0.9 g, 65% yield);  $^1\text{H}$  NMR (600 MHz, Chloroform-*d*)  $\delta$  7.32 (dd,  $J = 3.4, 1.8$  Hz, 1H), 6.90 (dd,  $J = 8.2, 2.0$  Hz, 1H), 6.87 (d,  $J = 2.0$  Hz, 1H), 6.85 (d,  $J = 8.2$  Hz, 1H), 6.20 (t,  $J = 3.3$  Hz, 1H), 6.15 (dd,  $J = 3.3, 1.8$  Hz, 1H), 3.87 (d,  $J = 13.2$  Hz, 6H), 1.38 (s, 9H) ppm;  $^{13}\text{C}$  NMR (151 MHz, Chloroform-*d*)  $\delta$  149.3, 148.4, 148.0, 134.9, 127.1, 122.2, 121.6, 114.0, 112.9, 110.4, 110.4, 83.4, 55.9, 55.8, 27.7 ppm.

**2-(3-Fluoro-4-nitrophenyl)-1H-pyrrole (1r)**

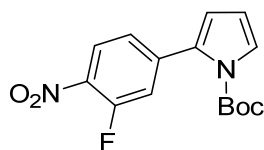

**General procedure C**

Yellow solid (0.7 g, 44% yield);  $R_f = 0.4$  (50:1 hexanes/AcOEt);  $^1\text{H}$  NMR (400 MHz, Chloroform-*d*)  $\delta$  8.06 (t,  $J = 8.3$  Hz, 1H), 7.41 (dd,  $J = 3.3, 1.7$  Hz, 1H), 7.31 – 7.27 (m, 2H), 6.35 (dd,  $J = 3.4, 1.7$  Hz, 1H), 6.27 (t,  $J = 3.4$  Hz, 1H), 1.47 (s, 9H) ppm;  $^{13}\text{C}$  NMR (101 MHz, Chloroform-*d*)  $\delta$  156.4, 153.8, 148.8, 142.1 (d,  $J = 9.3$  Hz), 131.7, 125.5 (d,  $J = 2.4$  Hz), 124.9, 124.9, 118.5 (d,  $J = 22.0$  Hz), 117.2, 111.4, 85.0, 27.8 ppm;  $^{19}\text{F}$  NMR (565 MHz, Chloroform-*d*)  $\delta$  -116.9 ppm; IR (film)  $\nu_{\text{max}}$  1700, 1605, 1520, 1356, 1172, 809, 665  $\text{cm}^{-1}$ ; HRMS (ESI-TOF)  $m/z$ :  $[\text{M} + \text{Na}]^+$  Calcd for  $\text{C}_{15}\text{H}_{15}\text{N}_2\text{O}_4\text{FNa}$  329.0908; Found 329.0912.

**tert-Butyl 2-(3,5-dimethylphenyl)-1H-pyrrole-1-carboxylate (1s)**<sup>[15]</sup>

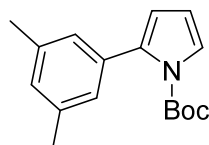

**General procedure C**

White solid (0.9 g, 67% yield);  $R_f = 0.3$  (100:1 hexanes/AcOEt); m.p. 55.1–56.3  $^{\circ}\text{C}$ ;  $^1\text{H}$  NMR (400 MHz,

Chloroform-*d*)  $\delta$  7.36 (dt,  $J = 3.3, 1.7$  Hz, 1H), 7.07 – 6.91 (m, 3H), 6.23 (td,  $J = 3.3, 1.1$  Hz, 1H), 6.19 (dt,  $J = 3.2, 1.6$  Hz, 1H), 2.36 (dd,  $J = 1.4, 0.7$  Hz, 6H), 1.38 (s, 9H) ppm;  $^{13}\text{C}$  NMR (101 MHz, Chloroform-*d*)  $\delta$  149.5, 136.8, 135.3, 134.2, 128.8, 127.0, 122.3, 114.0, 110.4, 83.3, 27.5, 21.2 ppm; IR (film)  $\nu_{\text{max}}$  1739, 1315, 1150, 849, 729  $\text{cm}^{-1}$ ; HRMS (ESI-TOF)  $m/z$ :  $[\text{M} + \text{Na}]^+$  Calcd for  $\text{C}_{17}\text{H}_{20}\text{NO}_2\text{Na}$  294.1465; Found 294.1461.

**1,1-Dimethylethyl 2-[3,5-bis(trifluoromethyl)phenyl]-1H-pyrrole-1-carboxylate (1t)**<sup>[16]</sup>

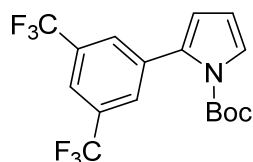

**General procedure C**

Clear oil (1.4 g, 72% yield);  $^1\text{H}$  NMR (400 MHz, Chloroform-*d*)  $\delta$  7.81 (s, 3H), 7.43 (dd,  $J = 3.4, 1.8$  Hz, 1H), 6.49 – 5.90 (m, 2H), 1.37 (d,  $J = 1.9$  Hz, 9H) ppm;  $^{13}\text{C}$  NMR (101 MHz, Chloroform-*d*)  $\delta$  148.9, 136.4, 131.6, 131.0 (q,  $J = 33.3$  Hz), 129.2, 124.0, 123.3 (q,  $J = 272.6$  Hz), 120.6, 116.3, 111.0, 84.6, 27.5 ppm.

**1,1-Dimethylethyl 2-[1,1'-biphenyl]-4-yl-1H-pyrrole-1-carboxylate (1u)**<sup>[17]</sup>

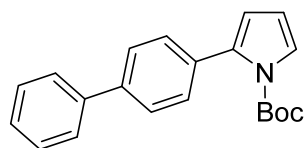

**General procedure C**

White solid (1.3 g, 79% yield);  $^1\text{H}$  NMR (600 MHz, Chloroform-*d*)  $\delta$  7.79 – 7.64 (m, 2H), 7.63 – 7.60 (m, 2H), 7.51 – 7.43 (m, 4H), 7.42 – 7.36 (m, 2H), 6.28 (td,  $J = 3.2, 2.2$  Hz, 2H), 1.42 (s, 9H) ppm;  $^{13}\text{C}$  NMR (101 MHz, Chloroform-*d*)  $\delta$  149.4, 140.9, 140.0, 134.7, 133.3, 129.5, 128.8, 127.2, 127.0, 126.3, 122.7, 114.5, 110.7, 83.7, 27.6 ppm.

**1,1-Dimethylethyl 2-(2-naphthalenyl)-1H-pyrrole-1-carboxylate (1v)**<sup>[18]</sup>

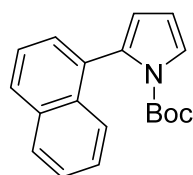

**General procedure C**

White solid (1.3 g, 90% yield);  $^1\text{H}$  NMR (600 MHz, Chloroform-*d*)  $\delta$  7.87 – 7.77 (m, 4H), 7.47 (ddd,  $J = 8.0, 3.6, 1.7$  Hz, 3H), 7.40 (dd,  $J = 3.3, 1.8$  Hz, 3H), 6.29 (dd,  $J = 3.3, 1.8$  Hz, 3H), 6.27 (t,  $J = 3.3$  Hz,

3H), 1.32 (s, 9H) ppm;  $^{13}\text{C}$  NMR (151 MHz, Chloroform-*d*)  $\delta$  149.4, 135.0, 133.0, 132.5, 131.9, 127.9, 127.9, 127.6, 127.3, 126.7, 126.1, 125.9, 122.7, 114.9, 110.7, 83.7, 77.2, 77.0, 76.8, 27.6 ppm.

**1,1-Dimethylethyl 2-(2-thienyl)-1*H*-pyrrole-1-carboxylate (1w)**<sup>[19]</sup>

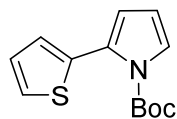

**General procedure C**

Yellow oil (0.9 g, 96% yield);  $^1\text{H}$  NMR (400 MHz, Chloroform-*d*)  $\delta$  7.39 (dd,  $J = 3.4, 1.8$  Hz, 1H), 7.31 (dd,  $J = 5.1, 1.3$  Hz, 1H), 7.07 (dd,  $J = 3.5, 1.3$  Hz, 1H), 7.03 (dd,  $J = 5.2, 3.5$  Hz, 1H), 6.33 (dd,  $J = 3.3, 1.8$  Hz, 1H), 6.23 (dd,  $J = 4.2, 2.5$  Hz, 1H), 1.44 (s, 9H) ppm;  $^{13}\text{C}$  NMR (101 MHz, Chloroform-*d*)  $\delta$  149.0, 134.9, 127.7, 126.8, 126.3, 125.5, 123.1, 116.5, 110.5, 83.7, 27.6 ppm.

**tert-Butyl 2-(5-methylpyridin-2-yl)-1*H*-pyrrole-1-carboxylate (1x)**<sup>[20]</sup>

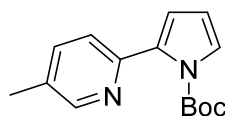

**General procedure C**

White solid (0.9 g, 70% yield);  $^1\text{H}$  NMR (400 MHz, Chloroform-*d*)  $\delta$  8.44 (dd,  $J = 1.6, 0.8$  Hz, 1H), 7.65 – 7.41 (m, 1H), 7.33 (dd,  $J = 3.3, 1.8$  Hz, 1H), 7.29 (dd,  $J = 7.8, 0.9$  Hz, 1H), 6.37 (dd,  $J = 3.3, 1.8$  Hz, 1H), 6.22 (t,  $J = 3.3$  Hz, 1H), 2.35 (s, 3H), 1.37 (s, 9H) ppm;  $^{13}\text{C}$  NMR (101 MHz, Chloroform-*d*)  $\delta$  150.2, 149.3, 149.2, 136.2, 134.1, 131.2, 123.2, 123.1, 115.2, 110.5, 83.5, 27.6, 18.2 ppm.

**1,1-Dimethylethyl 2-(5-methyl-2-pyridinyl)-1*H*-pyrrole-1-carboxylate (1y)**<sup>[21]</sup>

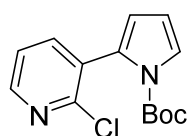

**General procedure C**

White solid (0.9 g, 66% yield);  $^1\text{H}$  NMR (400 MHz, Chloroform-*d*)  $\delta$  8.37 (ddd,  $J = 4.9, 2.0, 0.8$  Hz, 2H), 7.66 (ddd,  $J = 7.5, 1.9, 0.7$  Hz, 2H), 7.53 – 7.40 (m, 2H), 7.28 (dd,  $J = 4.8, 0.7$  Hz, 1H), 6.32 – 6.26 (m, 2H), 6.21 (dd,  $J = 3.3, 1.8$  Hz, 1H), 1.32 (s, 12H) ppm;  $^{13}\text{C}$  NMR (101 MHz, Chloroform-*d*)  $\delta$  152.0, 148.7, 148.3, 139.4, 131.2, 128.8, 122.6, 121.9, 115.4, 110.7, 84.0, 27.4 ppm.

**tert-Butyl 2-(pyridin-4-yl)-1*H*-pyrrole-1-carboxylate (1z)**

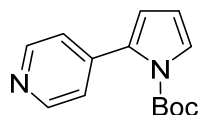

### General procedure C

Yellow oil (1.0 g, 80% yield);  $R_f = 0.4$  (3:1 hexanes/AcOEt);  $^1\text{H NMR}$  (600 MHz, Chloroform-*d*)  $\delta$  8.67 – 8.42 (m, 2H), 7.39 (dd,  $J = 3.4, 1.7$  Hz, 1H), 7.30 – 7.14 (m, 2H), 6.30 (dd,  $J = 3.4, 1.7$  Hz, 1H), 6.25 (t,  $J = 3.3$  Hz, 1H), 1.40 (s, 9H) ppm;  $^{13}\text{C NMR}$  (101 MHz, Chloroform-*d*)  $\delta$  149.0, 141.8, 132.3, 124.2, 116.2, 111.0, 84.4, 27.6 ppm; IR (film)  $\nu_{\text{max}}$  1719, 1697, 1411, 1293, 849  $\text{cm}^{-1}$ ; HRMS (ESI-TOF)  $m/z$ :  $[\text{M} + \text{H}]^+$  Calcd for  $\text{C}_{14}\text{H}_{17}\text{N}_2\text{O}_2$  245.1285; Found 245.1278.

### 1,1-Dimethylethyl 3-methyl-1*H*-pyrrole-1-carboxylate (**1a'**)<sup>[22]</sup>

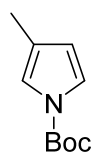

### General procedure A

Clear oil (0.9 g, 96% yield);  $^1\text{H NMR}$  (600 MHz, Chloroform-*d*)  $\delta$  7.14 (s, 1H), 6.97 (s, 1H), 6.05 (dd,  $J = 3.3, 1.7$  Hz, 1H), 2.06 (s, 3H), 1.58 (s, 9H) ppm;  $^{13}\text{C NMR}$  (151 MHz, Chloroform-*d*)  $\delta$  148.9, 122.3, 119.8, 117.1, 113.9, 82.9, 27.8, 11.7 ppm.

### 1,1-Dimethylethyl 3-(hydroxymethyl)-1*H*-pyrrole-1-carboxylate (**1b'**)

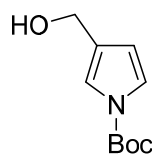

### General procedure E

Clear oil (0.9 g, 92% yield);  $R_f = 0.4$  (3:1 hexanes/AcOEt);  $^1\text{H NMR}$  (600 MHz, Chloroform-*d*)  $\delta$  7.19 (d,  $J = 1.9$  Hz, 2H), 6.23 (q,  $J = 2.0, 1.5$  Hz, 1H), 4.52 (d,  $J = 1.7$  Hz, 2H), 3.73 (d,  $J = 1.0$  Hz, 1H), 1.58 (d,  $J = 0.6$  Hz, 9H) ppm;  $^{13}\text{C NMR}$  (101 MHz, Chloroform-*d*)  $\delta$  148.7, 127.2, 120.4, 117.4, 111.5, 83.4, 57.9, 27.7 ppm; IR (film)  $\nu_{\text{max}}$  3387, 1735, 1481, 1350, 1165, 972  $\text{cm}^{-1}$ ; HRMS (ESI-TOF)  $m/z$ :  $[\text{M} + \text{Na}]^+$  Calcd for  $\text{C}_{10}\text{H}_{15}\text{NO}_3\text{Na}$  220.0944; Found 220.0948.

### *tert*-Butyl 3-(1-hydroxyethyl)-1*H*-pyrrole-1-carboxylate (**1c'**)

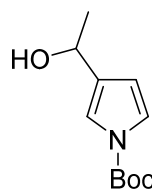

### General procedure E

Clear oil (0.9 g, 85% yield);  $R_f = 0.5$  (3:1 hexanes/AcOEt);  $^1\text{H NMR}$  (400 MHz, Chloroform-*d*)  $\delta$  7.19 –

7.09 (m, 2H), 6.47 – 5.96 (m, 1H), 4.81 (d,  $J = 6.7$  Hz, 1H), 1.57 (s, 9H), 1.47 (dd,  $J = 6.5, 2.0$  Hz, 3H) ppm;  $^{13}\text{C}$  NMR (101 MHz, Chloroform-*d*)  $\delta$  148.7, 132.4, 120.2, 115.8, 110.1, 83.4, 63.9, 27.7, 23.8 ppm; IR (film)  $\nu_{\text{max}}$  3341, 1726, 1470, 972  $\text{cm}^{-1}$ ; HRMS (ESI-TOF)  $m/z$ :  $[\text{M} + \text{Na}]^+$  Calcd for  $\text{C}_{11}\text{H}_{17}\text{NO}_3\text{Na}$  234.1101; Found 234.1107.

***tert*-Butyl 3-(acetoxymethyl)-1*H*-pyrrole-1-carboxylate (1d')**

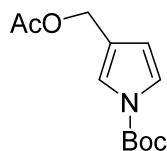

**General procedure F**

Clear oil (1.1 g, 91% yield);  $R_f = 0.4$  (10:1 hexanes/AcOEt);  $^1\text{H}$  NMR (600 MHz, Chloroform-*d*)  $\delta$  7.24 (s, 1H), 7.20 – 7.16 (m, 1H), 6.42 – 6.08 (m, 1H), 4.94 (s, 2H), 2.05 (s, 3H), 1.57 (s, 9H) ppm;  $^{13}\text{C}$  NMR (101 MHz, Chloroform-*d*)  $\delta$  170.8, 148.5, 122.0, 120.5, 119.4, 112.3, 83.8, 59.5, 27.8, 20.9 ppm; IR (film)  $\nu_{\text{max}}$  1736, 1474, 1351, 972  $\text{cm}^{-1}$ ; HRMS (ESI-TOF)  $m/z$ :  $[\text{M} + \text{Na}]^+$  Calcd for  $\text{C}_{12}\text{H}_{17}\text{NO}_4\text{Na}$  262.1050; Found 262.1050.

**1,1-Dimethylethyl 3-phenyl-1*H*-pyrrole-1-carboxylate (1e')<sup>[23]</sup>**

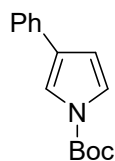

**General procedure B**

Clear oil (0.80 g, 63% yield);  $^1\text{H}$  NMR (600 MHz, Chloroform-*d*)  $\delta$  7.54 (dd,  $J = 8.3, 1.2$  Hz, 2H), 7.51 (s, 1H), 7.36 (dd,  $J = 8.4, 7.1$  Hz, 2H), 7.29 (d,  $J = 3.0$  Hz, 1H), 7.25 – 7.21 (m, 1H), 6.55 (dd,  $J = 3.3, 1.8$  Hz, 1H), 1.62 (s, 9H) ppm;  $^{13}\text{C}$  NMR (101 MHz, Chloroform-*d*)  $\delta$  148.8, 134.3, 128.7, 127.8, 126.6, 125.5, 120.9, 115.7, 110.4, 83.8, 28.0 ppm.

**1,1-Dimethylethyl 3-(2-pyridinyl)-1*H*-pyrrole-1-carboxylate (1f')<sup>[24]</sup>**

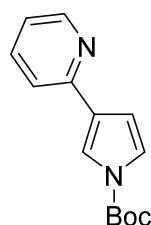

**General procedure B**

Yellow oil (0.70 g, 54% yield);  $^1\text{H}$  NMR (600 MHz, Chloroform-*d*)  $\delta$  8.57 (ddd,  $J = 4.9, 1.9, 1.0$  Hz, 1H), 7.81 (d,  $J = 1.9$  Hz, 1H), 7.65 (td,  $J = 7.7, 1.8$  Hz, 1H), 7.54 – 7.43 (m, 1H), 7.31 (dd,  $J = 3.3, 2.1$

Hz, 1H), 7.11 (ddd,  $J = 7.4, 4.9, 1.1$  Hz, 1H), 6.74 (dd,  $J = 3.3, 1.7$  Hz, 1H), 1.62 (s, 9H) ppm;  $^{13}\text{C}$  NMR (101 MHz, Chloroform-*d*)  $\delta$  153.0, 149.3, 148.5, 136.2, 127.9, 121.0, 120.9, 119.4, 118.0, 110.1, 83.8, 27.7 ppm.

**1,1-Dimethylethyl 4,5,6,7-tetrahydro-1*H*-indole-1-carboxylate (**1g'**)**<sup>[25]</sup>

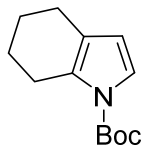

**General procedure A**

Clear oil (1.1 g, 94% yield);  $^1\text{H}$  NMR (600 MHz, Chloroform-*d*)  $\delta$  7.12 (d,  $J = 3.7$  Hz, 1H), 6.29 – 5.64 (m, 1H), 3.07 – 2.67 (m, 2H), 2.56 – 2.28 (m, 2H), 1.78 (dt,  $J = 6.1, 2.4$  Hz, 2H), 1.70 (d,  $J = 6.1$  Hz, 2H), 1.57 (s, 9H) ppm.

**tert-Butyl 1*H*-indole-1-carboxylate (**1h'**)**<sup>[26]</sup>

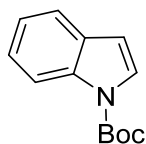

**General procedure A**

Clear oil (1.1 g, 96% yield);  $^1\text{H}$  NMR (400 MHz, Chloroform-*d*)  $\delta$  8.27 (d,  $J = 8.4$  Hz, 1H), 7.68 (d,  $J = 3.7$  Hz, 1H), 7.65 – 7.61 (m, 1H), 7.40 (tt,  $J = 7.1, 1.2$  Hz, 1H), 7.34 – 7.27 (m, 1H), 6.63 (d,  $J = 3.7$  Hz, 1H), 1.75 (s, 9H) ppm;  $^{13}\text{C}$  NMR (151 MHz, Chloroform-*d*)  $\delta$  149.8, 130.5, 125.8, 124.1, 122.6, 120.9, 115.1, 107.2, 83.5, 28.1 ppm.



## 4. Physical data of *gem*-bromonitroalkanes

### 1-Bromo-1-nitropropane (2a)<sup>[27]</sup>

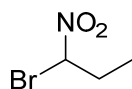

Yellow oil (4.2 g, 86% yield); <sup>1</sup>H NMR (600 MHz, Chloroform-*d*) δ 5.93 – 5.80 (m, 1H), 2.53 – 2.19 (m, 2H), 1.06 (t, *J* = 7.3 Hz, 3H) ppm; <sup>13</sup>C NMR (150 MHz, Chloroform-*d*) δ 81.2, 31.0, 10.4 ppm.

### 1-Bromo-1-nitroethane (2b)

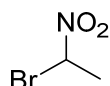

Yellow oil (4.3 g, 94% yield); <sup>1</sup>H NMR (600 MHz, Chloroform-*d*) δ 6.04 (q, *J* = 6.4 Hz, 1H), 2.14 (d, *J* = 6.5 Hz, 3H) ppm; <sup>13</sup>C NMR (150 MHz, Chloroform-*d*) δ 74.5, 24.2 ppm.

### (2-Bromo-2-nitroethyl)benzene (2c)

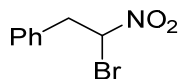

Yellow oil (1.1 g, 75% yield); <sup>1</sup>H NMR (400 MHz, Chloroform-*d*) δ 7.38 – 7.31 (m, 3H), 7.21 (dd, *J* = 7.3, 2.3 Hz, 2H), 6.06 (dd, *J* = 8.3, 6.1 Hz, 1H), 3.76 (dd, *J* = 14.5, 8.2 Hz, 1H), 3.52 (dd, *J* = 14.5, 6.1 Hz, 1H) ppm; <sup>13</sup>C NMR (100 MHz, Chloroform-*d*) δ 133.2, 129.1, 129.0, 128.3, 79.2, 43.4 ppm.

### 2-(2-Bromo-2-nitroethoxy)tetrahydro-2H-pyran (2d)

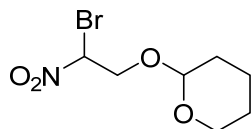

Clear oil (1.3 g, 71% yield); *R*<sub>f</sub> = 0.1 (10:1 hexanes/AcOEt); <sup>1</sup>H NMR (400 MHz, Chloroform-*d*) δ 6.02 (ddd, *J* = 12.6, 9.4, 3.6 Hz, 1H), 4.70 (dd, *J* = 33.0, 2.9 Hz, 1H), 4.47 – 4.20 (m, 1H), 4.01 (dddd, *J* = 50.0, 11.7, 3.7, 1.8 Hz, 1H), 3.85 – 3.69 (m, 1H), 3.60 – 3.49 (m, 1H), 1.99 – 1.14 (m, 6H) ppm; <sup>13</sup>C NMR (101 MHz, Chloroform-*d*) δ 100.5, 75.4, 69.7, 62.6, 30.0, 25.0, 18.9 ppm; IR (film) *v*<sub>max</sub> 1540, 1483, 1241, 556 cm<sup>-1</sup>; HRMS (ESI-TOF) *m/z*: [M + H]<sup>+</sup> Calcd for C<sub>7</sub>H<sub>13</sub>NO<sub>4</sub>Br 254.0022; Found 254.0020.

### 6-Bromo-6-nitrohexan-3-one (2e)

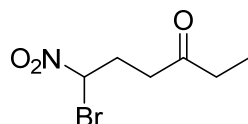

Clear oil (1.3 g, 76% yield);  $R_f = 0.1$  (20:1 hexanes/AcOEt);  $^1\text{H NMR}$  (400 MHz, Chloroform-*d*)  $\delta$  6.41 – 5.81 (m, 1H), 2.71 – 2.52 (m, 4H), 2.45 (q,  $J = 7.3$  Hz, 2H), 1.07 (t,  $J = 7.3$  Hz, 3H) ppm;  $^{13}\text{C NMR}$  (101 MHz, Chloroform-*d*)  $\delta$  208.3, 78.9, 37.5, 36.0, 31.2, 7.7 ppm; IR (film)  $\nu_{\text{max}}$  2915, 1630, 1560, 1033, 656  $\text{cm}^{-1}$ ; HRMS (ESI-TOF)  $m/z$ :  $[\text{M} + \text{Na}]^+$  Calcd for  $\text{C}_6\text{H}_{10}\text{NO}_3\text{BrNa}$  245.9736; Found 245.9737.

**Methyl 4-bromo-4-nitrobutanoate (2f)**

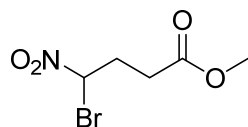

Clear oil (0.7 g, 41% yield);  $R_f = 0.2$  (20:1 hexanes/AcOEt);  $^1\text{H NMR}$  (400 MHz, Chloroform-*d*)  $\delta$  6.29 – 5.92 (m, 1H), 3.96 – 3.09 (m, 3H), 2.77 – 2.64 (m, 1H), 2.61 – 2.44 (m, 3H) ppm;  $^{13}\text{C NMR}$  (101 MHz, Chloroform-*d*)  $\delta$  171.4, 78.5, 52.1, 32.1, 29.8 ppm; IR (film)  $\nu_{\text{max}}$  2950, 1731, 1569, 1270, 1225, 858, 650  $\text{cm}^{-1}$ ; HRMS (ESI-TOF)  $m/z$ :  $[\text{M} + \text{Na}]^+$  Calcd for  $\text{C}_5\text{H}_8\text{BrNO}_4\text{Na}$  247.9529; Found 247.9527.

## 5. Cycloaddition reactions

### 5.1 Typical procedure

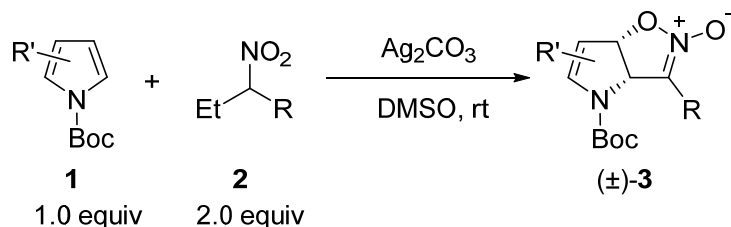

A dry Schlenk tube charged with a stirring bar was evacuated and backfilled with  $\text{N}_2$  (three times). Substituted 1-Boc-pyrrole (**1**, 0.50 mmol), 1-bromo-1-nitroalkane (**2**, 1.00 mmol),  $\text{Ag}_2\text{CO}_3$  (275 mg, 1.00 mmol) and anhydrous DMSO (6.0 mL) were added under  $\text{N}_2$  atmosphere. After stirring at rt under  $\text{N}_2$  for 12 h, the mixture was diluted with AcOEt, washed with brine ( $3 \times 50$  mL), dried over  $\text{Na}_2\text{SO}_4$ , and concentrated under reduced pressure. The crude product was purified by flash chromatography on silica gel (5:1 hexanes/AcOEt) to give **3aa**.

### 5.2 Physical data

#### 4-(*tert*-Butoxycarbonyl)-3-ethyl-3a,6a-dihydro-4*H*-pyrrolo[2,3-*d*]isoxazole 2-oxide (**3aa**)

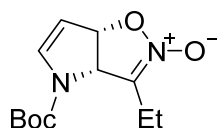

White solid (101 mg, 80% yield);  $R_f = 0.3$  (5:1 hexanes/AcOEt); m.p. 110.6–111.5 °C;  $^1\text{H}$  NMR (400 MHz, Chloroform-*d*)  $\delta$  6.84 (d,  $J = 61.8$  Hz, 1H), 5.98 – 5.74 (m, 1H), 5.56 (t,  $J = 9.5$  Hz, 1H), 5.21 (d,  $J = 23.9$  Hz, 1H), 2.58 – 2.41 (m, 2H), 1.48 (s, 9H), 1.13 (td,  $J = 7.5, 2.2$  Hz, 3H) ppm;  $^{13}\text{C}$  NMR (101 MHz, Chloroform-*d*)  $\delta$  150.7, 135.2, 115.5, 105.9, 82.2, 79.4, 65.8, 28.1, 19.0, 9.3 ppm; IR (film)  $\nu_{\text{max}}$  1709, 1636, 1458, 1354, 1138, 899, 786  $\text{cm}^{-1}$ ; HRMS (ESI-TOF)  $m/z$ :  $[\text{M} + \text{Na}]^+$  Calcd for  $\text{C}_{12}\text{H}_{18}\text{N}_2\text{O}_4\text{Na}$  277.1159; Found 277.1156.

#### 4-((Benzyloxy)carbonyl)-3-ethyl-3a,6a-dihydro-4*H*-pyrrolo[2,3-*d*]isoxazole 2-oxide (**3ba**)

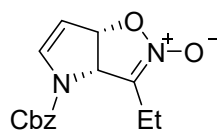

Yellow oil (78 mg, 54% yield);  $R_f = 0.2$  (5:1 hexanes/AcOEt);  $^1\text{H NMR}$  (400 MHz, Chloroform-*d*)  $\delta$  7.37 (s, 5H), 7.02 – 6.81 (m, 1H), 5.79 (d,  $J = 9.5$  Hz, 1H), 5.69 – 5.52 (m, 1H), 5.23 (d,  $J = 24.7$  Hz, 2H), 2.53 (ddd,  $J = 52.7, 14.3, 7.2$  Hz, 2H), 1.16 (s, 3H) ppm;  $^{13}\text{C NMR}$  (101 MHz, Chloroform-*d*)  $\delta$  151.6, 134.9, 134.3, 128.6, 128.1, 115.1, 107.1, 79.1, 68.1, 66.1, 18.9, 9.3 ppm; IR (film)  $\nu_{\text{max}}$  1735, 1609, 1594, 1441, 809  $\text{cm}^{-1}$ ; HRMS (ESI-TOF)  $m/z$ :  $[\text{M} + \text{H}]^+$  Calcd for  $\text{C}_{15}\text{H}_{17}\text{N}_2\text{O}_4$  289.1183; Found 289.1185.

### 3-Ethyl-4-pivaloyl-3a,6a-dihydro-4H-pyrrolo[2,3-*d*]isoxazole 2-oxide (3ca)

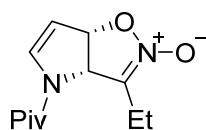

Yellow oil (62 mg, 52% yield);  $R_f = 0.2$  (5:1 hexanes/AcOEt);  $^1\text{H NMR}$  (600 MHz, Chloroform-*d*)  $\delta$  7.12 (d,  $J = 4.2$  Hz, 1H), 5.92 (d,  $J = 9.5$  Hz, 1H), 5.70 (d,  $J = 9.6$  Hz, 1H), 5.38 (d,  $J = 2.9$  Hz, 1H), 3.06 – 1.99 (m, 2H), 1.29 (s, 9H), 1.13 (t,  $J = 7.6$  Hz, 3H) ppm;  $^{13}\text{C NMR}$  (151 MHz, Chloroform-*d*)  $\delta$  175.0, 134.4, 116.0, 108.6, 77.1, 67.4, 39.3, 27.6, 19.4, 9.5 ppm; IR (film)  $\nu_{\text{max}}$  1713, 1612, 1474, 1120, 768  $\text{cm}^{-1}$ ; HRMS (ESI-TOF)  $m/z$ :  $[\text{M} + \text{H}]^+$  Calcd for  $\text{C}_{12}\text{H}_{19}\text{N}_2\text{O}_3$  239.1390; Found 239.1387.

### 4-Benzoyl-3-ethyl-3a,6a-dihydro-4H-pyrrolo[2,3-*d*]isoxazole 2-oxide (3da)

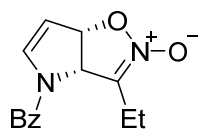

Yellow oil (77 mg, 60% yield);  $R_f = 0.1$  (5:1 hexanes/AcOEt);  $^1\text{H NMR}$  (600 MHz, Chloroform-*d*)  $\delta$  7.53 (d,  $J = 7.5$  Hz, 3H), 7.47 (dd,  $J = 8.3, 6.9$  Hz, 2H), 6.82 (d,  $J = 4.4$  Hz, 1H), 6.06 (d,  $J = 9.6$  Hz, 1H), 5.82 (dd,  $J = 9.5, 2.3$  Hz, 1H), 5.37 (dd,  $J = 4.5, 2.3$  Hz, 1H), 2.79 – 2.44 (m, 2H), 1.22 (t,  $J = 7.5$  Hz, 3H) ppm;  $^{13}\text{C NMR}$  (151 MHz, Chloroform-*d*)  $\delta$  167.4, 135.9, 133.9, 131.6, 128.9, 127.8, 115.5, 108.9, 78.4, 66.1, 19.4, 9.5 ppm; IR (film)  $\nu_{\text{max}}$  1715, 1604, 1466, 1322, 856  $\text{cm}^{-1}$ ; HRMS (ESI-TOF)  $m/z$ :  $[\text{M} + \text{Na}]^+$  Calcd for  $\text{C}_{14}\text{H}_{14}\text{N}_2\text{O}_3\text{Na}$  281.0897; Found 281.0894.

### 3-Ethyl-4-(4-nitrobenzoyl)-3a,6a-dihydro-4H-pyrrolo[2,3-*d*]isoxazole 2-oxide (3ea)

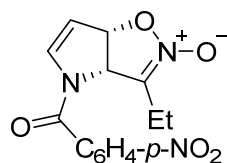

White solid (71 mg, 47% yield);  $R_f = 0.1$  (3:1 hexanes/AcOEt); m.p. 190.6–191.5  $^{\circ}\text{C}$ ;  $^1\text{H NMR}$  (400 MHz, Chloroform-*d*)  $\delta$  8.91 – 8.16 (m, 2H), 7.85 – 7.58 (m, 1H), 6.68 (d,  $J = 4.4$  Hz, 1H), 6.06 (dd,  $J =$

9.5, 0.9 Hz, 1H), 5.88 – 5.80 (m, 1H), 5.48 (ddd,  $J = 4.5, 2.4, 0.8$  Hz, 1H), 2.72 – 2.48 (m, 2H), 1.23 (t,  $J = 7.5$  Hz, 3H) ppm;  $^{13}\text{C}$  NMR (101 MHz, Chloroform-*d*)  $\delta$  165.1, 149.4, 139.6, 134.6, 128.9, 124.2, 114.9, 110.6, 78.1, 66.4, 19.4, 9.6 ppm; IR (film)  $\nu_{\text{max}}$  1717, 1632, 1609, 1524, 1346, 829  $\text{cm}^{-1}$ ; HRMS (ESI-TOF)  $m/z$ :  $[\text{M} + \text{Na}]^+$  Calcd for  $\text{C}_{14}\text{H}_{13}\text{N}_3\text{O}_5\text{Na}$  326.0747; Found 326.0751.

**4-(*tert*-Butoxycarbonyl)-3-ethyl-5-methyl-3a,6a-dihydro-4*H*-pyrrolo[2,3-*d*]isoxazole 2-oxide (3fa)**

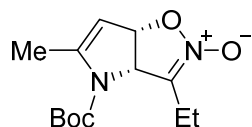

White solid (36 mg, 27% yield);  $R_f = 0.2$  (5:1 hexanes/AcOEt); m.p. 83.6–85.5  $^{\circ}\text{C}$ ;  $^1\text{H}$  NMR (400 MHz, Chloroform-*d*)  $\delta$  6.01 – 5.40 (m, 2H), 5.09 – 4.72 (m, 1H), 2.75 – 2.36 (m, 2H), 2.13 (s, 3H), 1.49 (s, 9H), 1.13 (t,  $J = 7.5$  Hz, 3H) ppm;  $^{13}\text{C}$  NMR (151 MHz, Chloroform-*d*)  $\delta$  151.5, 146.3, 116.0, 106.4, 82.3, 77.8, 68.1, 28.2, 19.0, 16.3, 9.5 ppm; IR (film)  $\nu_{\text{max}}$  1715, 1630, 1401, 1170, 864  $\text{cm}^{-1}$ ; HRMS (ESI-TOF)  $m/z$ :  $[\text{M} + \text{H}]^+$  Calcd for  $\text{C}_{13}\text{H}_{21}\text{N}_2\text{O}_4$  269.1495; Found 269.1489.

**4-(*tert*-Butoxycarbonyl)-3-ethyl-5-(hydroxymethyl)-3a,6a-dihydro-4*H*-pyrrolo[2,3-*d*]isoxazole 2-oxide (3ga)**

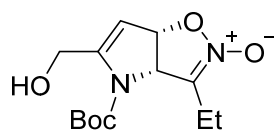

Clear oil (100 mg, 71% yield);  $R_f = 0.1$  (3:1 hexanes/AcOEt);  $^1\text{H}$  NMR (600 MHz, Chloroform-*d*)  $\delta$  5.92 – 5.52 (m, 2H), 5.28 (s, 1H), 4.36 (s, 2H), 2.92 – 2.02 (m, 2H), 1.54 (s, 9H), 1.14 (t,  $J = 7.5$  Hz, 3H) ppm;  $^{13}\text{C}$  NMR (101 MHz, Chloroform-*d*)  $\delta$  151.2, 148.7, 115.4, 106.8, 83.0, 77.7, 67.9, 58.2, 27.8, 18.6, 9.1 ppm; IR (film)  $\nu_{\text{max}}$  3448, 1715, 1603, 1391, 972  $\text{cm}^{-1}$ ; HRMS (ESI-TOF)  $m/z$ :  $[\text{M} + \text{H}]^+$  Calcd for  $\text{C}_{13}\text{H}_{21}\text{N}_2\text{O}_5$  285.1444; Found 285.1447.

**4-(*tert*-Butoxycarbonyl)-3-ethyl-5-(1-hydroxyethyl)-3a,6a-dihydro-4*H*-pyrrolo[2,3-*d*]isoxazole 2-oxide (3ha)**

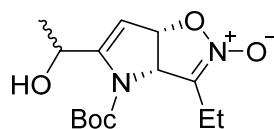

Total 92 mg, 62% yield, dr = 1:1.

Clear oil (48 mg, 33% yield);  $R_f = 0.1$  (3:1 hexanes/AcOEt);  $^1\text{H}$  NMR (600 MHz, Chloroform-*d*)  $\delta$  5.99 – 5.54 (m, 2H), 5.21 (s, 1H), 4.84 – 4.37 (m, 1H), 2.70 – 2.17 (m, 2H), 1.53 (s, 9H), 1.39 (dd,  $J = 6.5,$

1.8 Hz, 3H), 1.11 (td,  $J = 7.5, 1.8$  Hz, 3H) ppm;  $^{13}\text{C}$  NMR (101 MHz, Chloroform- $d$ )  $\delta$  152.1, 151.7, 115.1, 106.3, 83.6, 77.8, 68.5, 62.4, 28.2, 20.4, 18.8, 9.5 ppm; IR (film)  $\nu_{\text{max}}$  3426, 1710, 1596, 1397, 992  $\text{cm}^{-1}$ ; HRMS (ESI-TOF)  $m/z$ :  $[\text{M} + \text{H}]^+$  Calcd for  $\text{C}_{14}\text{H}_{23}\text{N}_2\text{O}_5$  299.1601; Found 299.1603.

Clear oil (43 mg, 29% yield);  $R_f = 0.1$  (3:1 hexanes/AcOEt);  $^1\text{H}$  NMR (400 MHz, Chloroform- $d$ )  $\delta$  5.81 – 5.61 (m, 1H), 5.33 – 5.27 (m, 1H), 4.69 (d,  $J = 6.8$  Hz, 1H), 2.56 – 2.25 (m, 2H), 1.50 (s, 9H), 1.39 (dd,  $J = 6.0, 1.8$  Hz, 3H), 1.14 – 1.06 (m, 3H) ppm;  $^{13}\text{C}$  NMR (101 MHz, Chloroform- $d$ )  $\delta$  151.7, 115.1, 106.3, 83.6, 77.8, 68.5, 62.4, 28.2, 20.4, 18.8, 9.5 ppm.

#### 4-(*tert*-Butoxycarbonyl)-3-ethyl-5-phenyl-3a,6a-dihydro-4*H*-pyrrolo[2,3-*d*]isoxazole 2-oxide (3ia)

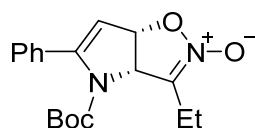

White solid (137 mg, 83% yield);  $R_f = 0.1$  (5:1 hexanes/AcOEt); m.p. 113.9–115.5 °C;  $^1\text{H}$  NMR (600 MHz, Chloroform- $d$ )  $\delta$  7.34 (d,  $J = 4.7$  Hz, 3H), 7.29 (d,  $J = 6.1$  Hz, 2H), 5.90 (d,  $J = 3.7$  Hz, 2H), 5.35 (s, 1H), 2.80 – 2.37 (m, 2H), 1.27 (dt,  $J = 9.5, 5.7$  Hz, 3H), 1.19 (s, 9H) ppm;  $^{13}\text{C}$  NMR (151 MHz, Chloroform- $d$ )  $\delta$  152.5, 148.8, 133.0, 128.9, 127.9, 126.8, 115.5, 110.0, 82.2, 78.7, 69.7, 27.7, 18.8, 9.5 ppm; IR (film)  $\nu_{\text{max}}$  1720, 1373, 1257, 1150, 709  $\text{cm}^{-1}$ ; HRMS (ESI-TOF)  $m/z$ :  $[\text{M} + \text{H}]^+$  Calcd for  $\text{C}_{18}\text{H}_{23}\text{N}_2\text{O}_4$  331.1652; Found 331.1654.

#### 4-(*tert*-Butoxycarbonyl)-5-(2-chlorophenyl)-3-ethyl-3a,6a-dihydro-4*H*-pyrrolo[2,3-*d*]isoxazole 2-oxide (3ja)

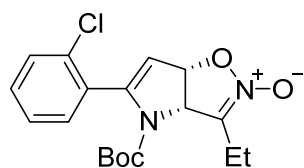

Yellow oil (114 mg, 63% yield);  $R_f = 0.2$  (5:1 hexanes/AcOEt);  $^1\text{H}$  NMR (400 MHz, Chloroform- $d$ )  $\delta$  7.37 (d,  $J = 7.7$  Hz, 1H), 7.33 – 7.19 (m, 3H), 5.90 (s, 2H), 5.28 (s, 1H), 2.66 – 2.49 (m, 2H), 1.24 (t,  $J = 7.4$  Hz, 3H), 1.13 (s, 9H) ppm;  $^{13}\text{C}$  NMR (101 MHz, Chloroform- $d$ )  $\delta$  151.3, 132.6, 132.4, 129.9, 129.7, 129.2, 126.4, 115.7, 110.5, 81.8, 77.8, 77.2, 68.3, 27.4, 18.8, 9.3 ppm; IR (film)  $\nu_{\text{max}}$  1715, 1649, 1490, 1370, 1128, 845  $\text{cm}^{-1}$ ; HRMS (ESI-TOF)  $m/z$ :  $[\text{M} + \text{H}]^+$  Calcd for  $\text{C}_{18}\text{H}_{22}\text{N}_2\text{O}_4\text{Cl}$  365.1262; Found 365.1259.

#### 4-(*tert*-Butoxycarbonyl)-3-ethyl-5-(*m*-tolyl)-3a,6a-dihydro-4*H*-pyrrolo[2,3-*d*]isoxazole 2-oxide (3ka)

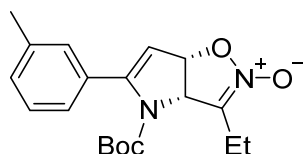

White solid (103 mg, 60% yield);  $R_f = 0.3$  (5:1 hexanes/AcOEt); m.p. 119.6–121.5 °C;  $^1\text{H NMR}$  (600 MHz, Chloroform-*d*)  $\delta$  7.22 (t,  $J = 7.9$  Hz, 1H), 7.17 – 7.12 (m, 1H), 7.09 – 7.05 (m, 2H), 5.88 (d,  $J = 1.5$  Hz, 2H), 5.33 (d,  $J = 1.3$  Hz, 1H), 2.73 – 2.47 (m, 2H), 2.35 (s, 3H), 1.27 (t,  $J = 7.5$  Hz, 3H), 1.19 (s, 9H) ppm;  $^{13}\text{C NMR}$  (101 MHz, Chloroform-*d*)  $\delta$  152.5, 148.9, 137.4, 132.7, 129.6, 127.8, 127.4, 123.9, 115.6, 109.7, 82.1, 78.7, 69.6, 27.6, 21.3, 18.7, 9.5 ppm; IR (film)  $\nu_{\text{max}}$  1717, 1615, 1474, 1348, 1119, 766  $\text{cm}^{-1}$ ; HRMS (ESI-TOF)  $m/z$ :  $[\text{M} + \text{H}]^+$  Calcd for  $\text{C}_{19}\text{H}_{25}\text{N}_2\text{O}_4$  345.1808; Found 345.1809.

**4-(tert-Butoxycarbonyl)-3-ethyl-5-(3-fluorophenyl)-3a,6a-dihydro-4H-pyrrolo[2,3-d]isoxazole 2-oxide (3la)**

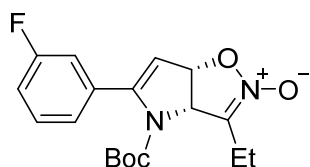

White solid (93 mg, 54% yield);  $R_f = 0.3$  (5:1 hexanes/AcOEt); m.p. 153.6–154.4 °C;  $^1\text{H NMR}$  (600 MHz, Chloroform-*d*)  $\delta$  7.30 (td,  $J = 8.1, 5.7$  Hz, 1H), 7.07 (dd,  $J = 7.7, 1.4$  Hz, 1H), 7.03 (td,  $J = 8.4, 2.6$  Hz, 1H), 6.98 (dd,  $J = 9.6, 2.1$  Hz, 1H), 5.89 (s, 2H), 5.38 (s, 1H), 2.85 – 2.22 (m, 2H), 1.25 (t,  $J = 7.5$  Hz, 3H), 1.21 (s, 6H) ppm;  $^{13}\text{C NMR}$  (151 MHz, Chloroform-*d*)  $\delta$  162.3 (d,  $J = 246.0$  Hz), 152.3, 147.6, 135.0 (d,  $J = 8.0$  Hz), 129.5 (d,  $J = 8.2$  Hz), 122.6, 122.5, 115.7 (d,  $J = 21.3$  Hz), 115.3, 114.0 (d,  $J = 23.0$  Hz), 110.9, 82.5, 78.5, 70.0, 27.7, 18.7, 9.5 ppm;  $^{19}\text{F NMR}$  (376 MHz, Chloroform-*d*)  $\delta$  -113.3 ppm; IR (film)  $\nu_{\text{max}}$  1705, 1643, 1342, 1141, 849  $\text{cm}^{-1}$ ; HRMS (ESI-TOF)  $m/z$ :  $[\text{M} + \text{H}]^+$  Calcd for  $\text{C}_{18}\text{H}_{22}\text{FN}_2\text{O}_4$  349.1558; Found 349.1564.

**4-(tert-Butoxycarbonyl)-3-ethyl-5-(3-methoxyphenyl)-3a,6a-dihydro-4H-pyrrolo[2,3-d]isoxazole 2-oxide (3ma)**

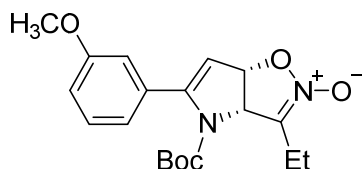

White solid (119 mg, 66% yield);  $R_f = 0.2$  (3:1 hexanes/AcOEt); m.p. 128.6–130.0 °C;  $^1\text{H NMR}$  (400 MHz, Chloroform-*d*)  $\delta$  7.86 – 7.07 (m, 1H), 6.93 – 6.86 (m, 2H), 6.83 (p,  $J = 1.1$  Hz, 1H), 5.89 (s, 2H), 5.36 (s, 1H), 3.80 (s, 3H), 2.62 – 2.53 (m, 2H), 1.26 (t,  $J = 7.5$  Hz, 3H), 1.21 (s, 9H) ppm;  $^{13}\text{C NMR}$  (101

MHz, Chloroform-*d*)  $\delta$  159.1, 152.4, 148.5, 134.1, 128.9, 119.2, 115.6, 114.1, 112.6, 110.0, 82.1, 78.6, 69.5, 55.2, 27.6, 18.6, 9.4 ppm; IR (film)  $\nu_{max}$  1701, 1639, 1369, 1342, 1049, 698  $\text{cm}^{-1}$ ; HRMS (ESI-TOF)  $m/z$ :  $[M + H]^+$  Calcd for  $\text{C}_{19}\text{H}_{25}\text{N}_2\text{O}_5$  361.1758; Found 361.1768.

**4-(*tert*-Butoxycarbonyl)-5-(4-cyanophenyl)-3-ethyl-3a,6a-dihydro-4*H*-pyrrolo[2,3-*d*]isoxazole 2-oxide (3na)**

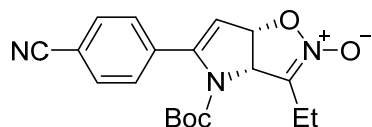

White solid (137 mg, 77% yield);  $R_f = 0.2$  (3:1 hexanes/AcOEt); m.p. 93.8–94.9  $^{\circ}\text{C}$ ;  $^1\text{H}$  NMR (400 MHz, Chloroform-*d*)  $\delta$  7.65 (d,  $J = 8.4$  Hz, 2H), 7.40 (d,  $J = 8.4$  Hz, 2H), 5.92 (d,  $J = 1.0$  Hz, 2H), 5.47 (s, 1H), 3.07 – 2.20 (m, 2H), 1.29 – 1.19 (m, 12H) ppm;  $^{13}\text{C}$  NMR (101 MHz, Chloroform-*d*)  $\delta$  152.1, 147.1, 137.4, 131.8, 127.5, 118.3, 115.0, 112.5, 112.4, 83.1, 78.3, 69.7, 27.7, 18.7, 9.5 ppm; IR (film)  $\nu_{max}$  2147, 1725, 1674, 1378, 1119, 776  $\text{cm}^{-1}$ ; HRMS (ESI-TOF)  $m/z$ :  $[M + H]^+$  Calcd for  $\text{C}_{19}\text{H}_{22}\text{N}_3\text{O}_4$  356.1604; Found 356.1608.

**4-(*tert*-Butoxycarbonyl)-5-(4-chlorophenyl)-3-ethyl-3a,6a-dihydro-4*H*-pyrrolo[2,3-*d*]isoxazole 2-oxide (3oa)**

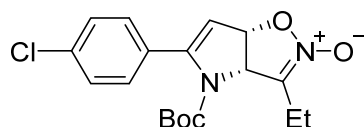

White solid (129 mg, 71% yield);  $R_f = 0.2$  (5:1 hexanes/AcOEt); m.p. 98.6–99.3  $^{\circ}\text{C}$ ;  $^1\text{H}$  NMR (600 MHz, Chloroform-*d*)  $\delta$  7.33 (d,  $J = 8.5$  Hz, 2H), 7.22 (d,  $J = 8.5$  Hz, 2H), 5.89 (s, 2H), 5.36 (s, 1H), 2.60 – 2.54 (m, 2H), 1.26 (t,  $J = 7.6$  Hz, 3H), 1.24 (s, 9H) ppm;  $^{13}\text{C}$  NMR (151 MHz, Chloroform-*d*)  $\delta$  152.3, 147.8, 134.8, 131.3, 128.2, 128.1, 115.3, 110.5, 82.6, 78.5, 69.6, 53.4, 27.7, 18.7, 9.5 ppm; IR (film)  $\nu_{max}$  1705, 1639, 1474, 1489, 1369, 1146, 1092, 845  $\text{cm}^{-1}$ ; HRMS (ESI-TOF)  $m/z$ :  $[M + H]^+$  Calcd for  $\text{C}_{18}\text{H}_{22}\text{N}_2\text{O}_4\text{Cl}$  365.1262; Found 365.1259.

**4-(*tert*-Butoxycarbonyl)-3-ethyl-5-(4-(methoxycarbonyl)phenyl)-3a,6a-dihydro-4*H*-pyrrolo[2,3-*d*]isoxazole 2-oxide (3pa)**

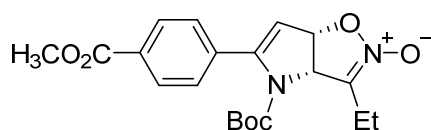



White solid (157 mg, 81% yield);  $R_f = 0.1$  (5:1 hexanes/AcOEt); m.p. 88.3–89.5 °C;  $^1\text{H NMR}$  (600 MHz, Chloroform-*d*)  $\delta$  8.45 – 7.75 (m, 2H), 7.57 – 7.03 (m, 2H), 5.90 (d,  $J = 1.1$  Hz, 2H), 5.43 (s, 1H), 3.91 (s, 3H), 2.85 – 2.15 (m, 2H), 1.25 (t,  $J = 7.5$  Hz, 3H), 1.17 (s, 9H) ppm;  $^{13}\text{C NMR}$  (151 MHz, Chloroform-*d*)  $\delta$  166.4, 152.3, 147.9, 137.4, 130.3, 129.2, 126.8, 115.2, 111.5, 82.7, 78.5, 70.0, 52.2, 27.7, 18.7, 9.5 ppm; IR (film)  $\nu_{\text{max}}$  1720, 1639, 1369, 1280, 1149, 1111, 771  $\text{cm}^{-1}$ ; HRMS (ESI-TOF)  $m/z$ :  $[\text{M} + \text{H}]^+$  Calcd for  $\text{C}_{20}\text{H}_{25}\text{N}_2\text{O}_6$  389.1707; Found 389.1708.

**4-(*tert*-Butoxycarbonyl)-5-(3,4-dimethoxyphenyl)-3-ethyl-3a,6a-dihydro-4*H*-pyrrolo[2,3-*d*]isoxazole 2-oxide (3qa)**

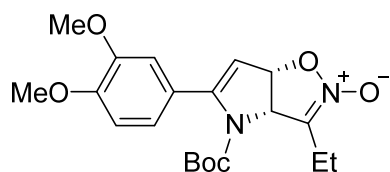

White solid (132 mg, 68% yield);  $R_f = 0.2$  (3:1 hexanes/AcOEt); m.p. 123.6–125.5 °C;  $^1\text{H NMR}$  (400 MHz, Chloroform-*d*)  $\delta$  6.90 – 6.80 (m, 2H), 6.78 (t,  $J = 1.7$  Hz, 1H), 5.86 (d,  $J = 1.5$  Hz, 2H), 5.30 (d,  $J = 1.5$  Hz, 1H), 3.86 (dd,  $J = 9.9, 1.4$  Hz, 6H), 2.70 – 2.44 (m, 2H), 1.24 (t,  $J = 1.9$  Hz, 12H) ppm;  $^{13}\text{C NMR}$  (101 MHz, Chloroform-*d*)  $\delta$  152.5, 149.6, 148.5, 148.3, 125.3, 119.6, 115.6, 110.4, 110.1, 109.1, 82.1, 78.7, 69.6, 55.9, 55.8, 27.8, 18.7, 9.5 ppm; IR (film)  $\nu_{\text{max}}$  1739, 1505, 1474, 1379, 1171, 765  $\text{cm}^{-1}$ ; HRMS (ESI-TOF)  $m/z$ :  $[\text{M} + \text{H}]^+$  Calcd for  $\text{C}_{20}\text{H}_{27}\text{N}_2\text{O}_6$  391.1863; Found 391.1860.

**4-(*tert*-Butoxycarbonyl)-3-ethyl-5-(3-fluoro-4-nitrophenyl)-3a,6a-dihydro-4*H*-pyrrolo[2,3-*d*]isoxazole 2-oxide (3ra)**

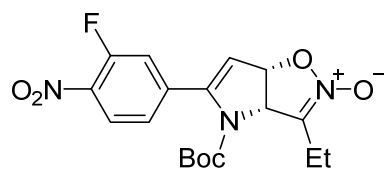

Yellow solid (84 mg, 43% yield);  $R_f = 0.2$  (3:1 hexanes/AcOEt); m.p. 133.6–134.9 °C;  $^1\text{H NMR}$  (600 MHz, Chloroform-*d*)  $\delta$  8.07 (t,  $J = 8.0$  Hz, 1H), 7.24 – 7.19 (m, 2H), 5.91 (d,  $J = 23.1$  Hz, 2H), 5.56 (s, 1H), 2.6 – 2.50 (m, 2H), 1.30 (s, 9H), 1.26 (t,  $J = 7.1$  Hz, 3H) ppm;  $^{13}\text{C NMR}$  (151 MHz, Chloroform-*d*)  $\delta$  155.1 (d,  $J = 265.4$  Hz), 151.9, 145.8, 140.5 (d,  $J = 8.6$  Hz), 136.8, 125.9, 122.9 (d,  $J = 3.8$  Hz), 116.8 (d,  $J = 22.4$  Hz), 114.8, 113.6, 83.5, 78.2, 69.8, 27.8, 18.7, 9.5 ppm;  $^{19}\text{F NMR}$  (565 MHz, Chloroform-*d*)  $\delta$  -116.94 ppm; IR (film)  $\nu_{\text{max}}$  1714, 1505, 1494, 1258, 1019, 759  $\text{cm}^{-1}$ ; HRMS (ESI-TOF)  $m/z$ :  $[\text{M} + \text{H}]^+$  Calcd for  $\text{C}_{18}\text{H}_{21}\text{N}_3\text{O}_6\text{F}$  394.1408; Found 394.1404.

**4-(*tert*-Butoxycarbonyl)-5-(3,5-dimethylphenyl)-3-ethyl-3a,6a-dihydro-4*H*-pyrrolo[2,3-*d*]isoxazole 2-oxide (3sa)**

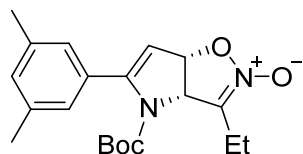

White solid (116 mg, 65% yield);  $R_f = 0.3$  (5:1 hexanes/AcOEt); m.p. 127.6–128.8 °C;  $^1\text{H NMR}$  (400 MHz, Chloroform-*d*)  $\delta$  6.96 (s, 1H), 6.87 (s, 2H), 5.86 (d,  $J = 1.8$  Hz, 2H), 5.31 (d,  $J = 1.6$  Hz, 1H), 2.74 – 2.47 (m, 2H), 2.30 (s, 6H), 1.26 (m, 3H), 1.19 (s, 9H) ppm;  $^{13}\text{C NMR}$  (101 MHz, Chloroform-*d*)  $\delta$  152.4, 148.9, 137.1, 132.5, 130.3, 124.5, 115.6, 109.3, 81.8, 78.6, 69.4, 27.5, 21.0, 18.6, 9.4 ppm; IR (film)  $\nu_{\text{max}}$  1724, 1642, 1152, 844, 732  $\text{cm}^{-1}$ ; HRMS (ESI-TOF)  $m/z$ :  $[\text{M} + \text{H}]^+$  Calcd for  $\text{C}_{20}\text{H}_{27}\text{N}_2\text{O}_4$  359.1965; Found 359.1960.

**5-(3,5-Bis(trifluoromethyl)phenyl)-4-(*tert*-butoxycarbonyl)-3-ethyl-3a,6a-dihydro-4*H*-pyrrolo[2,3-*d*]isoxazole 2-oxide (3ta)**

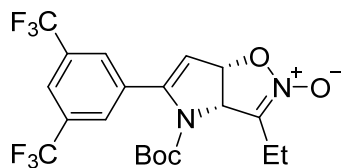

White solid (137 mg, 59% yield);  $R_f = 0.2$  (5:1 hexanes/AcOEt); m.p. 146.9–150.5 °C;  $^1\text{H NMR}$  (400 MHz, Chloroform-*d*)  $\delta$  7.87 (dt,  $J = 1.6, 0.9$  Hz, 1H), 7.98 – 7.37 (m, 2H), 6.72 – 5.81 (m, 2H), 5.53 (d,  $J = 1.6$  Hz, 1H), 3.40 – 2.18 (m, 2H), 1.27 (t,  $J = 7.5$  Hz, 4H), 1.18 (s, 9H) ppm;  $^{13}\text{C NMR}$  (101 MHz, Chloroform-*d*)  $\delta$  152.0, 146.1, 135.1, 131.6 (q,  $J = 33.3$  Hz), 127.1, 124.4, 122.4, 121.6, 114.9, 112.6, 83.3, 78.1, 69.7, 27.6, 18.8, 9.5 ppm;  $^{19}\text{F NMR}$  (376 MHz, Chloroform-*d*)  $\delta$  -62.9 ppm; IR (film)  $\nu_{\text{max}}$  1717, 1643, 1281, 1173, 1134, 991, 845  $\text{cm}^{-1}$ ; HRMS (ESI-TOF)  $m/z$ :  $[\text{M} + \text{H}]^+$  Calcd for  $\text{C}_{20}\text{H}_{21}\text{N}_2\text{O}_4\text{F}_6$  467.1400; Found 467.1394.

**5-([1,1'-Biphenyl]-4-yl)-4-(*tert*-butoxycarbonyl)-3-ethyl-3a,6a-dihydro-4*H*-pyrrolo[2,3-*d*]isoxazole 2-oxide (3ua)**

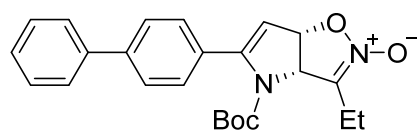

Yellow solid (148 mg, 73% yield);  $R_f = 0.3$  (5:1 hexanes/AcOEt); m.p. 89.6–90.6 °C;  $^1\text{H NMR}$  (600 MHz, Chloroform-*d*)  $\delta$  7.66 – 7.54 (m, 4H), 7.51 – 7.41 (m, 2H), 7.40 – 7.34 (m, 2H), 5.92 (d,  $J = 1.0$

Hz, 2H), 5.42 (d,  $J = 1.0$  Hz, 1H), 2.69 – 2.49 (m, 2H), 1.29 (t,  $J = 7.5$  Hz, 3H), 1.23 (s, 9H) ppm;  $^{13}\text{C}$  NMR (101 MHz, Chloroform- $d$ )  $\delta$  152.5, 148.5, 141.8, 140.4, 131.7, 128.8, 127.6, 127.3, 127.0, 126.6, 115.6, 110.0, 82.4, 78.7, 69.7, 27.7, 18.7, 9.6 ppm; IR (film)  $\nu_{\text{max}}$  1713, 1643, 1366, 1150, 741  $\text{cm}^{-1}$ ; HRMS (ESI-TOF)  $m/z$ :  $[\text{M} + \text{H}]^+$  Calcd for  $\text{C}_{24}\text{H}_{27}\text{N}_2\text{O}_4$  407.1965; Found 407.1964.

**4-(*tert*-Butoxycarbonyl)-3-ethyl-5-(naphthalen-1-yl)-3a,6a-dihydro-4H-pyrrolo[2,3-*d*]isoxazole 2-oxide (3va)**

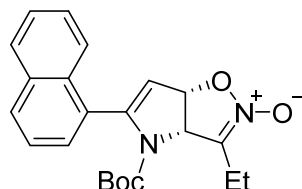

White solid (146 mg, 77% yield);  $R_f = 0.3$  (5:1 hexanes/AcOEt); m.p. 151.6–152.4  $^{\circ}\text{C}$ ;  $^1\text{H}$  NMR (400 MHz, Chloroform- $d$ )  $\delta$  8.05 – 7.69 (m, 4H), 7.58 – 7.45 (m, 2H), 7.35 (d,  $J = 8.4$  Hz, 1H), 5.94 (d,  $J = 1.9$  Hz, 2H), 5.58 – 5.36 (m, 1H), 2.89 – 2.21 (m, 2H), 1.30 (td,  $J = 7.6, 2.0$  Hz, 3H), 1.13 (d,  $J = 2.1$  Hz, 9H) ppm;  $^{13}\text{C}$  NMR (151 MHz, Chloroform- $d$ )  $\delta$  152.5, 148.9, 133.4, 132.7, 130.3, 128.0, 127.7, 127.4, 126.6, 126.5, 125.9, 124.7, 115.6, 110.3, 82.4, 78.7, 69.7, 27.6, 18.8, 9.6 ppm; IR (film)  $\nu_{\text{max}}$  1701, 1639, 1380, 1342, 1165, 1138, 844, 748  $\text{cm}^{-1}$ ; HRMS (ESI-TOF)  $m/z$ :  $[\text{M} + \text{H}]^+$  Calcd for  $\text{C}_{22}\text{H}_{25}\text{N}_2\text{O}_4$  381.1808; Found 381.1803.

**4-(*tert*-Butoxycarbonyl)-3-ethyl-5-(thiophen-2-yl)-3a,6a-dihydro-4H-pyrrolo[2,3-*d*]isoxazole 2-oxide (3wa)**

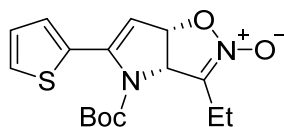

White solid (96 mg, 57% yield);  $R_f = 0.2$  (5:1 hexanes/AcOEt); m.p. 97.1–99.0  $^{\circ}\text{C}$ ;  $^1\text{H}$  NMR (400 MHz, Chloroform- $d$ )  $\delta$  7.32 (dd,  $J = 5.0, 1.2$  Hz, 1H), 7.08 (dd,  $J = 3.7, 1.2$  Hz, 1H), 6.99 (dd,  $J = 5.1, 3.6$  Hz, 1H), 6.21 – 5.66 (m, 2H), 5.44 (d,  $J = 1.6$  Hz, 1H), 2.61 – 2.49 (m, 2H), 1.31 (s, 9H), 1.24 (t,  $J = 7.5$  Hz, 3H) ppm;  $^{13}\text{C}$  NMR (101 MHz, Chloroform- $d$ )  $\delta$  152.4, 142.1, 133.8, 127.0, 126.7, 126.2, 115.5, 110.63, 82.5, 78.4, 70.0, 27.8, 18.7, 9.5 ppm; IR (film)  $\nu_{\text{max}}$  1721, 1625, 1366, 1250, 1150, 845, 733  $\text{cm}^{-1}$ ; HRMS (ESI-TOF)  $m/z$ :  $[\text{M} + \text{H}]^+$  Calcd for  $\text{C}_{16}\text{H}_{21}\text{N}_2\text{O}_4\text{S}$  337.1217; Found 337.1215.

**4-(*tert*-Butoxycarbonyl)-3-ethyl-5-(5-methylpyridin-2-yl)-3a,6a-dihydro-4H-pyrrolo[2,3-*d*]isoxazole 2-oxide (3xa)**

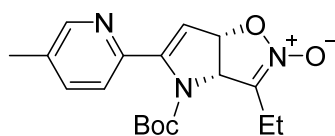

White solid (81 mg, 47% yield);  $R_f = 0.1$  (3:1 hexanes/AcOEt); m.p. 168.6–169.8 °C;  $^1\text{H NMR}$  (400 MHz, Chloroform-*d*)  $\delta$  8.46 – 8.25 (m, 1H), 7.48 (ddd,  $J = 8.0, 2.2, 0.8$  Hz, 1H), 7.18 – 7.10 (m, 1H), 6.15 – 5.83 (m, 2H), 5.61 (d,  $J = 1.6$  Hz, 1H), 2.61 – 2.52 (m, 2H), 2.34 (s, 3H), 1.24 (t,  $J = 7.5$  Hz, 3H), 1.20 (s, 9H) ppm;  $^{13}\text{C NMR}$  (101 MHz, Chloroform-*d*)  $\delta$  152.4, 149.3, 148.7, 148.0, 136.2, 133.2, 121.9, 115.5, 111.7, 82.3, 78.7, 69.7, 27.7, 18.7, 18.3, 9.4 ppm; IR (film)  $\nu_{\text{max}}$  1710, 1641, 1561, 1482, 1331, 1151, 843  $\text{cm}^{-1}$ ; HRMS (ESI-TOF)  $m/z$ :  $[\text{M} + \text{H}]^+$  Calcd for  $\text{C}_{18}\text{H}_{24}\text{N}_3\text{O}_4$  346.1761; Found 346.1770.

**4-(tert-Butoxycarbonyl)-5-(2-chloropyridin-3-yl)-3-ethyl-3a,6a-dihydro-4H-pyrrolo[2,3-*d*]isoxazole 2-oxide (3ya)**

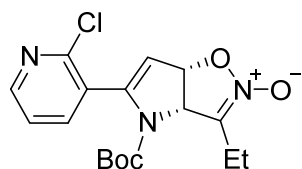

White solid (100 mg, 55% yield);  $R_f = 0.1$  (3:1 hexanes/AcOEt); m.p. 147.3–148.0 °C;  $^1\text{H NMR}$  (400 MHz, Chloroform-*d*)  $\delta$  8.41 (d,  $J = 5.0$  Hz, 1H), 7.64 (dd,  $J = 7.5, 2.0$  Hz, 1H), 7.44 – 7.17 (m, 1H), 5.93 (s, 2H), 5.36 (s, 1H), 2.68 – 2.49 (m, 2H), 1.24 (t,  $J = 7.4$  Hz, 4H), 1.17 (s, 9H) ppm;  $^{13}\text{C NMR}$  (101 MHz, Chloroform-*d*)  $\delta$  150.8, 149.2, 143.9, 137.9, 129.2, 128.7, 122.0, 115.2, 111.4, 82.3, 77.5, 68.2, 27.4, 18.8, 9.2 ppm; IR (film)  $\nu_{\text{max}}$  1704, 1640, 1395, 1136, 842  $\text{cm}^{-1}$ ; HRMS (ESI-TOF)  $m/z$ :  $[\text{M} + \text{H}]^+$  Calcd for  $\text{C}_{17}\text{H}_{21}\text{N}_3\text{O}_4\text{Cl}$  366.1215; Found 366.1202.

**4-(tert-Butoxycarbonyl)-3-ethyl-5-(pyridin-4-yl)-3a,6a-dihydro-4H-pyrrolo[2,3-*d*]isoxazole 2-oxide (3za)**

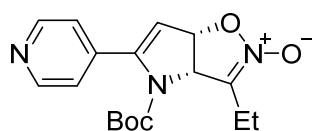

White solid (58 mg, 35% yield);  $R_f = 0.1$  (3:1 hexanes/AcOEt); m.p. 140.1–141.2 °C;  $^1\text{H NMR}$  (400 MHz, Chloroform-*d*)  $\delta$  8.58 (d,  $J = 5.1$  Hz, 2H), 7.20 – 7.14 (m, 2H), 5.89 (s, 2H), 5.48 (s, 1H), 2.64 – 2.43 (m, 2H), 1.26 – 1.06 (m, 12H) ppm;  $^{13}\text{C NMR}$  (101 MHz, Chloroform-*d*)  $\delta$  152.1, 149.6, 146.6, 140.7, 121.3, 115.0, 112.6, 83.2, 78.3, 69.8, 27.7, 18.7, 9.5 ppm; IR (film)  $\nu_{\text{max}}$  1705, 1639, 1597, 1401,

1293, 1138, 841  $\text{cm}^{-1}$ ; HRMS (ESI-TOF)  $m/z$ :  $[\text{M} + \text{H}]^+$  Calcd for  $\text{C}_{17}\text{H}_{22}\text{N}_3\text{O}_4$  332.1604; Found 332.1603.

**4-(*tert*-Butoxycarbonyl)-3-ethyl-6-methyl-3a,6a-dihydro-4*H*-pyrrolo[2,3-*d*]isoxazole 2-oxide (3a'a)**

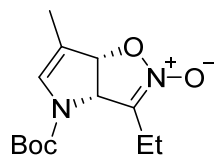

White solid (68 mg, 51% yield);  $R_f = 0.2$  (5:1 hexanes/AcOEt); m.p. 81.1–83.0  $^{\circ}\text{C}$ ;  $^1\text{H}$  NMR (400 MHz, Chloroform-*d*)  $\delta$  6.43 (d,  $J = 57.9$  Hz, 1H), 5.53 (d,  $J = 16.6$  Hz, 2H), 2.54 – 2.37 (m, 2H), 1.73 (s, 3H), 1.45 (s, 9H), 1.11 (t,  $J = 7.5$  Hz, 3H) ppm;  $^{13}\text{C}$  NMR (101 MHz, Chloroform-*d*)  $\delta$  150.8, 128.4, 116.2, 115.9, 82.5, 81.4, 65.8, 28.1, 18.9, 10.8, 9.3 ppm; IR (film)  $\nu_{\text{max}}$  1705, 1628, 1396, 1165, 864  $\text{cm}^{-1}$ ; HRMS (ESI-TOF)  $m/z$ :  $[\text{M} + \text{H}]^+$  Calcd for  $\text{C}_{13}\text{H}_{21}\text{N}_2\text{O}_4$  269.1495; Found 269.1493.

**4-(*tert*-Butoxycarbonyl)-3-ethyl-6-(hydroxymethyl)-3a,6a-dihydro-4*H*-pyrrolo[2,3-*d*]isoxazole 2-oxide (3b'a)**

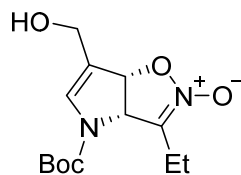

Clear oil (90 mg, 64% yield);  $R_f = 0.2$  (2:1 hexanes/AcOEt);  $^1\text{H}$  NMR (400 MHz, Chloroform-*d*)  $\delta$  6.77 (d,  $J = 59.8$  Hz, 1H), 5.84 (d,  $J = 19.2$  Hz, 1H), 5.66 (d,  $J = 9.5$  Hz, 1H), 4.29 (s, 2H), 2.75 – 2.42 (m, 2H), 2.12 (s, 1H), 1.48 (s, 9H), 1.15 (d,  $J = 6.2$  Hz, 3H) ppm;  $^{13}\text{C}$  NMR (101 MHz, Chloroform-*d*)  $\delta$  150.8, 131.1, 119.6, 116.1, 82.3, 78.9, 66.4, 57.0, 28.1, 19.0, 9.3 ppm; IR (film)  $\nu_{\text{max}}$  3441, 1705, 1643, 1381, 1165, 902  $\text{cm}^{-1}$ ; HRMS (ESI-TOF)  $m/z$ :  $[\text{M} + \text{H}]^+$  Calcd for  $\text{C}_{13}\text{H}_{21}\text{N}_2\text{O}_5$  285.1444; Found 285.1439.

**4-(*tert*-Butoxycarbonyl)-3-ethyl-6-(1-hydroxyethyl)-3a,6a-dihydro-4*H*-pyrrolo[2,3-*d*]isoxazole 2-oxide (3c'a)**

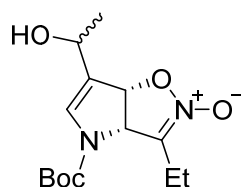

Total 103 mg, 70% yield, dr = 1:1.

Clear oil (50 mg, 35% yield);  $R_f = 0.1$  (3:1 hexanes/AcOEt);  $^1\text{H}$  NMR (600 MHz, Chloroform-*d*)  $\delta$  6.62 (d,  $J = 24.2$  Hz, 1H), 5.98 – 5.73 (m, 1H), 5.61 (d,  $J = 10.0$  Hz, 1H), 4.56 (s, 1H), 2.87 – 2.21 (m, 2H),

1.47 (s, 9H), 1.38 (dd,  $J = 13.9, 6.6$  Hz, 3H), 1.14 (d,  $J = 7.3$  Hz, 3H) ppm;  $^{13}\text{C}$  NMR (101 MHz, Chloroform- $d$ )  $\delta$  150.8, 129.6, 123.8, 116.1, 82.1, 79.1, 66.5, 63.6, 28.1, 22.2, 19.0, 9.3 ppm; IR (film)  $\nu_{\text{max}}$  3223, 1696, 1401, 1048, 904  $\text{cm}^{-1}$ ; HRMS (ESI-TOF)  $m/z$ :  $[\text{M} + \text{H}]^+$  Calcd for  $\text{C}_{14}\text{H}_{23}\text{N}_2\text{O}_5$  299.1601; Found 299.1603.

Clear oil (53 mg, 35% yield);  $R_f = 0.1$  (3:1 hexanes/AcOEt);  $^1\text{H}$  NMR (400 MHz, Chloroform- $d$ )  $\delta$  6.95 – 6.73 (m, 1H), 5.49 (d,  $J = 22.1$  Hz, 1H), 5.18 – 5.04 (m, 1H), 4.15 – 3.77 (m, 1H), 2.65 – 2.42 (m, 2H), 1.52 (s, 9H), 1.15 (q,  $J = 7.5, 6.6$  Hz, 6H) ppm.

**6-(Acetoxymethyl)-4-(tert-butoxycarbonyl)-3-ethyl-3a,6a-dihydro-4H-pyrrolo[2,3- $d$ ]isoxazole 2-oxide (3d'a)**

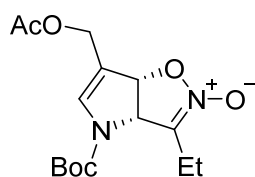

Clear oil (93 mg, 57% yield);  $R_f = 0.2$  (5:1 hexanes/AcOEt);  $^1\text{H}$  NMR (600 MHz, Chloroform- $d$ )  $\delta$  6.83 (d,  $J = 92.0$  Hz, 1H), 5.74 (dd,  $J = 36.3, 9.9$  Hz, 1H), 5.59 (dd,  $J = 32.8, 10.2$  Hz, 1H), 4.72 (dd,  $J = 13.1, 2.9$  Hz, 1H), 4.60 (d,  $J = 13.0$  Hz, 1H), 2.54 – 2.40 (m, 2H), 2.03 (d,  $J = 2.9$  Hz, 3H), 1.46 (s, 9H), 1.11 (t,  $J = 6.3$  Hz, 3H) ppm;  $^{13}\text{C}$  NMR (151 MHz, Chloroform- $d$ )  $\delta$  170.6, 150.5, 134.0, 115.3, 114.6, 82.5, 78.8, 66.5, 58.1, 28.0, 20.8, 19.0, 9.3 ppm; IR (film)  $\nu_{\text{max}}$  1745, 1566, 1203, 748, 694  $\text{cm}^{-1}$ ; HRMS (ESI-TOF)  $m/z$ :  $[\text{M} + \text{H}]^+$  Calcd for  $\text{C}_{15}\text{H}_{22}\text{N}_2\text{O}_6$  327.1551; Found 327.1555.

**4-(tert-Butoxycarbonyl)-3-ethyl-6-phenyl-3a,6a-dihydro-4H-pyrrolo[2,3- $d$ ]isoxazole 2-oxide (3e'a)**

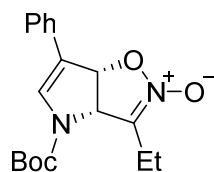

White solid (48 mg, 29% yield);  $R_f = 0.2$  (5:1 hexanes/AcOEt); m.p. 133.1–135.0  $^{\circ}\text{C}$ ;  $^1\text{H}$  NMR (600 MHz, Chloroform- $d$ )  $\delta$  7.43 – 7.36 (m, 2H), 7.31 (t,  $J = 7.7$  Hz, 2H), 7.22 (t,  $J = 7.4$  Hz, 1H), 7.09 (s, 1H), 6.10 (dd,  $J = 34.0, 10.0$  Hz, 1H), 5.71 (dd,  $J = 33.7, 9.9$  Hz, 1H), 2.64 – 2.50 (m, 2H), 1.53 (s, 9H), 1.18 (t,  $J = 7.5$  Hz, 3H) ppm;  $^{13}\text{C}$  NMR (151 MHz, Chloroform- $d$ )  $\delta$  150.8, 131.7, 128.7, 128.6, 127.4, 125.0, 120.0, 115.5, 82.6, 79.0, 66.4, 28.2, 19.2, 9.4 ppm; IR (film)  $\nu_{\text{max}}$  1609, 1366, 1103, 848, 732  $\text{cm}^{-1}$ ; HRMS (ESI-TOF)  $m/z$ :  $[\text{M} + \text{H}]^+$  Calcd for  $\text{C}_{18}\text{H}_{23}\text{N}_2\text{O}_4$  331.1652; Found 331.1655.

**4-(tert-Butoxycarbonyl)-3-ethyl-6-(pyridin-2-yl)-3a,6a-dihydro-4H-pyrrolo[2,3- $d$ ]isoxazole 2-**

**oxide (3f'a)**

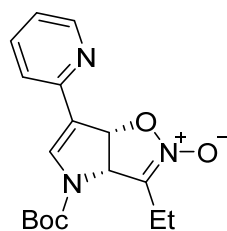

White solid (28 mg, 17% yield);  $R_f = 0.1$  (3:1 hexanes/AcOEt); m.p. 136.1–138.0 °C;  $^1\text{H NMR}$  (400 MHz, Chloroform-*d*)  $\delta$  8.54 (d,  $J = 4.9$  Hz, 1H), 7.62 (dd,  $J = 15.9, 8.0$  Hz, 1H), 7.26 (s, 1H), 7.12 (s, 1H), 6.18 (d,  $J = 9.8$  Hz, 1H), 5.81 (d,  $J = 9.8$  Hz, 1H), 2.66 – 2.48 (m, 2H), 1.54 (s, 9H), 1.19 (t,  $J = 7.3$  Hz, 3H) ppm;  $^{13}\text{C NMR}$  (101 MHz, Chloroform-*d*)  $\delta$  151.3, 150.7, 149.6, 136.6, 132.9, 121.7, 120.4, 120.0, 115.4, 83.0, 78.1, 67.0, 28.2, 19.2, 9.4 ppm; IR (film)  $\nu_{\text{max}}$  1713, 1636, 1389, 1311, 1165, 795  $\text{cm}^{-1}$ ; HRMS (ESI-TOF)  $m/z$ :  $[\text{M} + \text{H}]^+$  Calcd for  $\text{C}_{17}\text{H}_{22}\text{N}_3\text{O}_4$  332.1605; Found 332.1610.

**4-(tert-Butoxycarbonyl)-3-ethyl-6-(pyridin-2-yl)-3a,6a-dihydro-4H-pyrrolo[2,3-d]isoxazole 2-oxide (3g'a)**

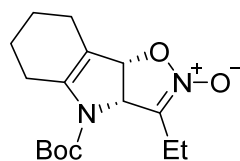

Clear oil (140 mg, 91% yield);  $R_f = 0.2$  (7:1 hexanes/AcOEt);  $^1\text{H NMR}$  (600 MHz, Chloroform-*d*)  $\delta$  5.59 (d,  $J = 9.5$  Hz, 1H), 5.52 – 5.40 (m, 1H), 2.51 (dd,  $J = 14.0, 7.3$  Hz, 2H), 2.45 – 2.30 (m, 2H), 2.27 – 2.15 (m, 1H), 1.99 – 1.91 (m, 1H), 1.81 – 1.64 (m, 2H), 1.60 – 1.50 (m, 2H), 1.47 (s, 9H), 1.12 (t,  $J = 7.5$  Hz, 3H) ppm;  $^{13}\text{C NMR}$  (151 MHz, Chloroform-*d*)  $\delta$  151.6, 140.9, 116.3, 116.0, 81.8, 80.0, 66.4, 28.2, 25.2, 22.4, 22.0, 21.6, 18.9, 9.4 ppm; IR (film)  $\nu_{\text{max}}$  1719, 1646, 1350, 1148, 890, 784  $\text{cm}^{-1}$ ; HRMS (ESI-TOF)  $m/z$ :  $[\text{M} + \text{H}]^+$  Calcd for  $\text{C}_{16}\text{H}_{25}\text{N}_2\text{O}_4$  309.1809; Found 309.1818.

**4-(tert-Butoxycarbonyl)-3-ethyl-3a,8b-dihydro-4H-isoxazolo[4,5-*b*]indole 2-oxide (3h'a)**

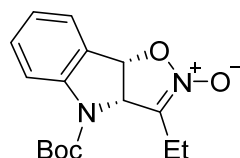

White solid (81 mg, 53% yield);  $R_f = 0.2$  (5:1 hexanes/AcOEt); m.p. 130.8–131.9 °C;  $^1\text{H NMR}$  (600 MHz, Chloroform-*d*)  $\delta$  7.90 – 7.43 (m, 1H), 7.37 (d,  $J = 7.5$  Hz, 1H), 7.33 (t,  $J = 7.8$  Hz, 1H), 7.05 (t,  $J = 7.5$  Hz, 1H), 6.08 (d,  $J = 9.4$  Hz, 1H), 5.90 (s, 1H), 3.07 – 2.21 (m, 2H), 1.57 (s, 9H), 1.13 (t,  $J = 7.5$  Hz, 3H) ppm;  $^{13}\text{C NMR}$  (151 MHz, Chloroform-*d*)  $\delta$  141.3, 131.0, 127.7, 126.3, 123.8, 116.2, 82.8, 67.8,

28.2, 18.9, 9.3 ppm; IR (film)  $\nu_{max}$  3010, 1460, 1390, 1304, 1290, 720  $\text{cm}^{-1}$ ; HRMS (ESI-TOF)  $m/z$ :  $[\text{M} + \text{H}]^+$  Calcd for  $\text{C}_{16}\text{H}_{21}\text{N}_2\text{O}_4$  305.1496; Found 305.1501.

**4-(*tert*-Butoxycarbonyl)-3-methyl-3a,6a-dihydro-4*H*-pyrrolo[2,3-*d*]isoxazole 2-oxide (3ab)**

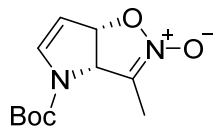

White solid (88 mg, 74% yield);  $R_f = 0.3$  (5:1 hexanes/AcOEt); m.p. 131.1–132.0  $^{\circ}\text{C}$ ;  $^1\text{H}$  NMR (600 MHz, Chloroform-*d*)  $\delta$  6.85 (d,  $J = 98.0$  Hz, 1H), 5.82 (t,  $J = 19.3$  Hz, 1H), 5.66 – 5.33 (m, 1H), 5.22 (d,  $J = 37.8$  Hz, 1H), 2.09 (s, 3H), 1.50 (s, 9H) ppm;  $^{13}\text{C}$  NMR (151 MHz, Chloroform-*d*)  $\delta$  150.6, 135.1, 111.4, 105.6, 82.2, 79.4, 66.6, 28.1, 28.0, 11.4 ppm; IR (film)  $\nu_{max}$  1707, 1642, 1370, 1171, 895, 765  $\text{cm}^{-1}$ ; HRMS (ESI-TOF)  $m/z$ :  $[\text{M} + \text{H}]^+$  Calcd for  $\text{C}_{11}\text{H}_{17}\text{N}_2\text{O}_4$  241.1183; Found 241.1185.

**3-Benzyl-4-(*tert*-butoxycarbonyl)-3a,6a-dihydro-4*H*-pyrrolo[2,3-*d*]isoxazole 2-oxide (3ac)**

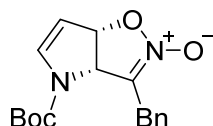

White solid (35 mg, 22% yield);  $R_f = 0.2$  (5:1 hexanes/AcOEt); m.p. 111.3–113.0  $^{\circ}\text{C}$ ;  $^1\text{H}$  NMR (400 MHz, Chloroform-*d*)  $\delta$  7.41 (d,  $J = 7.2$  Hz, 2H), 7.27 (dt,  $J = 17.7, 7.3$  Hz, 3H), 6.74 (s, 1H), 5.77 (d,  $J = 9.7$  Hz, 1H), 5.60 (d,  $J = 9.8$  Hz, 1H), 5.19 (s, 1H), 3.83 (s, 2H), 1.44 (s, 9H) ppm;  $^{13}\text{C}$  NMR (101 MHz, Chloroform-*d*)  $\delta$  150.6, 135.5, 135.3, 128.8, 128.6, 126.9, 113.6, 105.8, 82.2, 79.8, 65.7, 30.9, 28.1 ppm; IR (film)  $\nu_{max}$  1705, 1636, 1381, 1357, 1142, 718  $\text{cm}^{-1}$ ; HRMS (ESI-TOF)  $m/z$ :  $[\text{M} + \text{H}]^+$  Calcd for  $\text{C}_{17}\text{H}_{21}\text{N}_2\text{O}_4$  317.1495; Found 317.1495.

**4-(*tert*-Butoxycarbonyl)-3-(2-((tetrahydro-2*H*-pyran-2-yl)oxy)ethyl)-3a,6a-dihydro-4*H*-pyrrolo[2,3-*d*]isoxazole 2-oxide (3ad)**

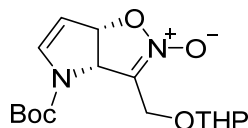

Yellow oil (97 mg, 57% yield);  $R_f = 0.1$  (3:1 hexanes/AcOEt);  $^1\text{H}$  NMR (600 MHz, Chloroform-*d*)  $\delta$  6.80 (s, 1H), 5.99 – 5.54 (m, 2H), 5.19 (s, 1H), 4.83 – 4.24 (m, 4H), 4.09 – 3.28 (m, 3H), 2.11 – 1.69 (m, 4H), 1.48 (s, 11H) ppm;  $^{13}\text{C}$  NMR (101 MHz, Chloroform-*d*)  $\delta$  150.5, 135.7, 105.1, 99.2, 99.0, 82.2, 80.2, 65.23, 61.9, 59.7, 30.3, 28.1, 25.2, 19.0 ppm; IR (film)  $\nu_{max}$  1731, 1636, 1450, 1269, 1241, 1098, 813, 780  $\text{cm}^{-1}$ ; HRMS (ESI-TOF)  $m/z$ :  $[\text{M} + \text{H}]^+$  Calcd for  $\text{C}_{17}\text{H}_{27}\text{N}_2\text{O}_6$  355.1863; Found 355.1853.



**4-(tert-Butoxycarbonyl)-3-(3-oxopentyl)-3a,6a-dihydro-4H-pyrrolo[2,3-d]isoxazole 2-oxide (3ae)**

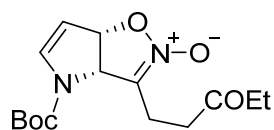

Yellow oil (62 mg, 40% yield);  $R_f = 0.1$  (3:1 hexanes/AcOEt);  $^1\text{H NMR}$  (400 MHz, Chloroform-*d*)  $\delta$  6.77 (s, 1H), 5.79 (d,  $J = 11.1$  Hz, 1H), 5.66 (d,  $J = 9.7$  Hz, 1H), 5.18 (s, 1H), 3.32 – 2.88 (m, 2H), 2.71 (ddd,  $J = 41.4, 16.2, 7.0$  Hz, 2H), 2.43 (qd,  $J = 7.4, 2.6$  Hz, 2H), 1.47 (s, 9H), 1.03 (t,  $J = 7.3$  Hz, 3H) ppm;  $^{13}\text{C NMR}$  (101 MHz, Chloroform-*d*)  $\delta$  209.5, 150.8, 135.4, 114.2, 105.6, 82.3, 79.9, 66.4, 36.3, 35.5, 28.1, 19.8, 7.7 ppm; IR (film)  $\nu_{\text{max}}$  1730, 1715, 1670, 1483, 1362, 1242, 740  $\text{cm}^{-1}$ ; HRMS (ESI-TOF)  $m/z$ :  $[\text{M} + \text{H}]^+$  Calcd for  $\text{C}_{15}\text{H}_{23}\text{N}_2\text{O}_5$  311.1601; Found 311.1598.

**4-(tert-Butoxycarbonyl)-3-(3-methoxy-3-oxopropyl)-3a,6a-dihydro-4H-pyrrolo[2,3-d]isoxazole 2-oxide (3af)**

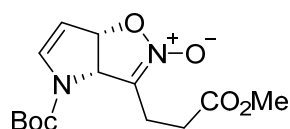

Yellow oil (84 mg, 54% yield);  $R_f = 0.1$  (3:1 hexanes/AcOEt);  $^1\text{H NMR}$  (400 MHz, Chloroform-*d*)  $\delta$  6.99 – 6.71 (m, 1H), 5.81 (d,  $J = 9.8$  Hz, 1H), 5.64 (d,  $J = 9.7$  Hz, 1H), 5.19 (s, 1H), 3.67 (s, 3H), 2.92 – 2.70 (m, 3H), 2.55 (d,  $J = 17.2$  Hz, 1H), 1.48 (s, 9H) ppm;  $^{13}\text{C NMR}$  (101 MHz, Chloroform-*d*)  $\delta$  172.5, 150.7, 135.4, 113.4, 105.5, 82.3, 79.9, 66.1, 51.7, 28.5, 28.0, 20.8 ppm; IR (film)  $\nu_{\text{max}}$  1735, 1448, 1330, 1275, 1140, 540  $\text{cm}^{-1}$ ; HRMS (ESI-TOF)  $m/z$ :  $[\text{M} + \text{H}]^+$  Calcd for  $\text{C}_{14}\text{H}_{21}\text{N}_2\text{O}_6$  313.1399; Found 313.1405.

## 6. Gram-scale reaction

A dry Schlenk tube charged with a stirring bar was evacuated and backfilled with N<sub>2</sub> (three times). *tert*-Butyl 1*H*-pyrrole-1-carboxylate (**1a**, 1.0 g, 6.0 mmol), 1-bromo-1-nitropropane (**2a**, 1.3 mL, 12 mmol), Ag<sub>2</sub>CO<sub>3</sub> (3.3 g, 12.0 mmol) and anhydrous DMSO (20 mL) were added under N<sub>2</sub> atmosphere. The reaction mixture was degassed by freeze-pump-thaw method, and stirred at rt (approximately 25 °C). The reaction was monitored by TLC. Upon completion (12 h), the mixture was diluted with AcOEt and washed with brine (3 × 50 mL), dried over Na<sub>2</sub>SO<sub>4</sub> and concentrated under reduced pressure. The crude product was purified by flash chromatography on silica gel (5:1 hexanes/AcOEt) to give **3aa** (white solid, 1.13 g, 73% yield).

## 7. Conversions of 3aa

### 7.1 Conversions of 3aa

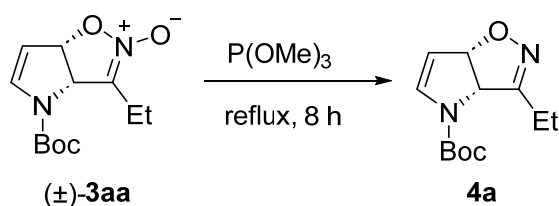

According to a literature procedure<sup>[28]</sup>, a solution of **3aa** (254 mg, 1 mmol) in P(OMe)<sub>3</sub> (3 mL) was stirred in a closed vial at 100 °C for 5 h, diluted with Et<sub>2</sub>O (10 mL), washed with three times with 1 M HCl (3 × 10 mL), once with brine and water, dried over MgSO<sub>4</sub>, and concentrated in vacuo. Purification of the residue by column chromatography on silica gel (10:1 hexanes/AcOEt) gave a yellow oil (225 mg, 95% yield).

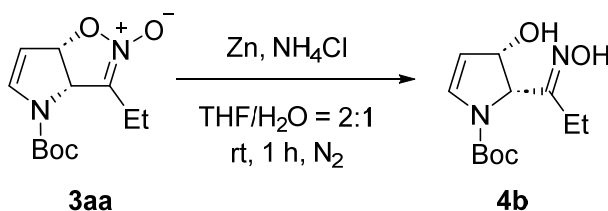

According to a literature procedure<sup>[29]</sup>, **3aa** (41 mg, 0.16 mmol) was added to a solution of NH<sub>4</sub>Cl (26 mg, 0.48 mmol) in THF (2 mL) and water (1 mL) at room temperature. The reaction mixture was stirred for 5 min, and then Zn powder (158 mg, 2.42 mmol) was added in portions. The reaction was stirred at room temperature for 1 h. At the end, the reaction mixture was concentrated under vacuum, and the

residue was purified by chromatography on silica gel (2:1 hexanes/AcOEt) to give the product (clear oil, 33 mg, 81% yield).

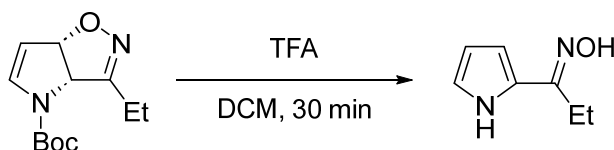

**3aa** (38 mg, 0.16 mmol) was added to a solution of TFA (0.16 mmol) in DCM (2 mL) at room temperature. The reaction mixture was stirred for 30 min, concentrated under vacuum, and purified by chromatography on silica gel (7:1 hexanes/AcOEt) to give the product (white solid, 19 mg, 87% yield).

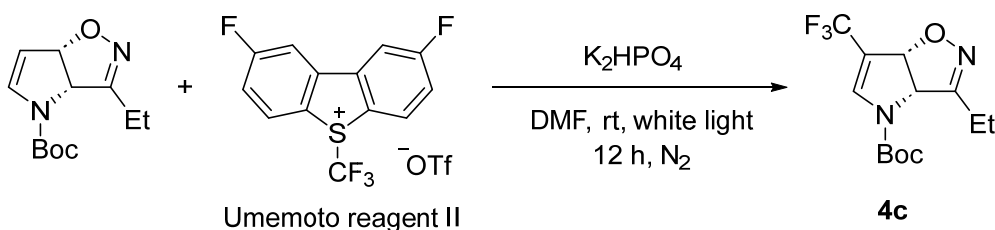

$\text{K}_2\text{HPO}_4$  (174 mg, 1.0 mmol) and Umemoto reagent II (438 mg, 1.0 mmol) were added to a solution of **3aa** (119 mg, 0.5 mmol) in DMF (4 mL). The reaction mixture was stirred under irradiation with white LEDs (approximately 3.0 cm distance from the tube) at room temperature for 12 hours. The mixture was extracted with ethyl acetate, washed with saturated brine, dried over  $\text{MgSO}_4$ , filtered, and concentrated in vacuo. Purification by chromatography on silica gel (10:1 hexanes/AcOEt) gave the product (clear oil, 92 mg, 60% yield).

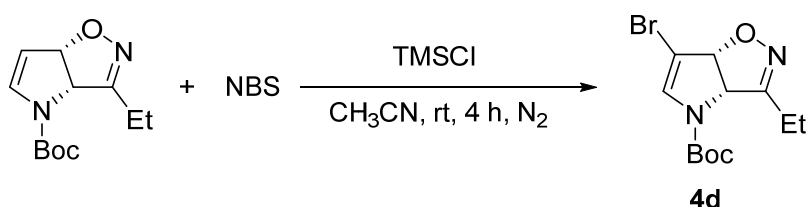

NBS (133 mg, 0.75 mmol) and Trimethylchlorosilane (108 mg, 1.0 mmol) were added in one potion to a solution of **3aa** (119 mg, 0.5 mmol) in  $\text{CH}_3\text{CN}$  (4 mL). The reaction mixture was stirred at room temperature for 4 h, concentrated under vacuum, and purified by chromatography on silica gel (7:1 hexanes/AcOEt) to give the product (clear oil, 142 mg, 90% yield).

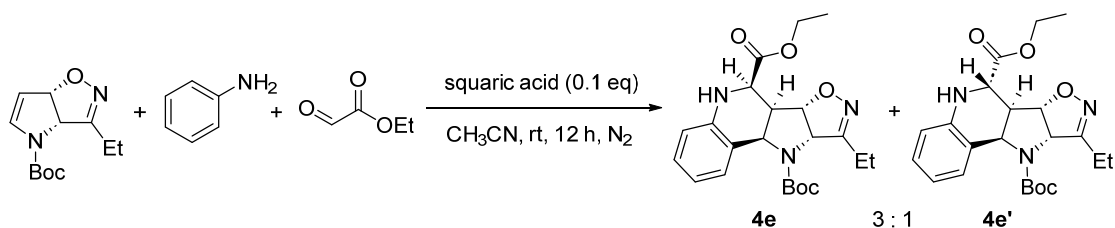

Squaric acid (11 mg, 0.1 mmol), aniline (97 mg, 1.05 mmol) and ethyl glyoxylate solution (102 mg, 1.05 mmol, 50% in toluene) were added to a solution of **3aa** (238 mg, 1 mmol) in CH<sub>3</sub>CN (4 mL). The reaction mixture was stirred under N<sub>2</sub> at room temperature for 12 hours, concentrated in vacuo, and purified by chromatography on silica gel (7:1 hexanes/AcOEt) to give the major isomer (white solid, 232mg, 56% yield) and the minor isomer (white solid, 78mg, 19% yield). The total yield was 75%. The isomer ratio was determined to be 3:1.

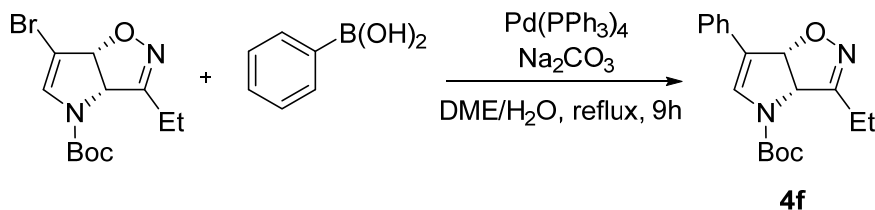

To a stirred solution of the **4d** (0.5 mmol), Phenylboronic acid (72 mg, 0.6 mmol) and tetrakis-(triphenylphosphine)palladium (57 mg, 0.05 mmol) in 1,2-dimethoxyethane (10 mL) at room temperature under argon was added a solution of sodium carbonate (159 mg, 1.5 mmol) in water (5 mL). The mixture was heated at reflux for 9 h, cooled, then partitioned between water (50 mL) and dichloromethane (4 × 20 mL). The combined extracts were dried over Na<sub>2</sub>SO<sub>4</sub> and evaporated in vacuo to give an oil. The residue was purified by flash chromatography on silica gel to give **4f** (110 mg, 71% yield).

## 7.2 Physical data

### *tert*-Butyl 3-ethyl-3a,6a-dihydro-4*H*-pyrrolo[2,3-*d*]isoxazole-4-carboxylate (**4a**)

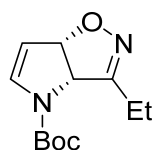

Clear oil (225 mg, 95% yield); *R*<sub>f</sub> = 0.1 (7:1 hexanes/AcOEt); <sup>1</sup>H NMR (400 MHz, Chloroform-*d*) δ 6.83 – 6.37 (m, 1H), 5.67 (t, *J* = 8.4 Hz, 1H), 5.35 (dd, *J* = 31.0, 9.9 Hz, 1H), 5.09 (d, *J* = 15.2 Hz, 1H), 2.33 (m, 2H), 1.38 (s, 9H), 1.11 (t, *J* = 7.4 Hz, 3H) ppm; <sup>13</sup>C NMR (101 MHz, Chloroform-*d*) δ 157.4, 150.7, 132.4, 107.1, 85.2, 81.4, 69.4, 27.9, 20.3, 10.4 ppm; IR (film) *v*<sub>max</sub> 1709, 1393, 1362, 1138, 930 cm<sup>-1</sup>; HRMS (ESI-TOF) *m/z*: [M + H]<sup>+</sup> Calcd for C<sub>12</sub>H<sub>19</sub>N<sub>2</sub>O<sub>3</sub> 239.1390; Found 239.1391.

### *tert*-Butyl 3-hydroxy-2-(1-(hydroxyimino)propyl)-2,3-dihydro-1*H*-pyrrole-1-carboxylate (**4b**)

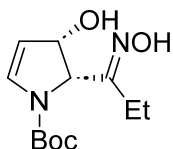

Clear oil (33 mg, 81% yield);  $R_f = 0.1$  (3:1 hexanes/AcOEt);  $^1\text{H NMR}$  (400 MHz, Chloroform-*d*)  $\delta$  9.81 (s, 1H), 6.74 (d,  $J = 61.3$  Hz, 1H), 5.35 – 4.89 (m, 2H), 4.56 (s, 1H), 3.74 (s, 1H), 2.31 (m, 2H), 1.41 (s, 9H), 1.09 (t,  $J = 7.6$  Hz, 3H) ppm;  $^{13}\text{C NMR}$  (151 MHz, Chloroform-*d*)  $\delta$  160.3, 151.5, 150.8, 133.3, 108.9, 81.3, 75.9, 74.9, 63.9, 63.4, 28.3, 28.2, 28.0, 27.8, 21.4, 10.0, 9.6 ppm; IR (film)  $\nu_{\text{max}}$  3391, 1705, 1396, 1146, 1049, 764  $\text{cm}^{-1}$ ; HRMS (ESI-TOF)  $m/z$ :  $[\text{M} + \text{H}]^+$  Calcd for  $\text{C}_{12}\text{H}_{21}\text{N}_2\text{O}_4$  257.1495; Found 257.1493.

### 1-(1H-pyrrol-2-yl)propan-1-one oxime

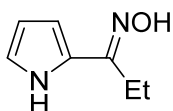

White solid (23 mg, 91% yield);  $R_f = 0.1$  (5:1 hexanes/AcOEt); m.p. 99.1–101.0  $^\circ\text{C}$ ;  $^1\text{H NMR}$  (600 MHz, Chloroform-*d*)  $\delta$  10.63 (s, 1H), 6.97 (q,  $J = 2.3$  Hz, 1H), 6.58 (t,  $J = 2.2$  Hz, 1H), 6.27 (q,  $J = 2.8$  Hz, 1H), 2.63 (q,  $J = 7.5$  Hz, 2H), 1.27 (t,  $J = 7.5$  Hz, 3H) ppm;  $^{13}\text{C NMR}$  (101 MHz, Chloroform-*d*)  $\delta$  149.3, 125.1, 120.9, 113.0, 108.6, 25.8, 12.7 ppm; IR (film)  $\nu_{\text{max}}$  3414, 3237, 1423, 1381, 926, 733  $\text{cm}^{-1}$ ; HRMS (ESI-TOF)  $m/z$ :  $[\text{M} + \text{H}]^+$  Calcd for  $\text{C}_7\text{H}_{11}\text{N}_2\text{O}$  139.0865; Found 139.0864.

### *tert*-Butyl 3-ethyl-6-(trifluoromethyl)-3a,6a-dihydro-4H-pyrrolo[2,3-*d*]isoxazole-4-carboxylate (4c)

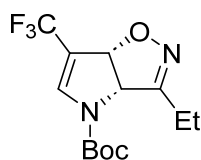

Clear oil (92 mg, 60% yield);  $R_f = 0.2$  (10:1 hexanes/AcOEt);  $^1\text{H NMR}$  (400 MHz, Chloroform-*d*)  $\delta$  7.12 (s, 1H), 5.89 (d,  $J = 10.4$  Hz, 2H), 5.67 (d,  $J = 10.1$  Hz, 1H), 2.48 (td,  $J = 21.1, 18.7, 10.9$  Hz, 2H), 1.53 (s, 9H), 1.25 (t,  $J = 7.4$  Hz, 3H). ppm;  $^{13}\text{C NMR}$  (151 MHz, Chloroform-*d*)  $\delta$  157.2, 150.3, 136.0, 122.6 (q,  $J = 267.2$  Hz), 110.7 (q,  $J = 35.9$  Hz), 83.9, 82.8, 71.8, 28.1, 20.6, 10.7 ppm; HRMS (ESI-TOF)  $m/z$ :  $[\text{M} + \text{H}]^+$  Calcd for  $\text{C}_{13}\text{H}_{17}\text{F}_3\text{N}_2\text{O}_3$  307.1264; Found 307.1261.

### *tert*-Butyl 6-bromo-3-ethyl-3a,6a-dihydro-4H-pyrrolo[2,3-*d*]isoxazole-4-carboxylate (4d)

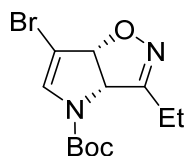

Clear oil (142 mg, 90% yield);  $R_f = 0.1$  (5:1 hexanes/AcOEt);  $^1\text{H NMR}$  (400 MHz, Chloroform-*d*)  $\delta$  6.74 (s, 1H), 5.67 (d,  $J = 10.5$  Hz, 1H), 5.56 (d,  $J = 9.9$  Hz, 1H), 2.70 – 2.16 (m, 2H), 1.50 (s, 9H), 1.23 (t,  $J = 7.4$  Hz, 3H) ppm;  $^{13}\text{C NMR}$  (101 MHz, Chloroform-*d*)  $\delta$  157.9, 150.3, 131.5, 100.4, 86.8, 82.6, 70.3, 28.1, 20.4, 10.6 ppm; IR (film)  $\nu_{\text{max}}$  1740, 1630, 1311, 1356, 1242, 709  $\text{cm}^{-1}$ ; HRMS (ESI-TOF)  $m/z$ :  $[\text{M} + \text{H}]^+$  Calcd for  $\text{C}_{12}\text{H}_{18}\text{BrN}_2\text{O}_3$  317.0495; Found 317.0504.

**10-(*tert*-Butyl) 6-ethyl (6*S*,6*aS*,6*bR*,9*aR*,10*aS*)-9-ethyl-5,6,6*a*,6*b*,9*a*,10*a*-hexahydro-10*H*-isoxazolo[5',4':4,5]pyrrolo[3,2-*c*]quinoline-6,10-dicarboxylate (4e)**

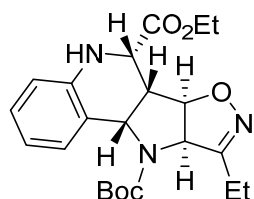

White solid (186 mg, 45% yield);  $R_f = 0.15$  (5:1 hexanes/AcOEt, less polar);  $^1\text{H NMR}$  (600 MHz, Chloroform-*d*)  $\delta$  7.51 (d,  $J = 7.9$  Hz, 1H), 7.08 (t,  $J = 7.6$  Hz, 1H), 6.70 (t,  $J = 7.5$  Hz, 1H), 6.60 (d,  $J = 8.1$  Hz, 1H), 5.50 – 5.04 (m, 3H), 4.77 – 4.08 (m, 4H), 2.97 (d,  $J = 34.1$  Hz, 1H), 2.51 (s, 2H), 1.59 (s, 9H), 1.35 (t,  $J = 7.1$  Hz, 3H), 1.22 (d,  $J = 7.5$  Hz, 3H) ppm;  $^{13}\text{C NMR}$  (101 MHz, Chloroform-*d*)  $\delta$  170.7, 142.4, 129.0, 128.5, 118.6, 115.2, 81.2, 79.7, 79.3, 69.2, 62.0, 55.9, 52.3, 46.0, 28.4, 21.8, 14.1, 11.1 ppm; IR (film)  $\nu_{\text{max}}$  3101, 1750, 1660, 1380, 1377, 1142, 718  $\text{cm}^{-1}$ ; HRMS (ESI-TOF)  $m/z$ :  $[\text{M} + \text{H}]^+$  Calcd for  $\text{C}_{22}\text{H}_{30}\text{N}_3\text{O}_5$  416.2179; Found 416.2187.

**10-(*tert*-Butyl) 6-ethyl (6*R*,6*aS*,6*bR*,9*aR*,10*aS*)-9-ethyl-5,6,6*a*,6*b*,9*a*,10*a*-hexahydro-10*H*-isoxazolo[5',4':4,5]pyrrolo[3,2-*c*]quinoline-6,10-dicarboxylate (4e')**

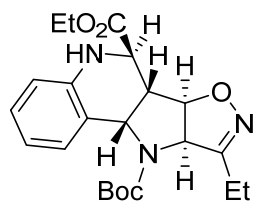

White solid (124 mg, 30% yield);  $R_f = 0.13$  (5:1 hexanes/AcOEt, more polar); m.p. 156.1–158.0  $^{\circ}\text{C}$ ;  $^1\text{H NMR}$  (400 MHz, Chloroform-*d*)  $\delta$  7.57 (s, 1H), 7.17 – 6.98 (m, 1H), 6.77 – 6.66 (m, 1H), 6.60 (dd,  $J = 8.1, 1.2$  Hz, 1H), 5.32 – 4.94 (m, 3H), 4.40 (s, 1H), 4.17 (dq,  $J = 7.2, 3.7$  Hz, 2H), 4.07 (t,  $J = 2.6$  Hz, 1H), 2.88 (td,  $J = 7.4, 3.3$  Hz, 1H), 2.53 (q,  $J = 7.5$  Hz, 2H), 1.55 (s, 9H), 1.24 (td,  $J = 7.2, 2.2$  Hz, 6H) ppm;  $^{13}\text{C NMR}$  (101 MHz, Chloroform-*d*)  $\delta$  172.3, 161.3, 154.6, 142.1, 129.5, 128.9, 119.0, 115.2, 81.8, 81.3, 68.8, 61.7, 52.9, 44.1, 28.4, 21.6, 14.1, 10.9 ppm; HRMS (ESI-TOF)  $m/z$ :  $[\text{M} + \text{H}]^+$  Calcd for  $\text{C}_{22}\text{H}_{30}\text{N}_3\text{O}_5$  416.2179; Found 416.2187.

***tert*-Butyl (3*aS*,6*aS*)-3-ethyl-6-phenyl-3*a*,6*a*-dihydro-4*H*-pyrrolo[2,3-*d*]isoxazole-4-carboxylate (4*f*)**

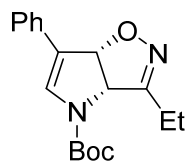

Clear oil (110 mg, 71% yield);  $R_f = 0.3$  (10:1 hexanes/AcOEt);  $^1\text{H NMR}$  (400 MHz, Chloroform-*d*)  $\delta$  7.48 (d,  $J = 7.8$  Hz, 2H), 7.32 (t,  $J = 7.6$  Hz, 2H), 7.24 – 7.14 (m, 2H), 6.10 (dd,  $J = 15.9, 9.8$  Hz, 1H), 5.61 (dd,  $J = 40.4, 9.9$  Hz, 1H), 2.50 (tt,  $J = 16.9, 8.3$  Hz, 2H), 1.55 (s, 9H), 1.26 (t,  $J = 7.4$  Hz, 3H) ppm;  $^{13}\text{C NMR}$  (101 MHz, Chloroform-*d*)  $\delta$  158.0, 151.0, 132.3, 128.6, 127.0, 126.4, 125.1, 121.2, 85.0, 82.2, 70.2, 28.2, 20.5, 10.7 ppm; IR (film)  $\nu_{\text{max}}$  1740, 1370, 1270, 1180, 701  $\text{cm}^{-1}$ ; HRMS (ESI-TOF)  $m/z$ :  $[\text{M} + \text{H}]^+$  Calcd for  $\text{C}_{18}\text{H}_{23}\text{N}_2\text{O}_3$  315.1703; Found 315.1698.

## 8. Mechanism experiments

### 8.1 Radical trapping experiment using TEMPO

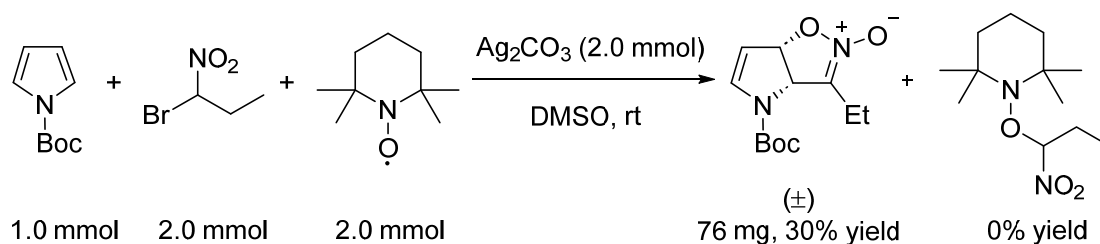

A dry Schlenk tube charged with a stirring bar was evacuated and backfilled with  $\text{N}_2$  (three times). 1-Boc-pyrrole (**1a**, 1.00 mmol, 167 mg), 1-bromo-1-nitropropane (**2a**, 2.0 mmol, 0.20 mL), TEMPO (2.00 mmol, 312 mg),  $\text{Ag}_2\text{CO}_3$  (2.00 mmol, 551 mg) and anhydrous DMSO (6.0 mL) were added under  $\text{N}_2$  atmosphere. After stirring at rt under  $\text{N}_2$  for 12 h, the mixture was diluted with AcOEt, washed with brine ( $3 \times 50$  mL), dried over  $\text{Na}_2\text{SO}_4$ , and concentrated under reduced pressure. The crude product was purified by flash chromatography on silica gel (5:1 hexanes/AcOEt) to give **3aa** (76 mg, 30% yield).

## 8.2 Powder X-ray diffraction spectrum

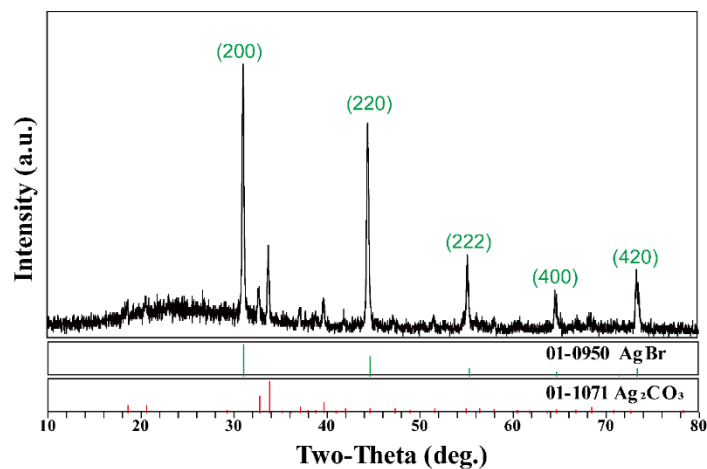

Figure S1 XRD patterns of the precipitate in the mechanism experiment.

## 9. DFT calculations

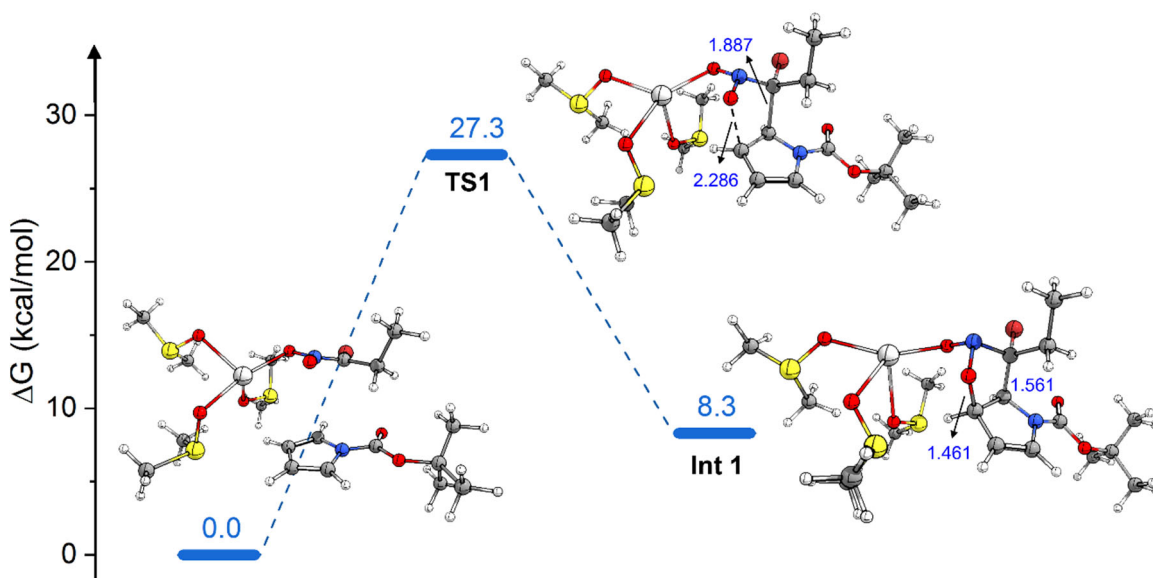

Figure S2. Free energy profile for the [3+2] cycloaddition between **1a** and the Ag(I) nitronate of **2a**. Three explicit DMSO molecules and implicit PCM model are included to account for the solvent effect. Energies and selected bond distances are given in kcal/mol and angstrom, respectively.



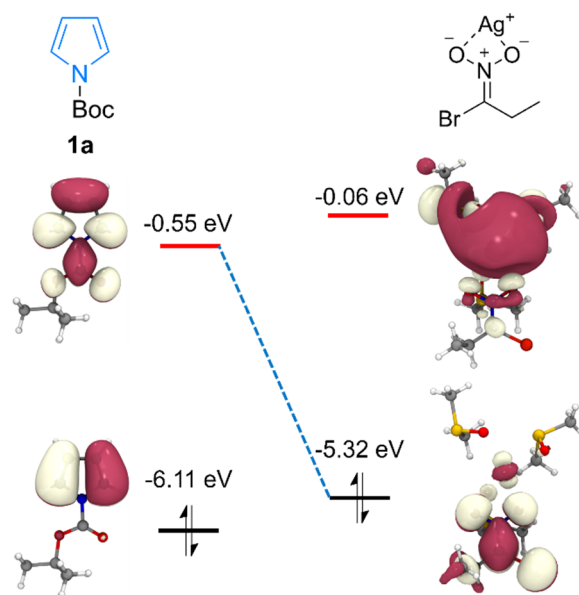

**Figure S3.** The HOMO and LUMO orbitals along with their energies (in eV) of **1a** and the Ag(I) nitronate of **2a** calculated at the B3LYP-D3/6-31G\*&SDD level. Three DMSO coordinate with the Ag<sup>+</sup>.

## 10. Unsuccessful reactants

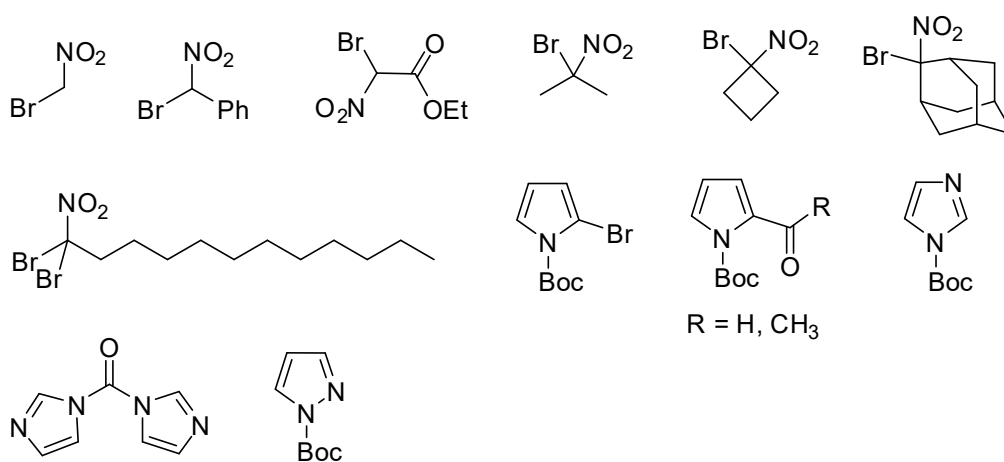

## 11. Crystal data

CCDC numbers: 2268832 (**3aa**); 2268866 (**3ia**); 2306811 (**3e'a**); 2306810 (**4e'**).

Single crystals of **3aa**, **3ia**, **3e'a** and **4e'** were obtained by layering an ethyl acetate solution with *n*-hexane and subsequent slow evaporation of the solvents at rt. The ellipsoid contour probability level is 50%.

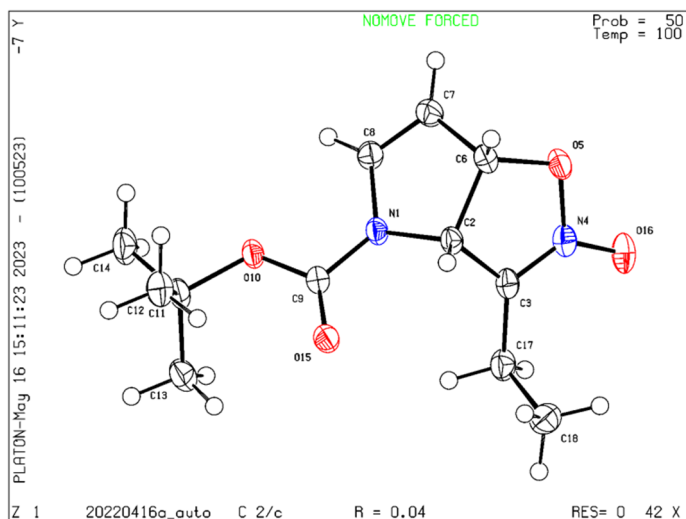


---

**Crystal data and structure refinement for 3aa.**

---

|                                             |                                        |
|---------------------------------------------|----------------------------------------|
| Temperature/K                               | 100(2)                                 |
| Crystal system                              | monoclinic                             |
| Space group                                 | C2/c                                   |
| a/Å                                         | 23.2511(5)                             |
| b/Å                                         | 6.0802(7)                              |
| c/Å                                         | 18.4786(9)                             |
| $\alpha$ /°                                 | 90                                     |
| $\beta$ /°                                  | 97.790(3)                              |
| $\gamma$ /°                                 | 90                                     |
| Volume/Å <sup>3</sup>                       | 2588.2(3)                              |
| Z                                           | 8                                      |
| $\rho_{\text{calc}}/\text{cm}^3$            | 1.305                                  |
| $\mu/\text{mm}^{-1}$                        | 0.820                                  |
| F(000)                                      | 1088.0                                 |
| Crystal size/mm <sup>3</sup>                | 0.500 × 0.500 × 0.200                  |
| Radiation                                   | CuK $\alpha$ ( $\lambda$ = 1.54184)    |
| 2 $\theta$ range for data collection/°      | 7.676 to 152.408                       |
| Index ranges                                | -28 ≤ h ≤ 28, -5 ≤ k ≤ 7, -23 ≤ l ≤ 21 |
| Reflections collected                       | 12333                                  |
| Independent reflections                     | 2612 [Rint = 0.0436, Rsigma = 0.0283]  |
| Data/restraints/parameters                  | 2612/0/168                             |
| Goodness-of-fit on F <sup>2</sup>           | 1.052                                  |
| Final R indexes [I >= 2 $\sigma$ (I)]       | R1 = 0.0392, wR2 = 0.1039              |
| Final R indexes [all data]                  | R1 = 0.0434, wR2 = 0.1070              |
| Largest diff. peak/hole / e Å <sup>-3</sup> | 0.25/-0.23                             |

---

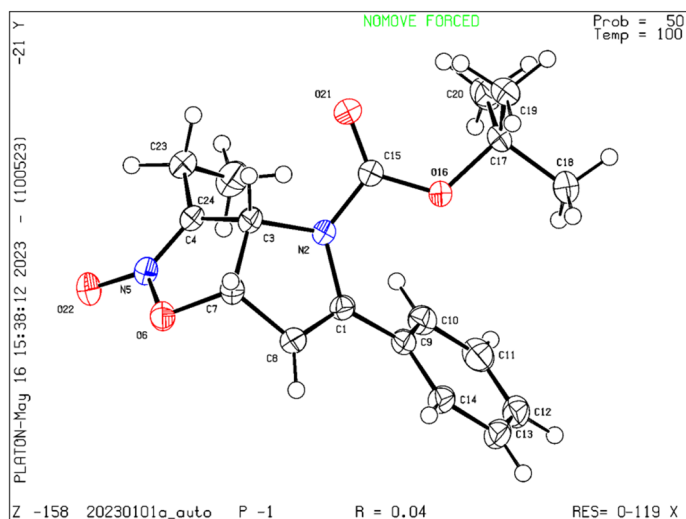


---

Crystal data and structure refinement for **3ia**.

---

|                                             |                                          |
|---------------------------------------------|------------------------------------------|
| Temperature/K                               | 100(2)                                   |
| Crystal system                              | triclinic                                |
| Space group                                 | P-1                                      |
| a/Å                                         | 9.5021(8)                                |
| b/Å                                         | 9.6751(5)                                |
| c/Å                                         | 10.0293(9)                               |
| $\alpha$ /°                                 | 77.914(6)                                |
| $\beta$ /°                                  | 71.586(8)                                |
| $\gamma$ /°                                 | 89.936(6)                                |
| Volume/Å <sup>3</sup>                       | 853.33(12)                               |
| Z                                           | 2                                        |
| $\rho_{\text{calc}}/\text{cm}^3$            | 1.286                                    |
| $\mu/\text{mm}^{-1}$                        | 0.749                                    |
| F(000)                                      | 352.0                                    |
| Crystal size/mm <sup>3</sup>                | 0.100 × 0.100 × 0.100                    |
| Radiation                                   | CuK $\alpha$ ( $\lambda$ = 1.54184)      |
| 2 $\theta$ range for data collection/°      | 9.372 to 151.894                         |
| Index ranges                                | -11 ≤ h ≤ 11, -11 ≤ k ≤ 11, -12 ≤ l ≤ 12 |
| Reflections collected                       | 22766                                    |
| Independent reflections                     | 3413 [Rint = 0.0860, Rsigma = 0.0477]    |
| Data/restraints/parameters                  | 3413/0/222                               |
| Goodness-of-fit on F <sup>2</sup>           | 1.064                                    |
| Final R indexes [I ≥ 2 $\sigma$ (I)]        | R1 = 0.0439, wR2 = 0.1074                |
| Final R indexes [all data]                  | R1 = 0.0581, wR2 = 0.1147                |
| Largest diff. peak/hole / e Å <sup>-3</sup> | 0.19/-0.21                               |

---

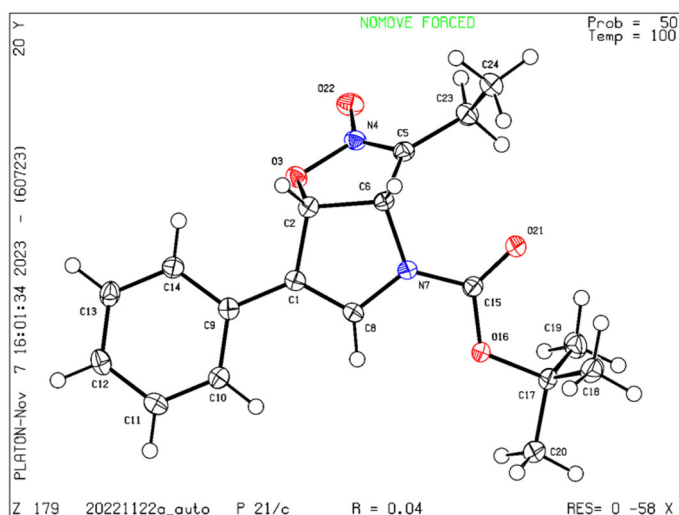


---

Crystal data and structure refinement for **3e'a**.

---

|                                               |                                                              |
|-----------------------------------------------|--------------------------------------------------------------|
| Temperature/K                                 | 100(2)                                                       |
| Crystal system                                | monoclinic                                                   |
| Space group                                   | $P2_1/c$                                                     |
| $a/\text{\AA}$                                | 15.1005(18)                                                  |
| $b/\text{\AA}$                                | 9.9090(10)                                                   |
| $c/\text{\AA}$                                | 11.5159(15)                                                  |
| $\alpha/^\circ$                               | 90                                                           |
| $\beta/^\circ$                                | 93.934(11)                                                   |
| $\gamma/^\circ$                               | 90                                                           |
| Volume/ $\text{\AA}^3$                        | 1719.1(4)                                                    |
| Z                                             | 4                                                            |
| $\rho_{\text{calc}}/\text{cm}^3$              | 1.269                                                        |
| $\mu/\text{mm}^{-1}$                          | 0.724                                                        |
| F(000)                                        | 700.0                                                        |
| Crystal size/ $\text{mm}^3$                   | 0.150 × 0.100 × 0.100                                        |
| Radiation                                     | $\text{CuK}\alpha$ ( $\lambda = 1.54184$ )                   |
| $2\theta$ range for data collection/ $^\circ$ | 10.686 to 153.67                                             |
| Index ranges                                  | $-19 \leq h \leq 19, -11 \leq k \leq 12, -14 \leq l \leq 13$ |
| Reflections collected                         | 23697                                                        |
| Independent reflections                       | 3496 [Rint = 0.0780, Rsigma = 0.0496]                        |
| Data/restraints/parameters                    | 3496/0/222                                                   |
| Goodness-of-fit on F2                         | 1.050                                                        |
| Final R indexes [ $I \geq 2\sigma(I)$ ]       | R1 = 0.0390, wR2 = 0.0949                                    |
| Final R indexes [all data]                    | R1 = 0.0491, wR2 = 0.1004                                    |
| Largest diff. peak/hole / $e \text{\AA}^{-3}$ | 0.24/-0.21                                                   |

---

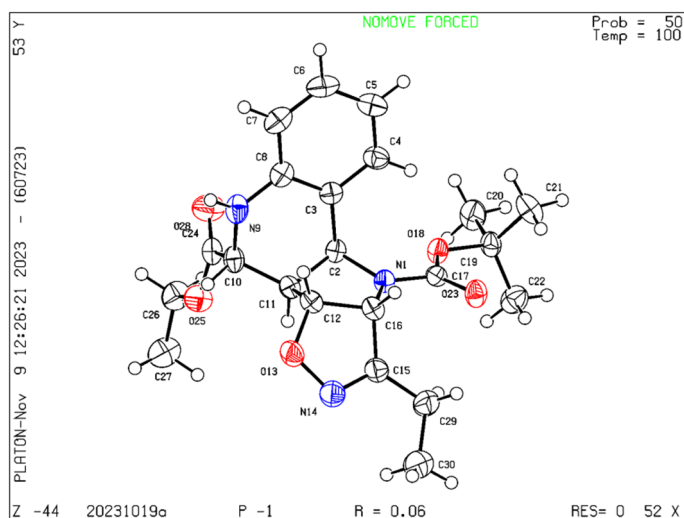


---

Crystal data and structure refinement for **4e'**.

---

|                                             |                                          |
|---------------------------------------------|------------------------------------------|
| Temperature/K                               | 100(2)                                   |
| Crystal system                              | triclinic                                |
| Space group                                 | P-1                                      |
| a/Å                                         | 9.6012(7)                                |
| b/Å                                         | 10.4718(6)                               |
| c/Å                                         | 11.4984(9)                               |
| $\alpha$ /°                                 | 86.861(6)                                |
| $\beta$ /°                                  | 70.637(7)                                |
| $\gamma$ /°                                 | 79.609(5)                                |
| Volume/Å <sup>3</sup>                       | 1072.78(14)                              |
| Z                                           | 2                                        |
| $\rho$ calcg/cm <sup>3</sup>                | 1.286                                    |
| $\mu$ /mm <sup>-1</sup>                     | 0.092                                    |
| F(000)                                      | 444.0                                    |
| Crystal size/mm <sup>3</sup>                | 0.3 × 0.2 × 0.2                          |
| Radiation                                   | MoK $\alpha$ ( $\lambda$ = 0.71073)      |
| 2 $\theta$ range for data collection/°      | 7.404 to 59.594                          |
| Index ranges                                | -13 ≤ h ≤ 13, -13 ≤ k ≤ 14, -14 ≤ l ≤ 15 |
| Reflections collected                       | 9167                                     |
| Independent reflections                     | 4892 [Rint = 0.0487, Rsigma = 0.0692]    |
| Data/restraints/parameters                  | 4892/0/276                               |
| Goodness-of-fit on F <sup>2</sup>           | 1.041                                    |
| Final R indexes [ $I \geq 2\sigma(I)$ ]     | R1 = 0.0622, wR2 = 0.1522                |
| Final R indexes [all data]                  | R1 = 0.0831, wR2 = 0.1740                |
| Largest diff. peak/hole / e Å <sup>-3</sup> | 0.38/-0.37                               |

---

## 12. References

- [1] Kamlar, M.; Hybelbauerová, S.; Císařová, I.; Veselý, J. Organocatalytic enantioselective allylic alkylation of MBH carbonates with  $\beta$ -keto esters. *Org Biomol Chem.*, **2014**, *12*, 5071.
- [2] Smith, N. D.; Huang, D.; Cosford, N. D. P. One-step Synthesis of 3-aryl- and 3,4-diaryl-(1*H*)-pyrroles using Tosylmethyl isocyanide (TOSMIC). *Org Lett.*, **2002**, *4*, 3537-3539.
- [3] Johnson, C. N.; Stempa, G.; Anandb, N.; Stephenb, S. C.; Gallagherb, T. Palladium (0)-catalysed arylations using pyrrole and indole 2-boronic acids. *Synlett.*, **1998**, *29*, 1025-1027.
- [4] Hodgson, D. M.; Bebbington, M. W. P.; Willis, P. Development of two processes for the synthesis of bridged azabicyclic systems: intermolecular radical addition-homoallylic rearrangements leading to 2-azanorborn-5-enes and neophyl-type radical rearrangements to 2-azabenzonorbornanes. *Org Biomol Chem.*, **2003**, *1*, 3787-3798.
- [5] Cartwright, K. C.; Tunge, J. A. Organophotoredox/palladium dual catalytic decarboxylative Csp<sup>3</sup>–Csp<sup>3</sup> coupling of carboxylic acids and  $\pi$ -electrophiles. *Chem. Sci.*, **2020**, *11*, 8167-8175.
- [6] D'Silva, C.; Iqbal, R. A new method to *N*-(arylmethyl)pyrroles from *N*-acylpyrroles. *Synthesis (Stuttg.)*, **1996**, 457-458.
- [7] Marcos Atanes, D.; Vidal, C.; Navo, C. D.; Peccati, F.; Jiménez Osés, G.; Mascareñas, J. L. Iridium-catalyzed ortho-selective borylation of aromatic amides enabled by 5-trifluoromethylated bipyridine ligands. *Angew. Chem. Int. Ed.*, **2023**, *62*, e202214510.
- [8] Sreedharan, R.; Gandhi, T. Brønsted base prompted sp<sup>3</sup>C–H latent nucleophiles to access  $\alpha$ -branched amines bearing  $\beta$ -carbonyl by cleaving amide and ester bonds. *J. Org Chem.*, **2023**, *88*, 8480-8492.
- [9] Chen, H.; Chen, D.; Huang, P. Ni-catalyzed direct alcoholysis of *N*-acylpyrrole-type tertiary amides under mild conditions. *Sci. Chi. Chem*, **2020**, *63*, 370-376.
- [10] Yilmaz, R. F.; Derin, Y.; Misir, B. A.; Atalay, V. E.; Tutar, Ö. F.; Ökten, S.; Tutar, A. Synthesis and spectral properties of symmetrically arylated BODIPY dyes: Experimental and computational approach. *J. Mol Struct.*, **2023**, *1291*, 135962.
- [11] Maeda, H.; Haketa, Y.; Nakanishi, T. Aryl-substituted C<sub>3</sub>-bridged oligopyrroles as anion receptors for formation of supramolecular organogels. *J. Am. Chem. Soc.*, **2007**, *129*, 13661-13674.
- [12] Janaagal, A.; Sanyam; Mondal, A.; Gupta, I. Robust zinc(II)porphyrin catalyst for visible light induced C–H arylation of heteroarenes. *J. Org Chem.*, **2023**, *88*, 9424-9431.
- [13] Michelet, B.; Deldaele, C.; Kajouj, S.; Moucheron, C.; Evano, G. A general copper catalyst for photoredox transformations of organic halides. *Org Lett.*, **2017**, *19*, 3576-3579.
- [14] Belov, D. S.; Ivanov, V. N.; Curreli, F.; Kurkin, A. V.; Altieri, A.; Debnath, A. K. Synthesis of 5-arylpyrrole-2-carboxylic acids as key intermediates for NBD series HIV-1 entry inhibitors. *Synthesis (Stuttgart)*, **2017**, *49*, 3692-3699.
- [15] Zhang, S.; Tang, Z.; Bao, W.; Li, J.; Guo, B.; Huang, S.; Zhang, Y.; Rao, Y. Perylenequinonoid-catalyzed photoredox activation for the direct arylation of (het)arenes with sunlight. *Org Biomol Chem.*, **2019**, *17*, 4364-4369.
- [16] Arnold, J.; Scott, P. d0 Organometallics in catalysis. *Dalton Trans.*, **2011**, *40*, 7665.
- [17] Michelet, B.; Deldaele, C.; Kajouj, S.; Moucheron, C.; Evano, G. A general copper catalyst for photoredox transformations of organic halides. *Org Lett.*, **2017**, *19*, 3576-3579.
- [18] Zweig, J. E.; Ko, T. A.; Huang, J.; Newhouse, T. R. Effects of  $\pi$ -extension on pyrrole hemithioindigo photoswitches. *Tetrahedron.*, **2019**, *75*, 130466.
- [19] Billingsley, K.; Buchwald, S. L. Highly efficient monophosphine-based catalyst for the palladium-catalyzed Suzuki–Miyaura reaction of heteroaryl halides and heteroaryl boronic acids and esters. *J. Am.*

*Chem. Soc.*, **2007**, *129*, 3358-3366.

[20] Curreli, F.; Ahmed, S.; Benedict Victor, S. M.; Iusupov, I. R.; Belov, D. S.; Markov, P. O.; Kurkin, A. V.; Altieri, A.; Debnath, A. K. Preclinical optimization of gp120 entry antagonists as anti-HIV-1 agents with improved cytotoxicity and ADME properties through rational design, synthesis, and antiviral evaluation. *J. Med Chem.*, **2020**, *63*, 1724-1749.

[21] Maity, P.; Kundu, D.; Ranu, B. C. Visible-light-photocatalyzed metal-free C–H heteroarylation of heteroarenes at room temperature: A sustainable synthesis of biheteroaryls. *European J. Org Chem.*, **2015**, *2015*, 1727-1734.

[22] Komine, K.; Lambert, K. M.; Savage, Q. R.; Cox, J. B.; Wood, J. L. Synthetic studies toward longeracemine: a SmI<sub>2</sub>-mediated spirocyclization and rearrangement cascade to construct the 2-azabicyclo[2.2.1]heptane framework. *Chem. Sci.*, **2020**, *11*, 9488-9493.

[23] Calvet, G.; Blanchard, N.; Kouklovsky, C. Synthesis of polysubstituted pyrroles from nitroso-Diels-Alder cycloadducts. *Synthesis (Stuttg.)*, **2005**, 3346-3354.

[24] Song, J.; Wang, Q.; Fu, H.; Fu, S.; Li, S.; Shi, F.; Wu, C. Copper-catalyzed *N*-alkynylation of *N*-*tert*-Butyloxycarbonyl (Boc)-protected indoles. *Asian J. Org. Chem.*, **2013**, *2*, 877-881.

[25] Reddy, R. P.; Davies, H. M. L. Asymmetric synthesis of tropanes by Rhodium-catalyzed [4 + 3] cycloaddition. *J. Am. Chem. Soc.*, **2007**, *129*, 10312-10313.

[26] Zhang, W.; Liu, T.; Ang, H. T.; Luo, P.; Lei, Z.; Luo, X.; Koh, M. J.; Wu, J. Modular and practical 1,2-aryl(alkenyl) heteroatom functionalization of alkenes through iron/photoredox dual catalysis. *Angew. Chem. Int. Ed.*, **2023**, *62*, e202310978.

[27] Guo, Y.; Ma, S.; Shi, L.; Liu, L.; Lei, X.; Jiao, P. *gem*-Bromonitrocyclobutane induced radical cyclization of acrylanilides to construct 2-oxindoles via photoredox catalysis. *Org. Chem. Front.*, **2023**, *10*, 2257-2262.

[28] Qi, M.; Li, M.; Bai, L.; Liu, J.; Luan, X. Rapid assembly of spiroisoxazolidines by [4 + 1] dearomative spiroannulation of  $\alpha$ -bromo- $\beta$ -naphthol and nitroolefin. *J. Org Chem.*, **2023**, *88*, 5997-6007.

[29] Ma, S.; Guo, Y.; Liu, L.; Shi, L.; Lei, X.; Duan, X.; Jiao, P. *gem*-Bromonitroalkane involved radical 1,2-aryl migration of  $\alpha,\alpha$ -diaryl allyl alcohol TMS ether via visible-light photoredox catalysis. *The J. Org Chem.*, **2023**, *88*, 4743-4756.



### 13. NMR spectra

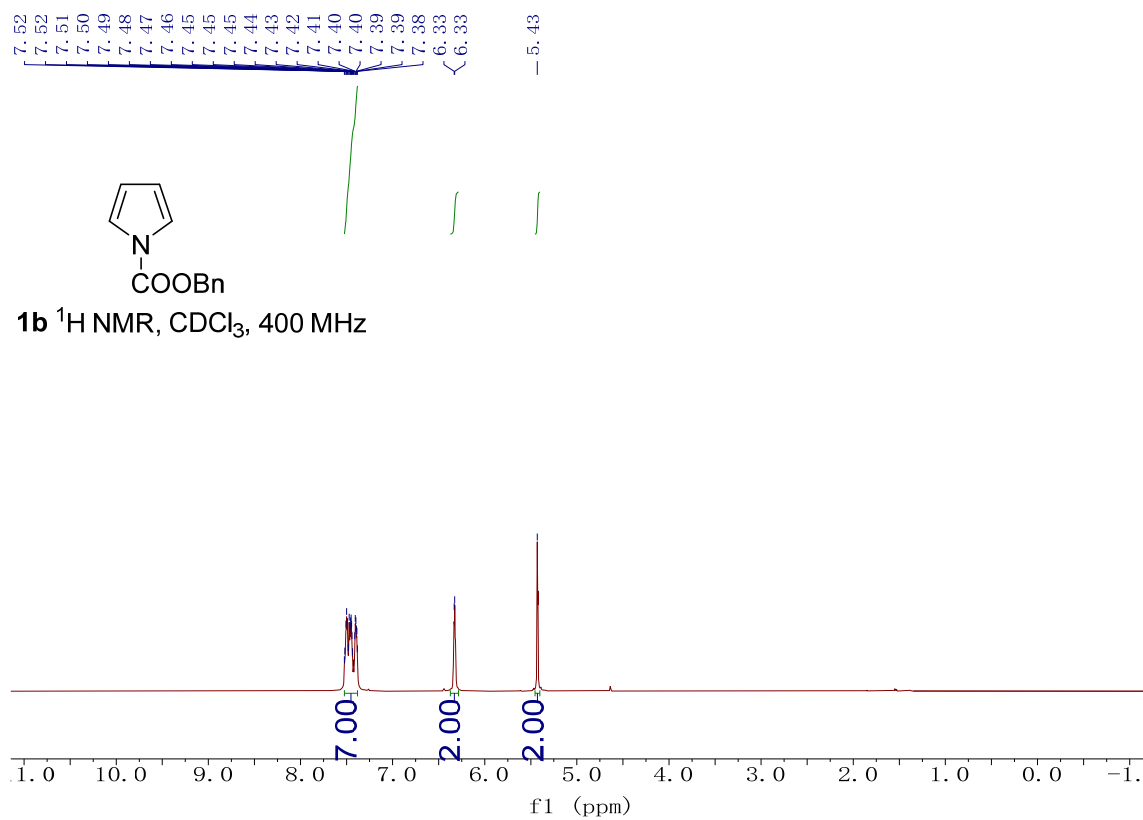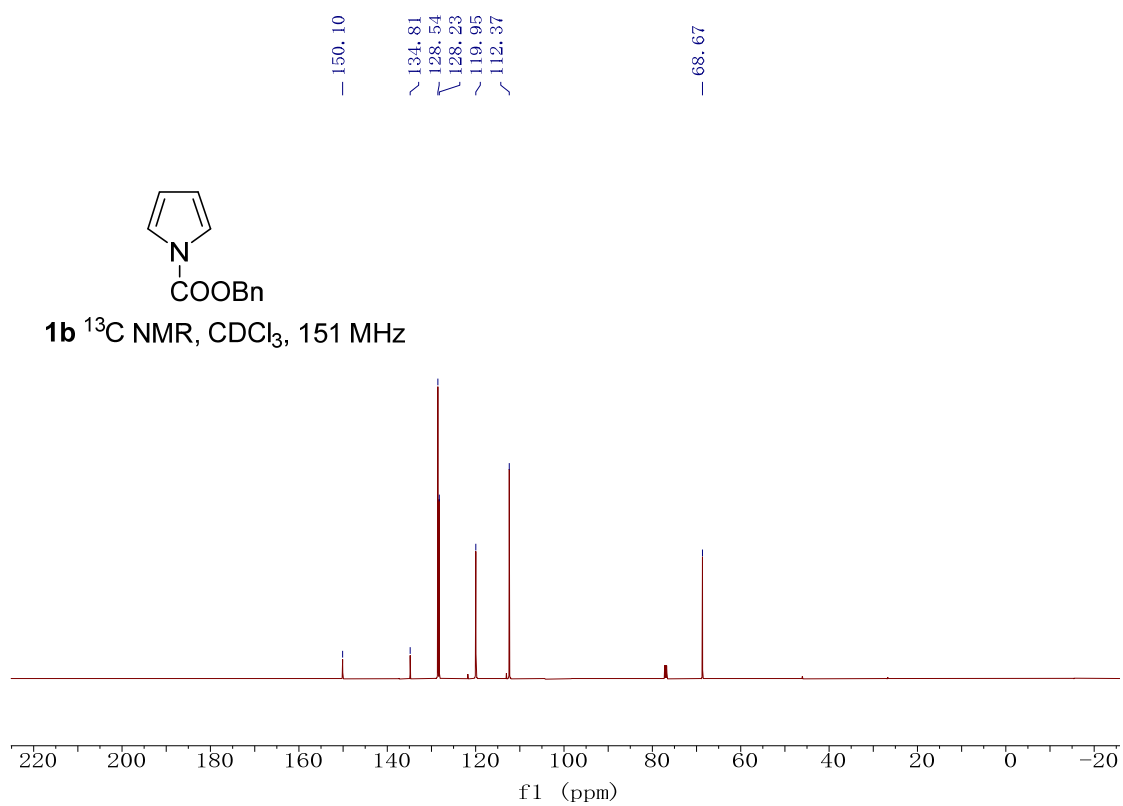

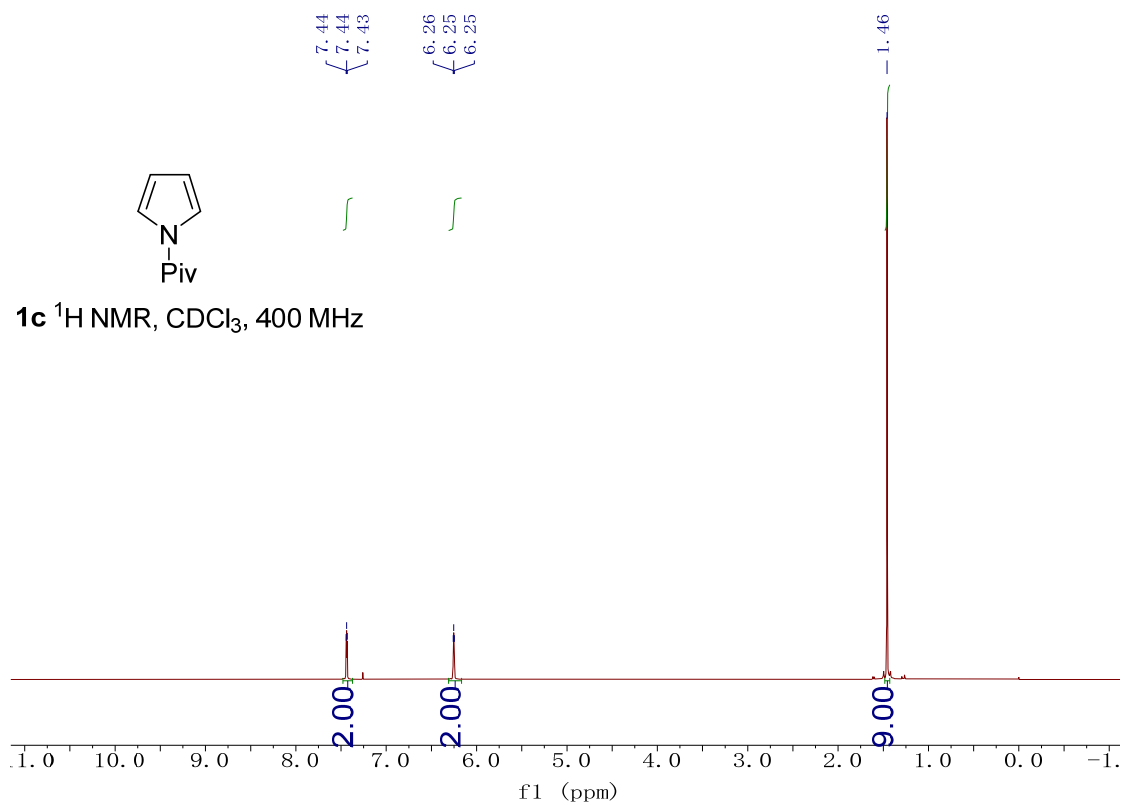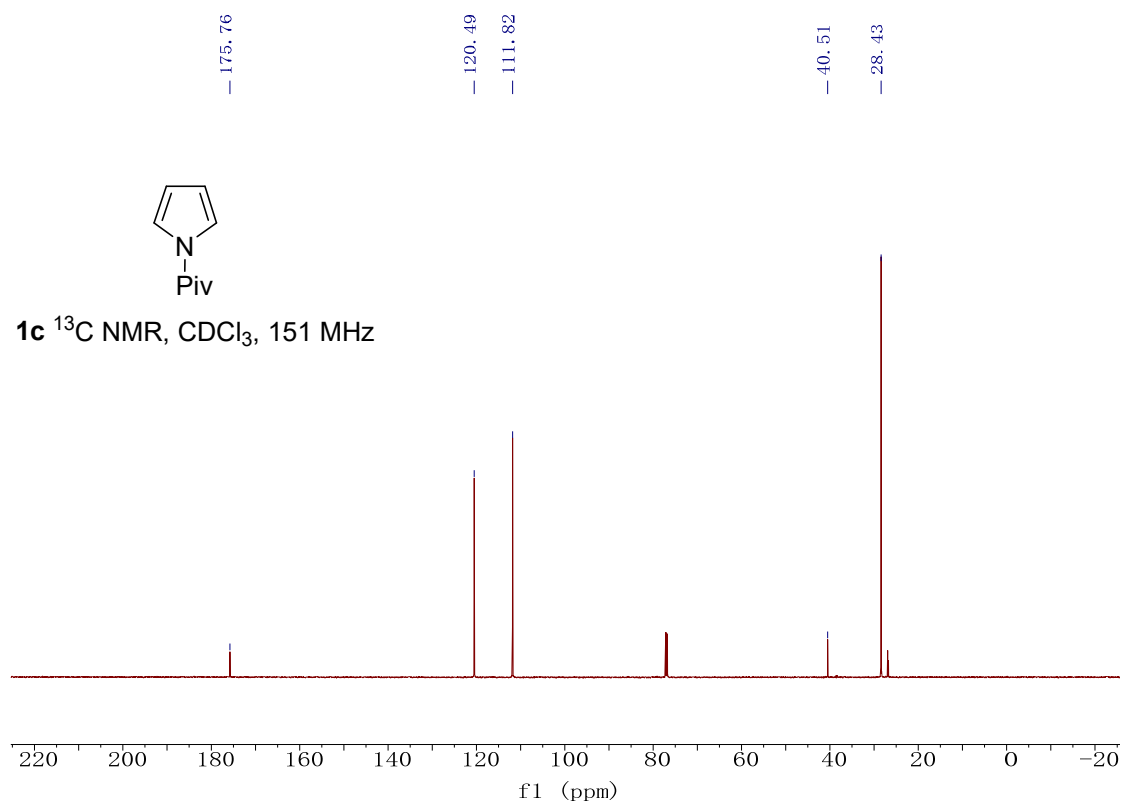

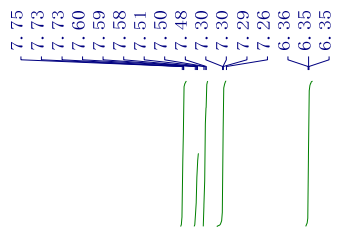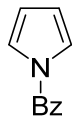

**1d**  $^1\text{H}$  NMR,  $\text{CDCl}_3$ , 600 MHz

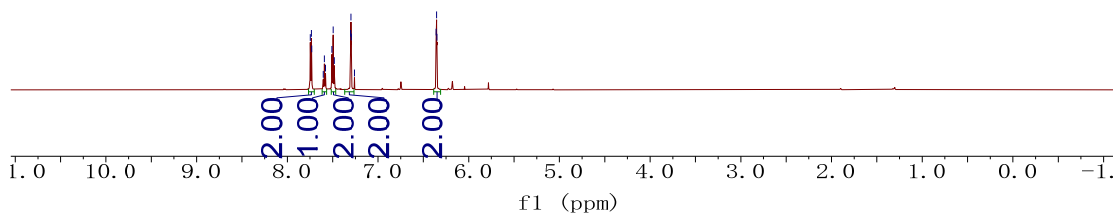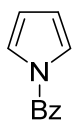

**1d**  $^{13}\text{C}$  NMR,  $\text{CDCl}_3$ , 151 MHz

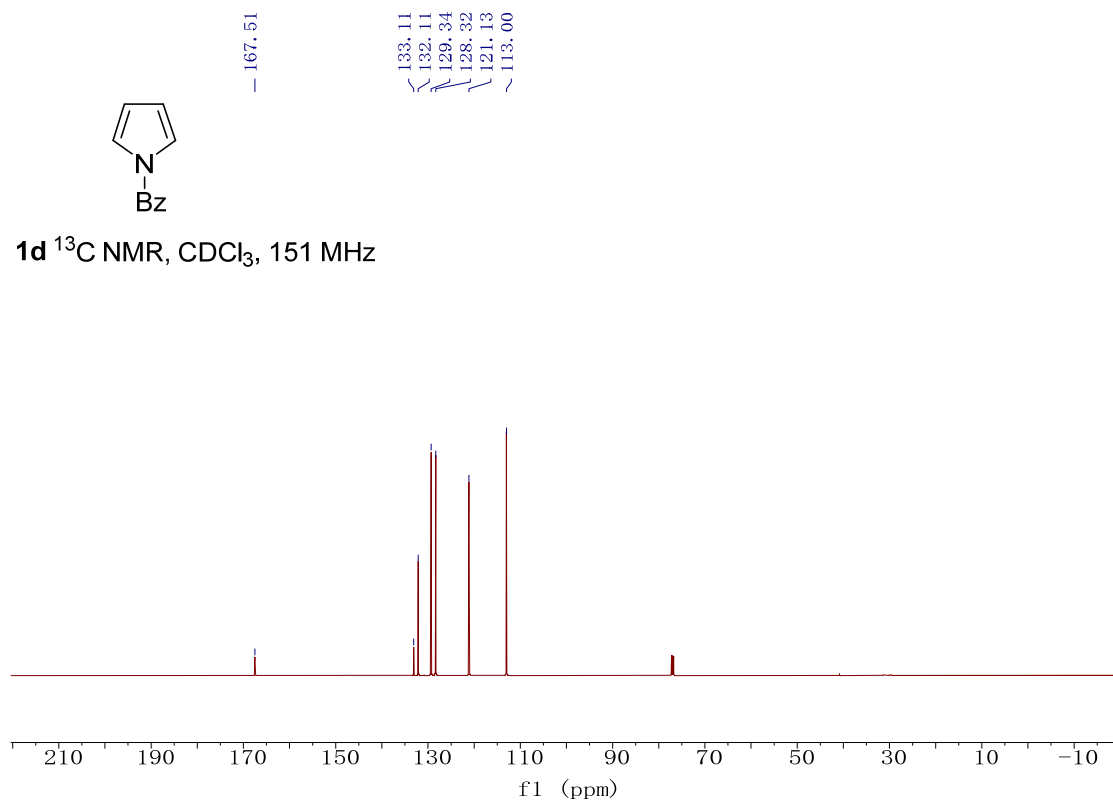

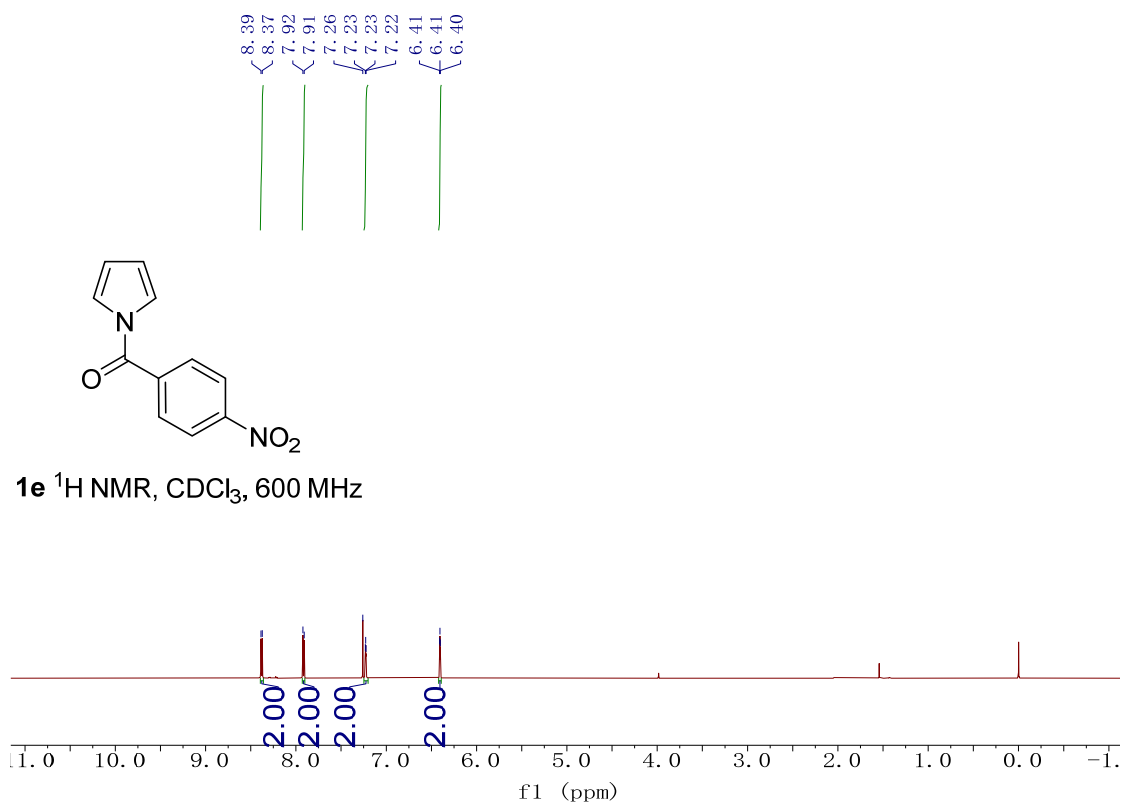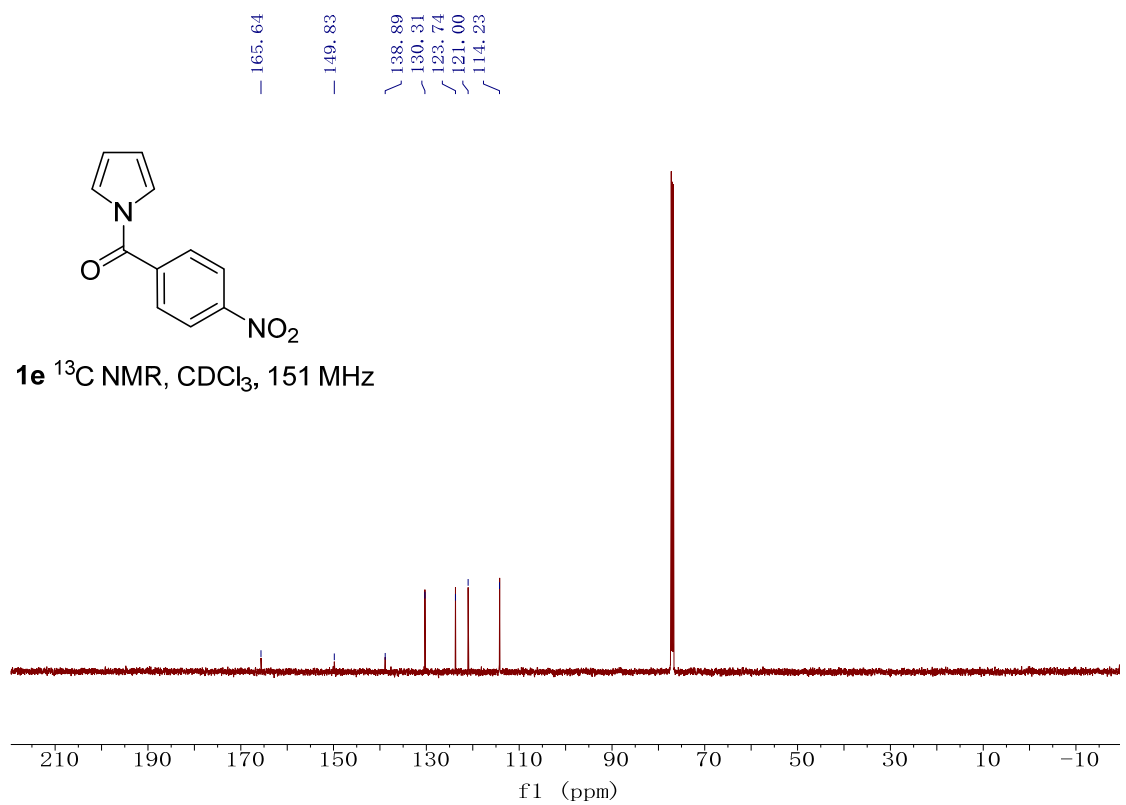

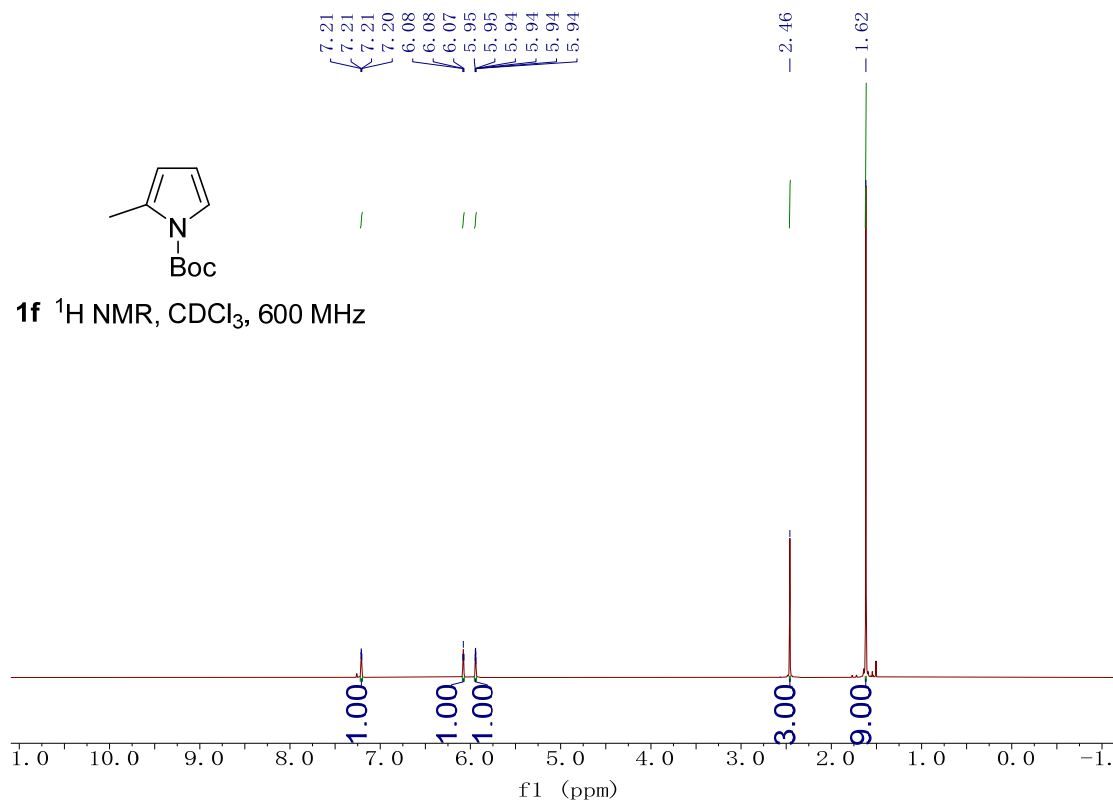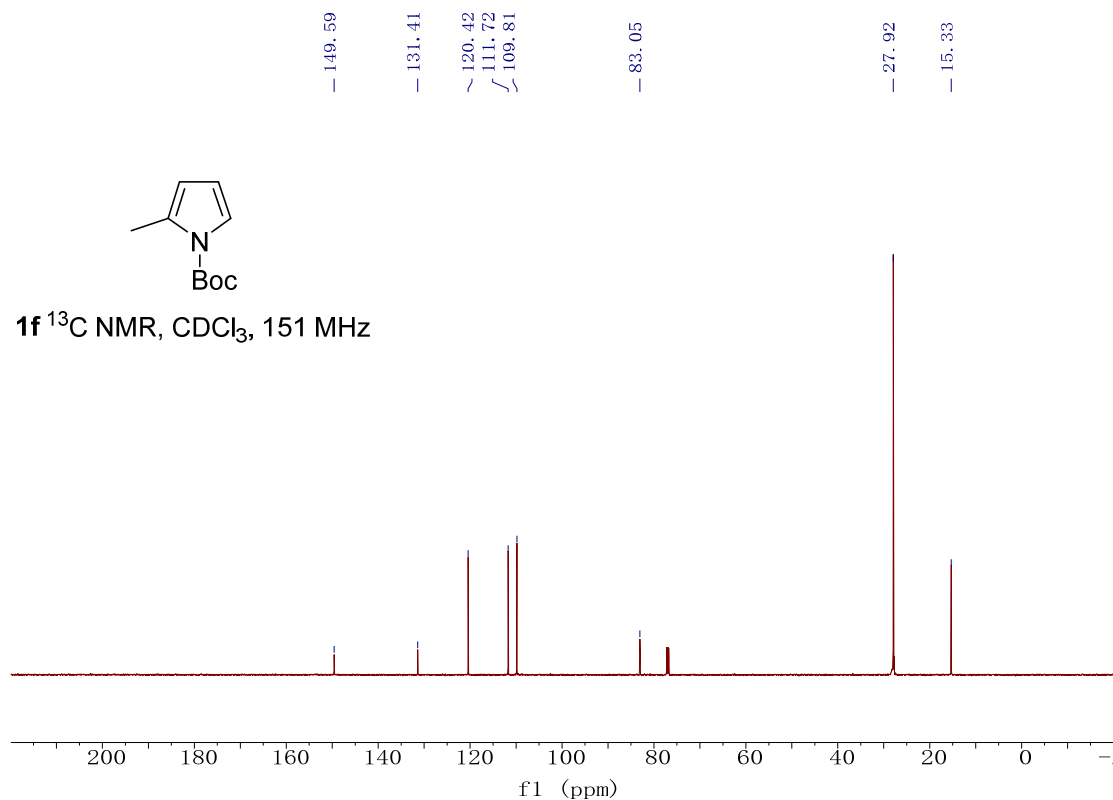

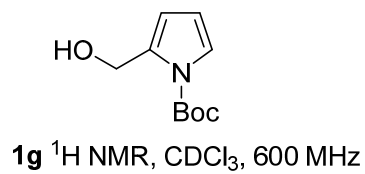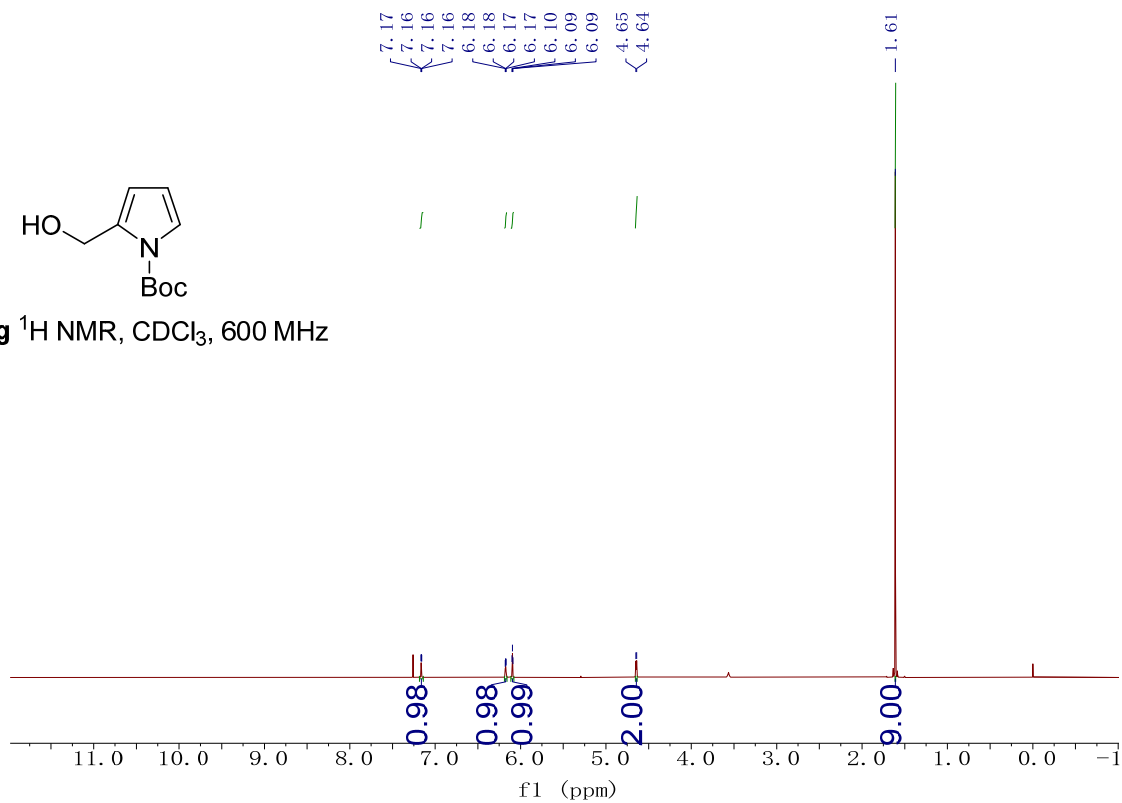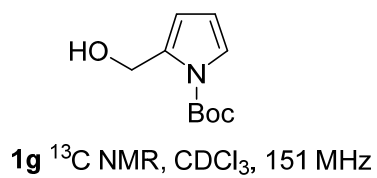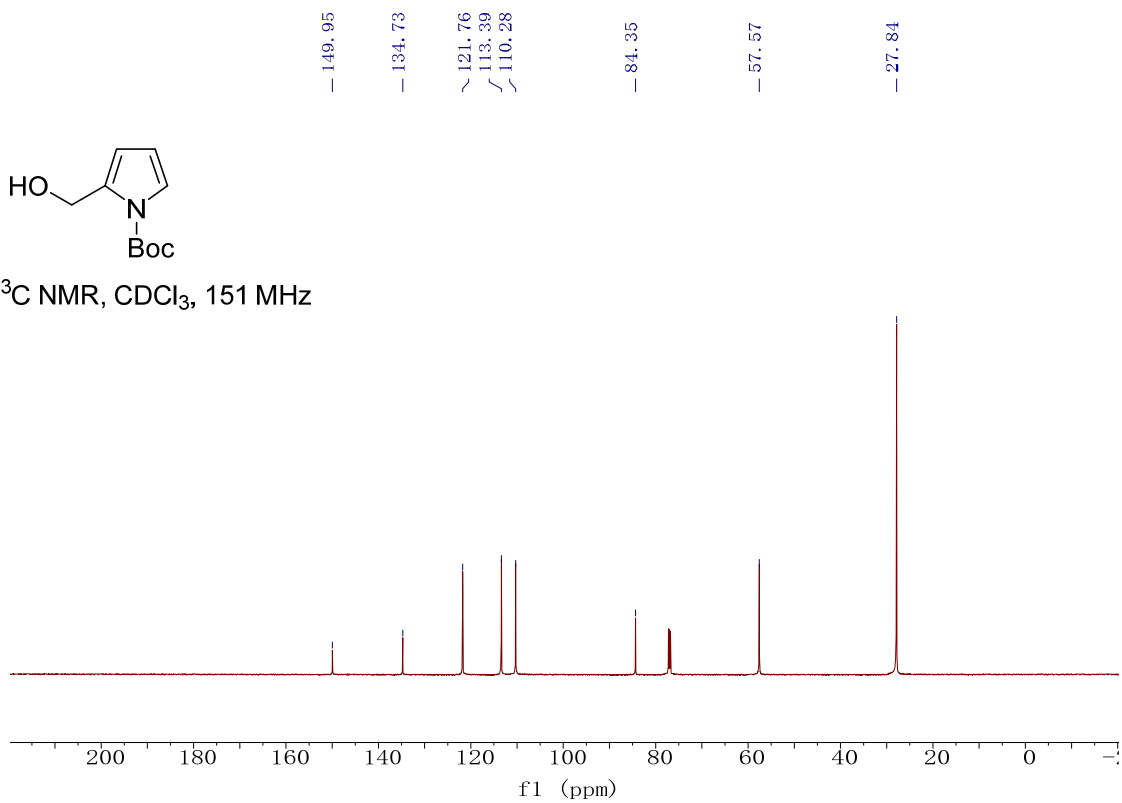

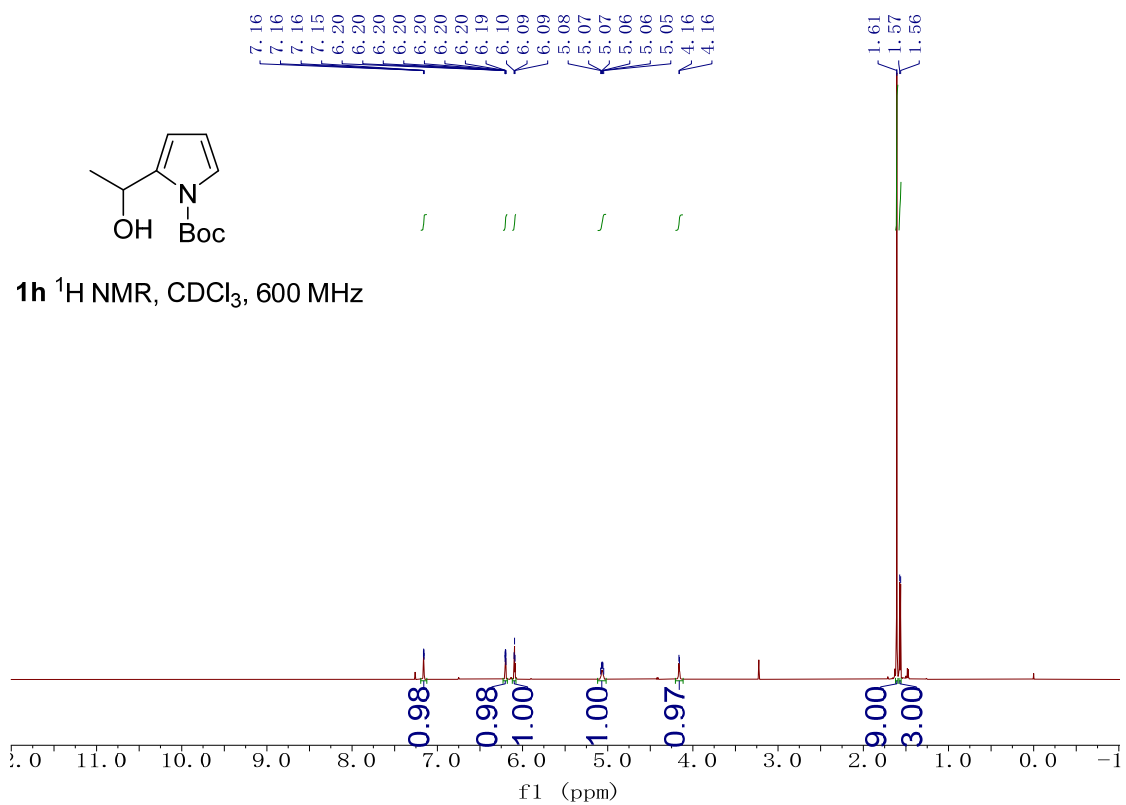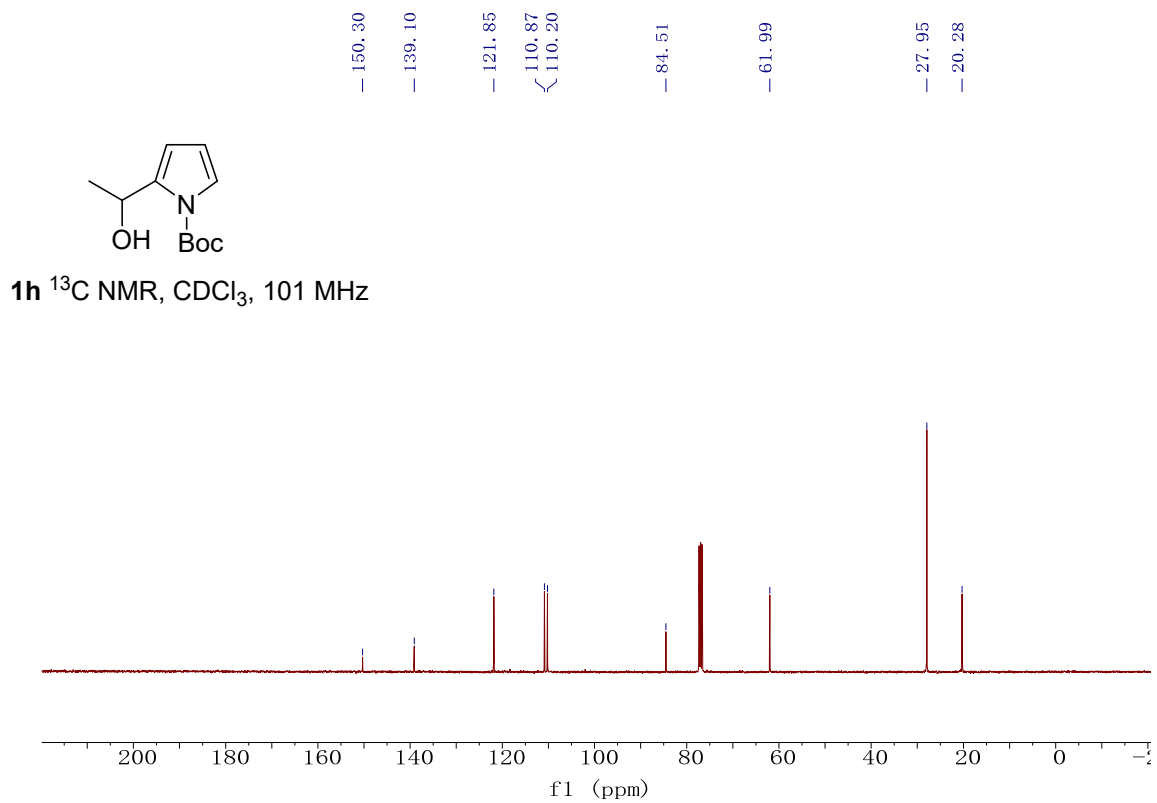

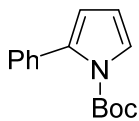

1i <sup>1</sup>H NMR, CDCl<sub>3</sub>, 600 MHz

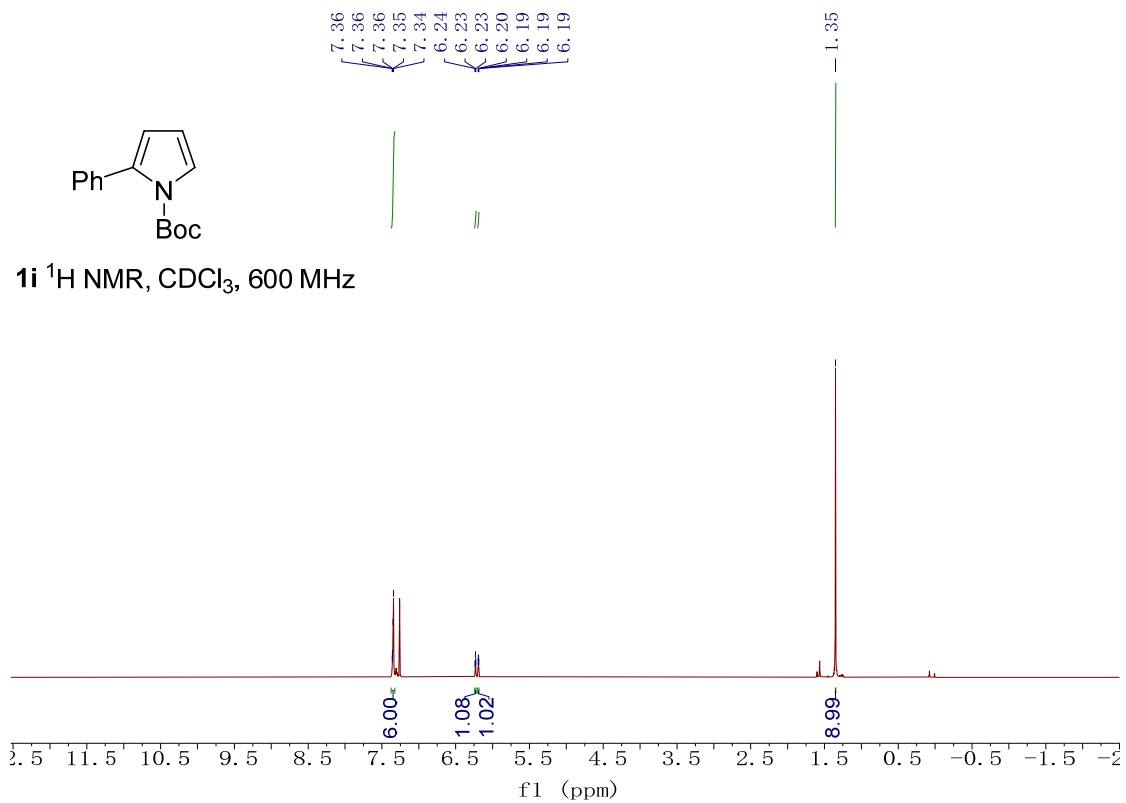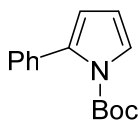

1i <sup>13</sup>C NMR, CDCl<sub>3</sub>, 101 MHz

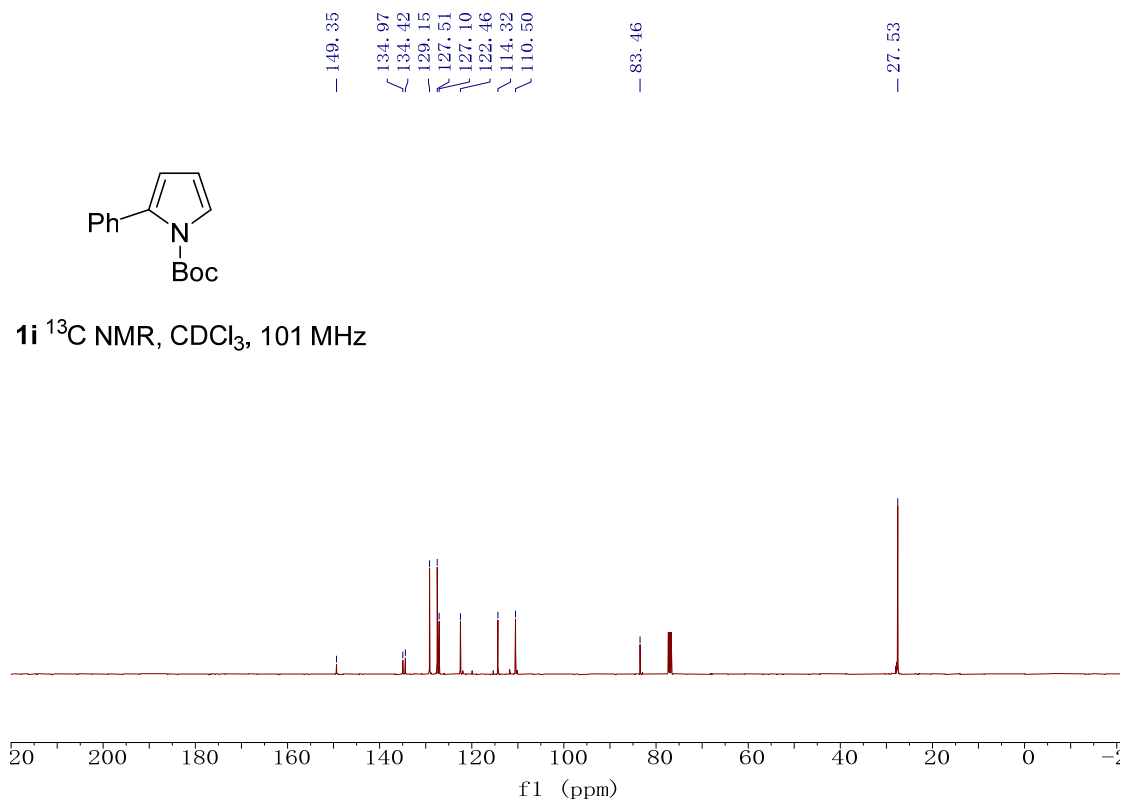



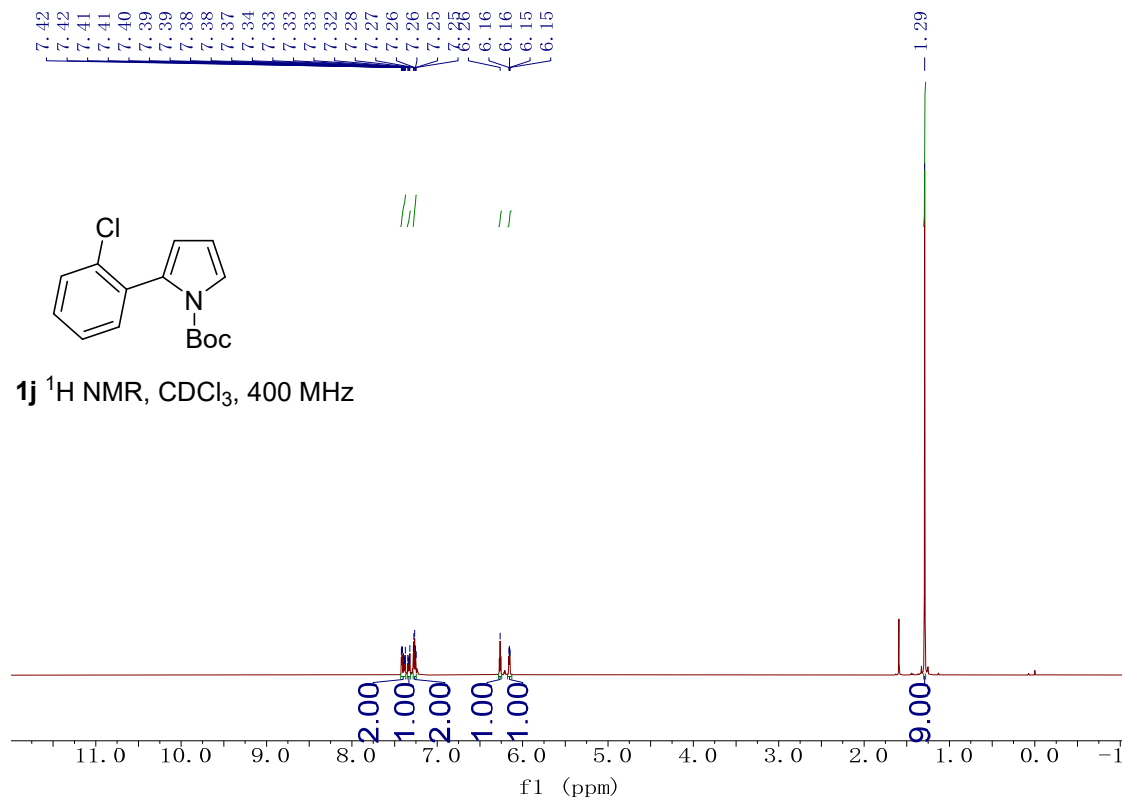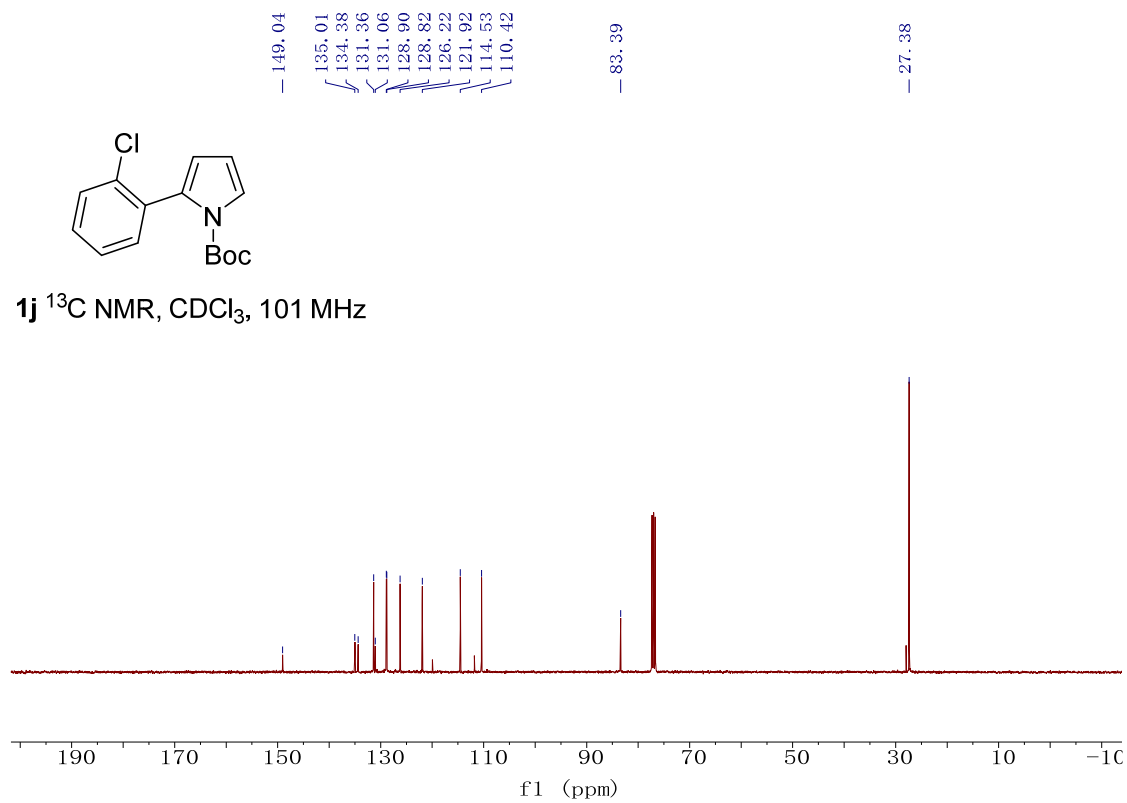

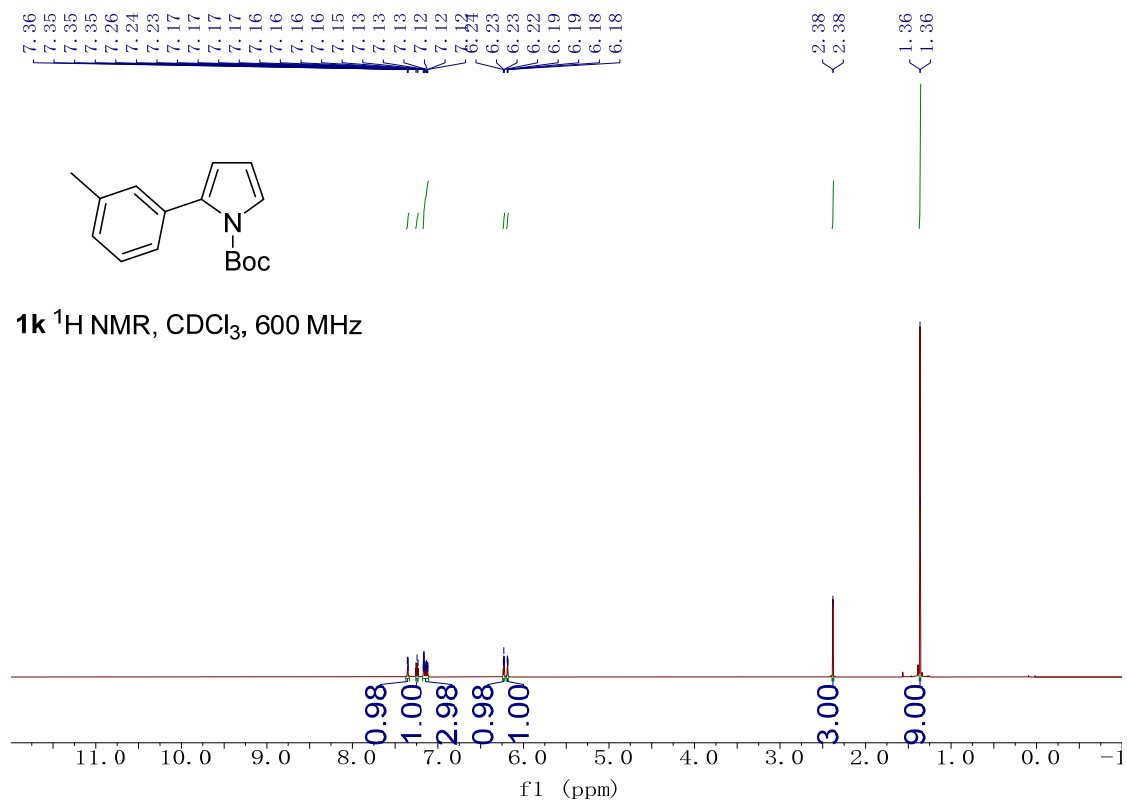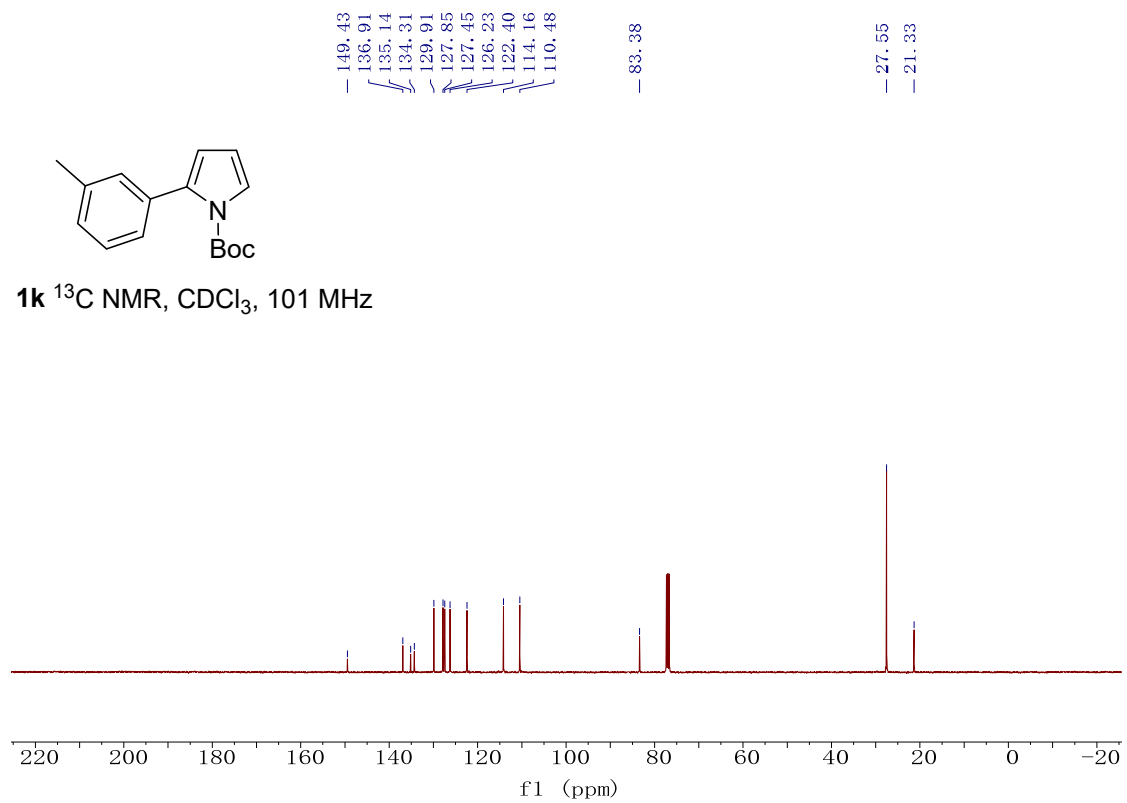

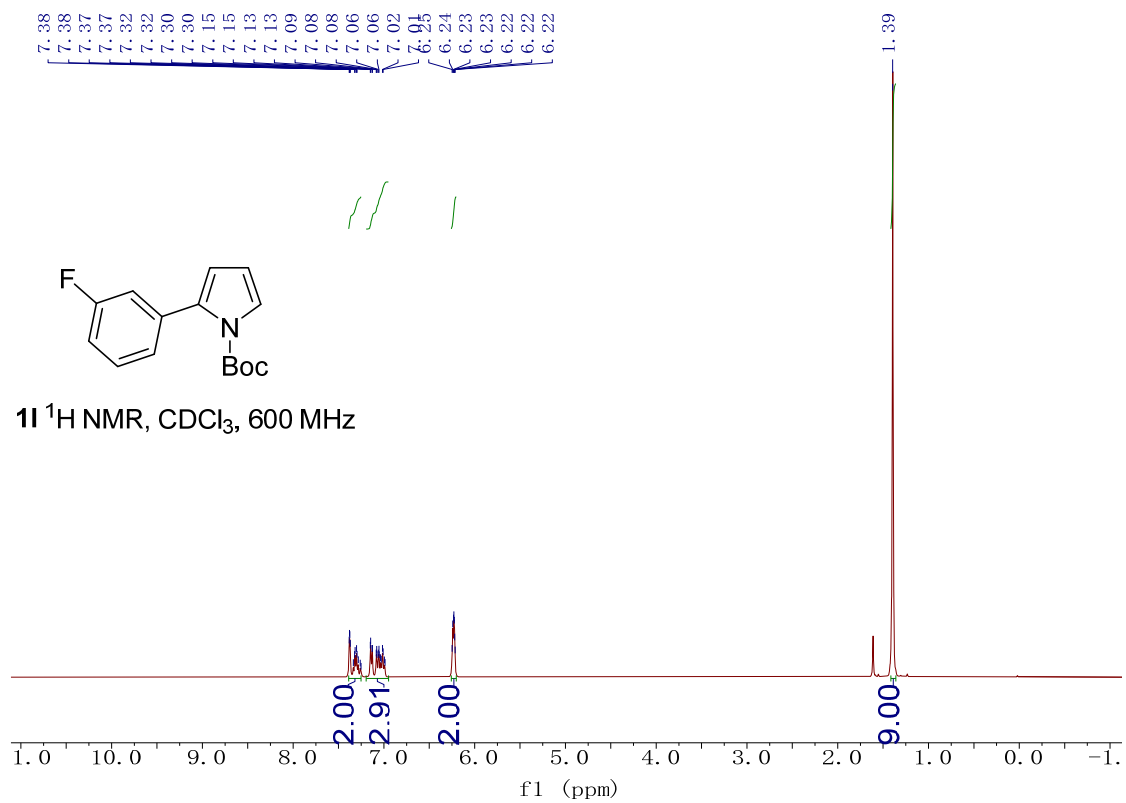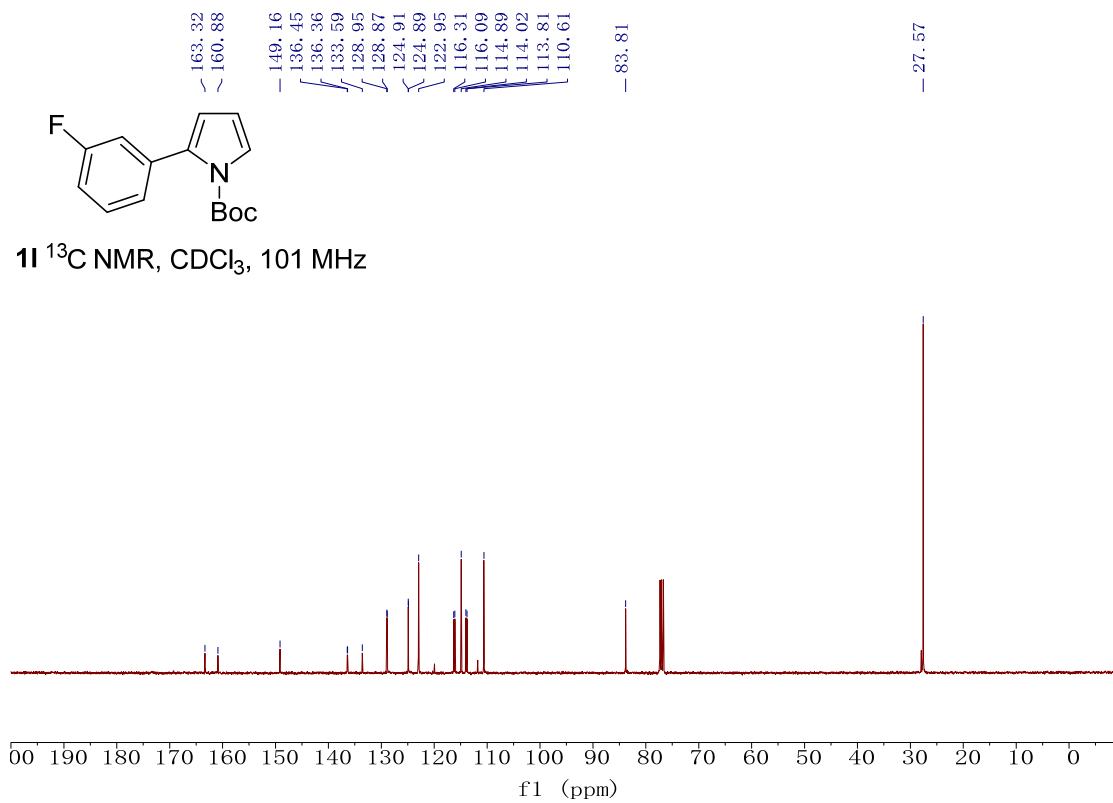

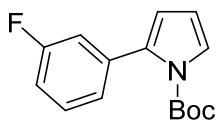

11  $^{19}\text{F}$  NMR,  $\text{CDCl}_3$ , 565 MHz

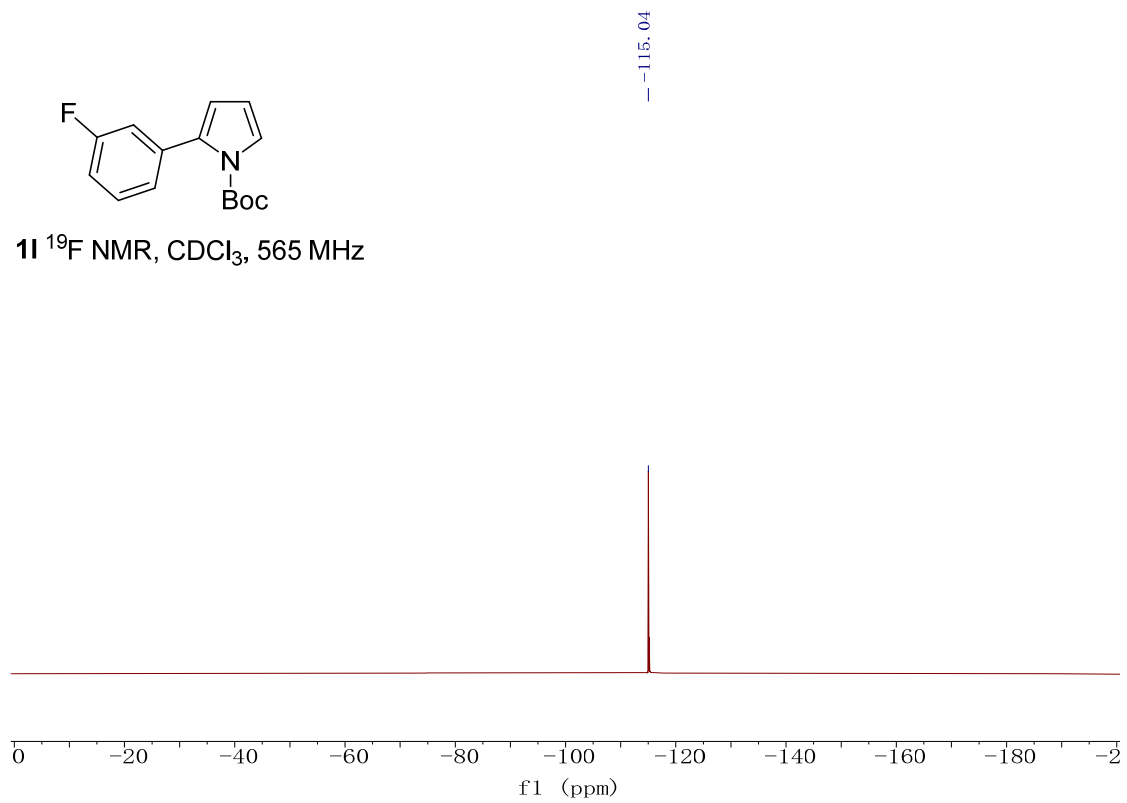

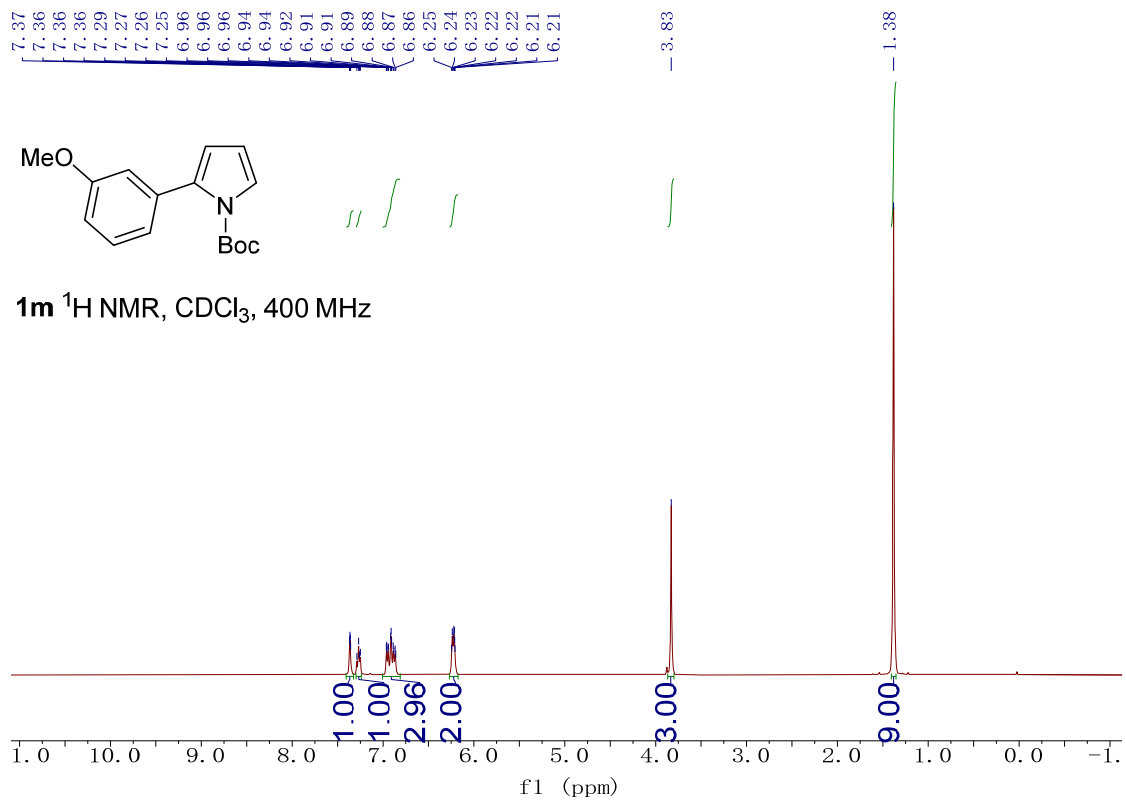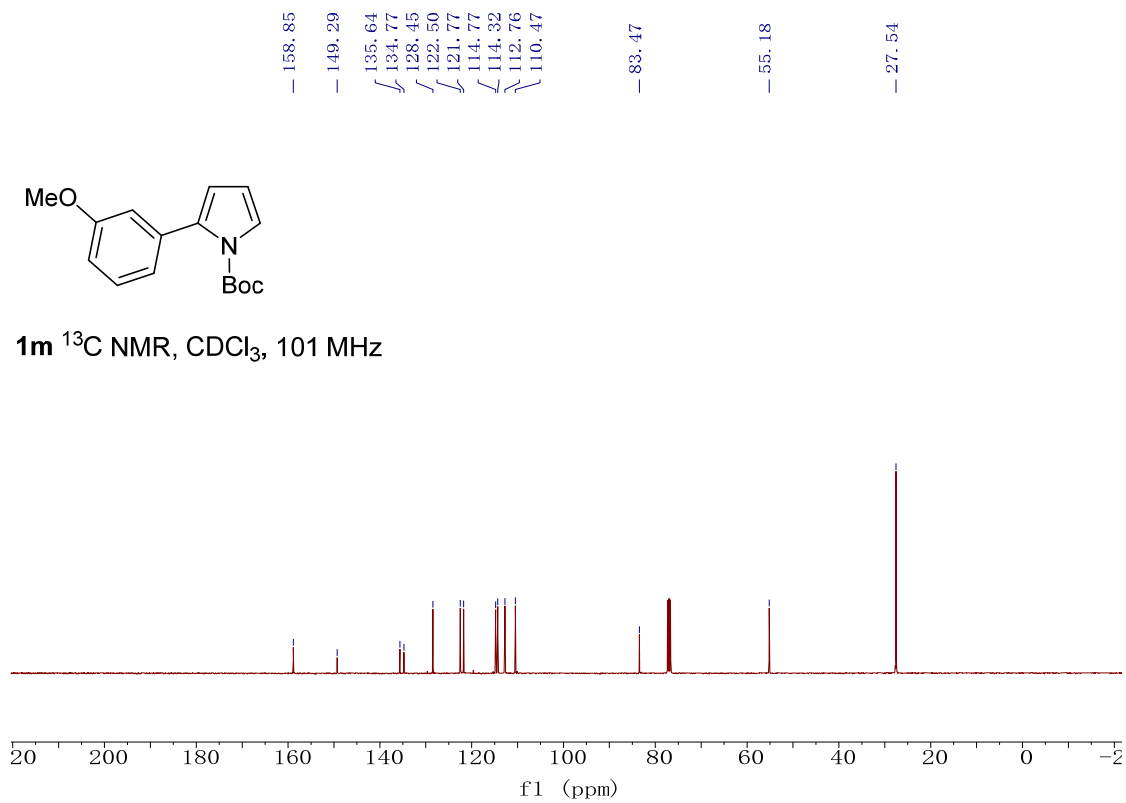

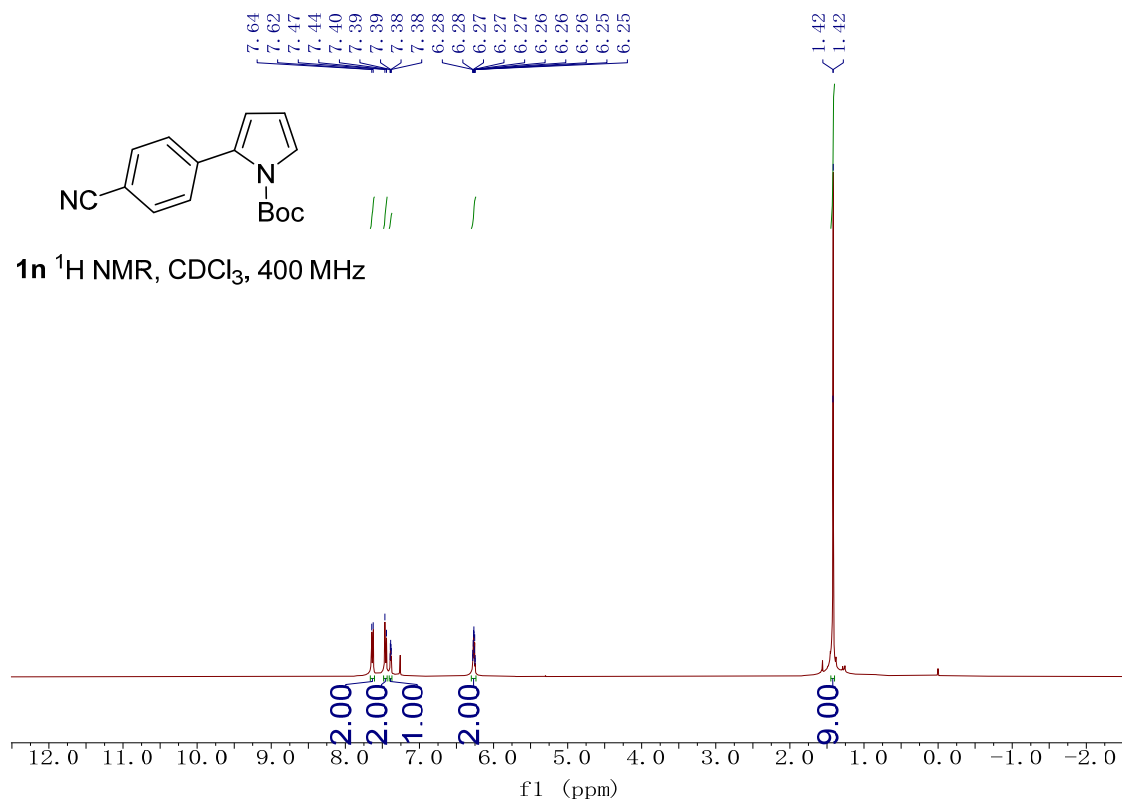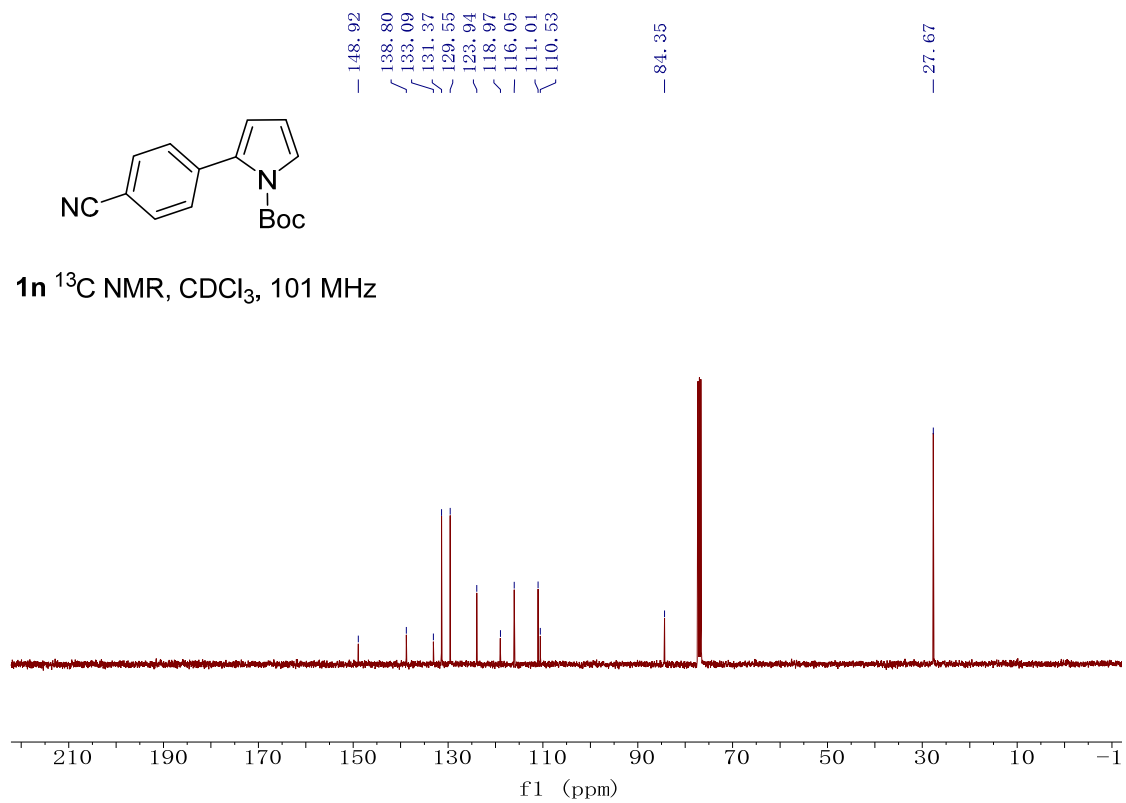

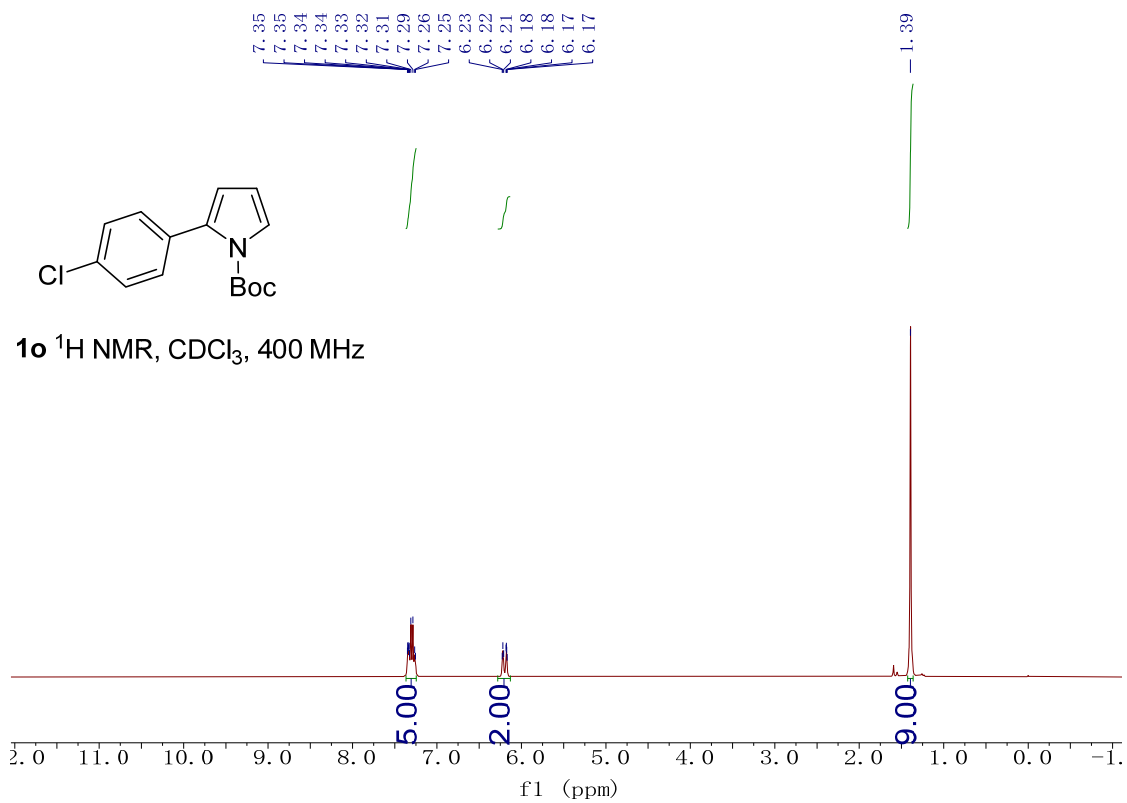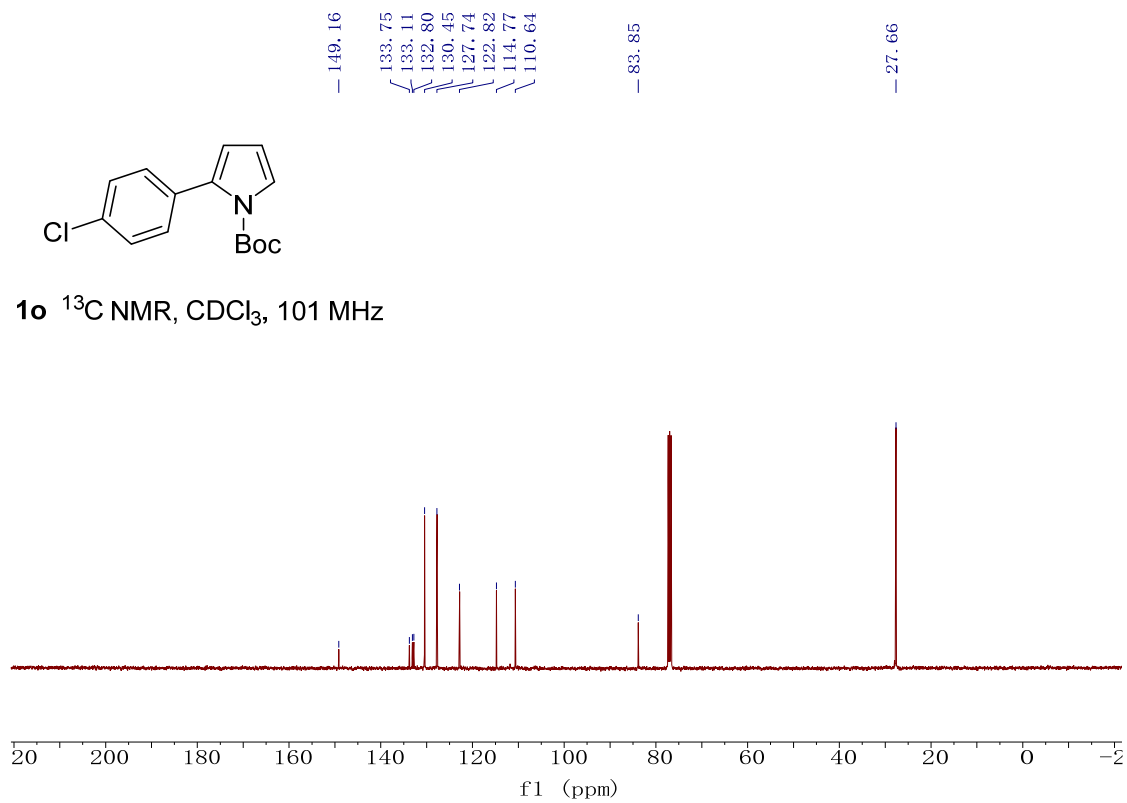

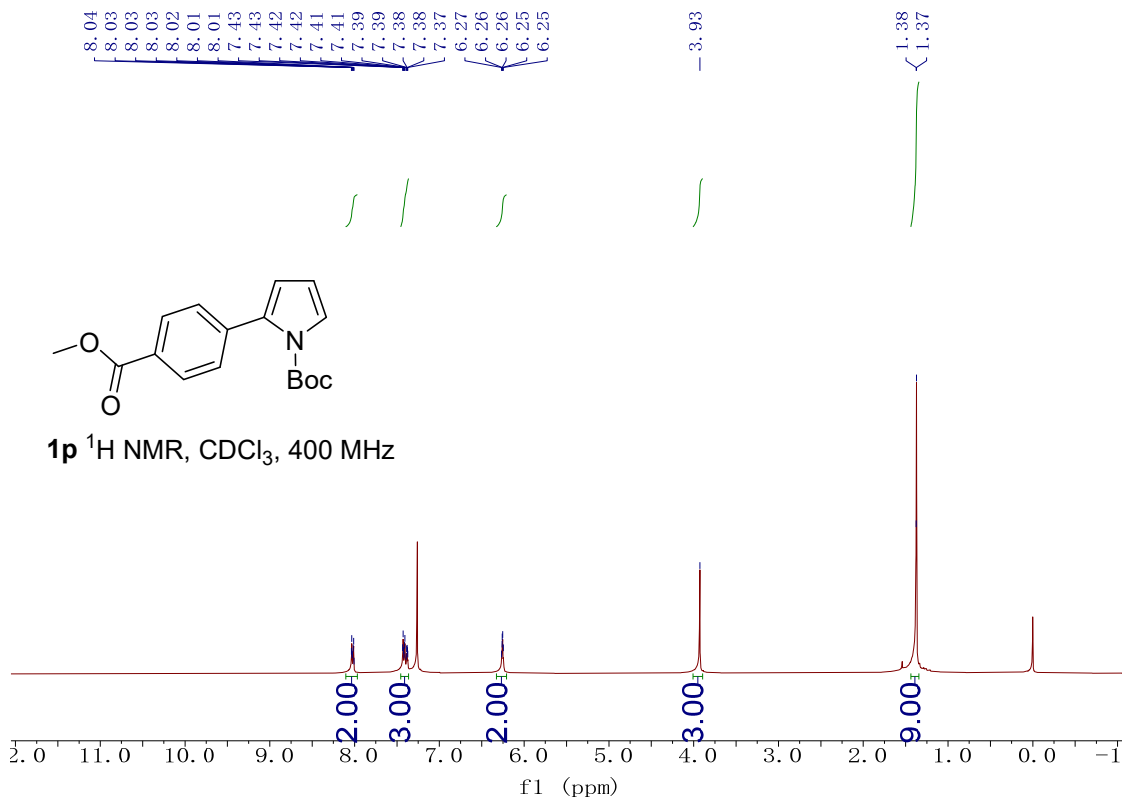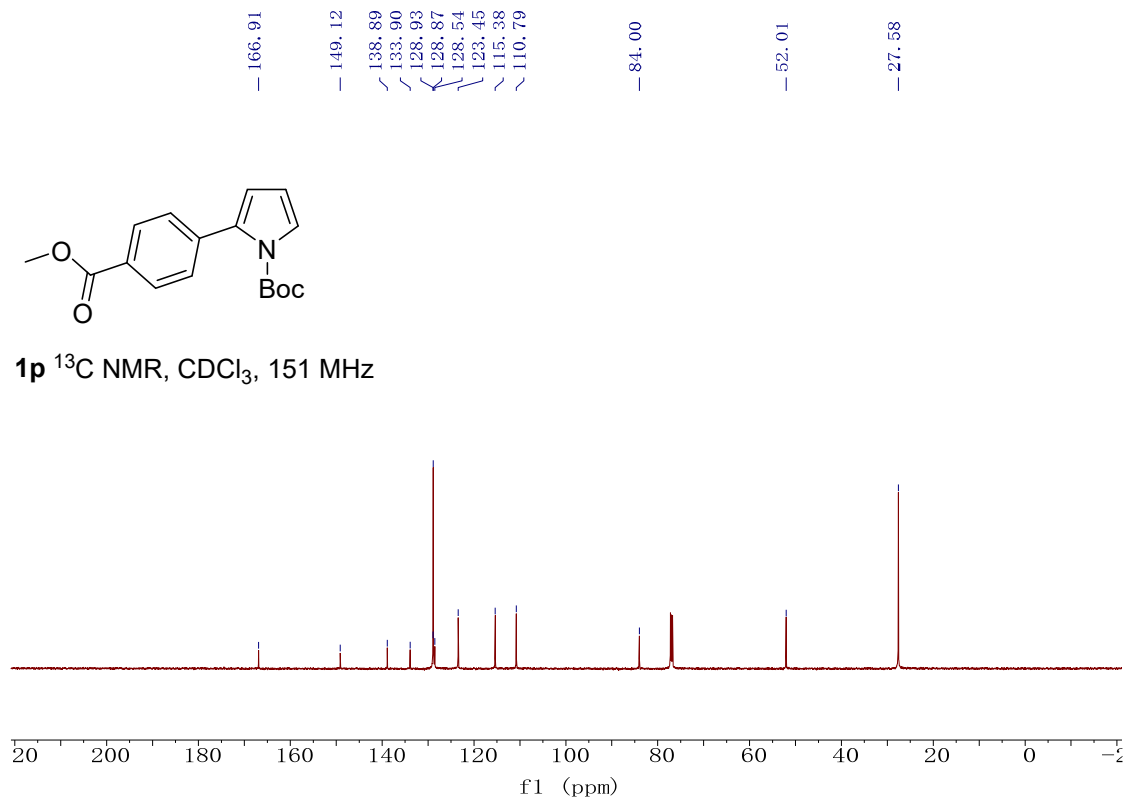



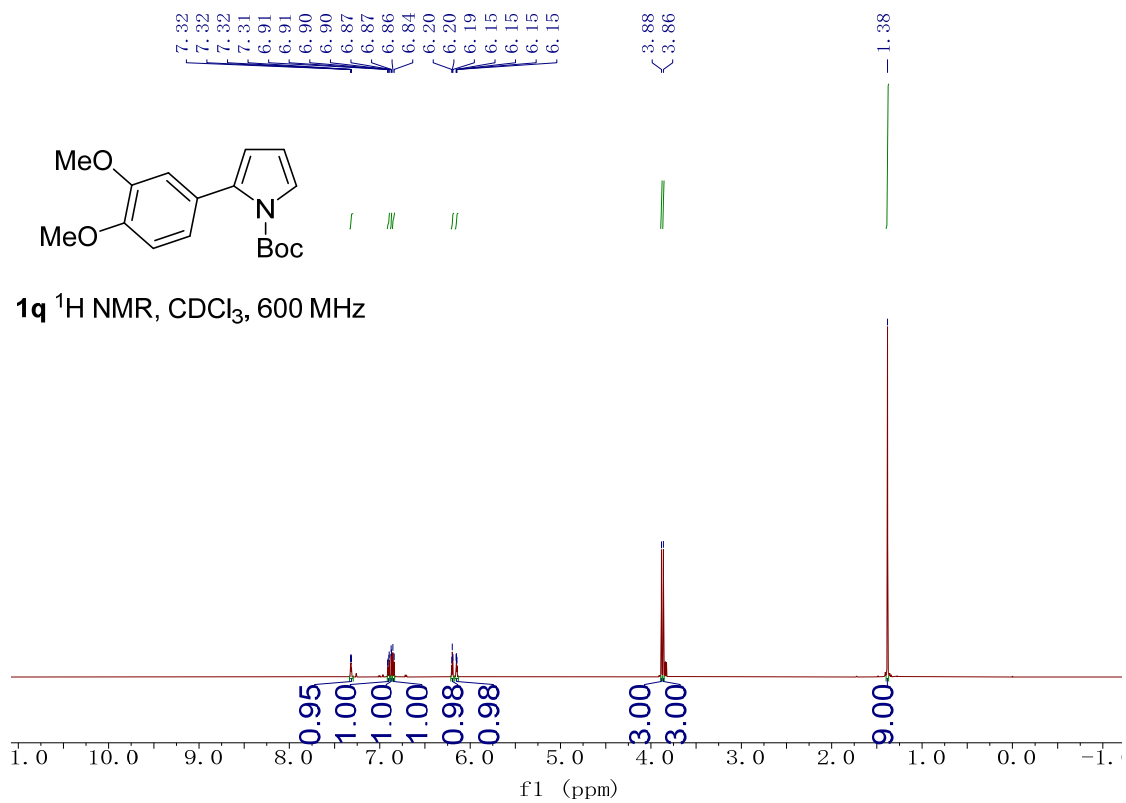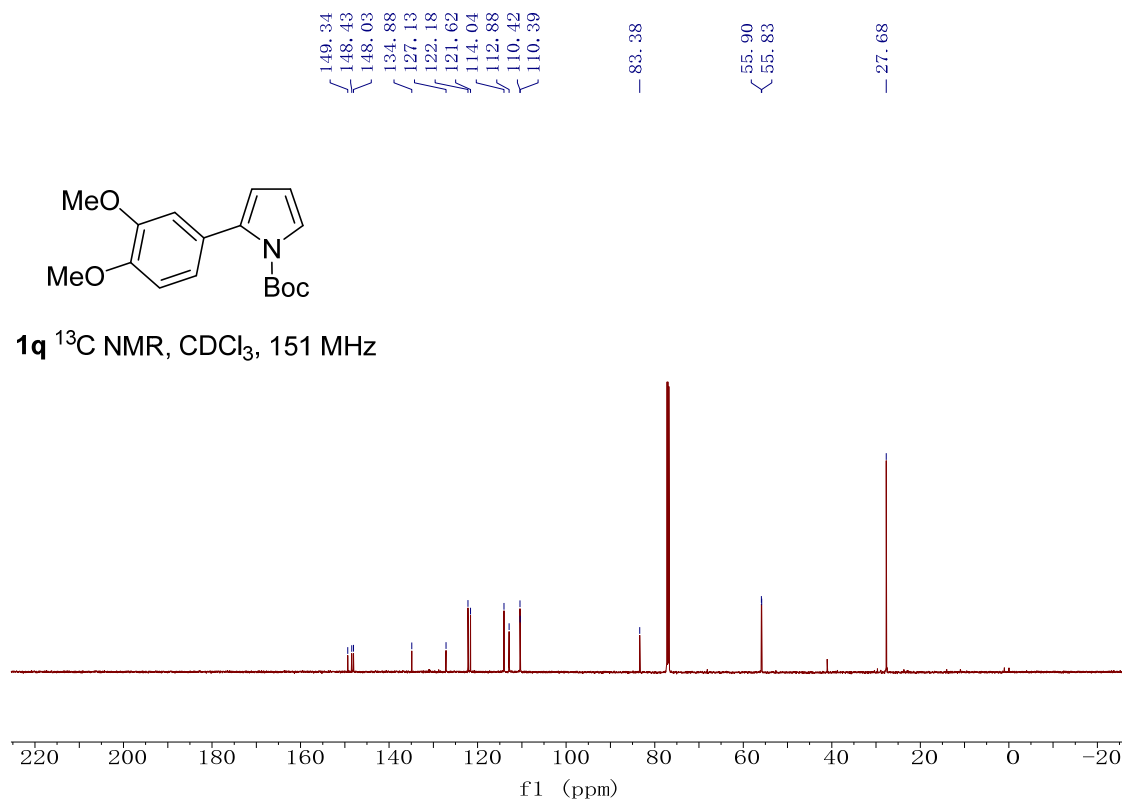

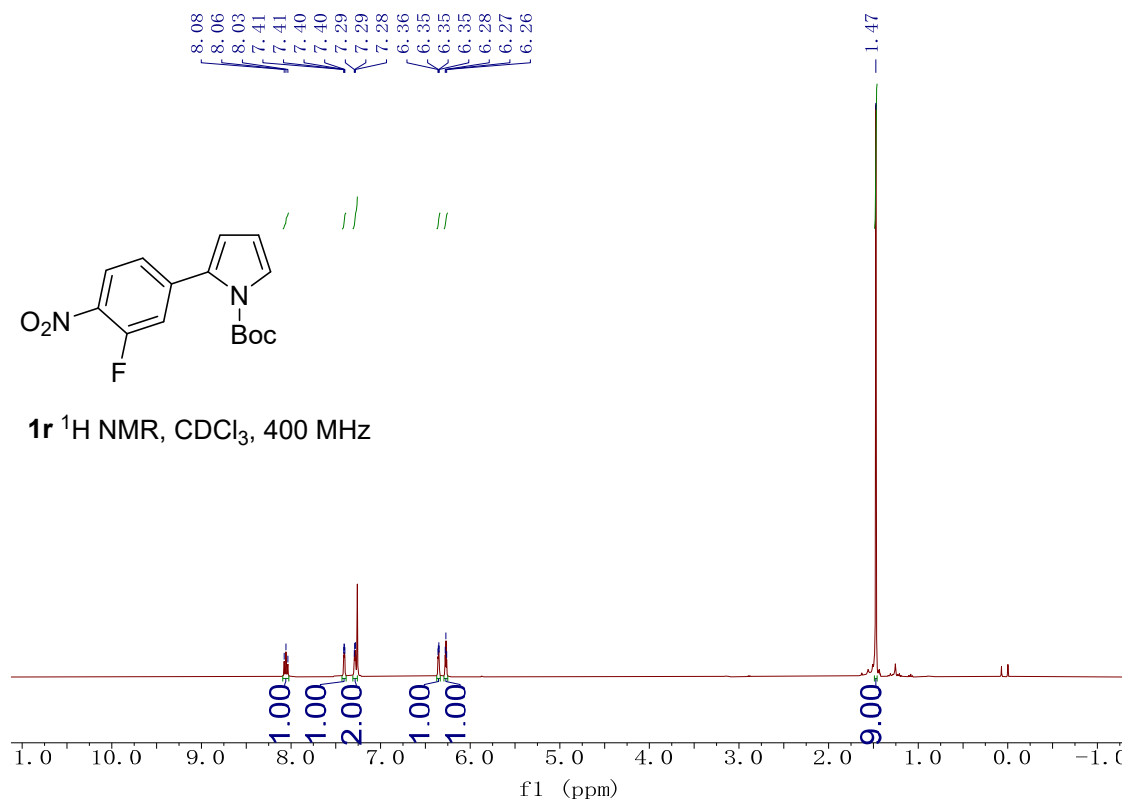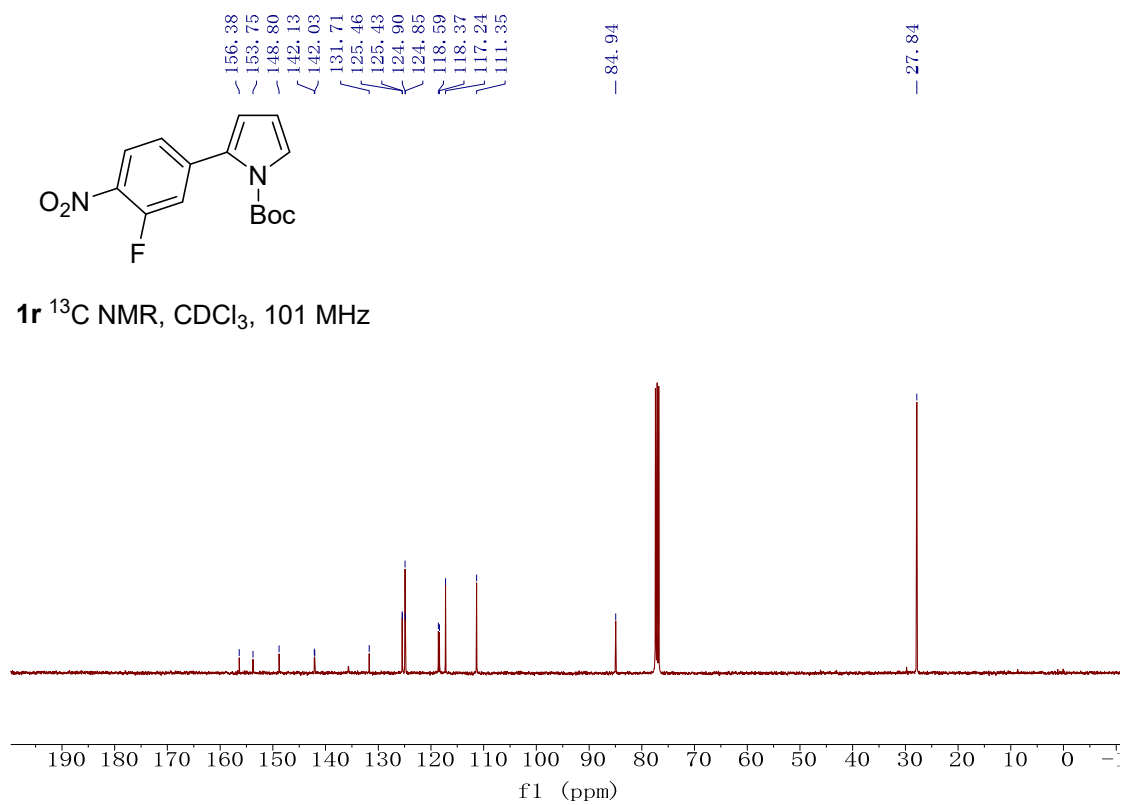

-116.94

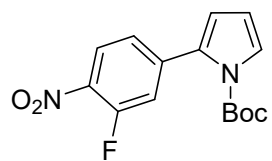

1r <sup>19</sup>F NMR, CDCl<sub>3</sub>, 565MHz

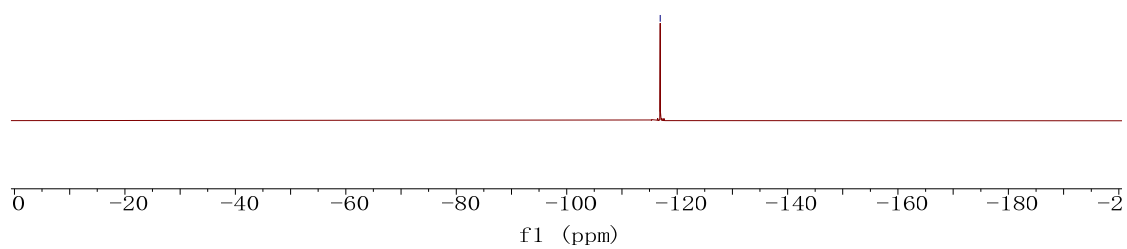

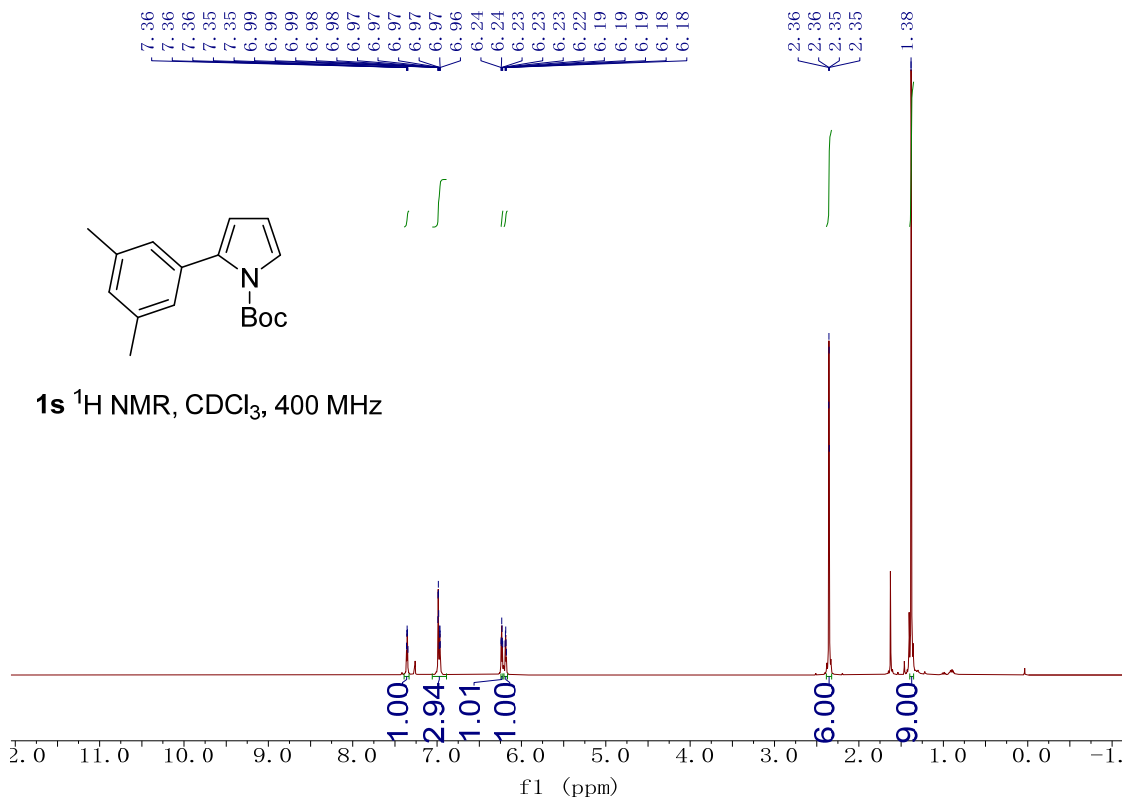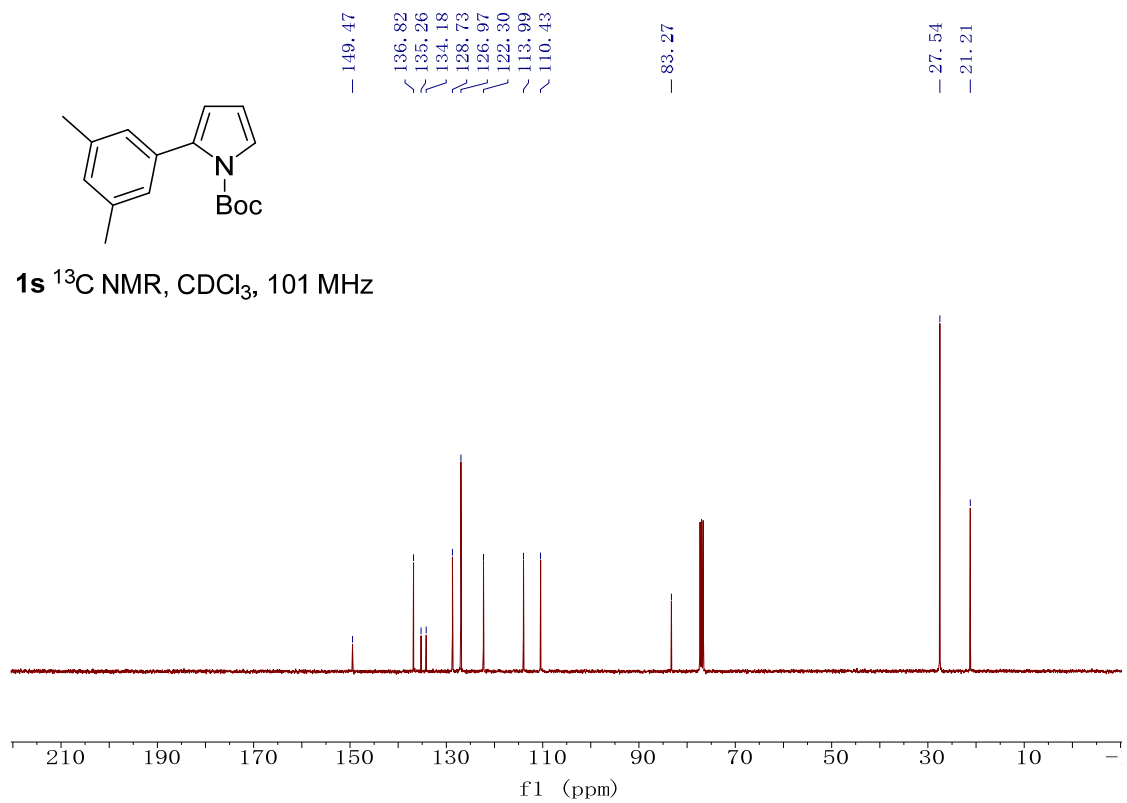

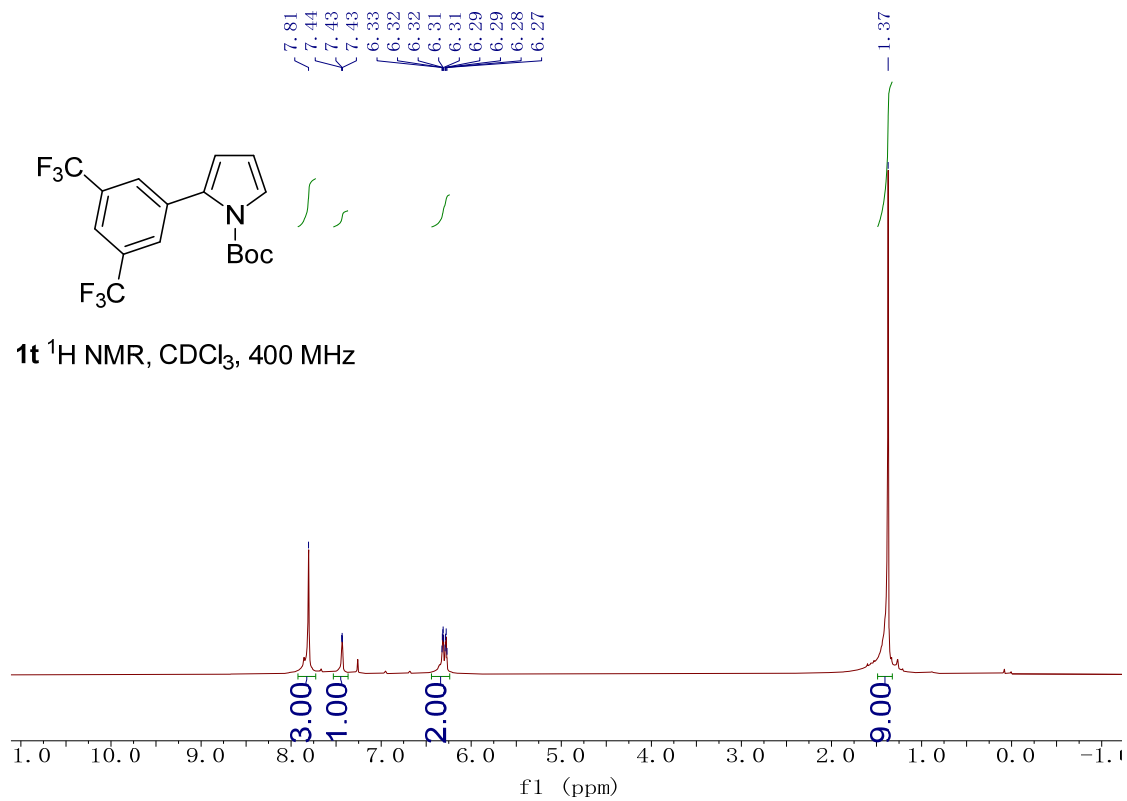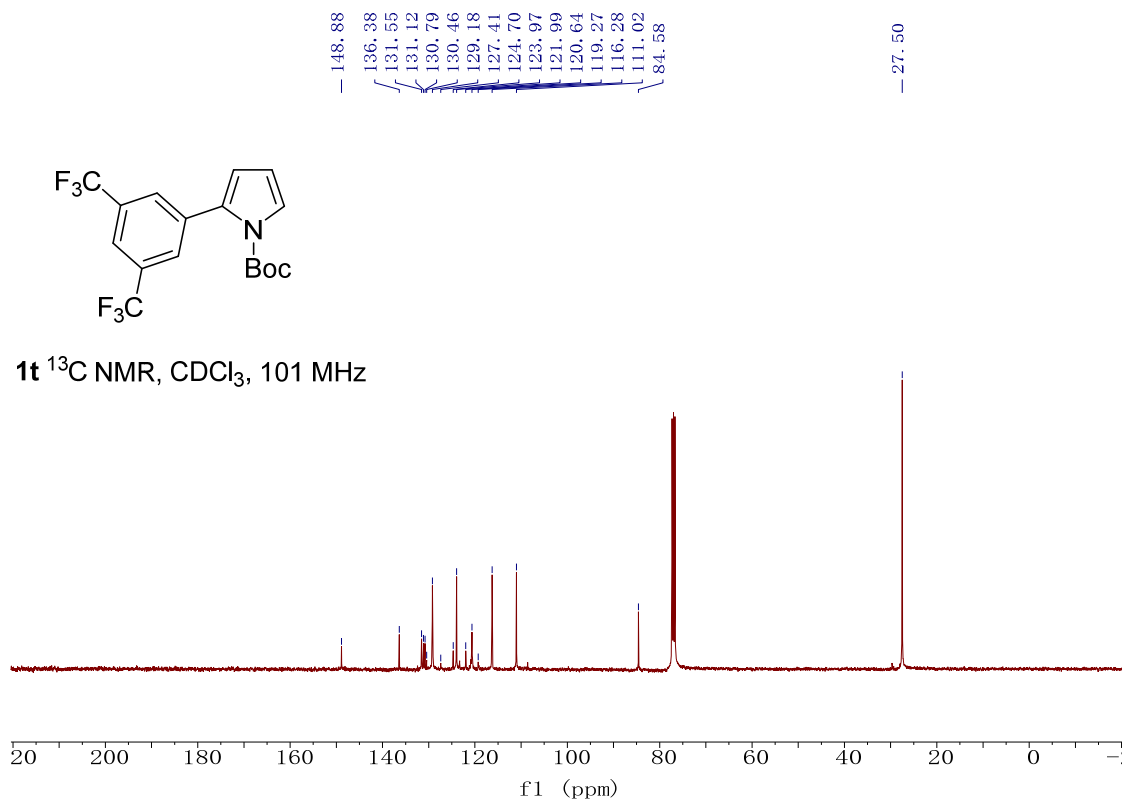

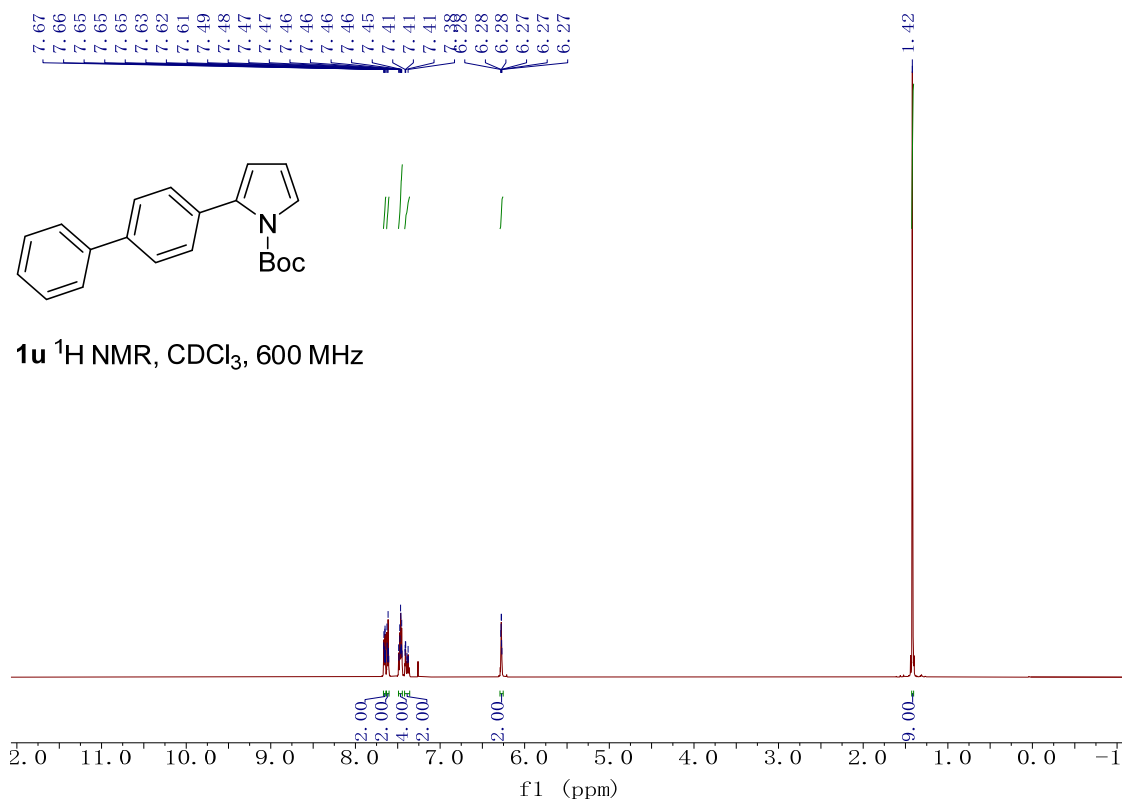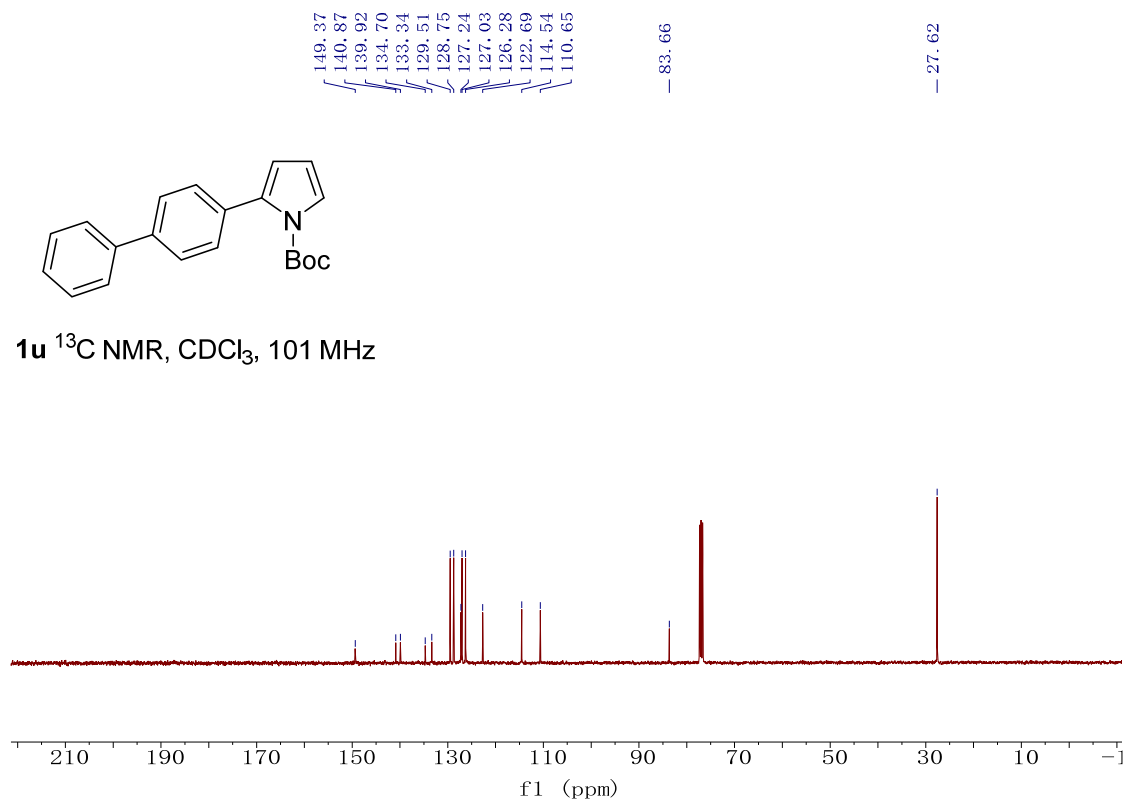

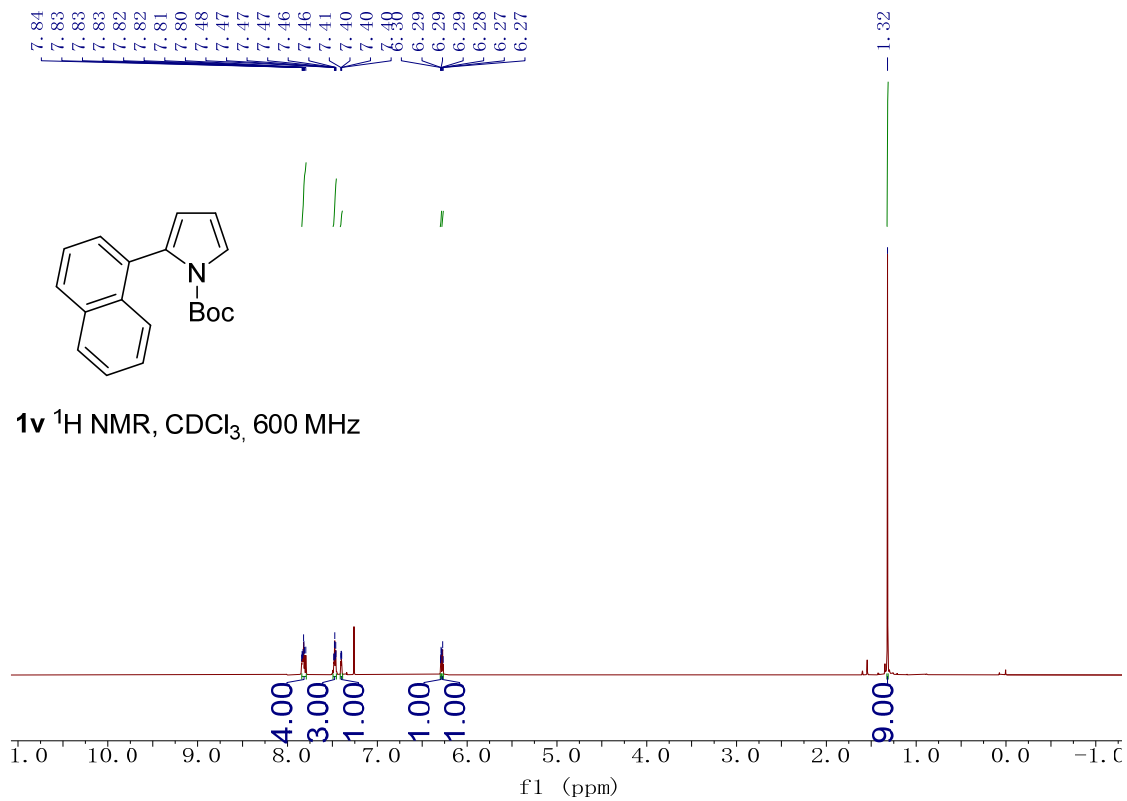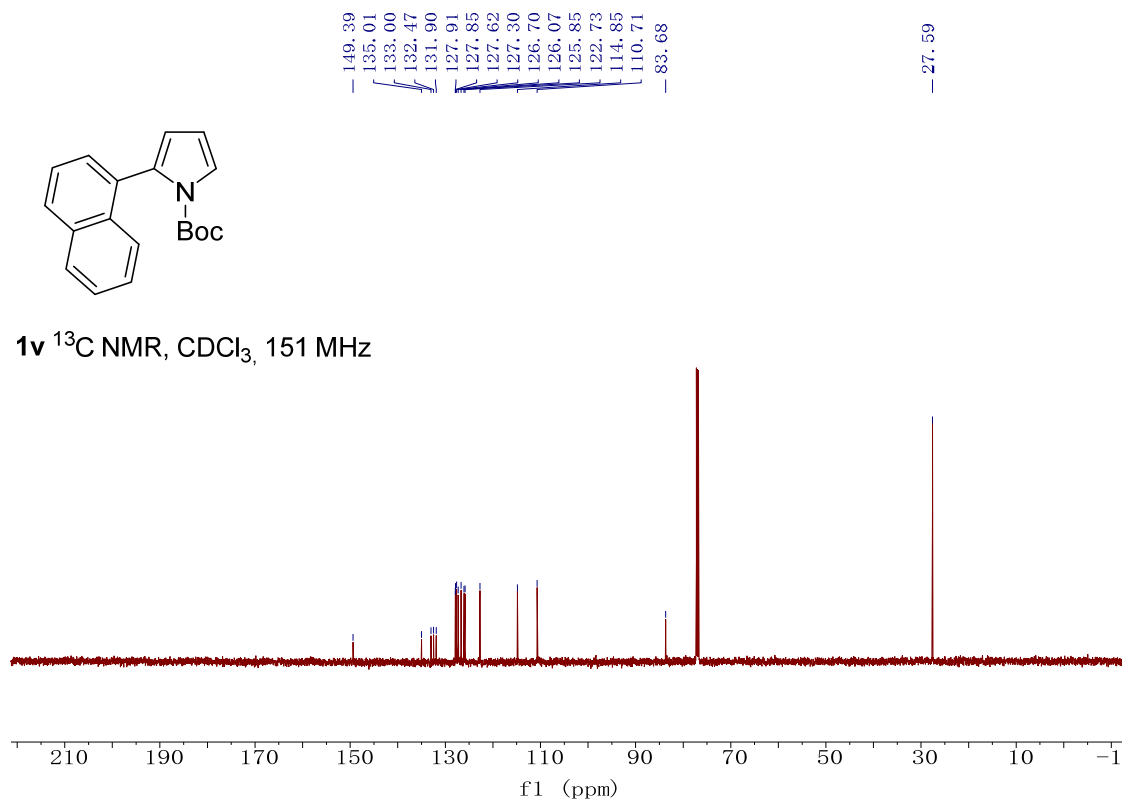

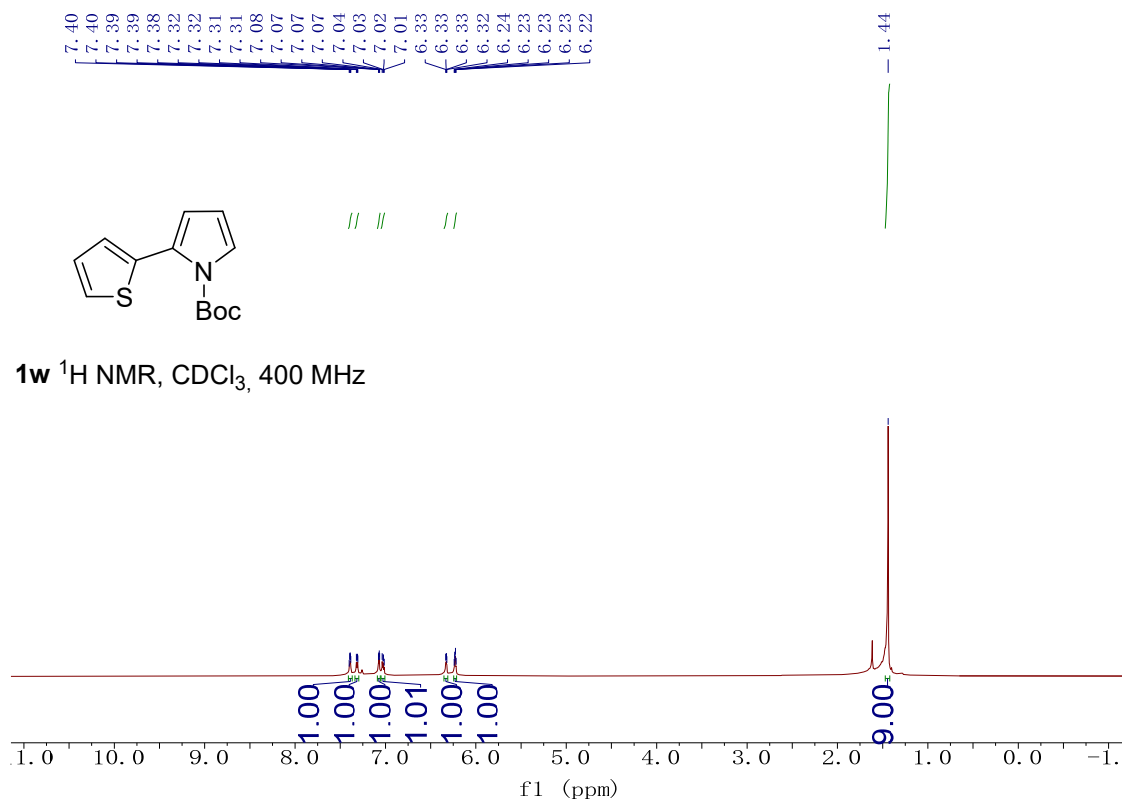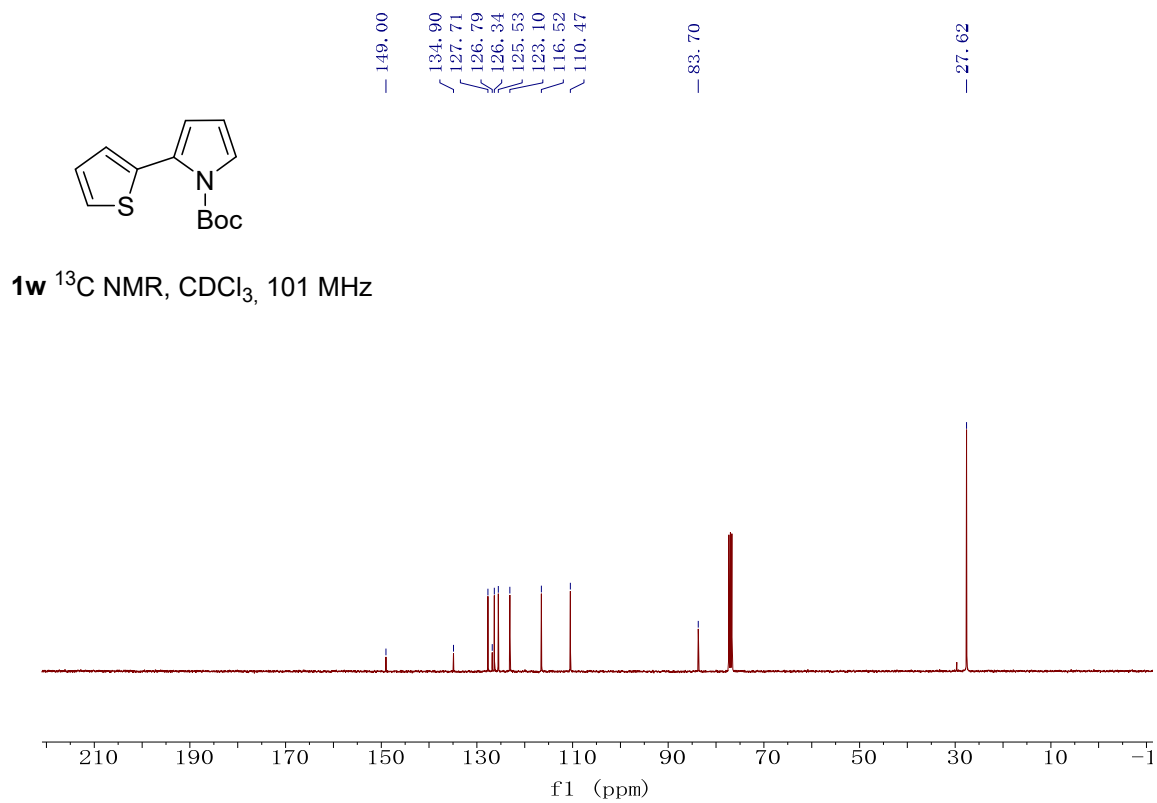



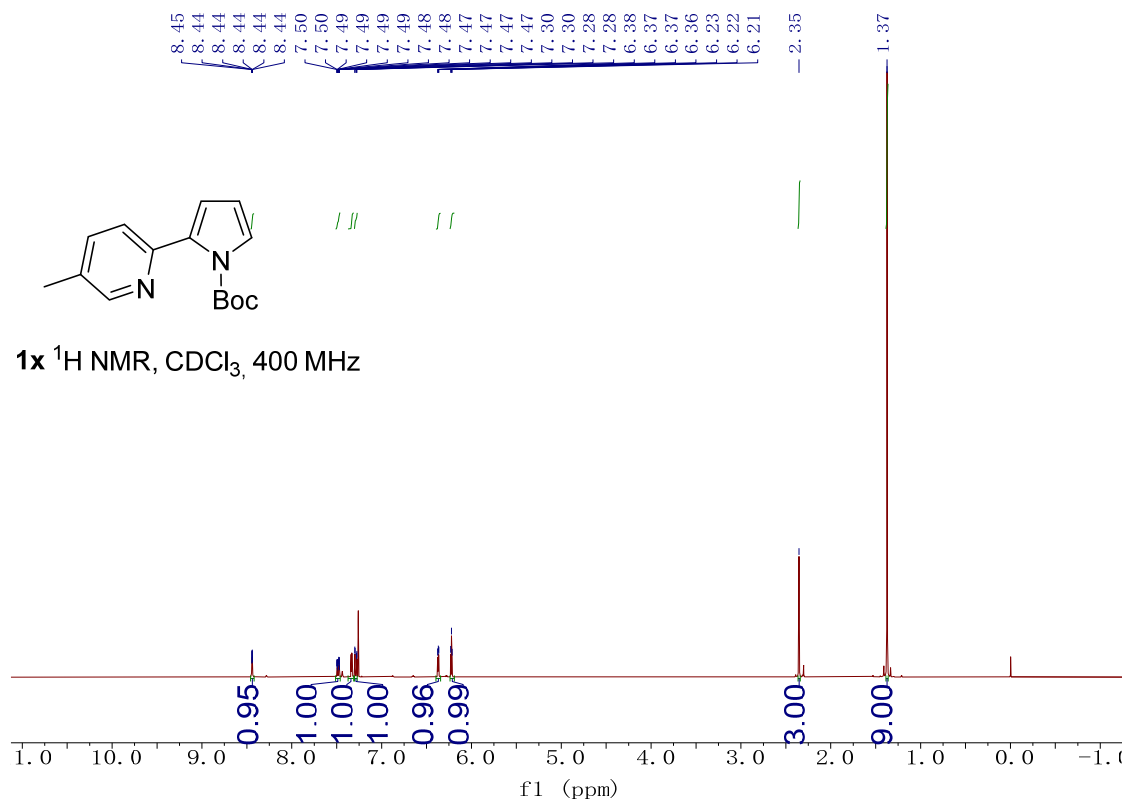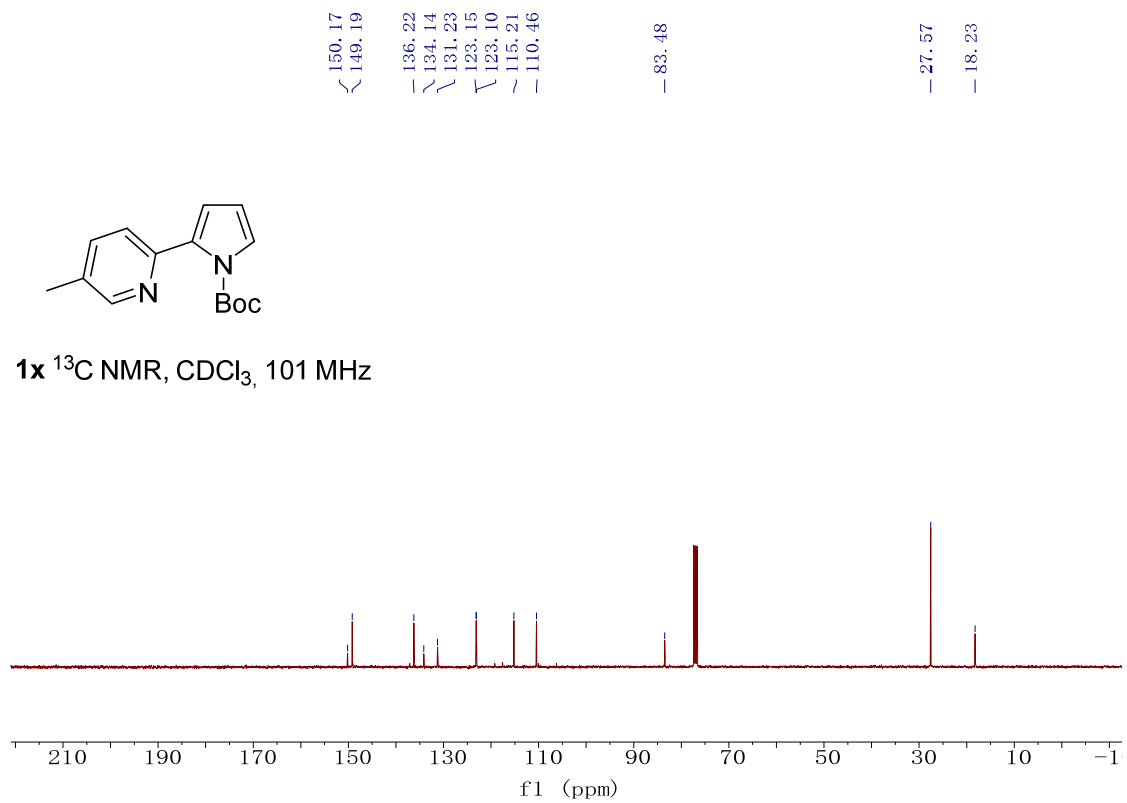

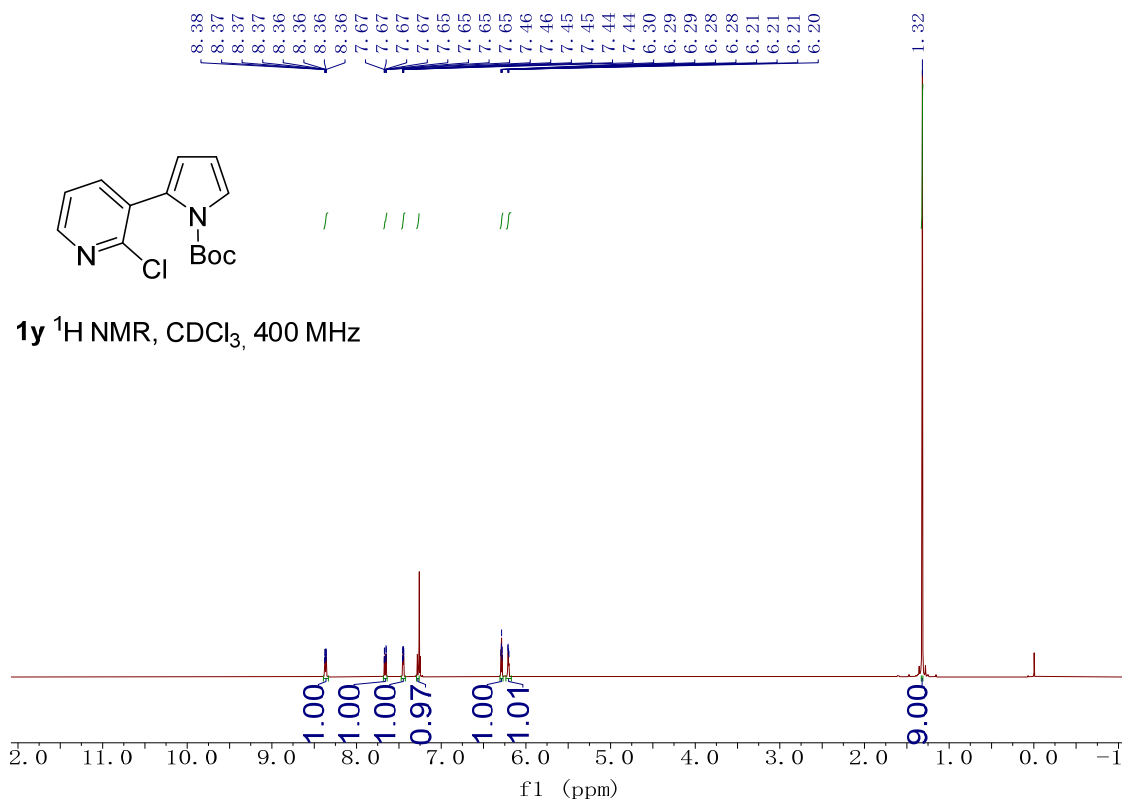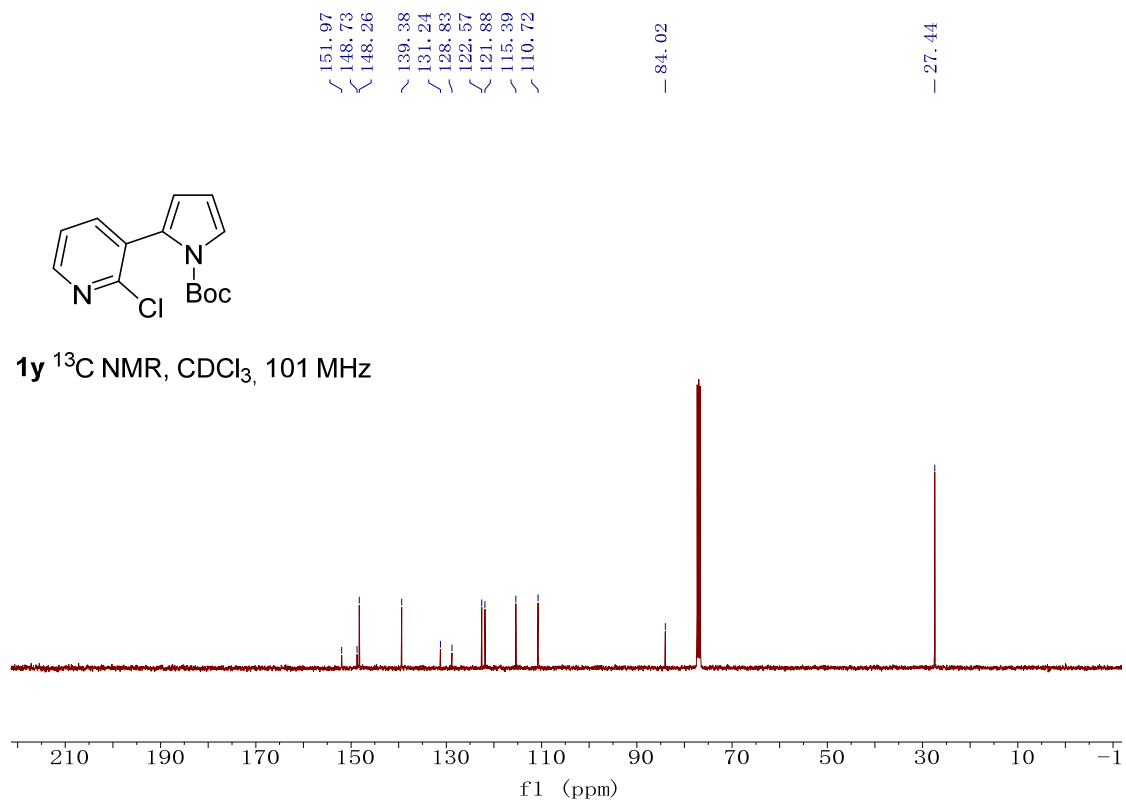

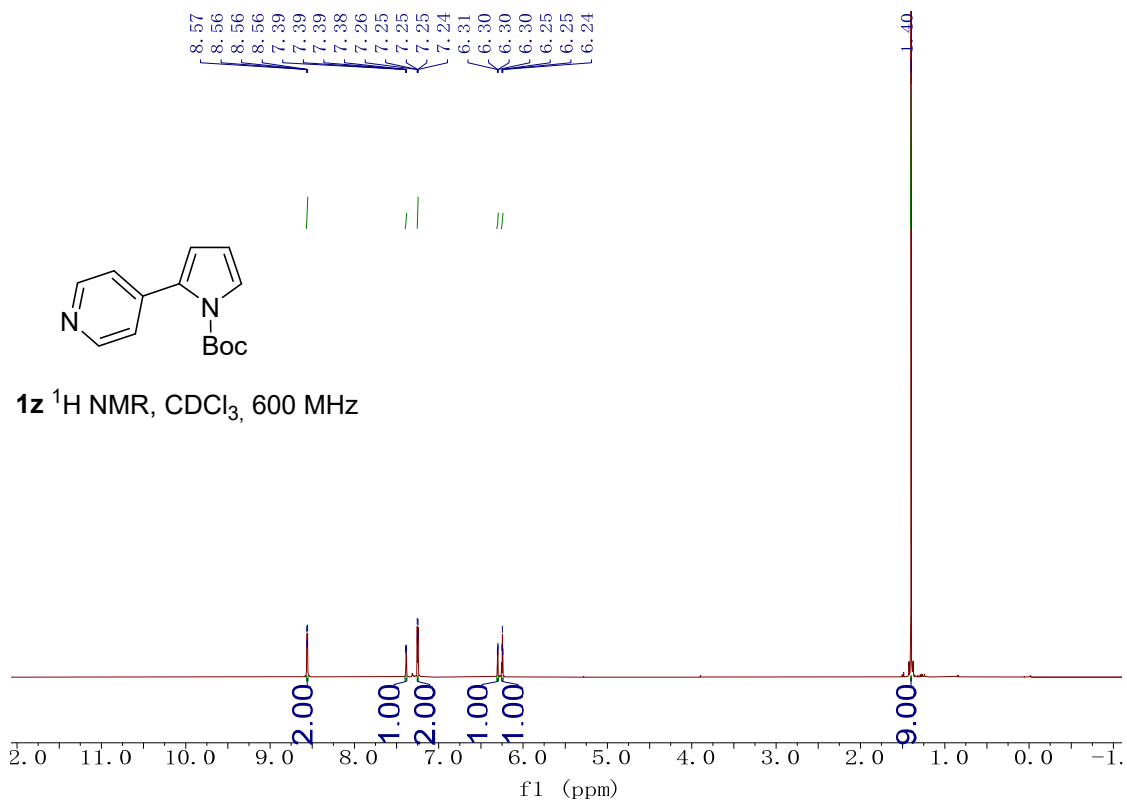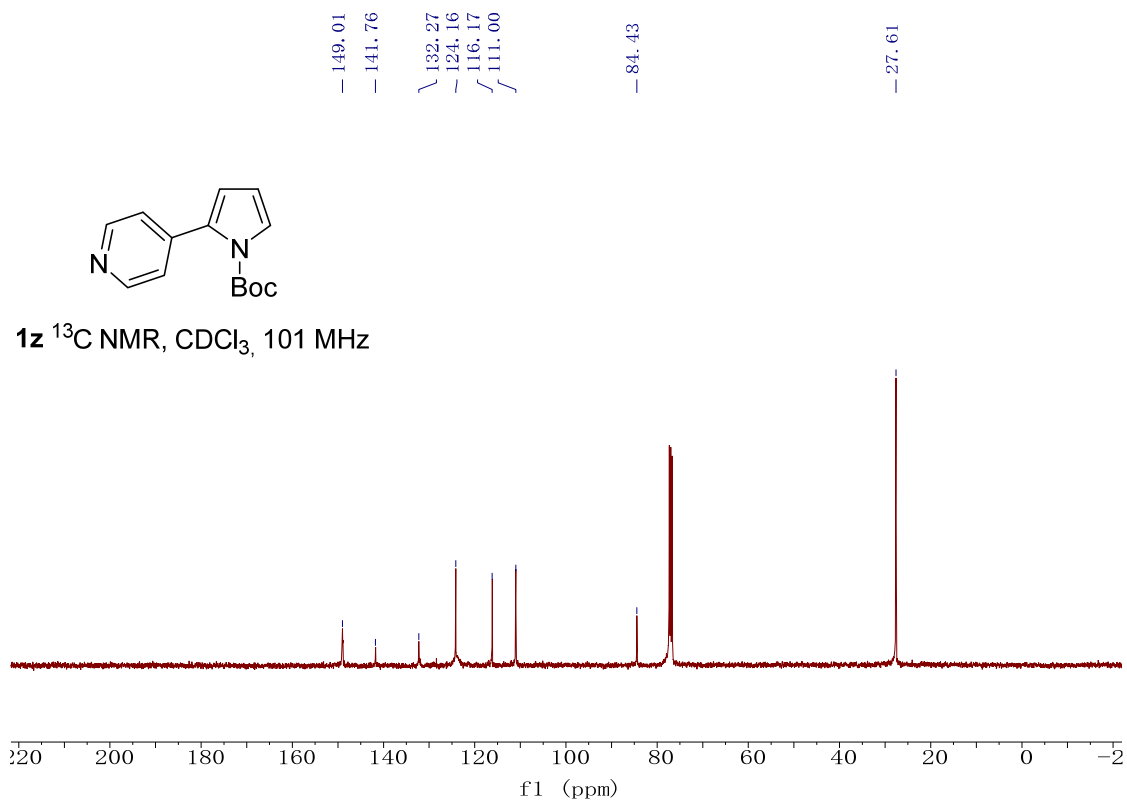

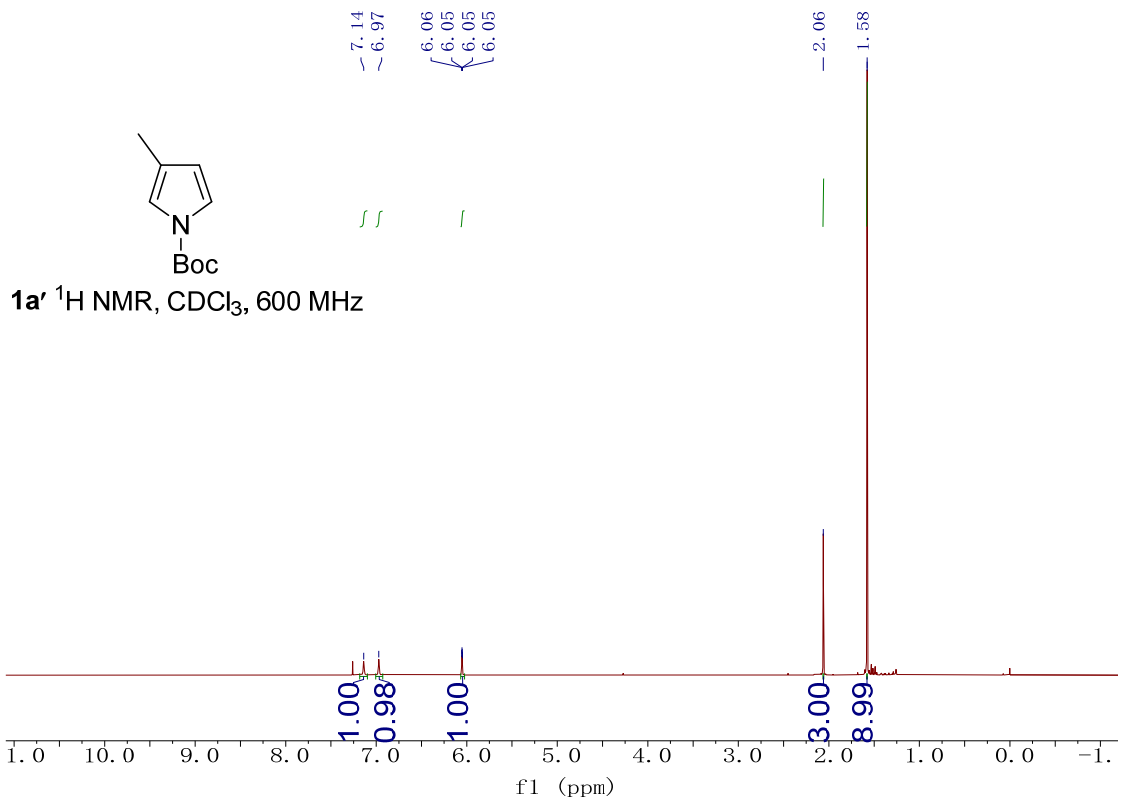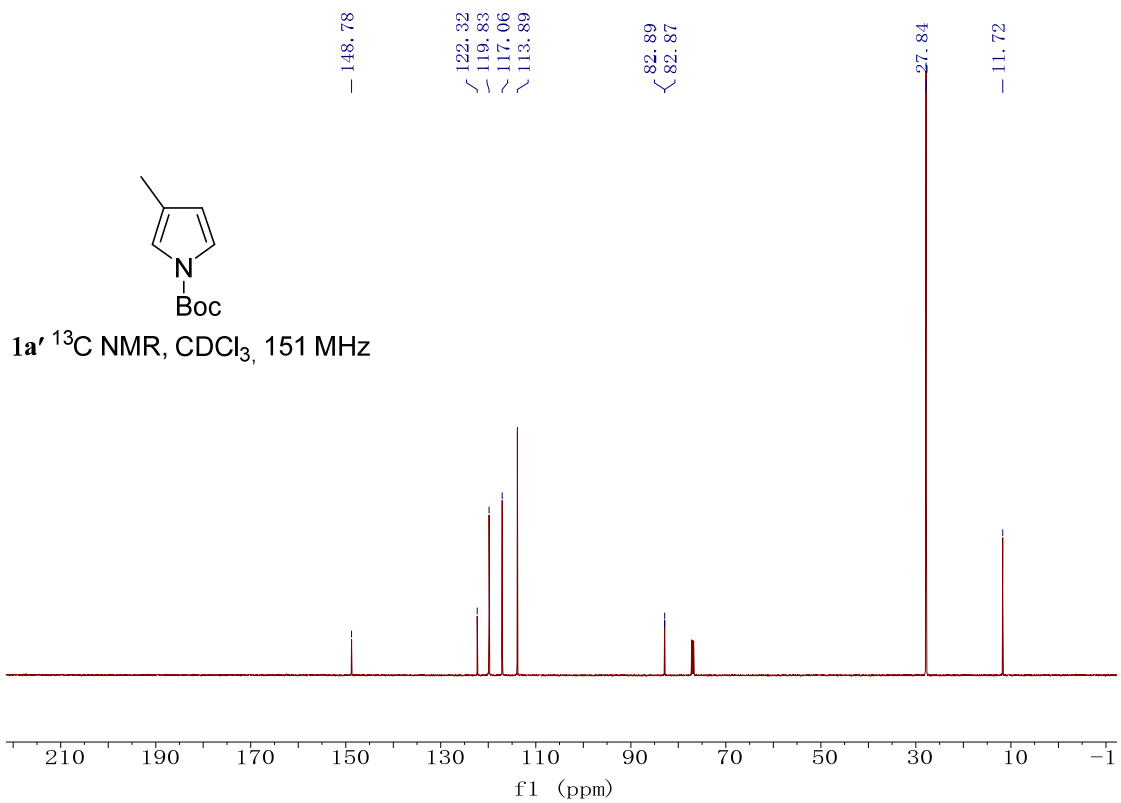

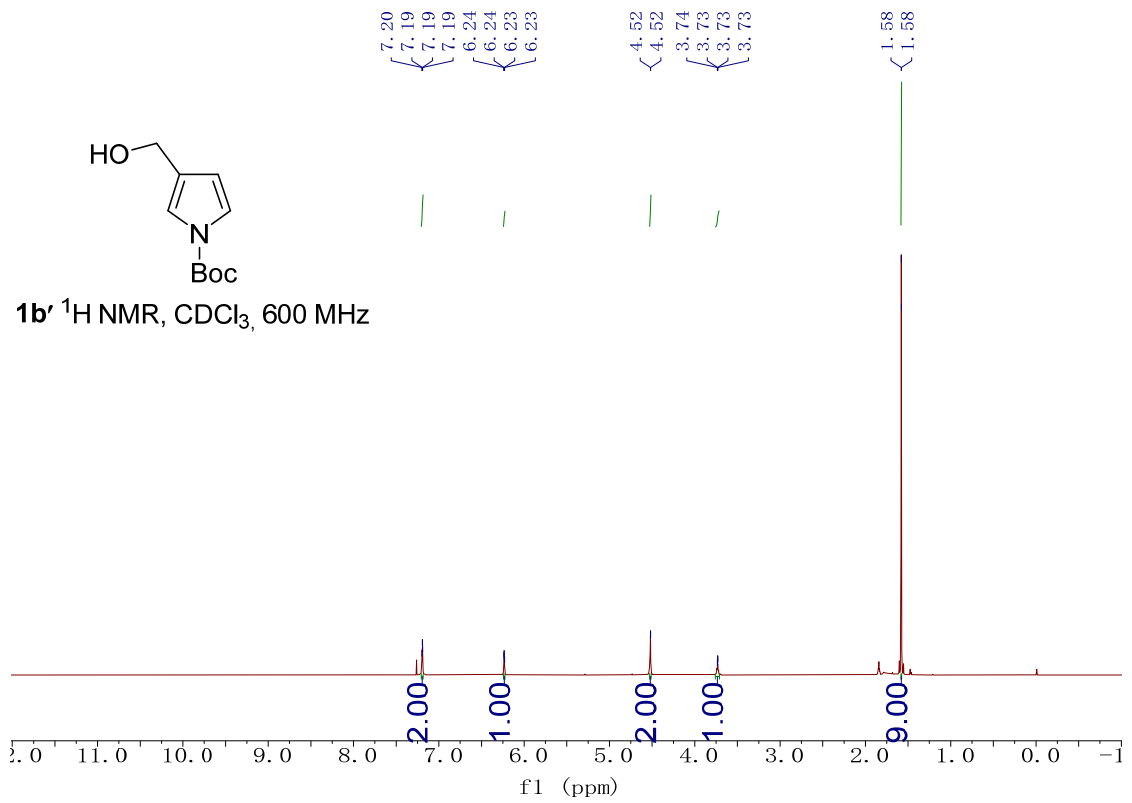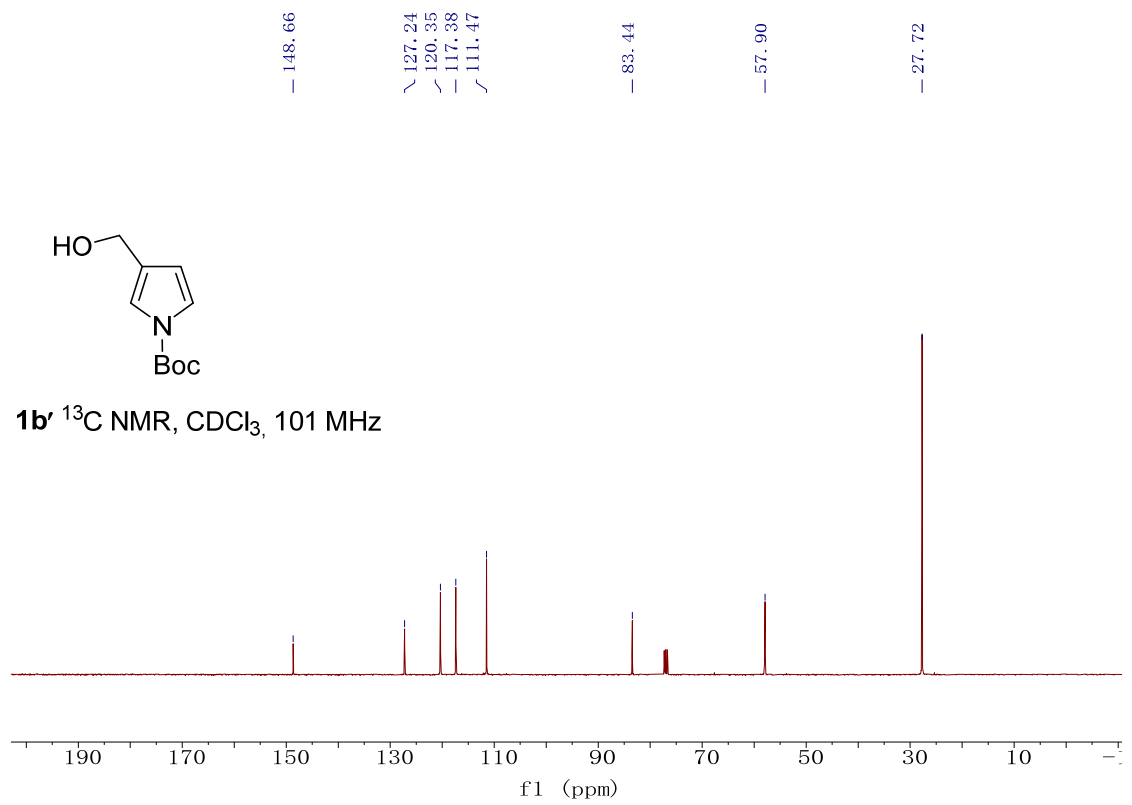

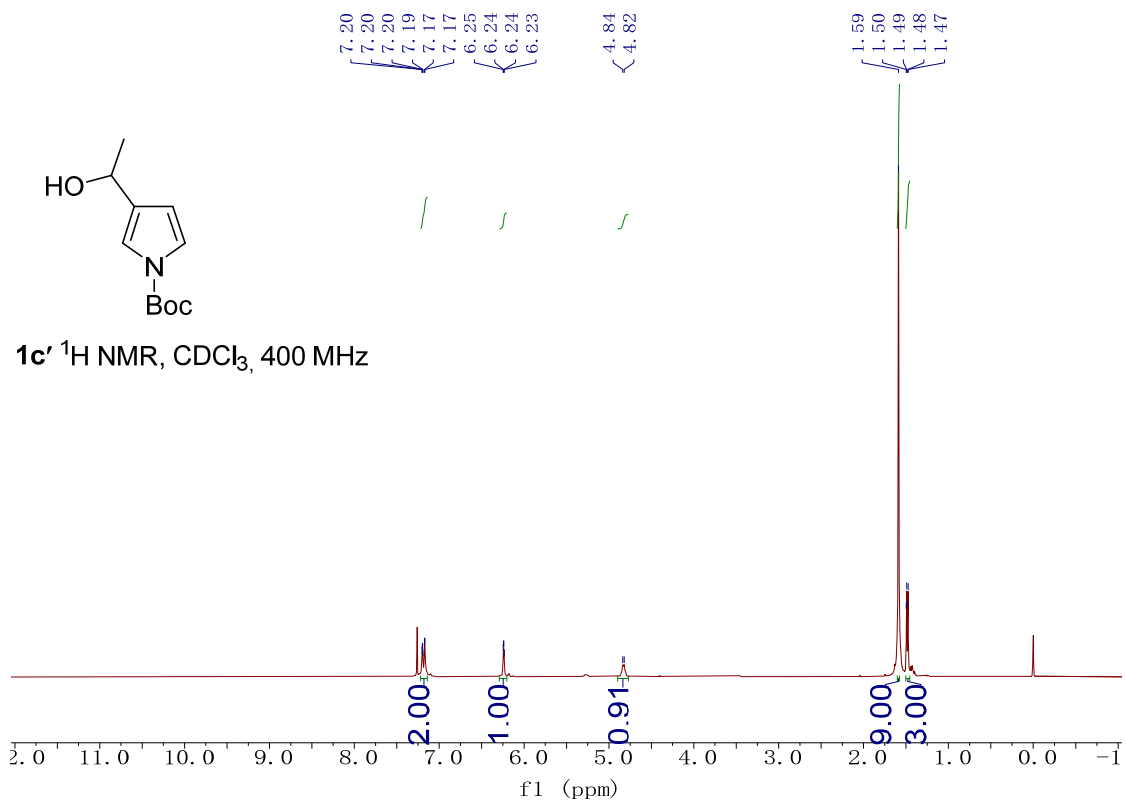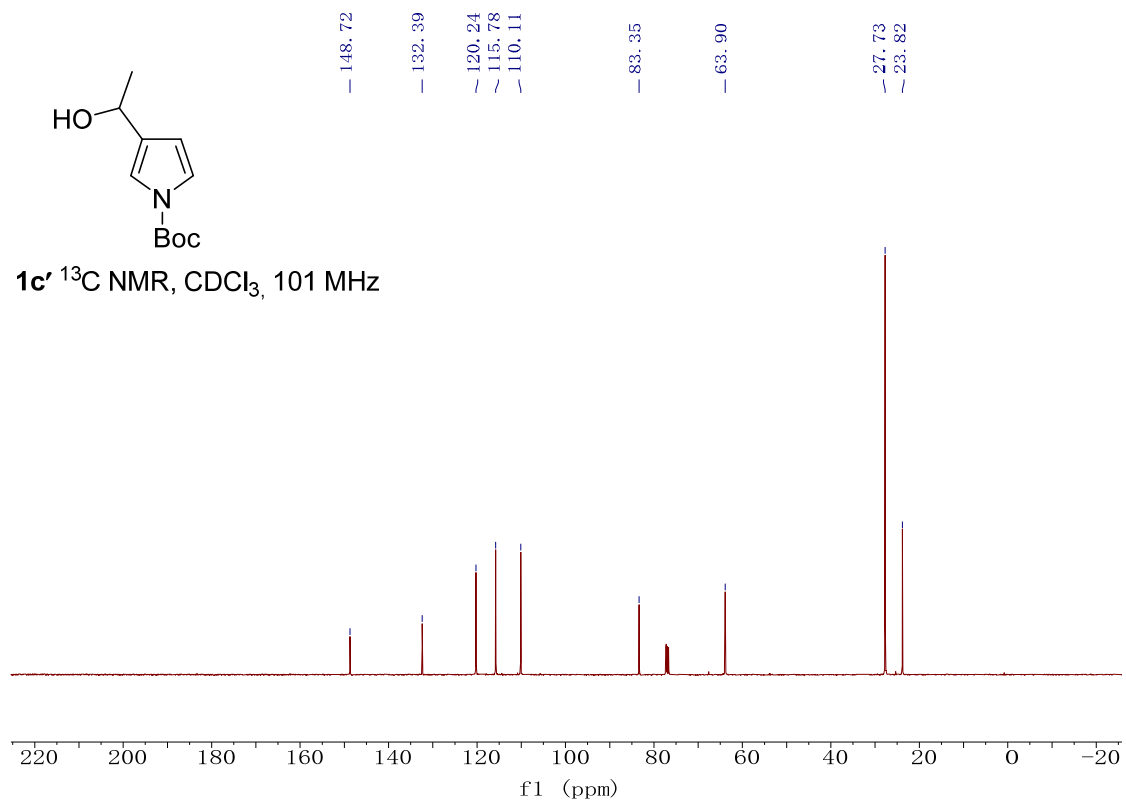

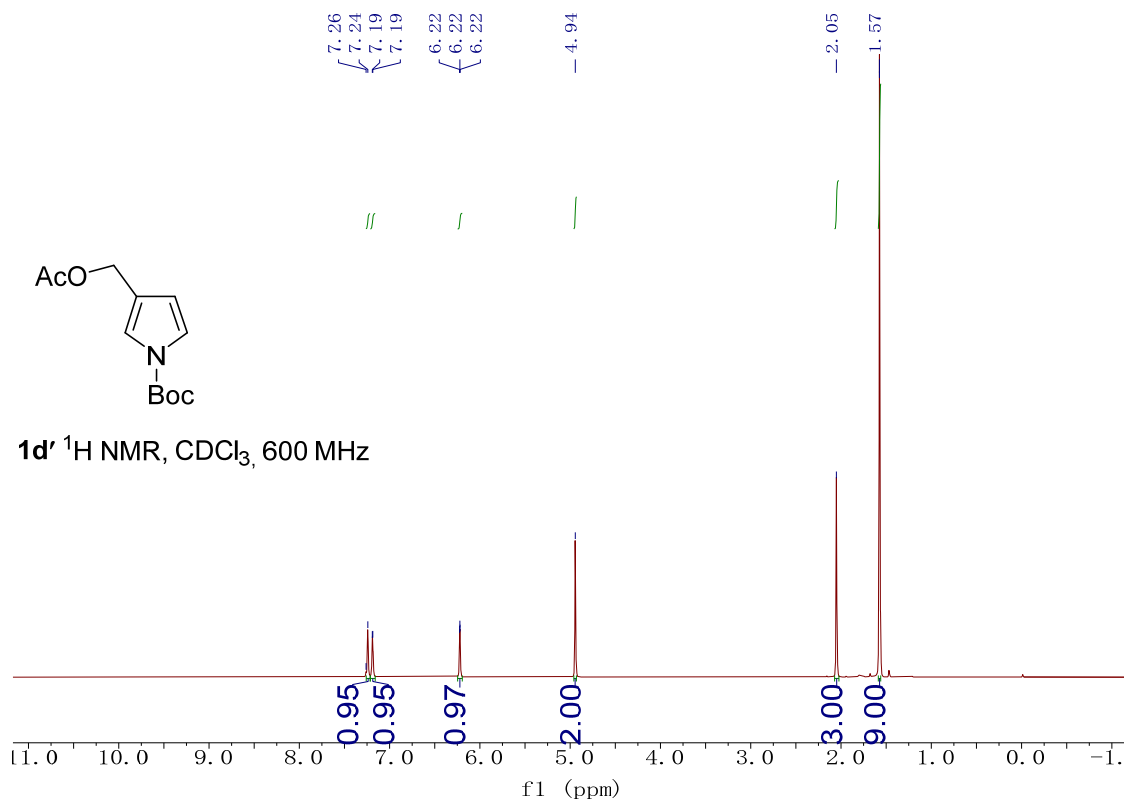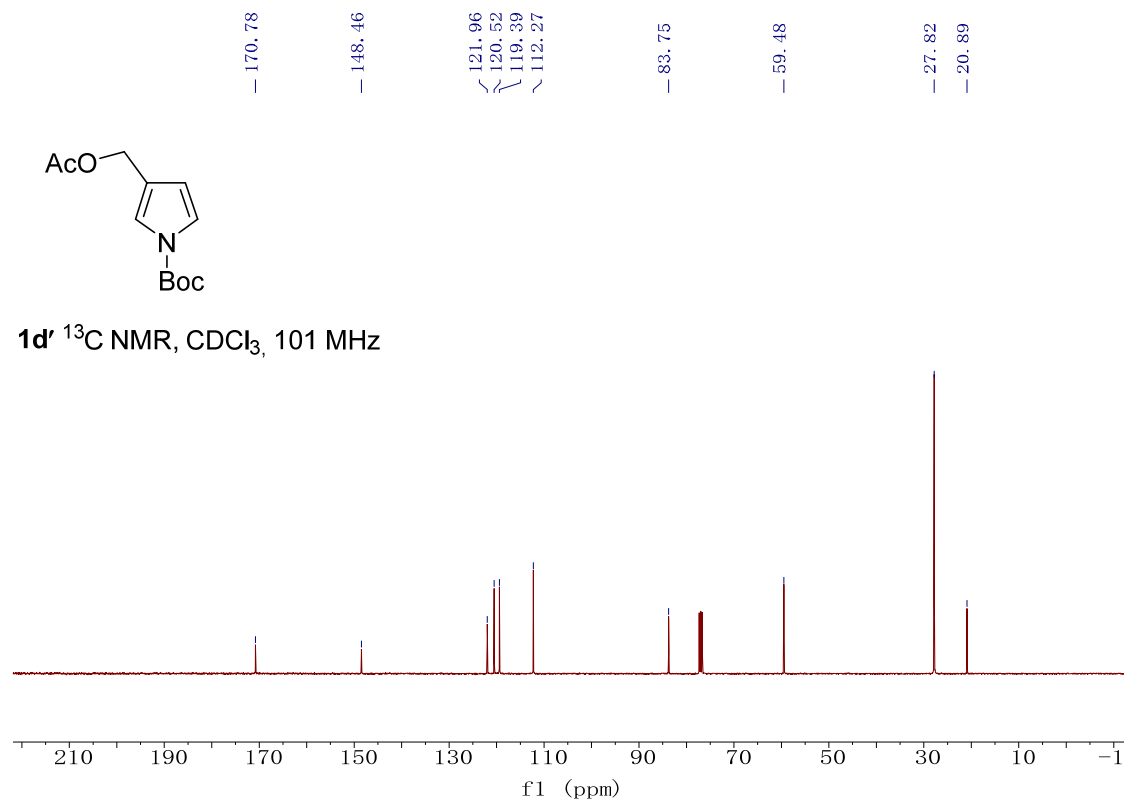

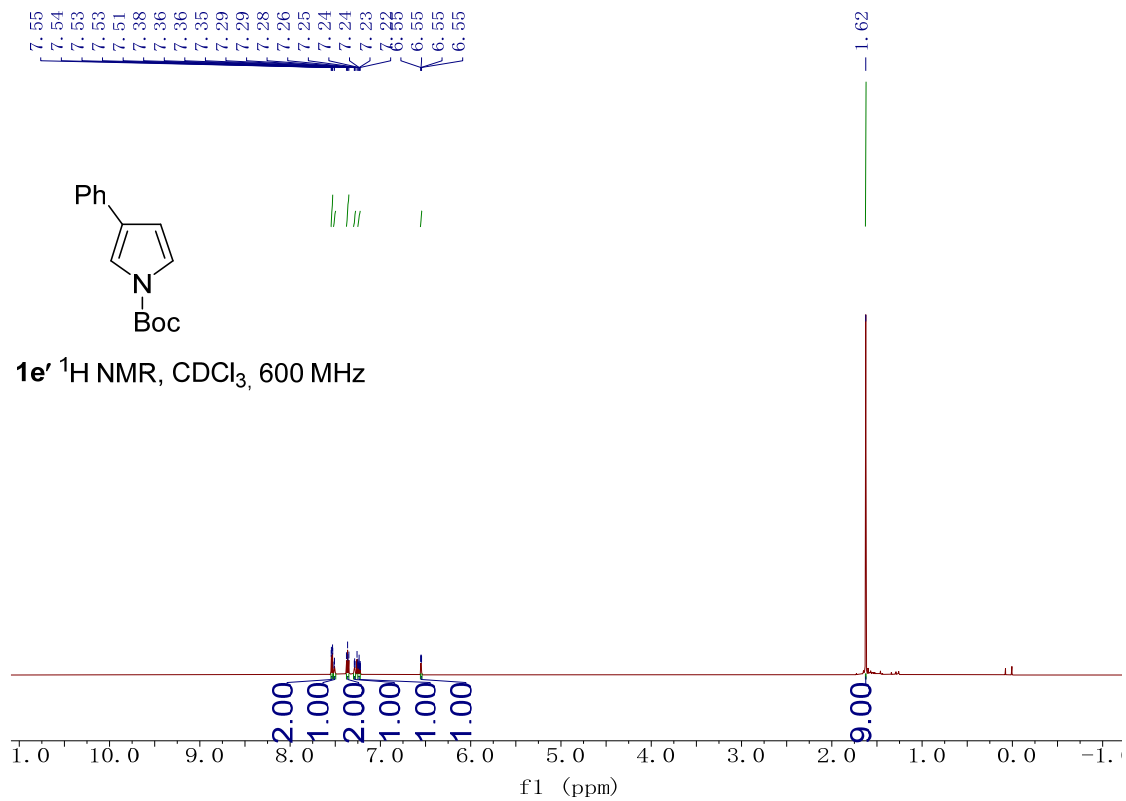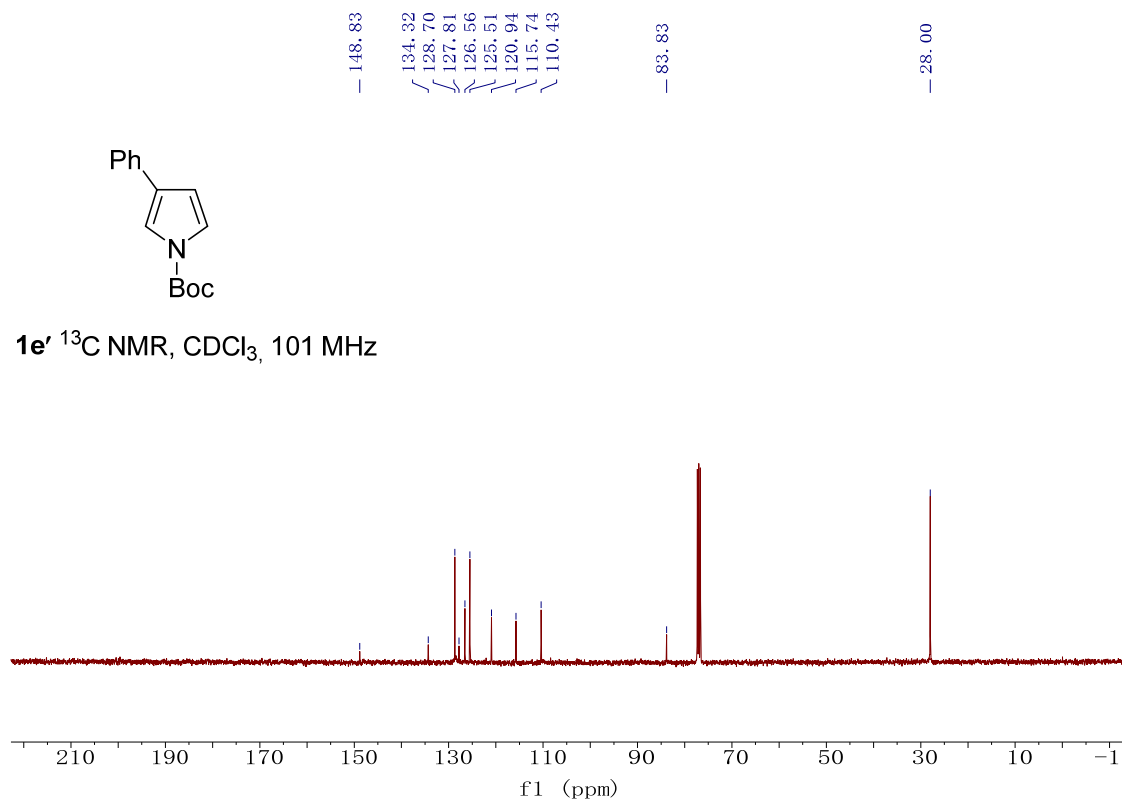



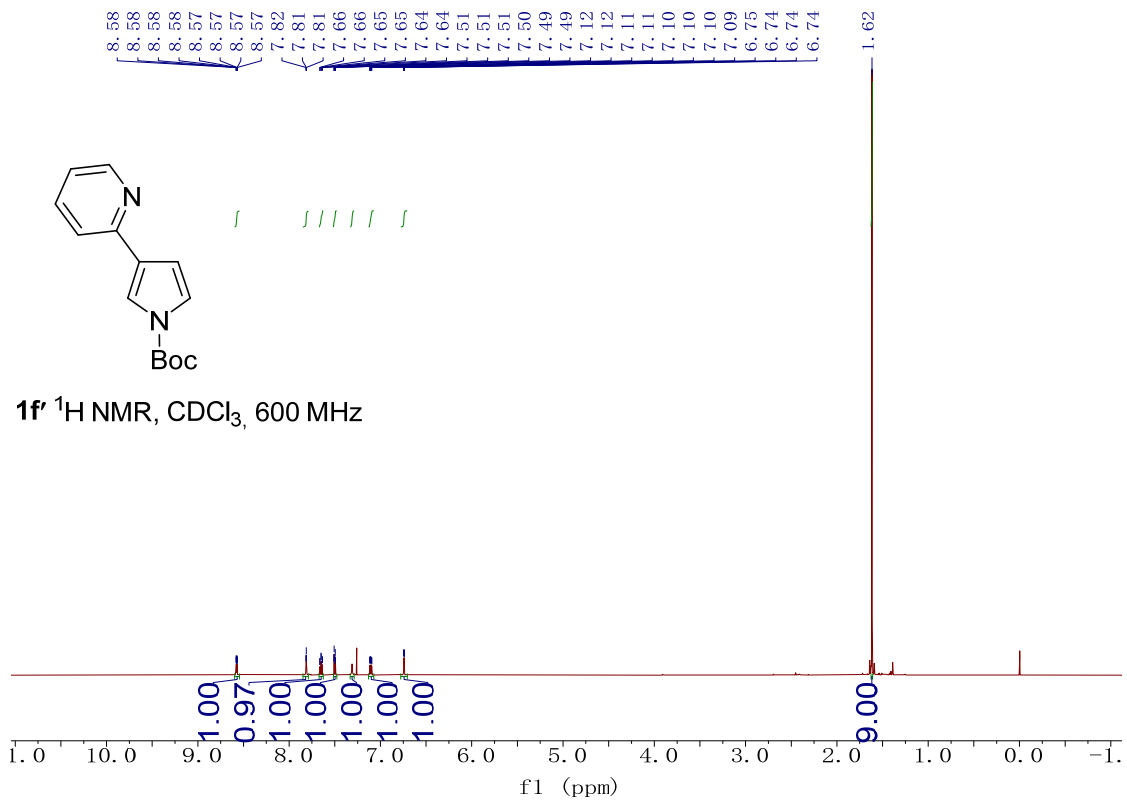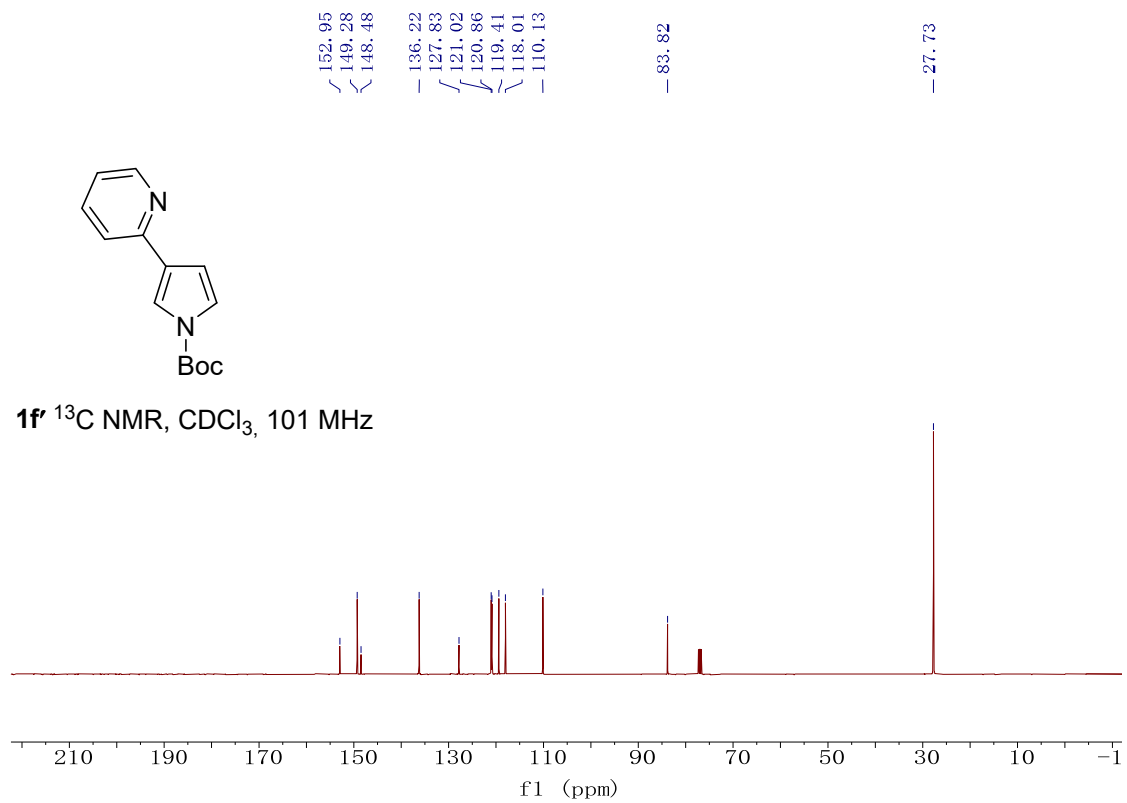

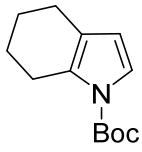

**1g'** <sup>1</sup>H NMR, CDCl<sub>3</sub>, 600 MHz

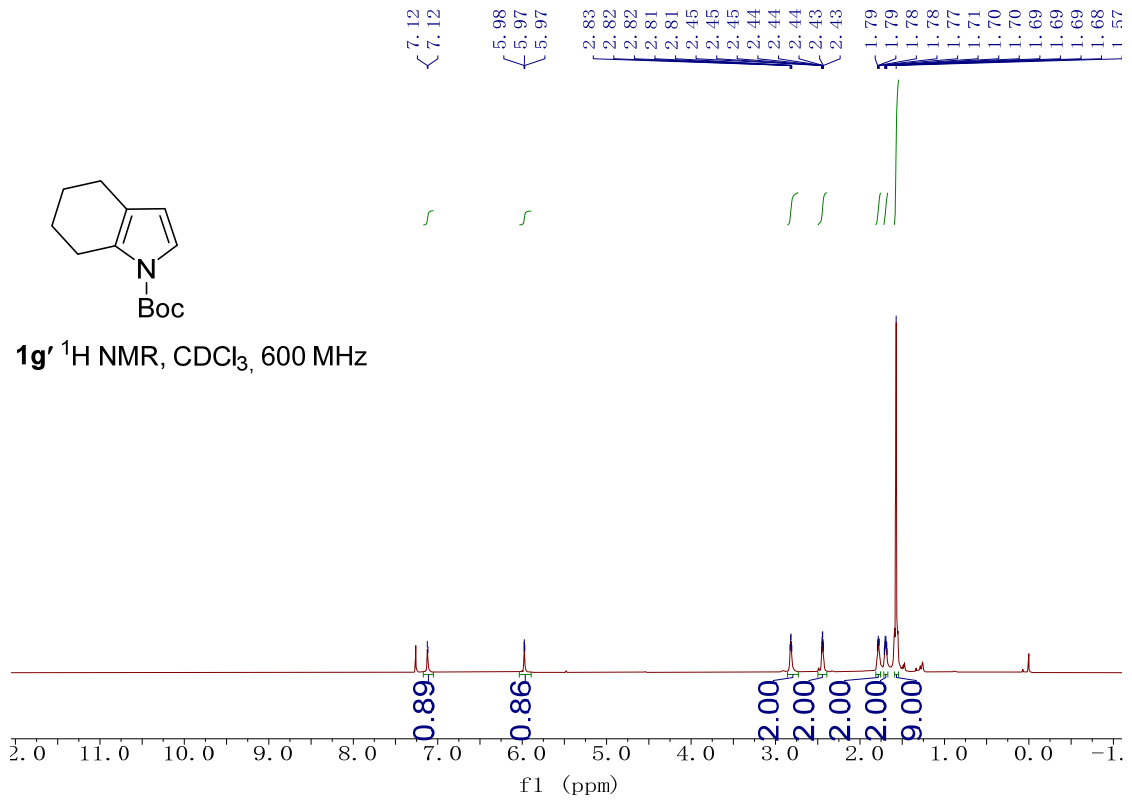

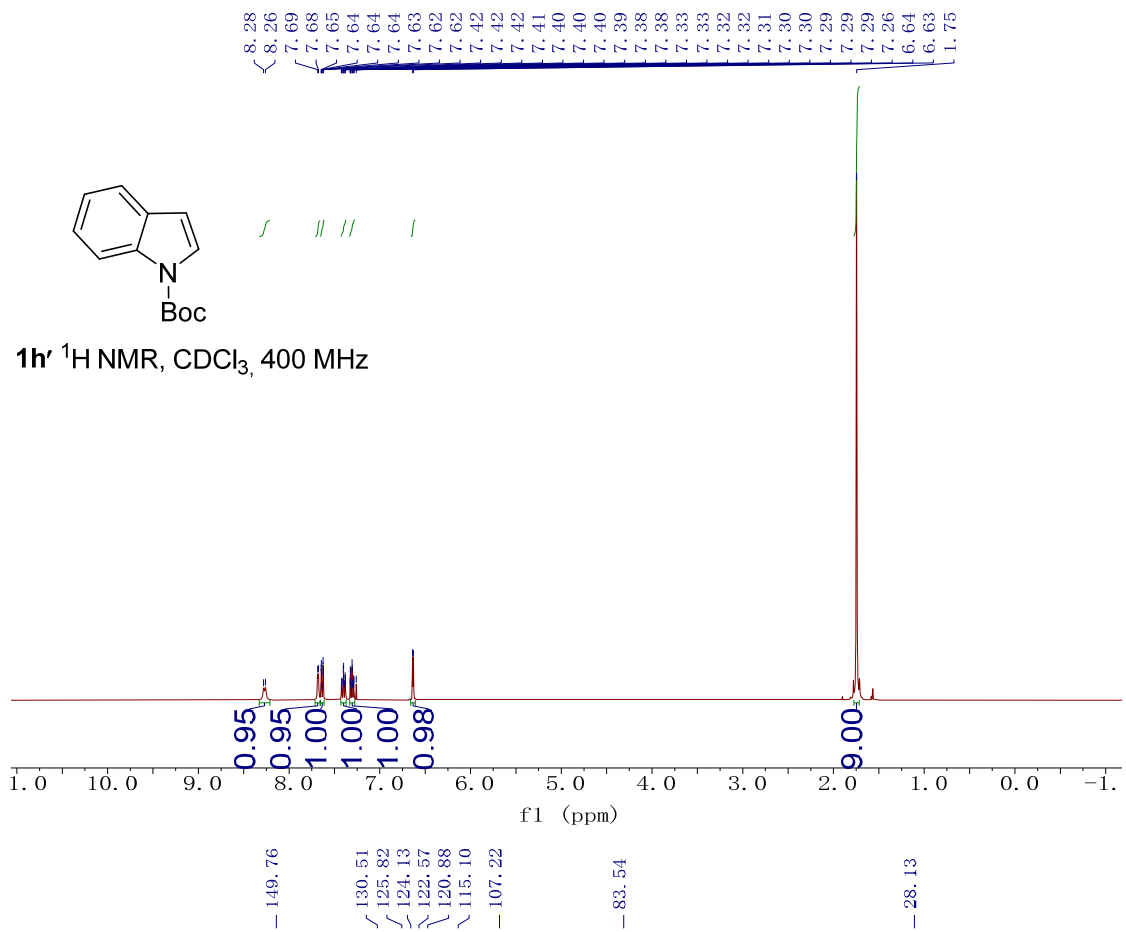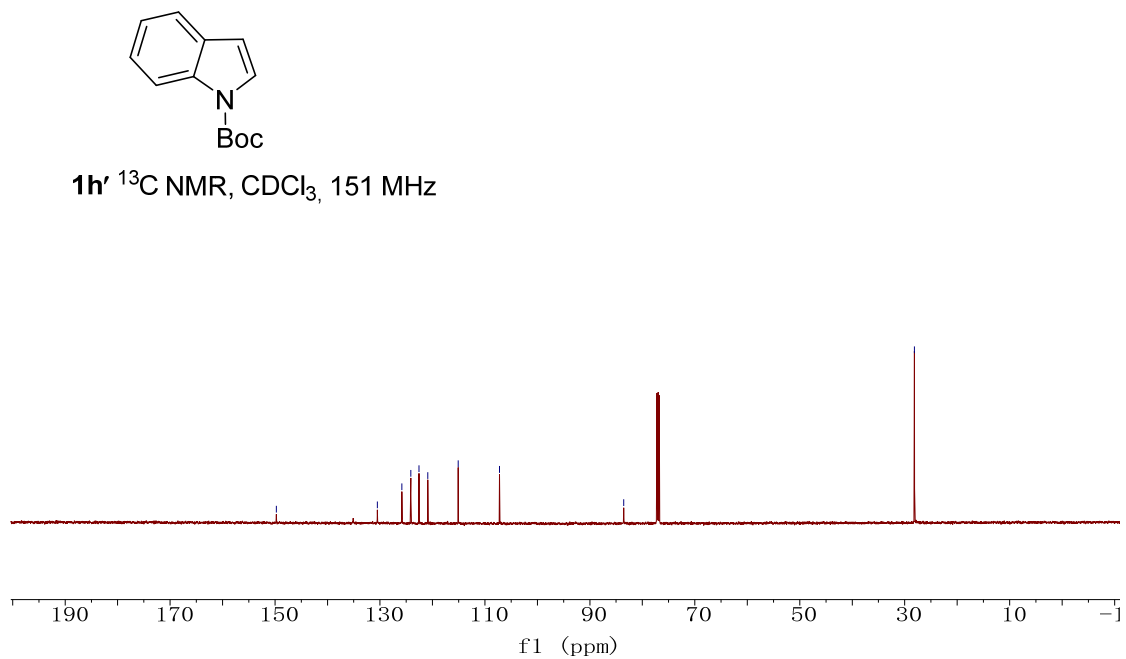

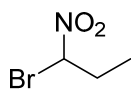

**2a**  $^1\text{H}$  NMR,  $\text{CDCl}_3$ , 600 MHz

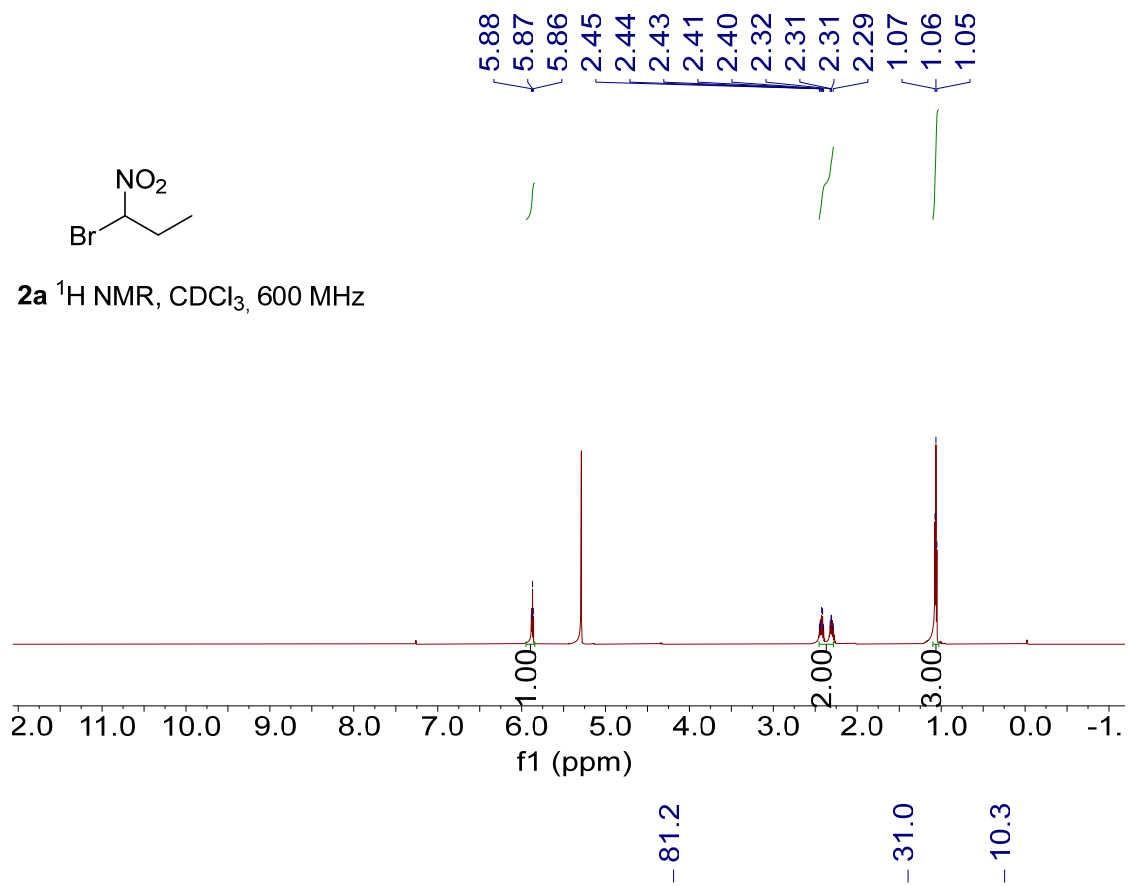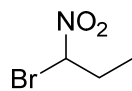

**2a**  $^{13}\text{C}$  NMR,  $\text{CDCl}_3$ , 150 MHz

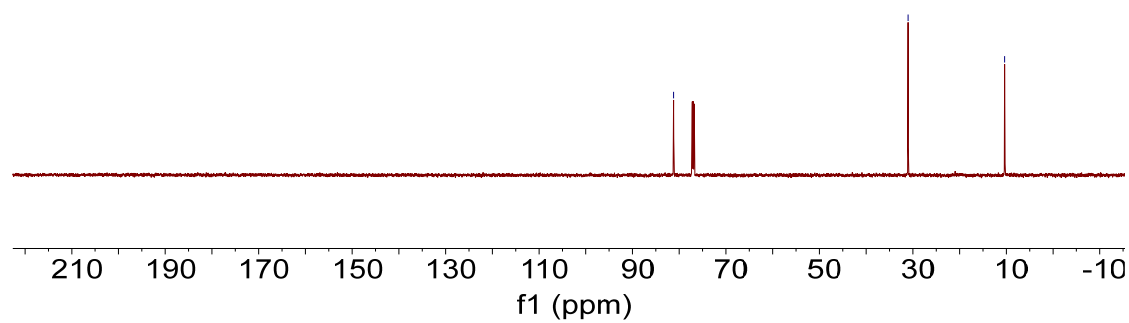

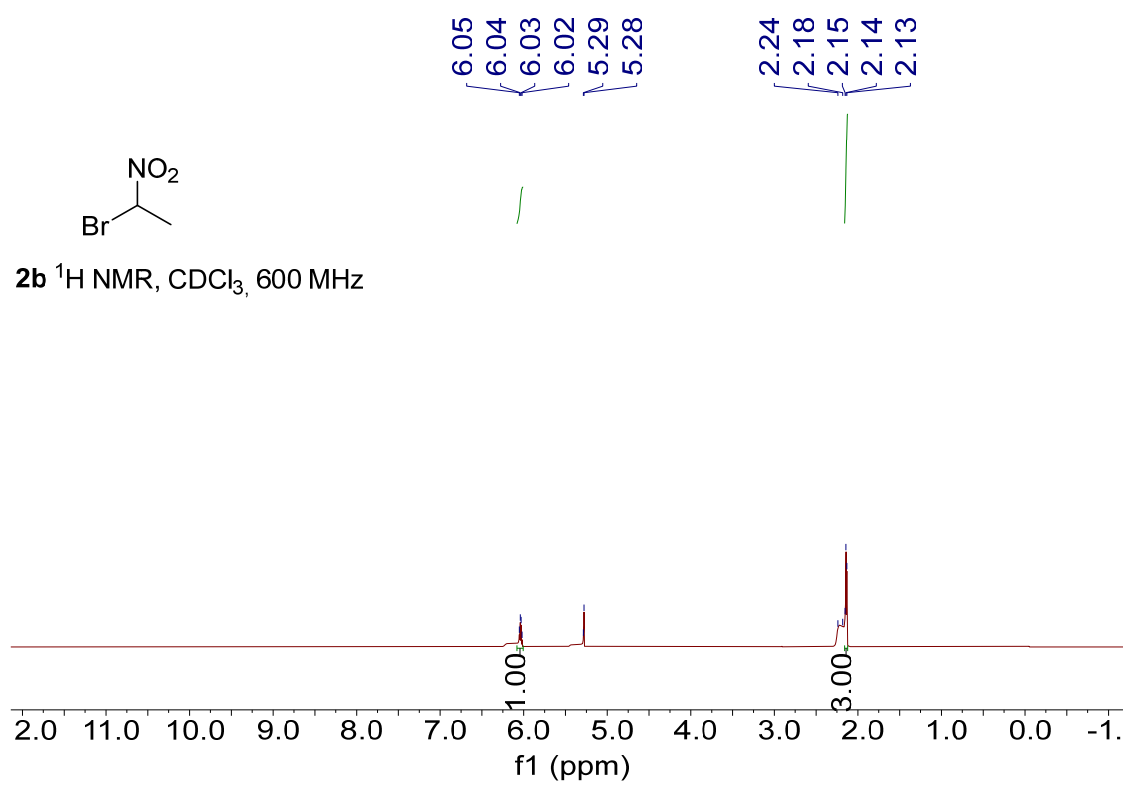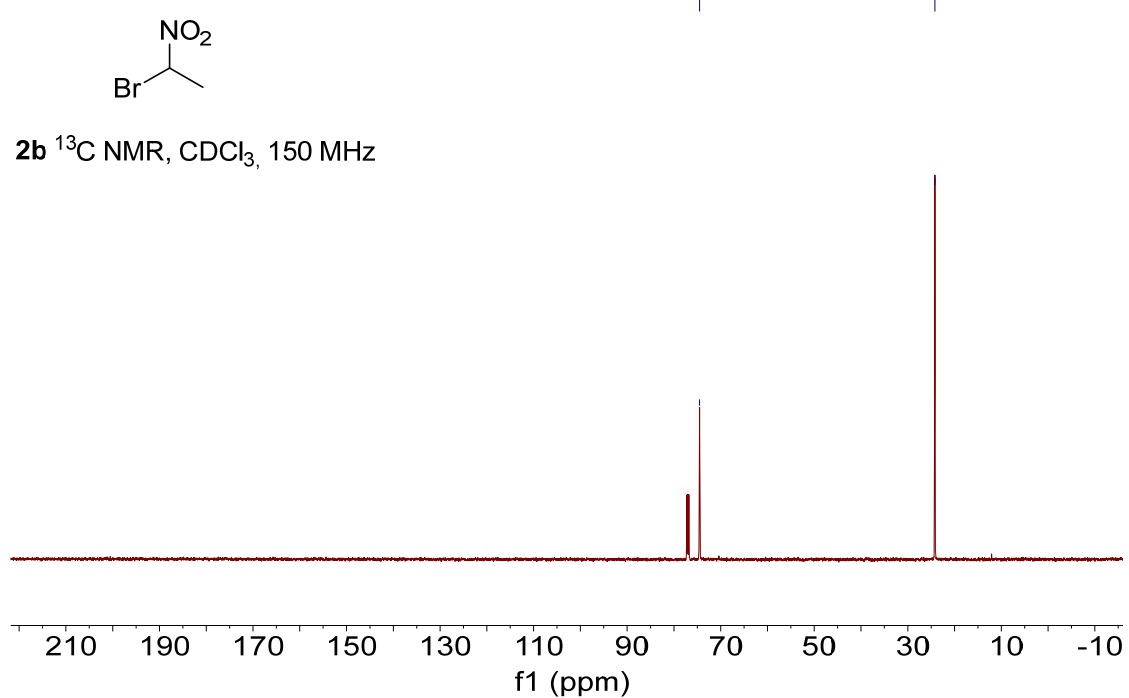

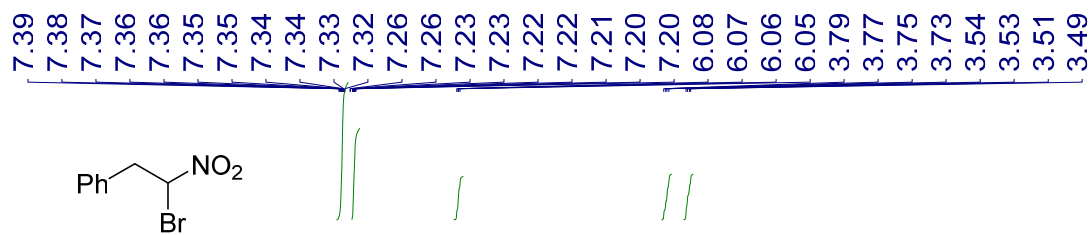

**2c**  $^1\text{H}$  NMR,  $\text{CDCl}_3$ , 400 MHz

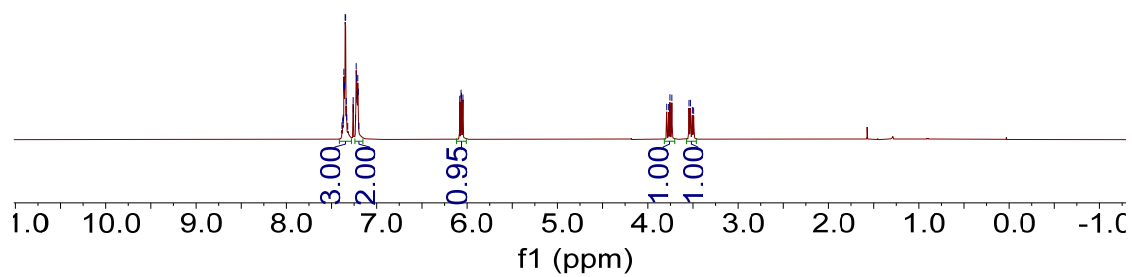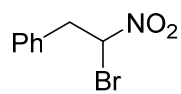

**2c**  $^{13}\text{C}$  NMR,  $\text{CDCl}_3$ , 100 MHz

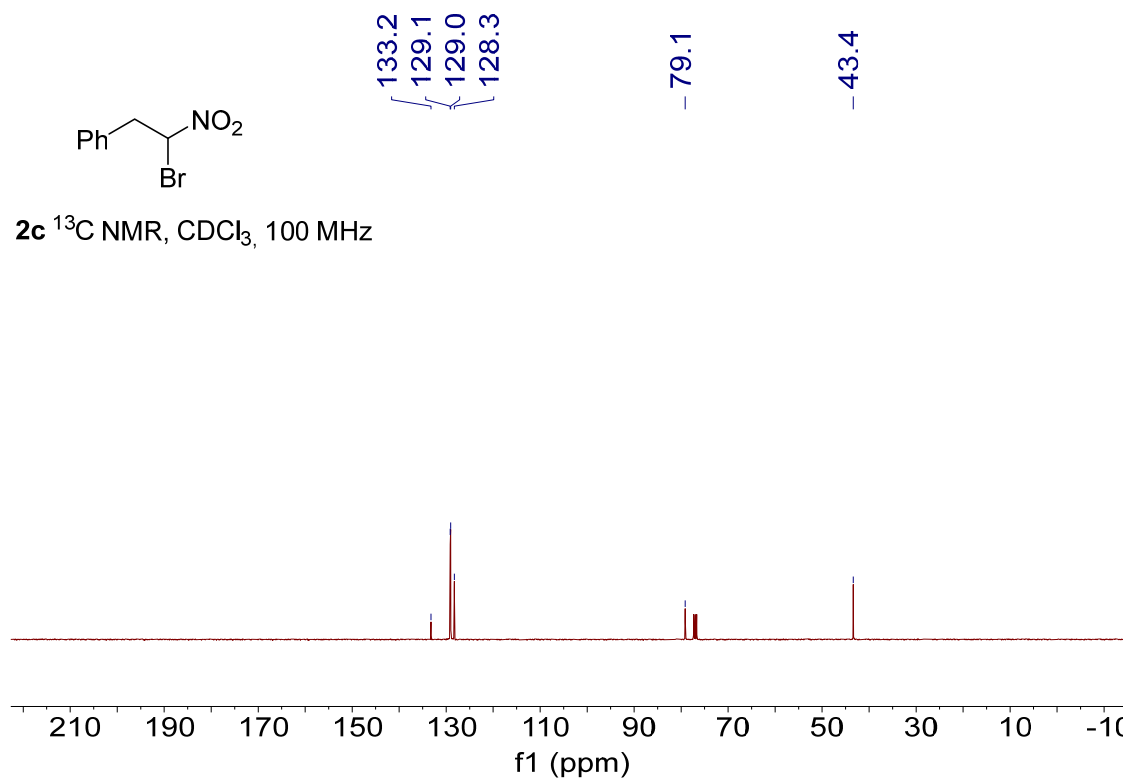

6.05  
6.04  
6.03  
6.02  
6.02  
6.01  
6.00  
5.99  
4.74  
4.74  
4.66  
4.65  
4.43  
4.41  
4.40  
4.38  
4.30  
4.28  
4.27  
4.25  
4.09  
4.08  
3.81  
3.57  
3.56  
3.56  
3.56  
3.55  
3.55  
3.54  
3.54  
3.53  
3.53  
1.75  
1.74  
1.73  
1.72  
1.71  
1.71  
1.70  
1.70  
1.68  
1.67  
1.66  
1.65  
1.65  
1.65  
1.64  
1.62  
1.61  
1.61  
1.60  
1.59

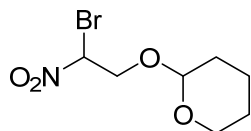

**2d**  $^1\text{H}$  NMR,  $\text{CDCl}_3$ , 400 MHz

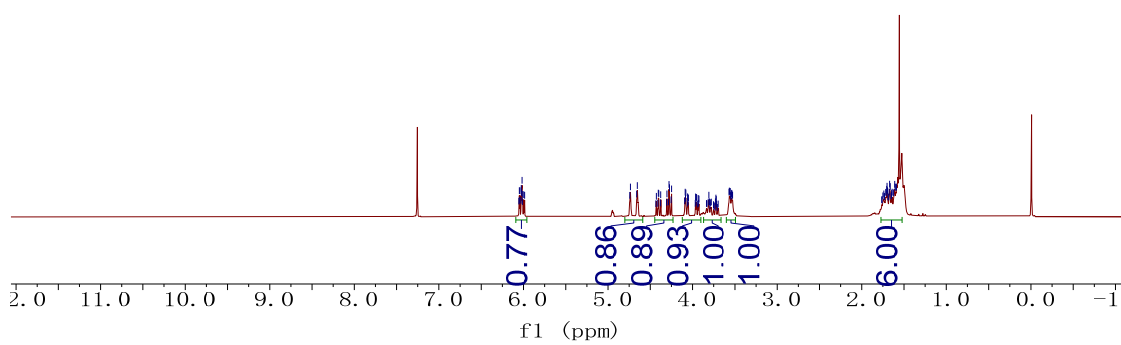

— 100.46

— 69.73

— 62.61

— 30.02

— 25.00

— 18.93

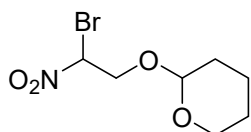

**2d**  $^{13}\text{C}$  NMR,  $\text{CDCl}_3$ , 101 MHz

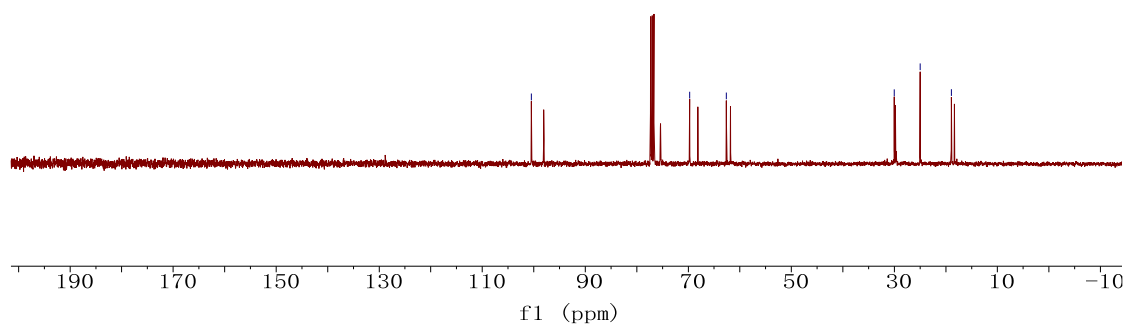

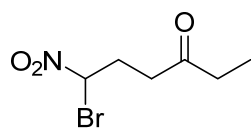

**2e**  $^1\text{H}$  NMR,  $\text{CDCl}_3$ , 400 MHz

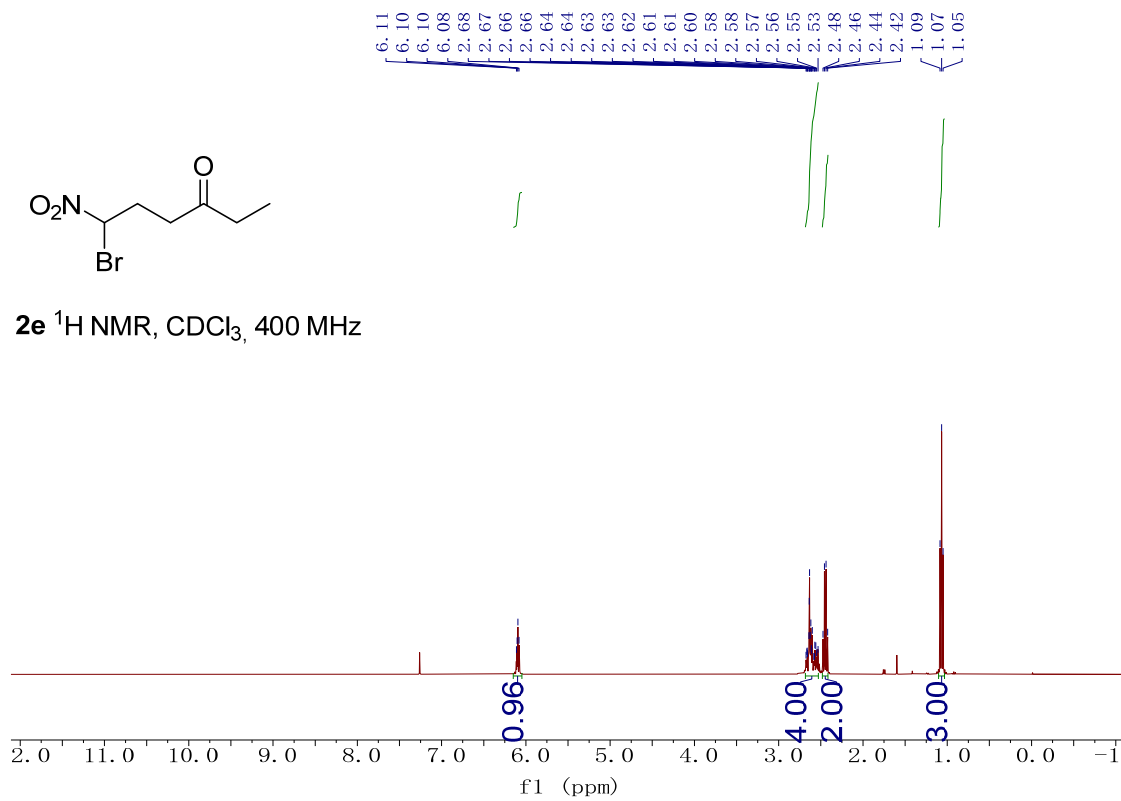

— 208.26

— 78.94

~ 37.52

~ 35.95

~ 31.18

— 7.65

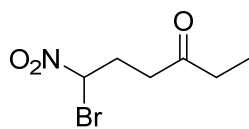

**2e**  $^{13}\text{C}$  NMR,  $\text{CDCl}_3$ , 101 MHz

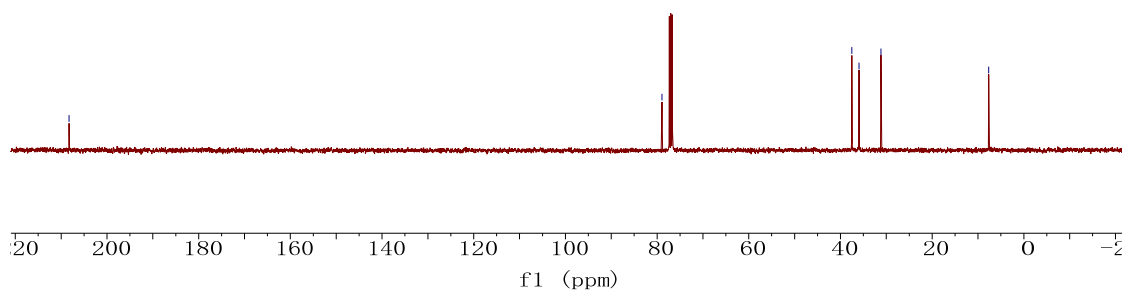



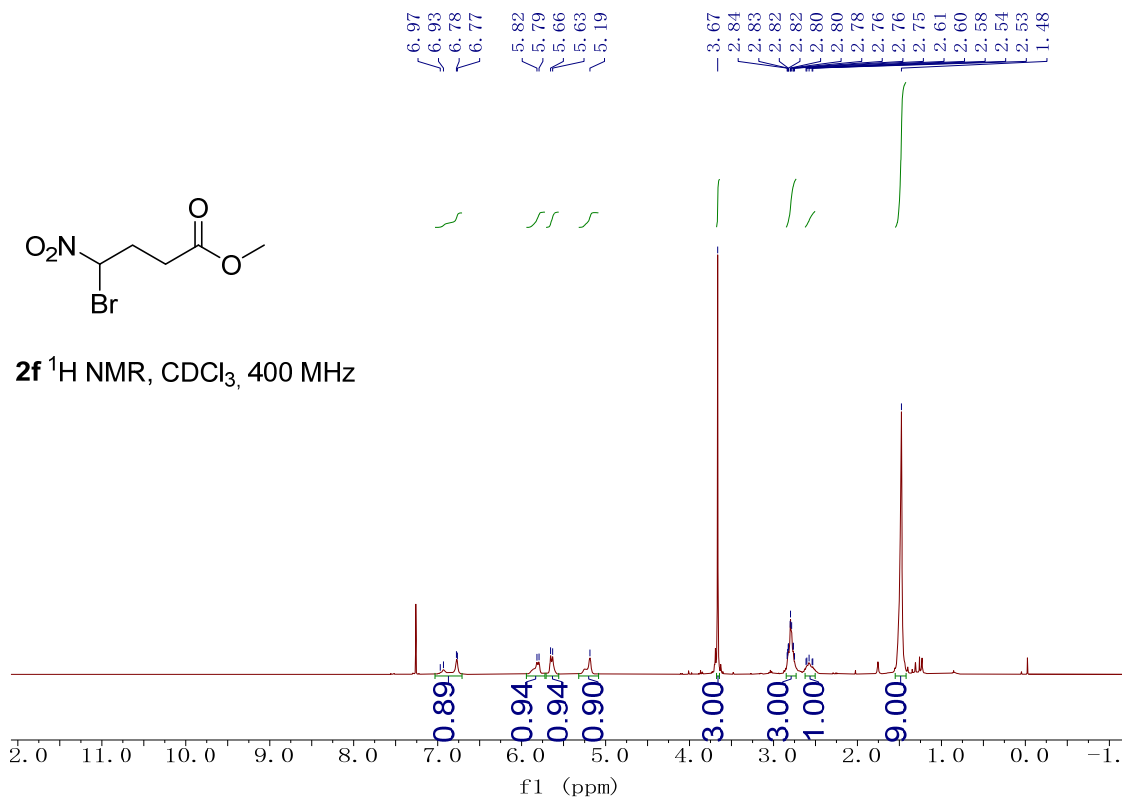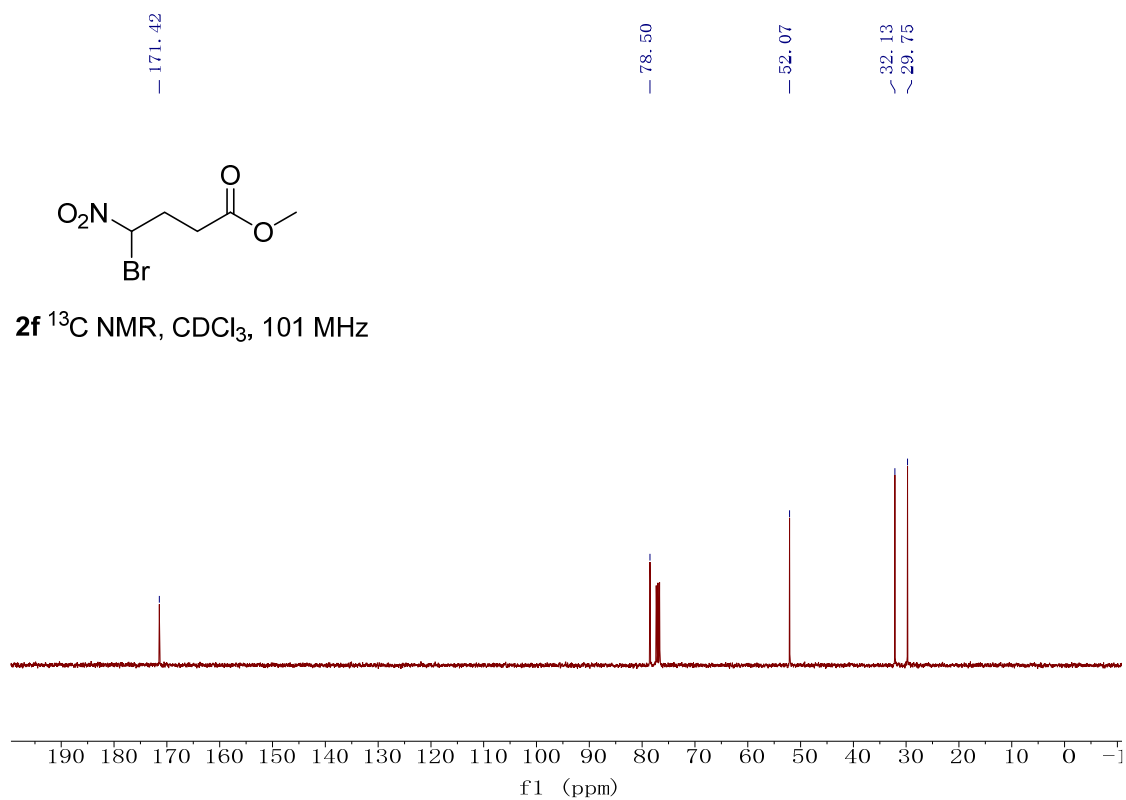

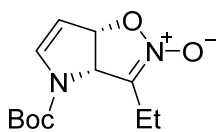

**3aa**  $^1\text{H}$  NMR,  $\text{CDCl}_3$ , 400 MHz

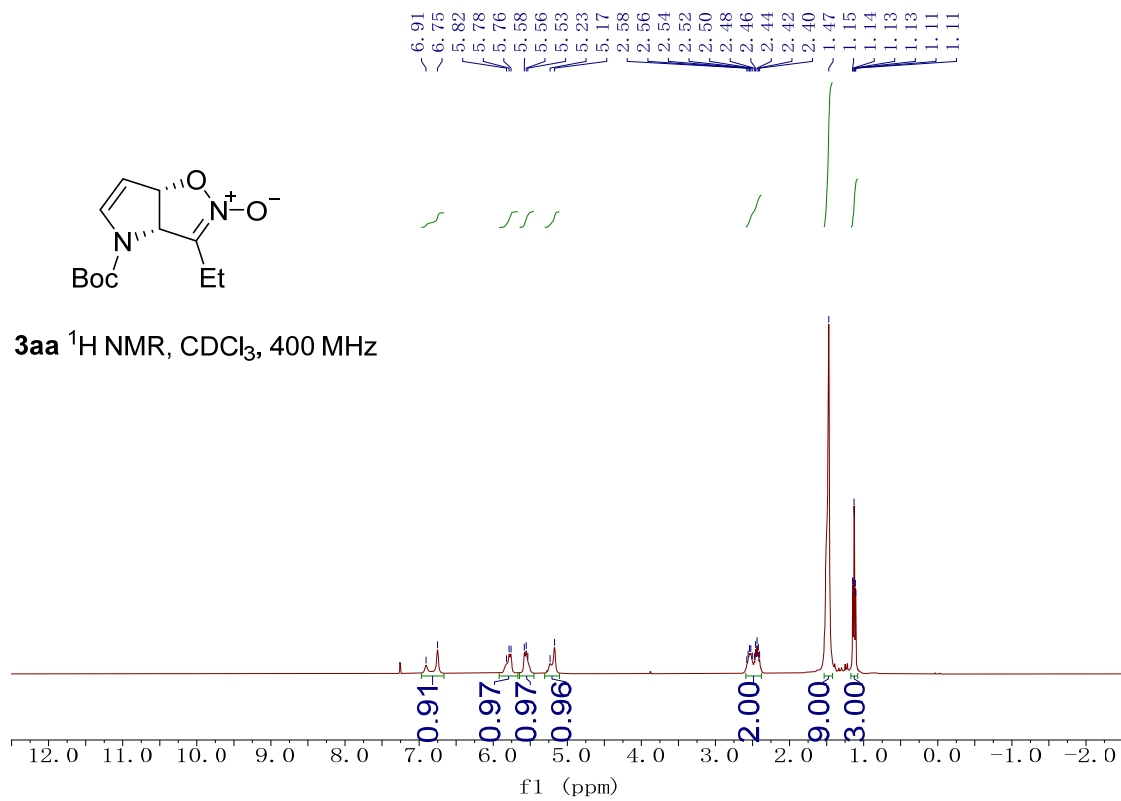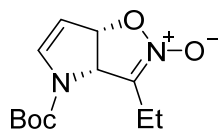

**3aa**  $^{13}\text{C}$  NMR,  $\text{CDCl}_3$ , 101 MHz

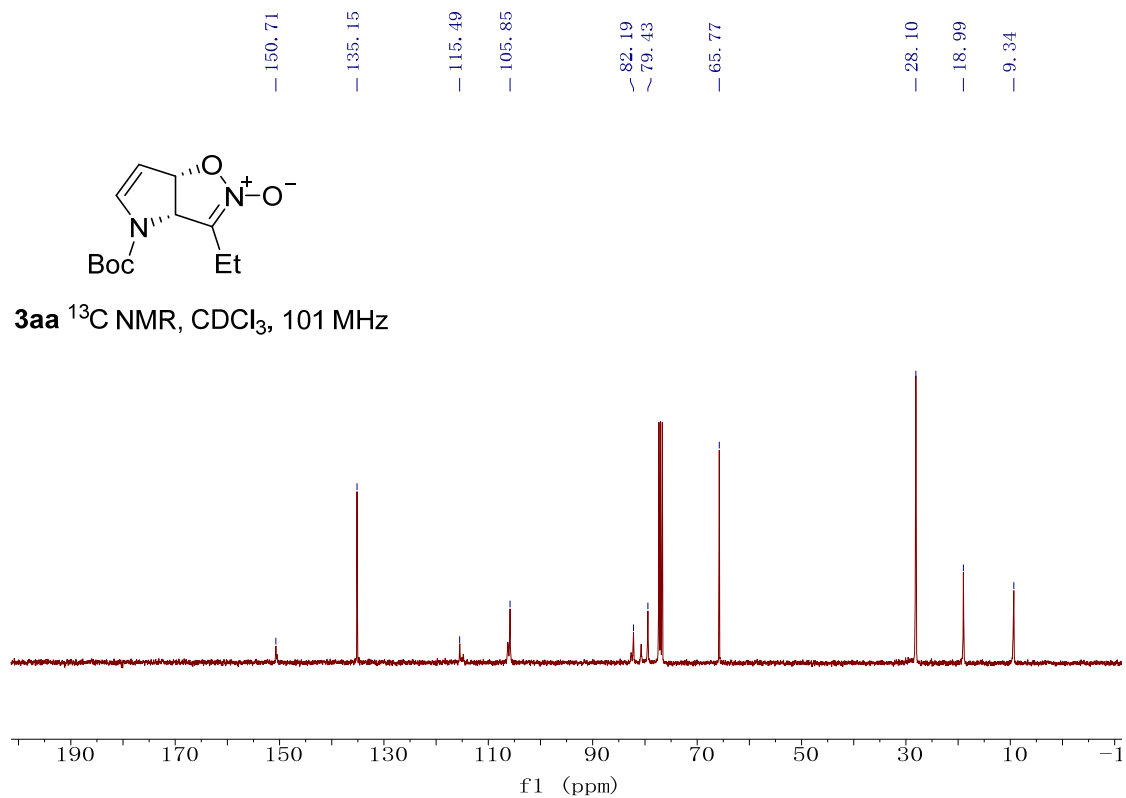

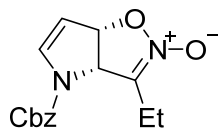

**3ba**  $^1\text{H}$  NMR,  $\text{CDCl}_3$ , 400 MHz

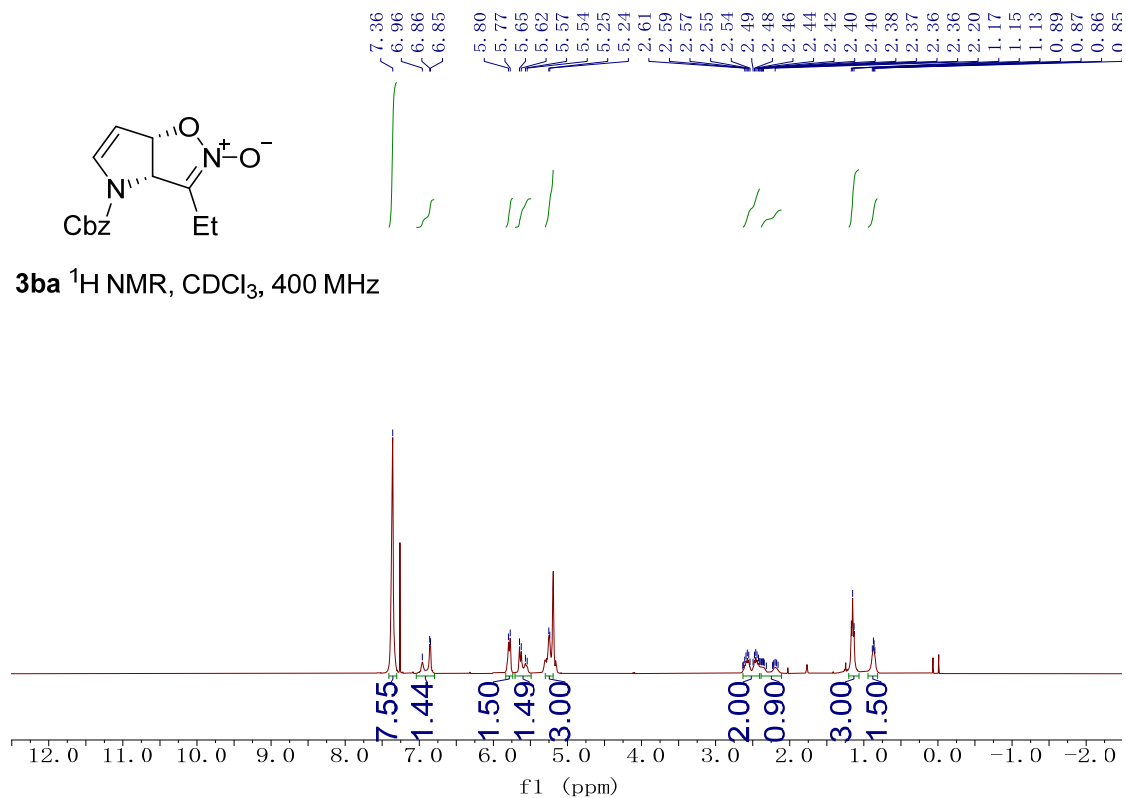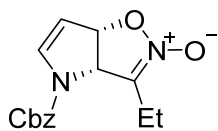

**3ba**  $^{13}\text{C}$  NMR,  $\text{CDCl}_3$ , 101 MHz

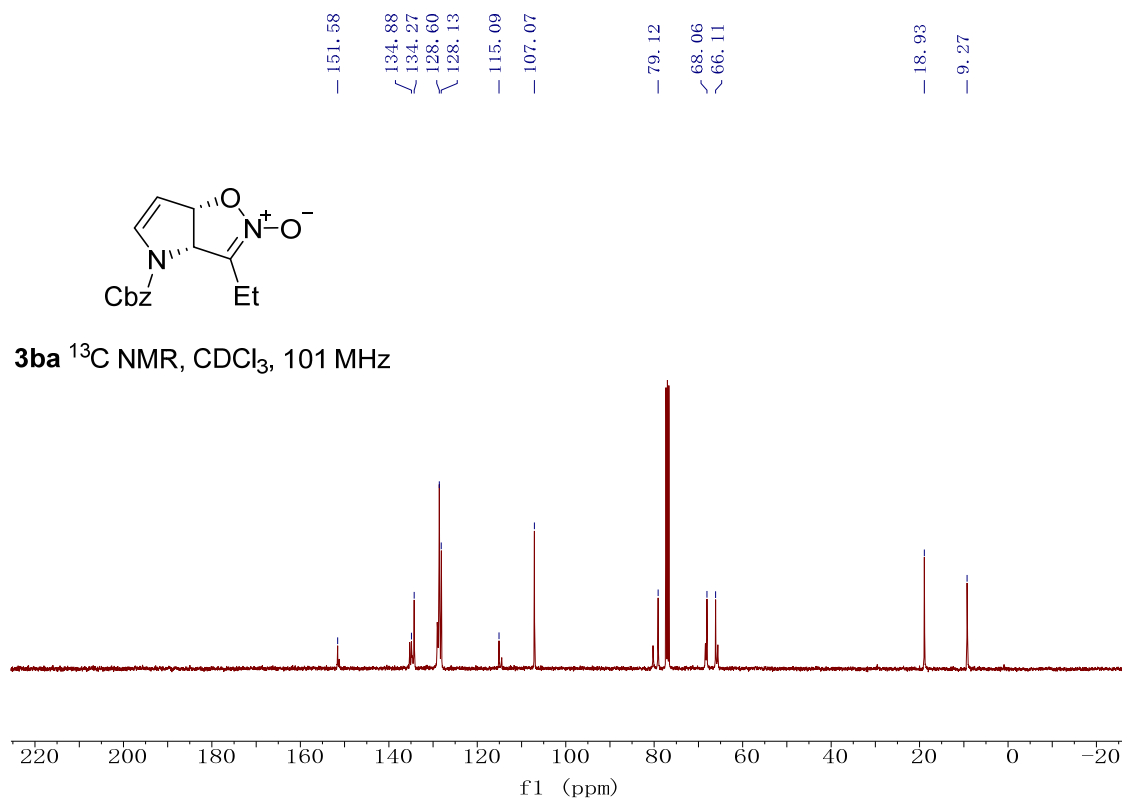

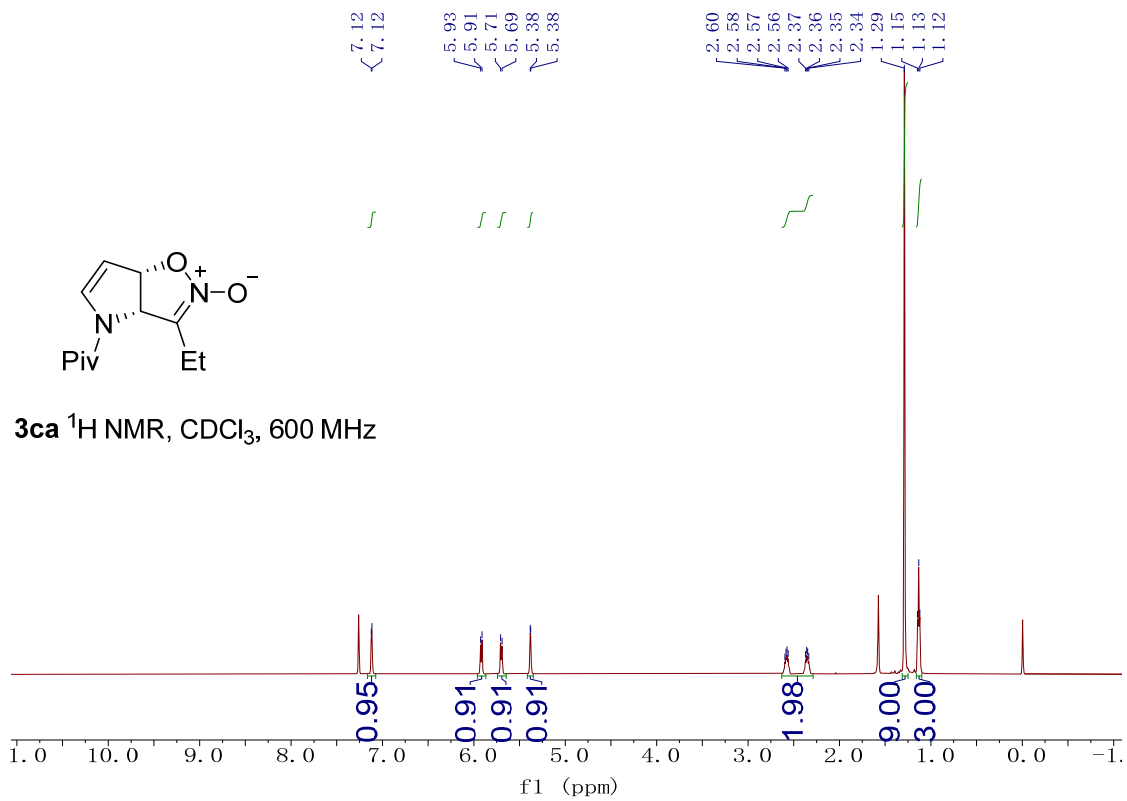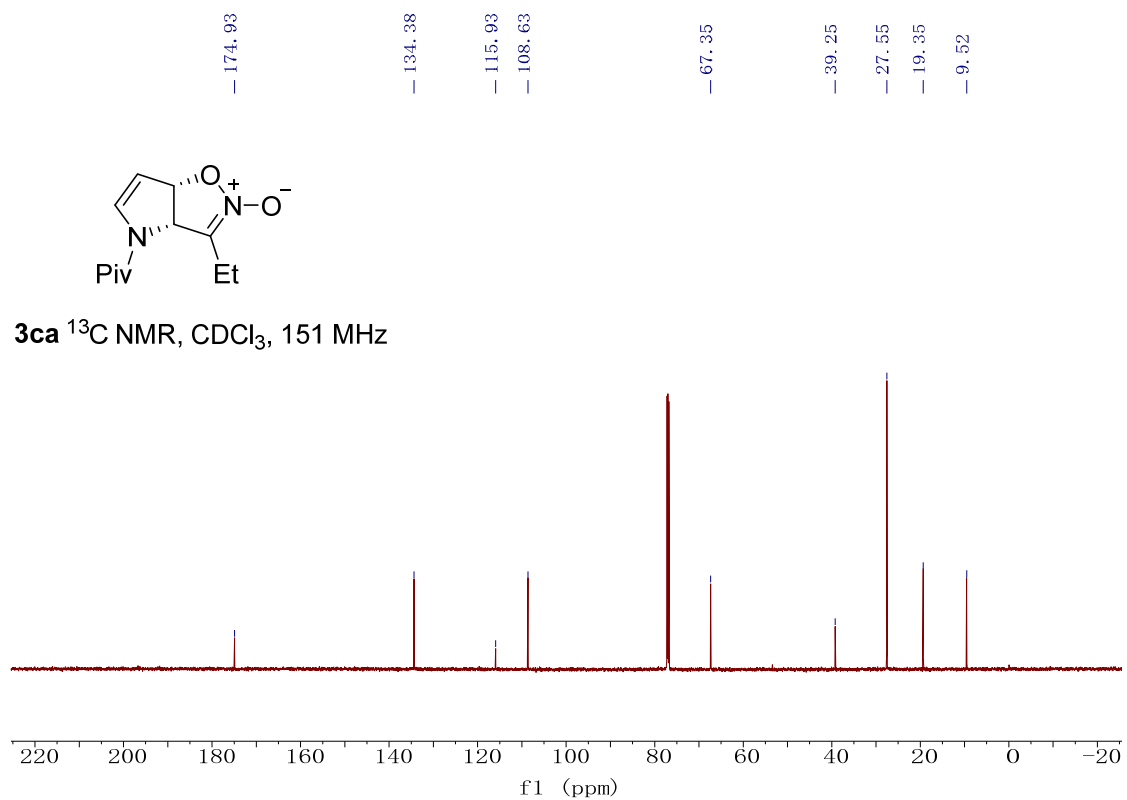

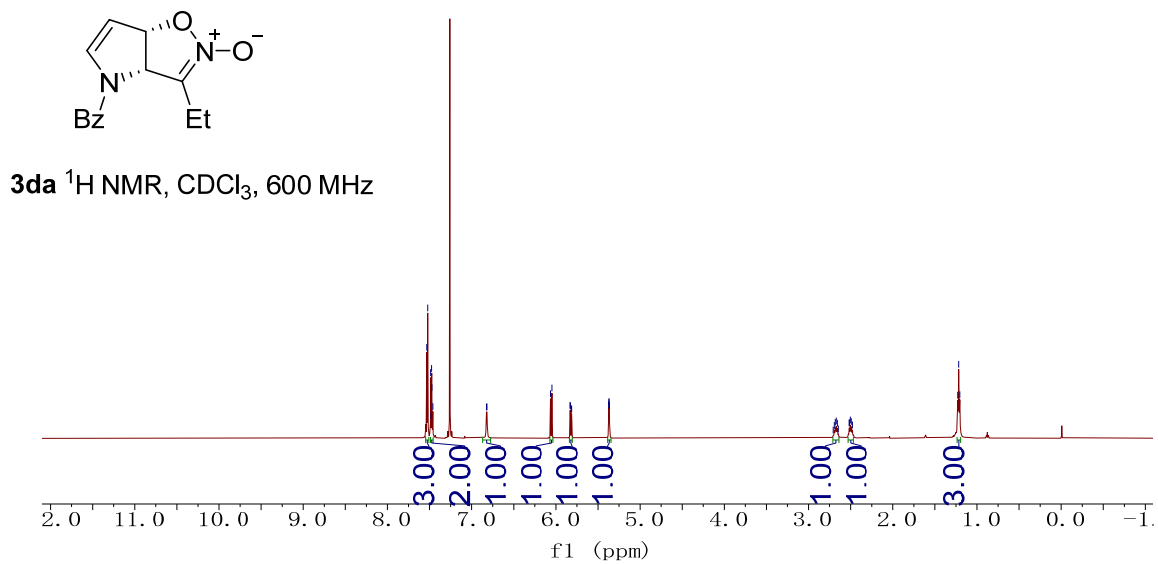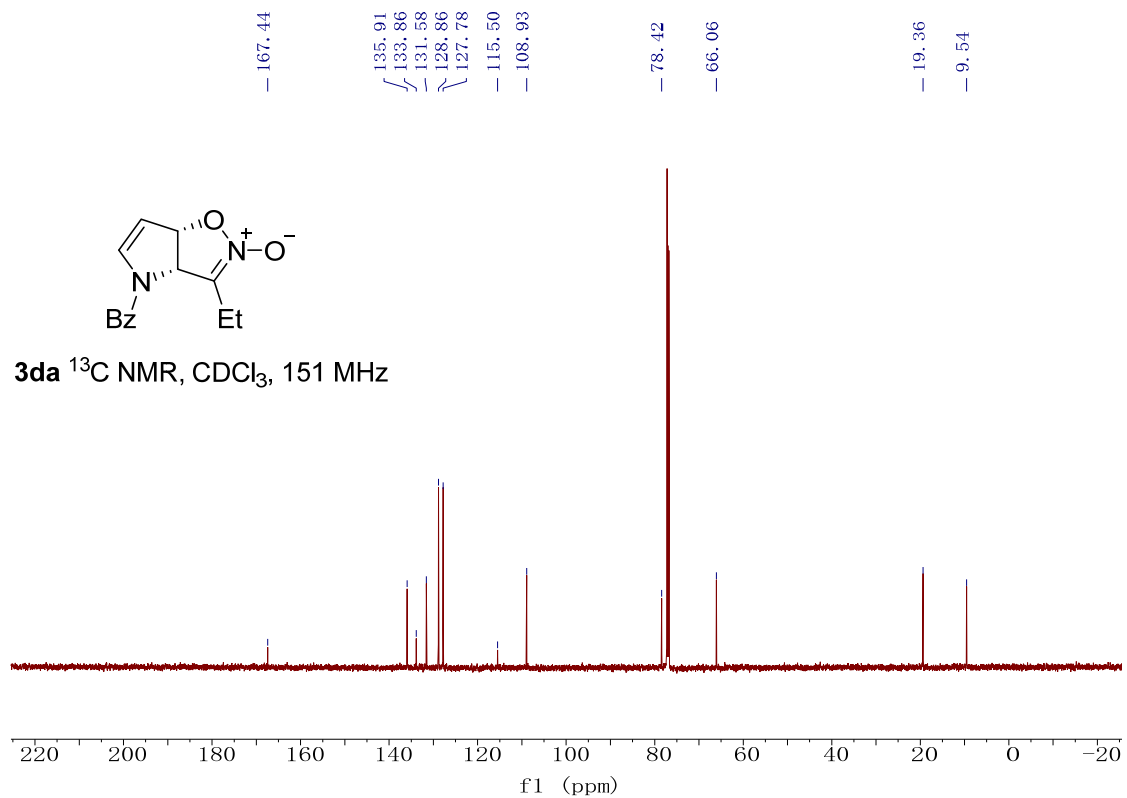

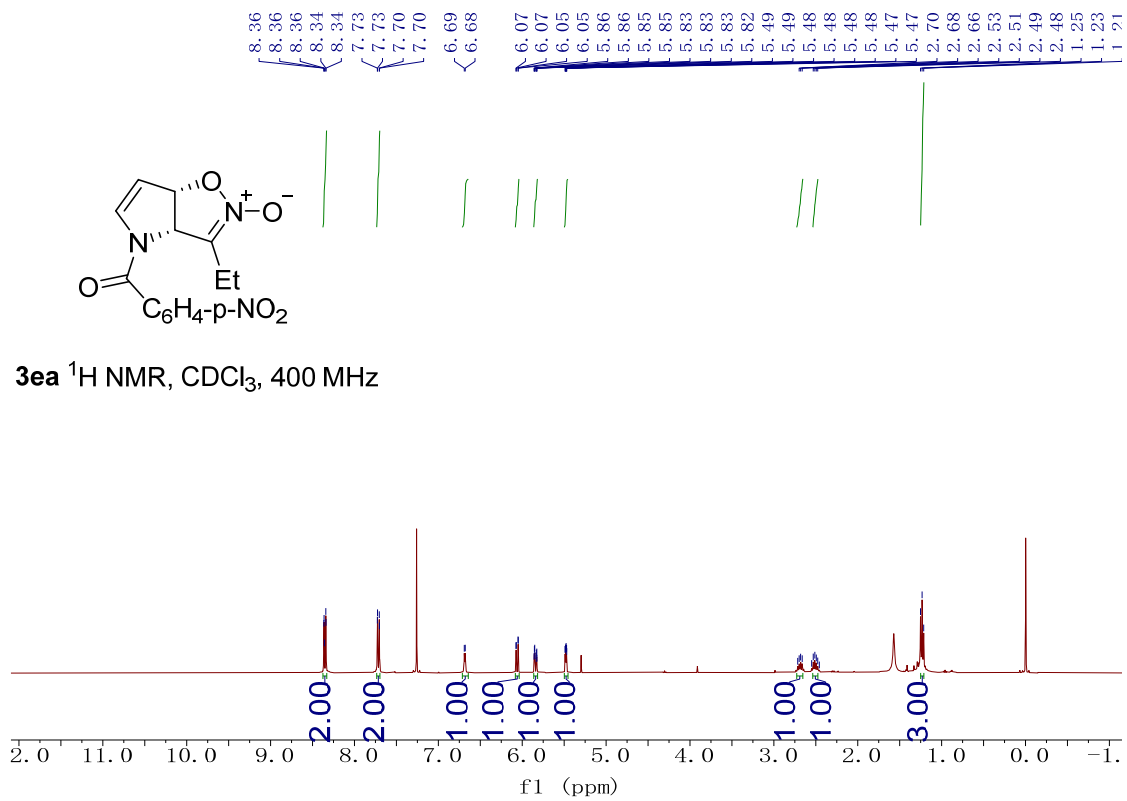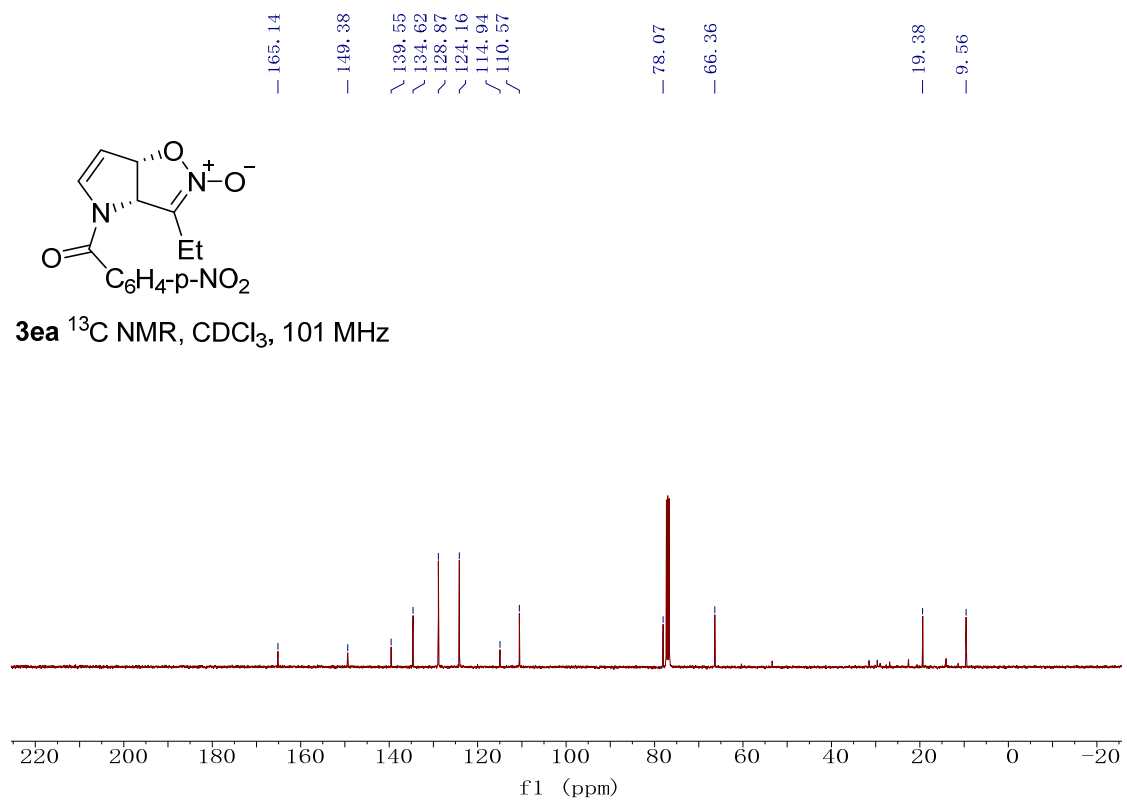

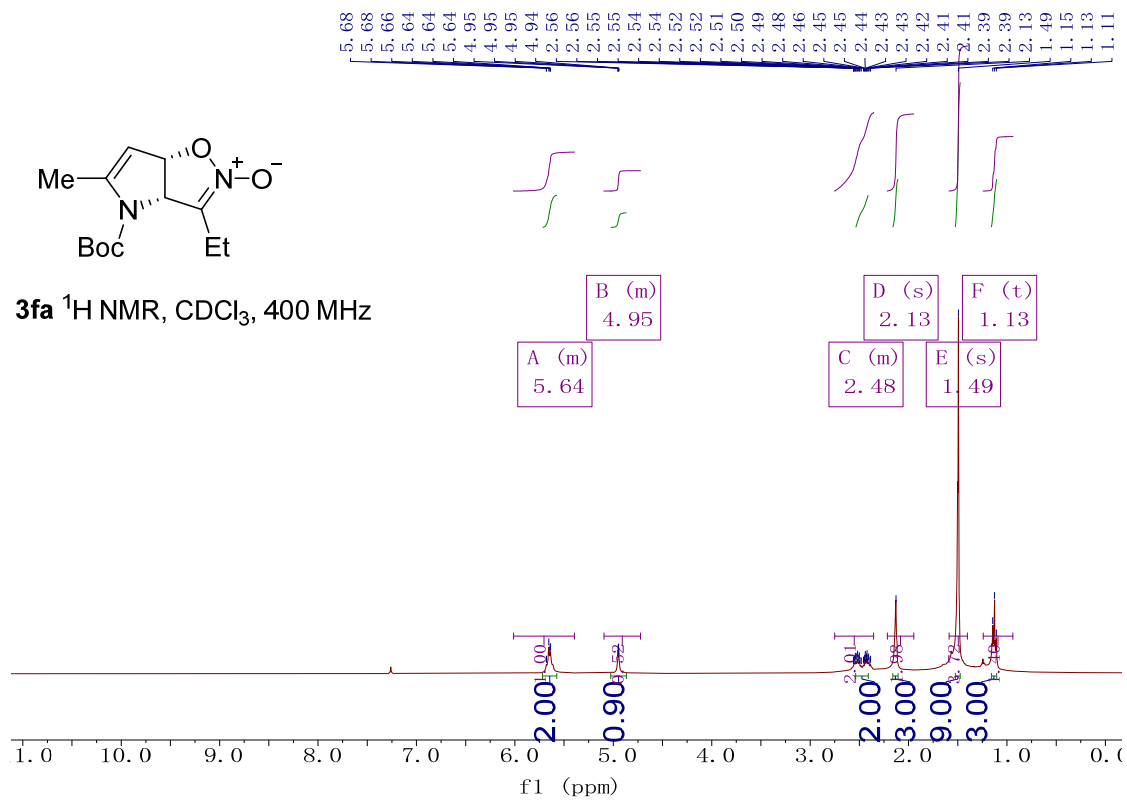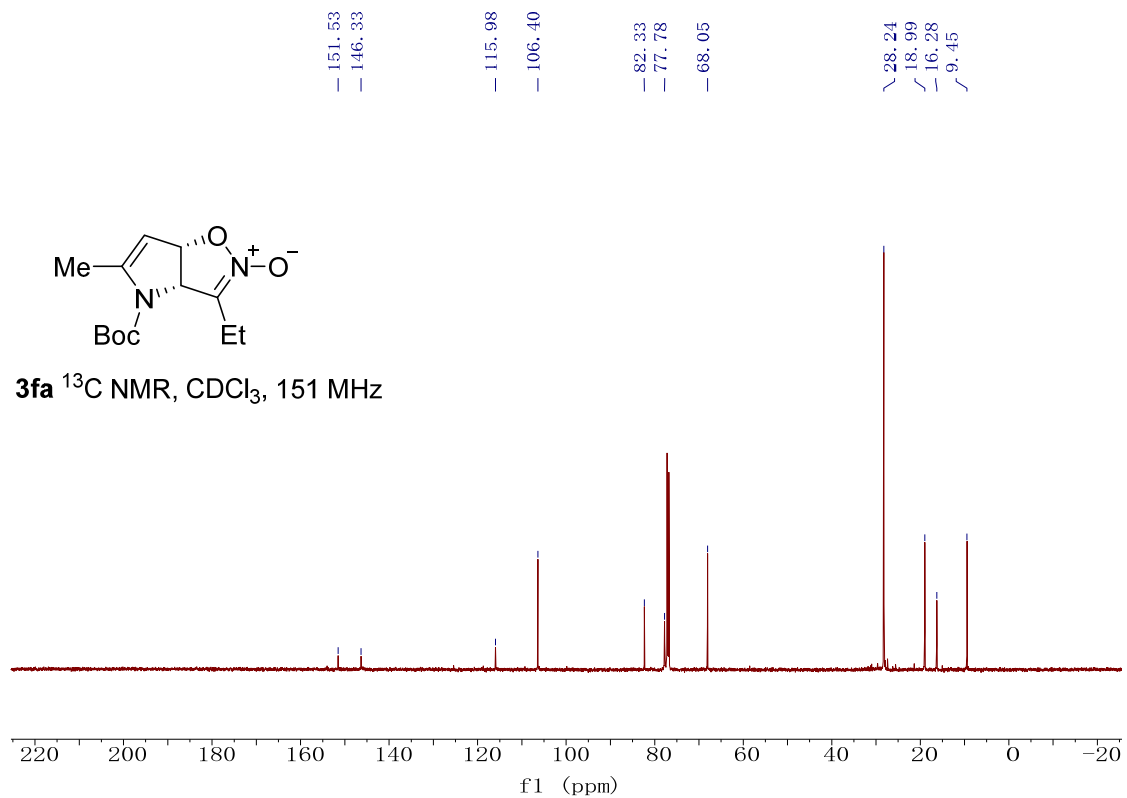

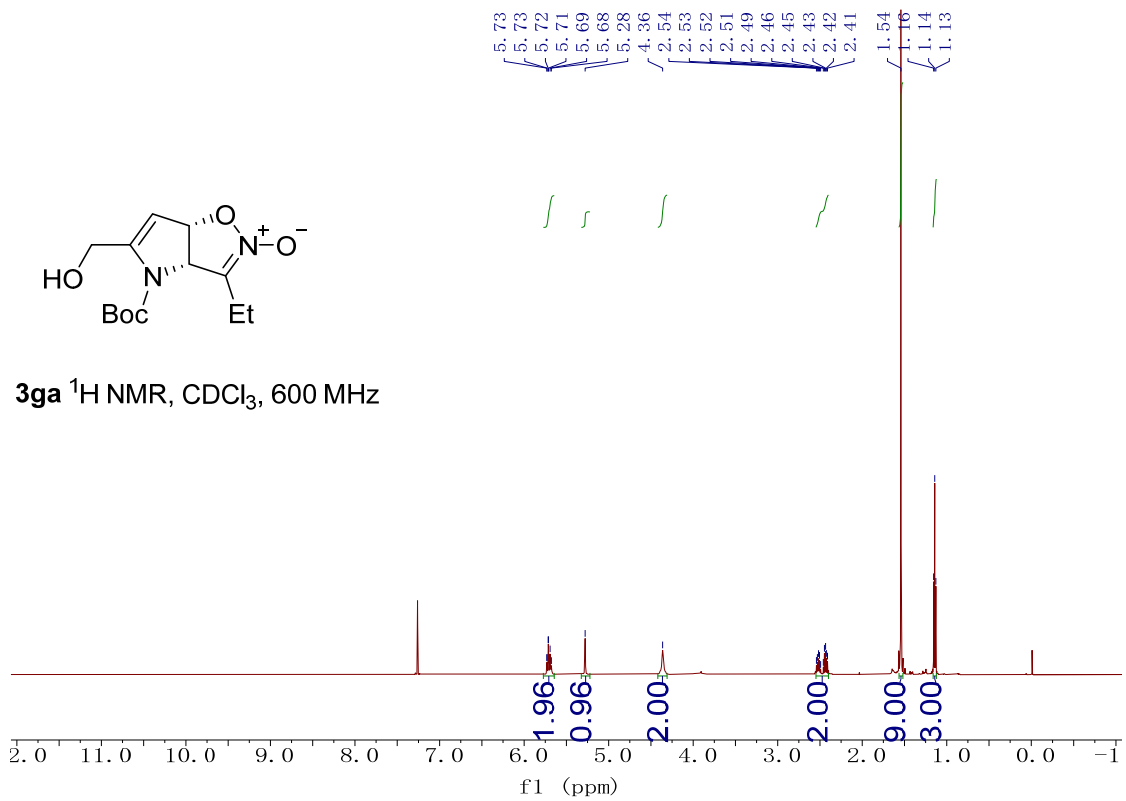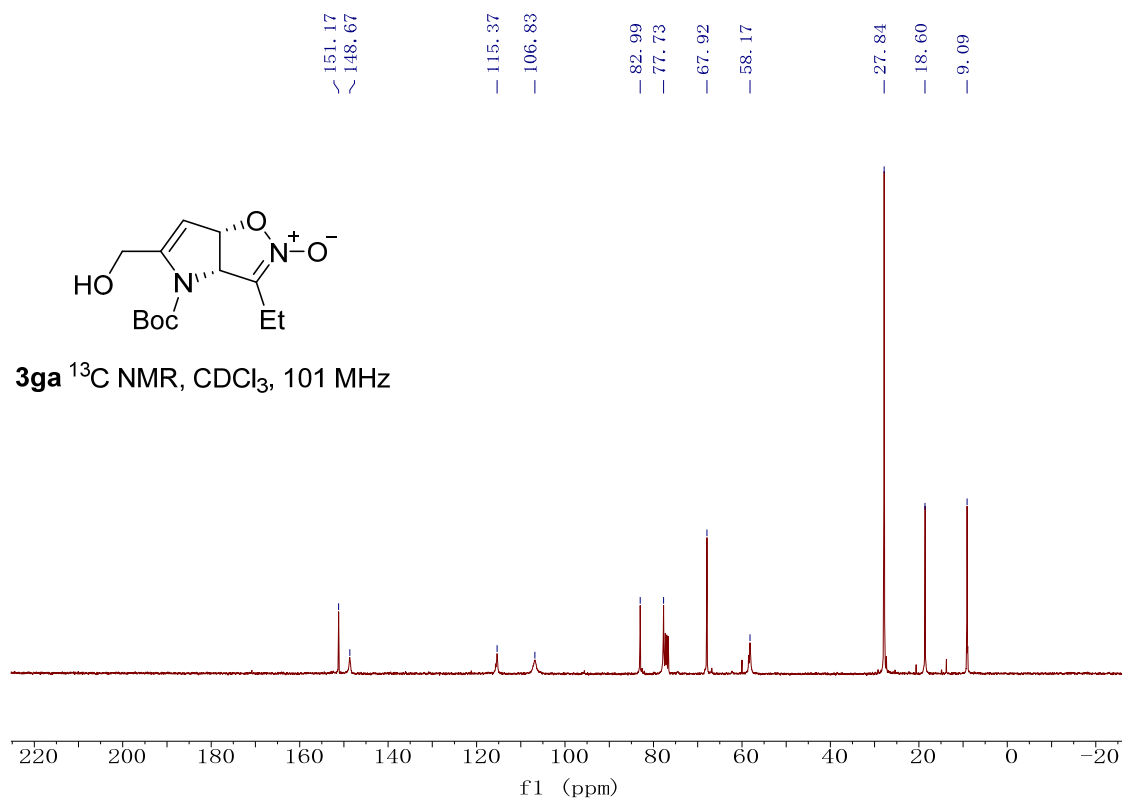



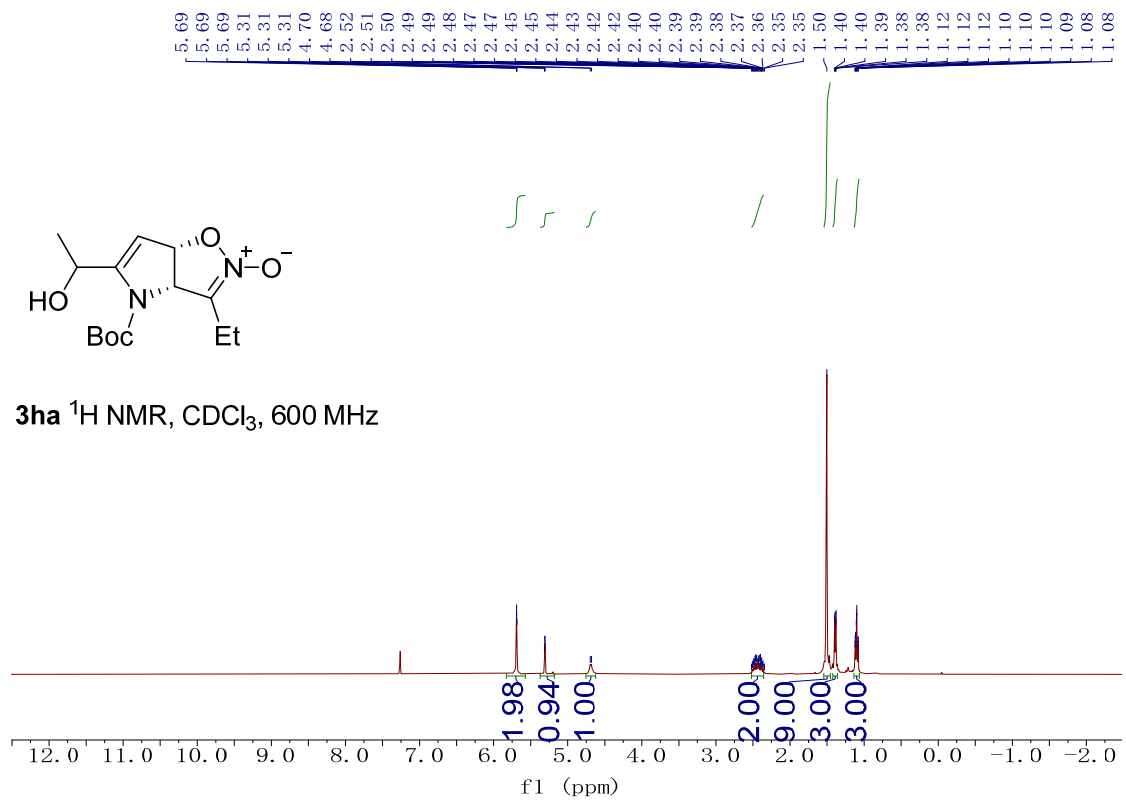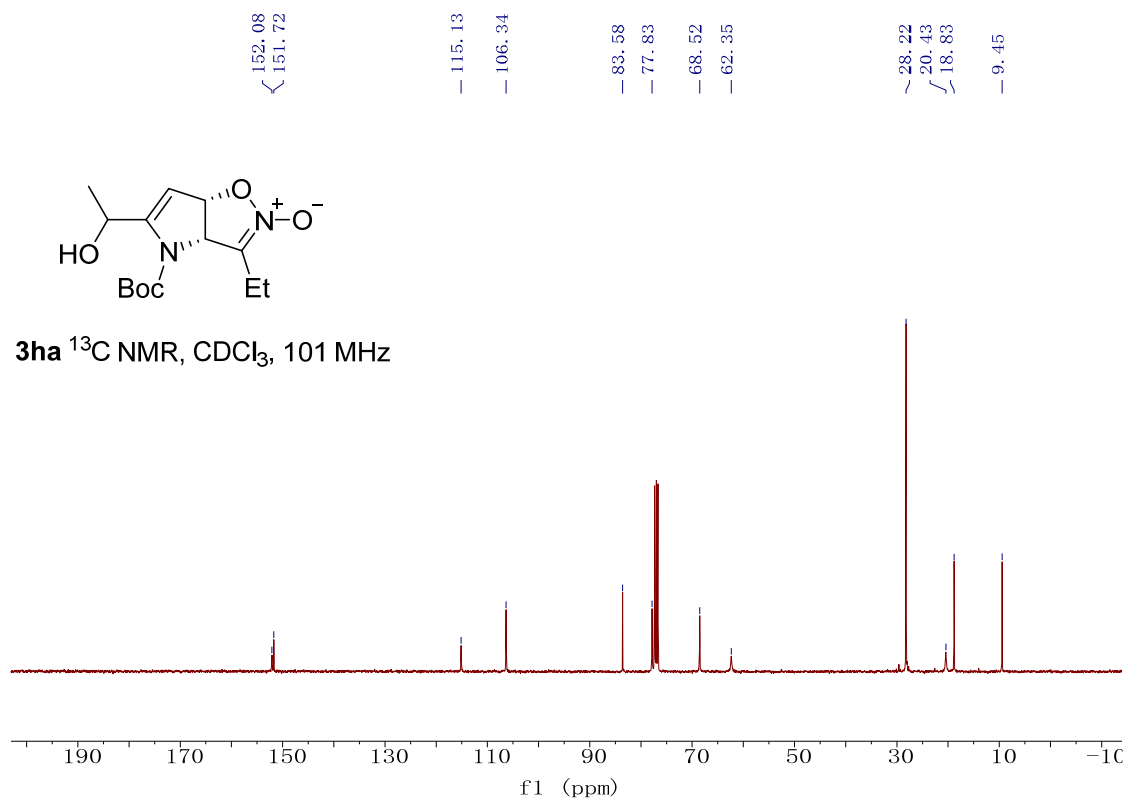

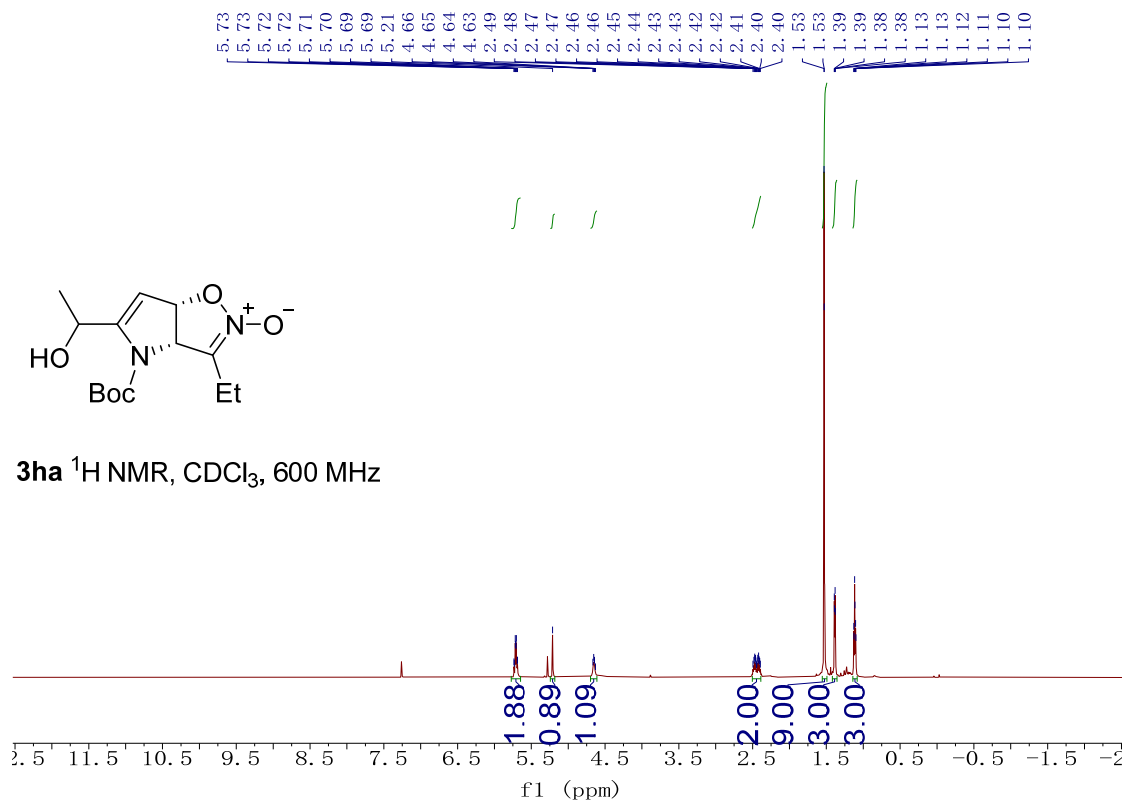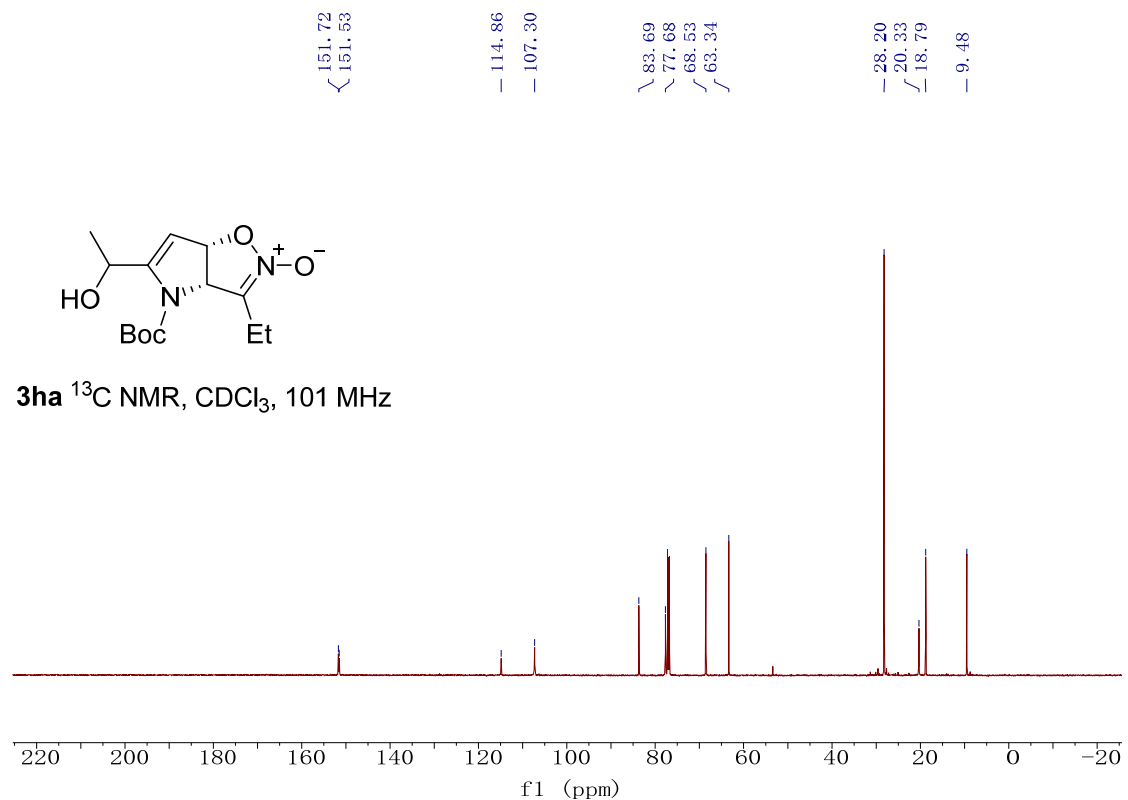

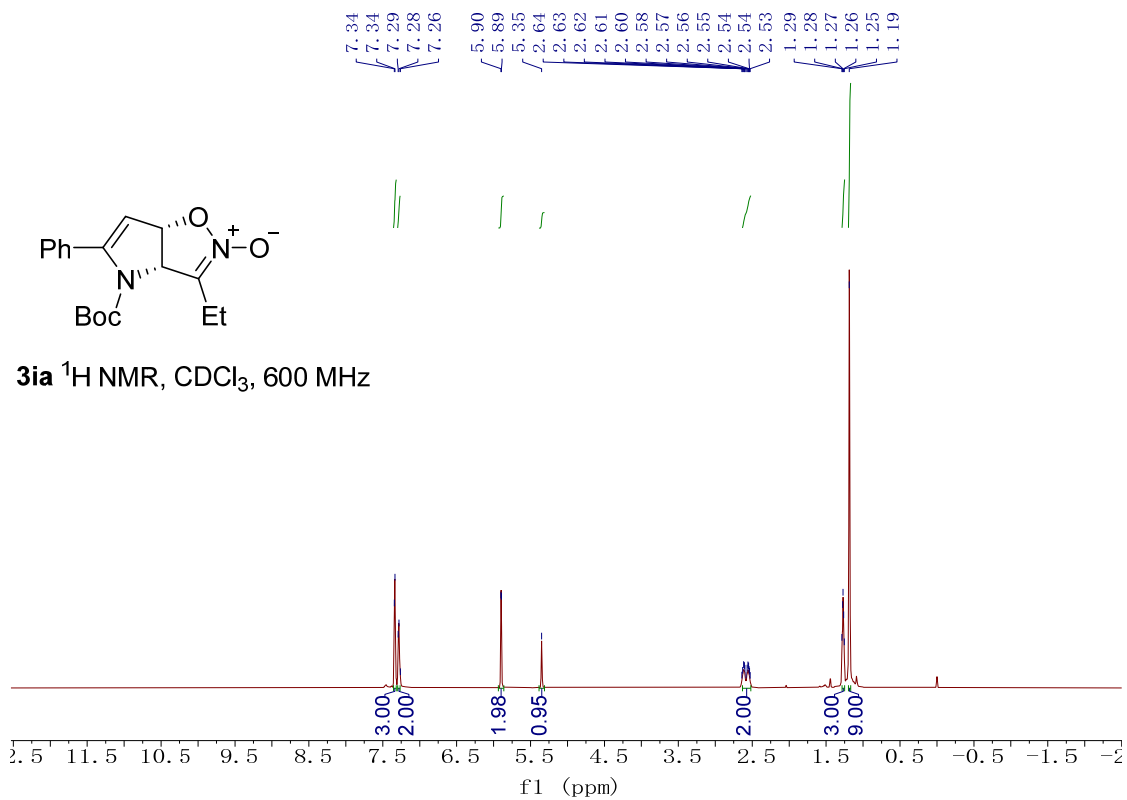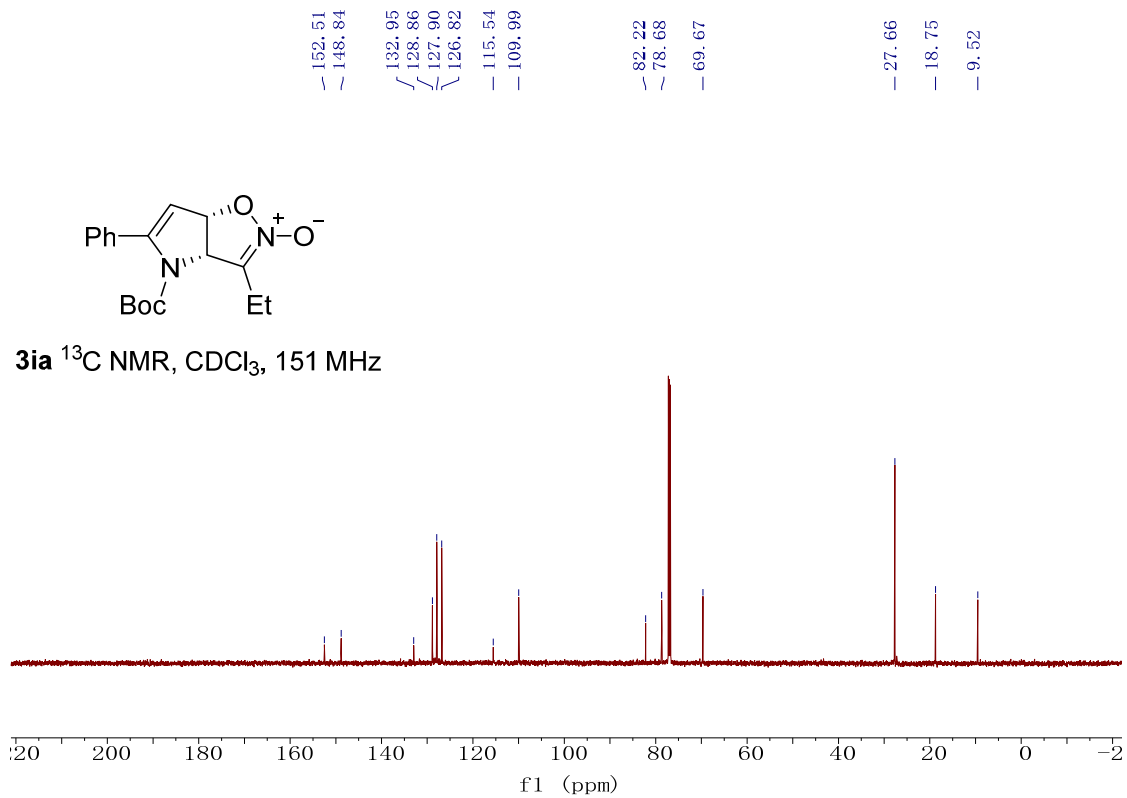

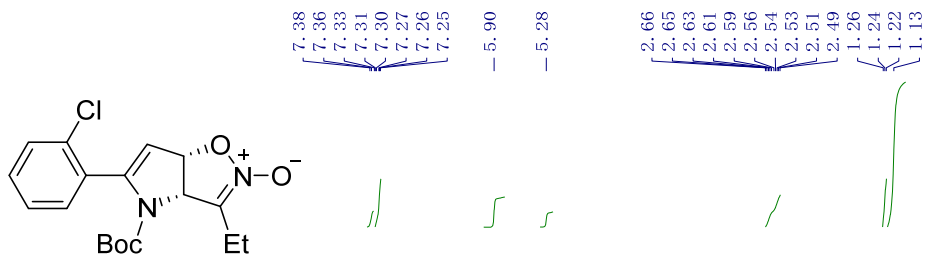

**3ja**  $^1\text{H}$  NMR,  $\text{CDCl}_3$ , 400 MHz

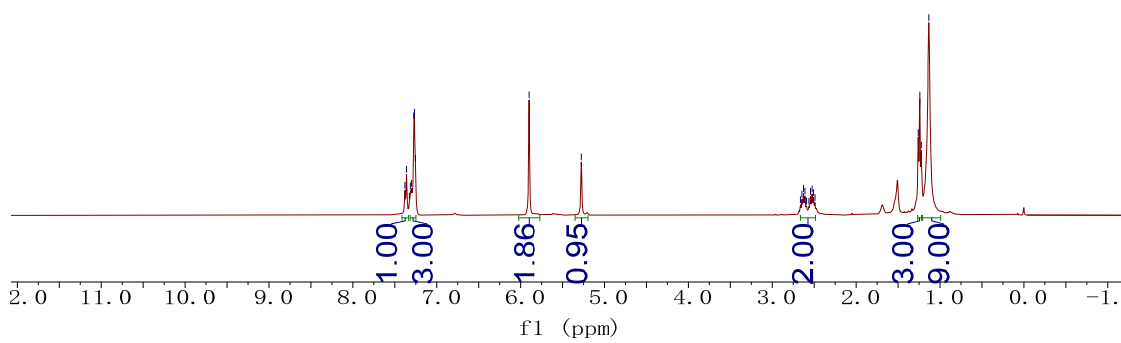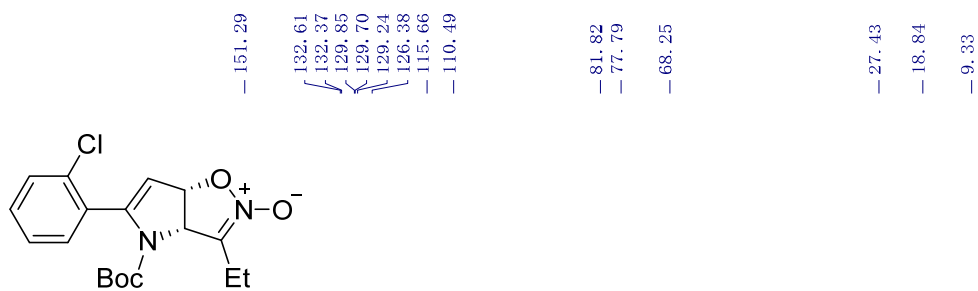

**3ja**  $^{13}\text{C}$  NMR,  $\text{CDCl}_3$ , 101 MHz

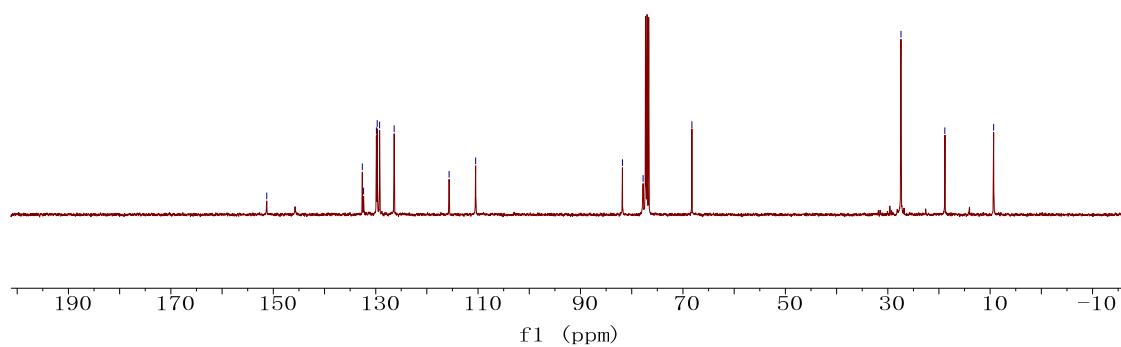

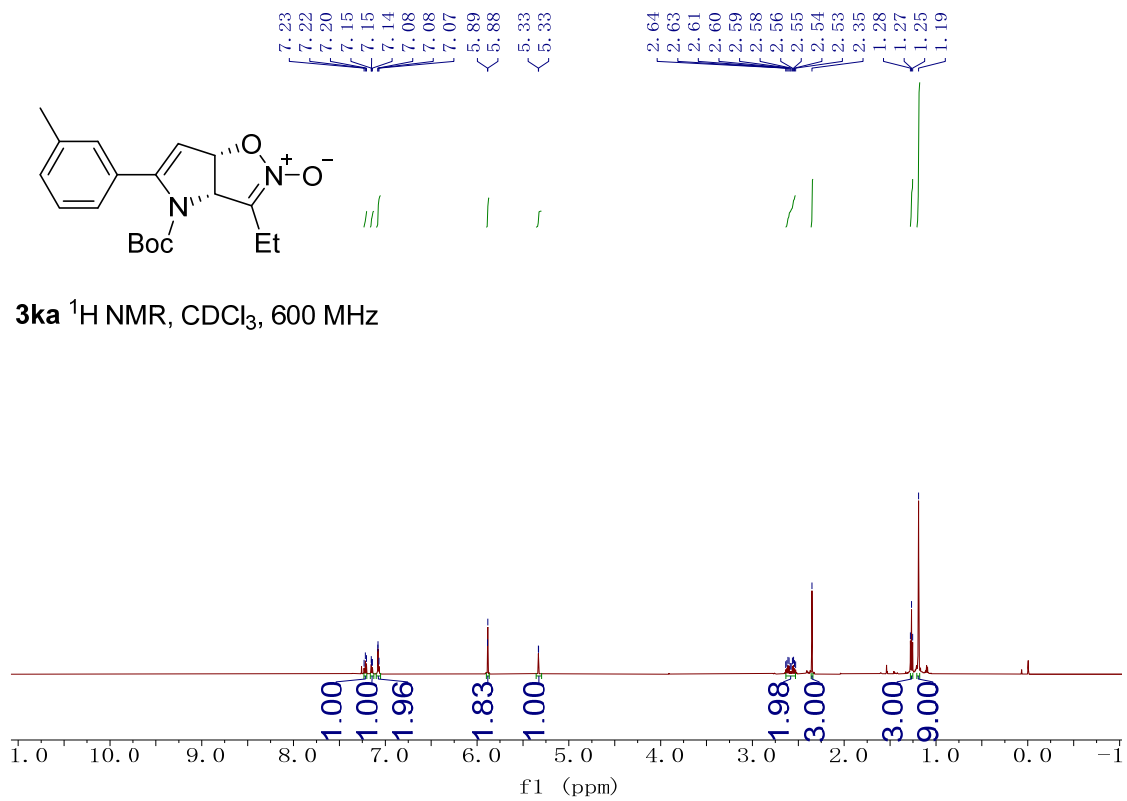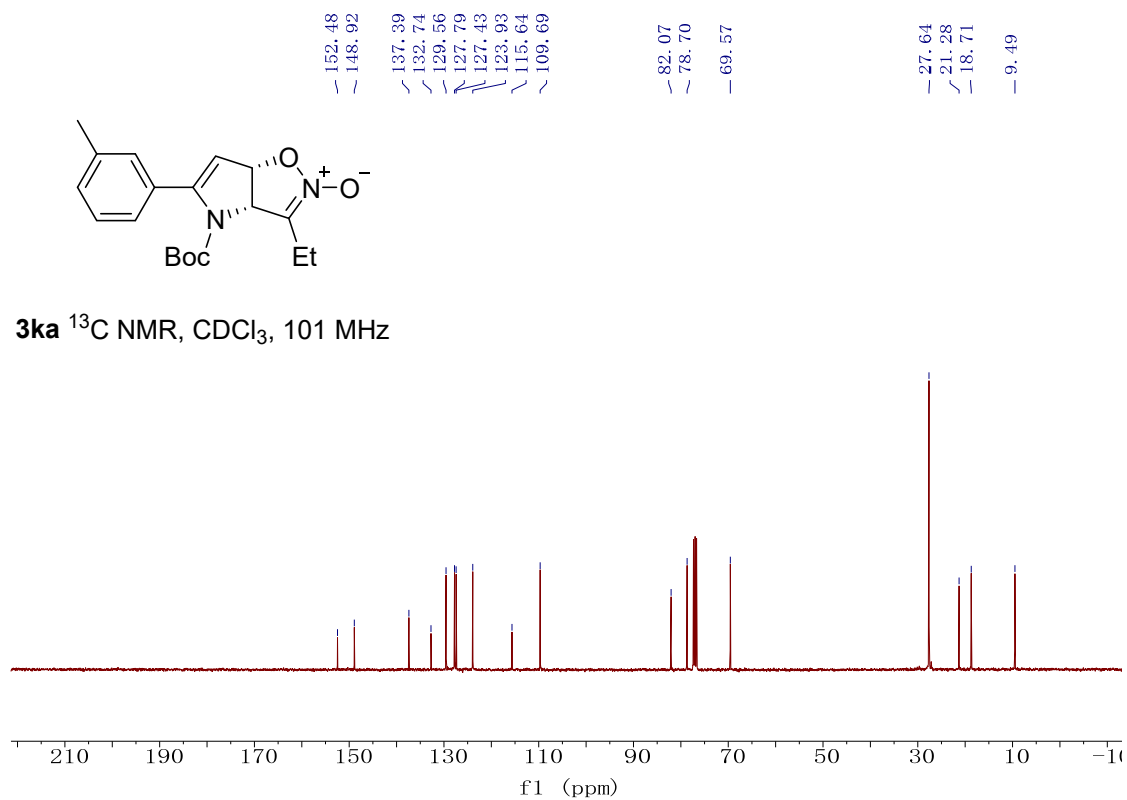

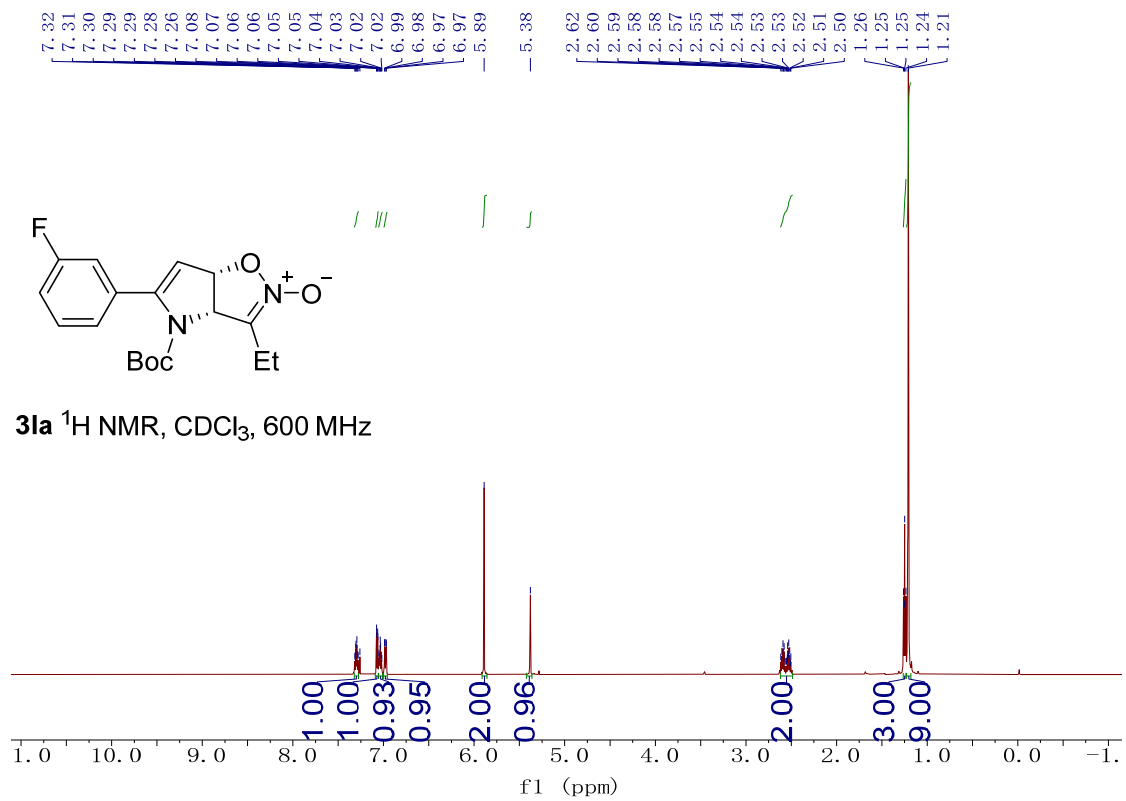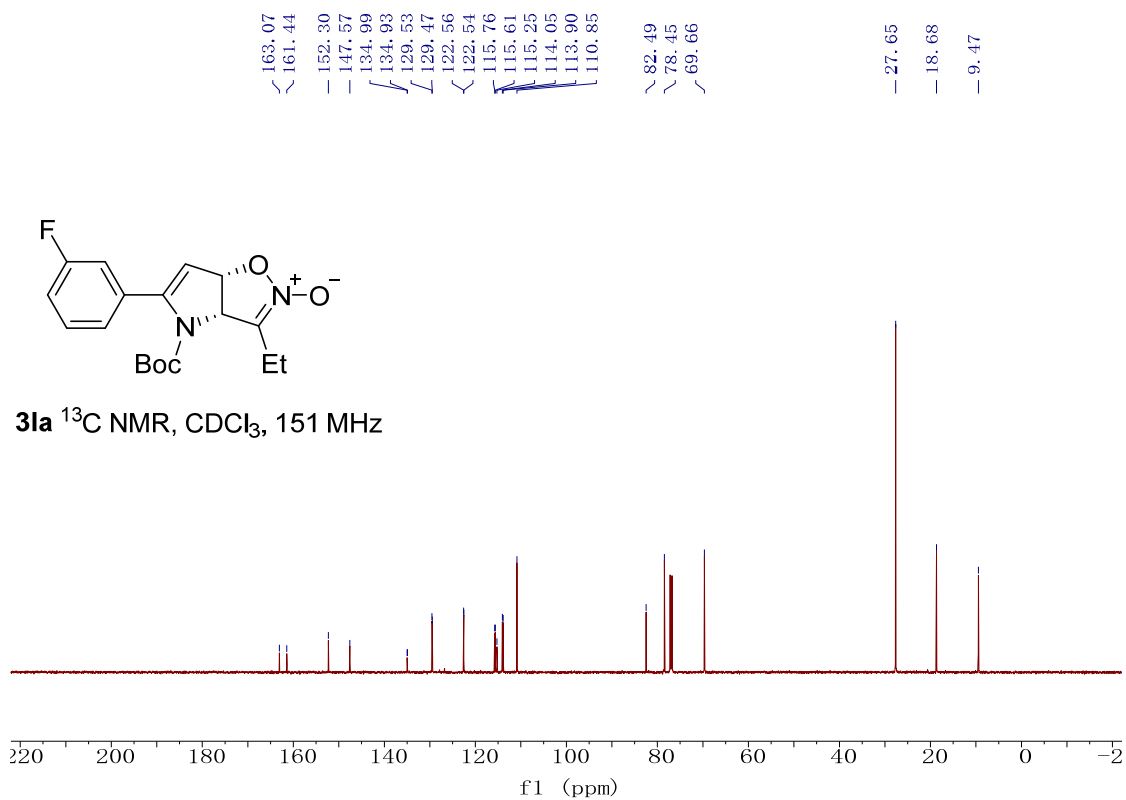

-113.31

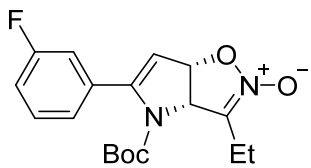

**3la** <sup>19</sup>F NMR, CDCl<sub>3</sub>, 565 MHz

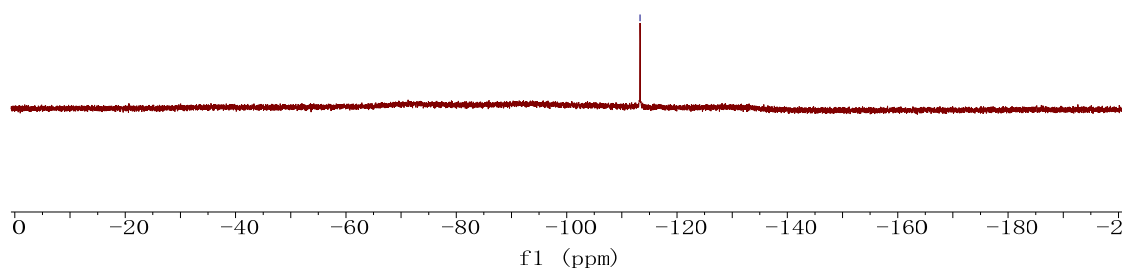

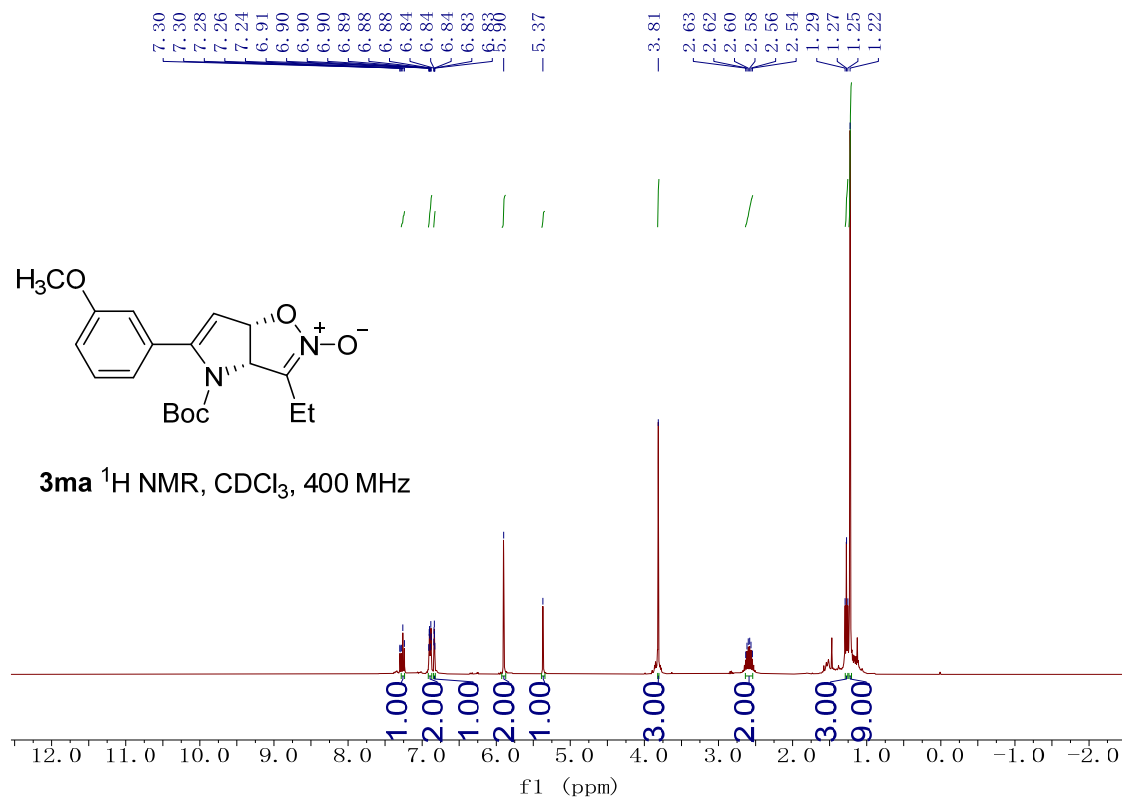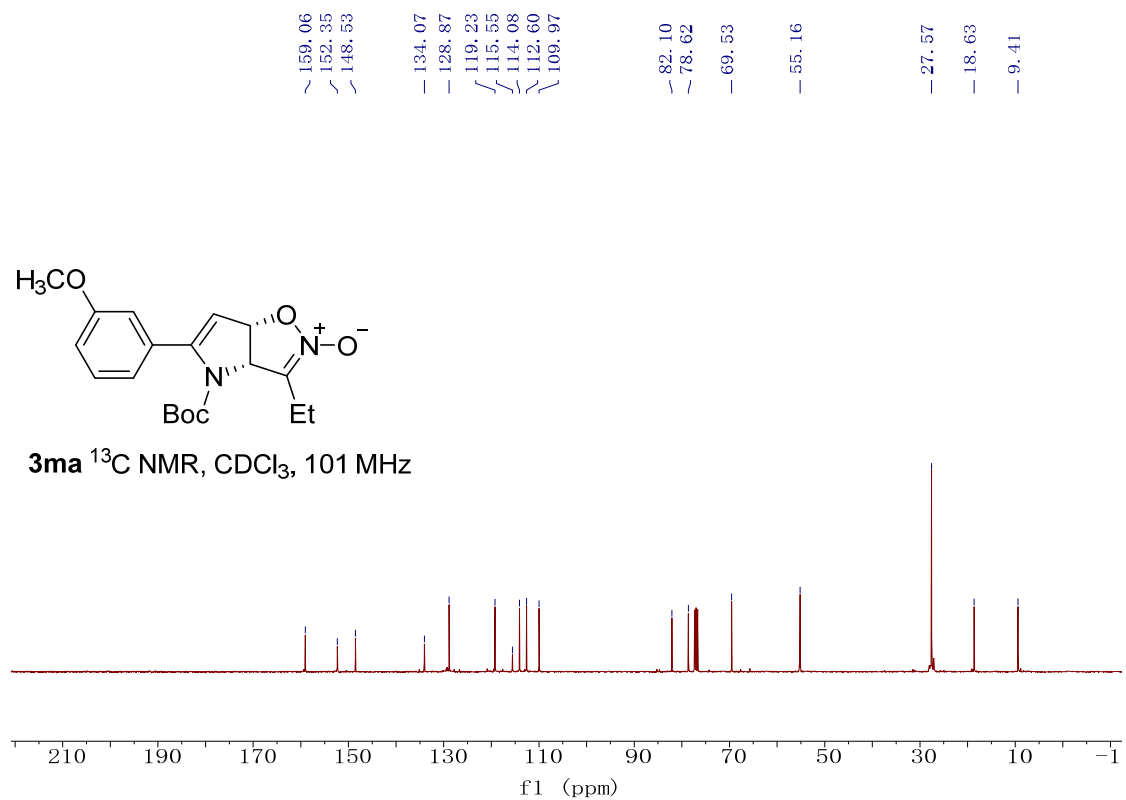



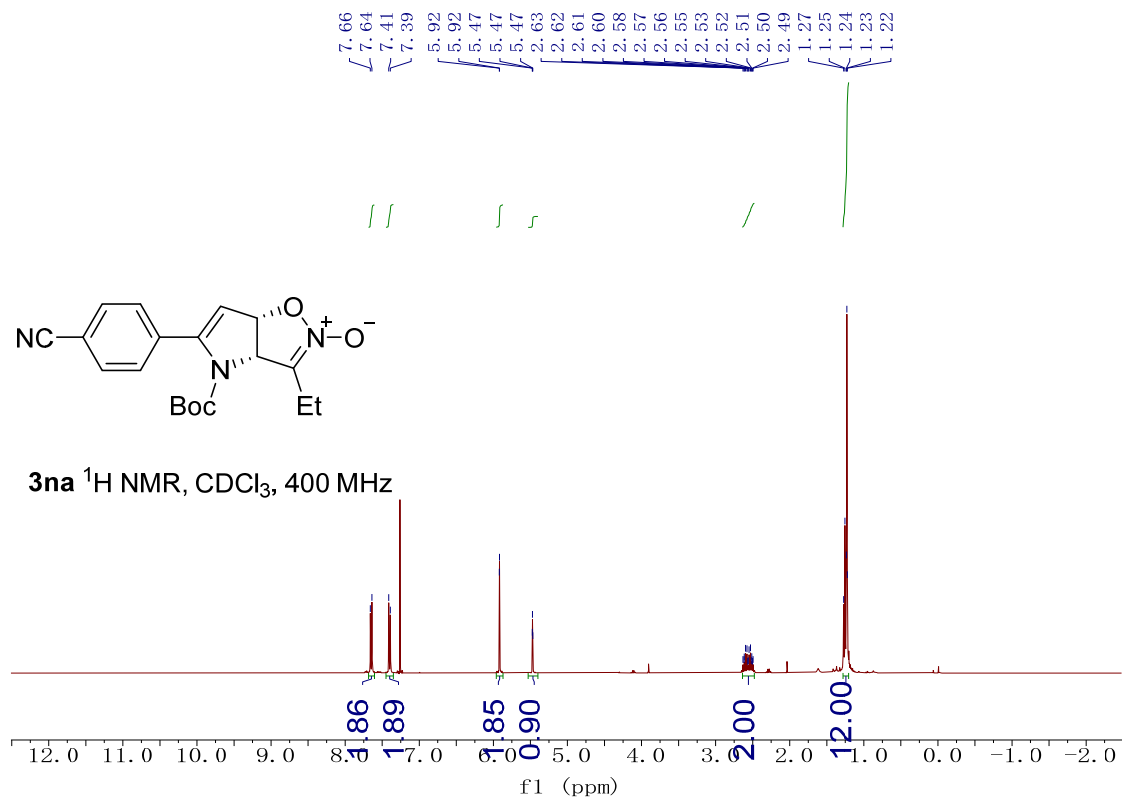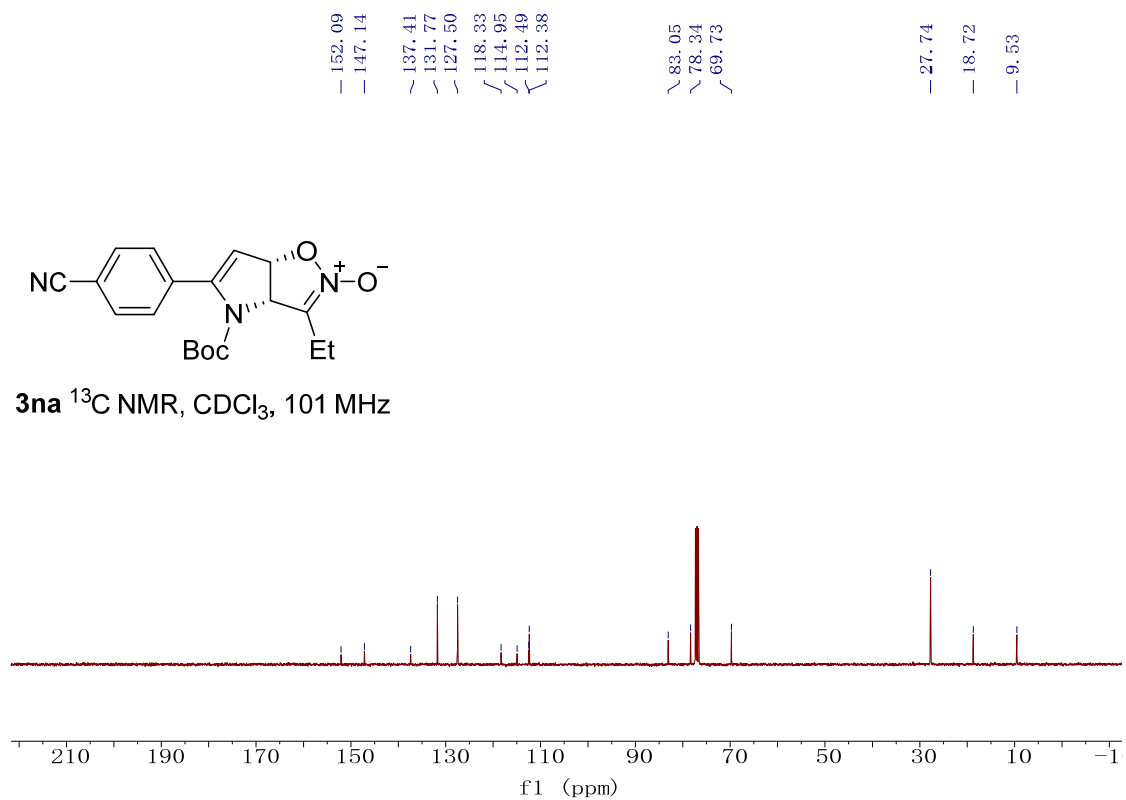

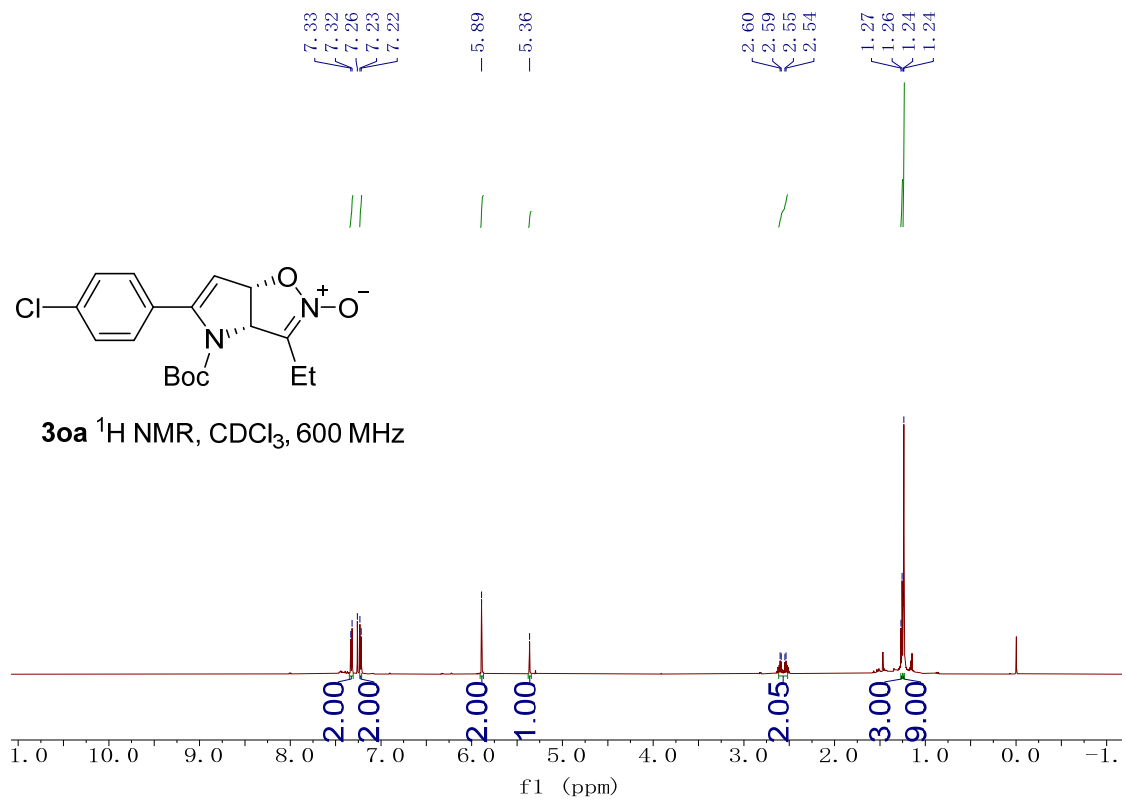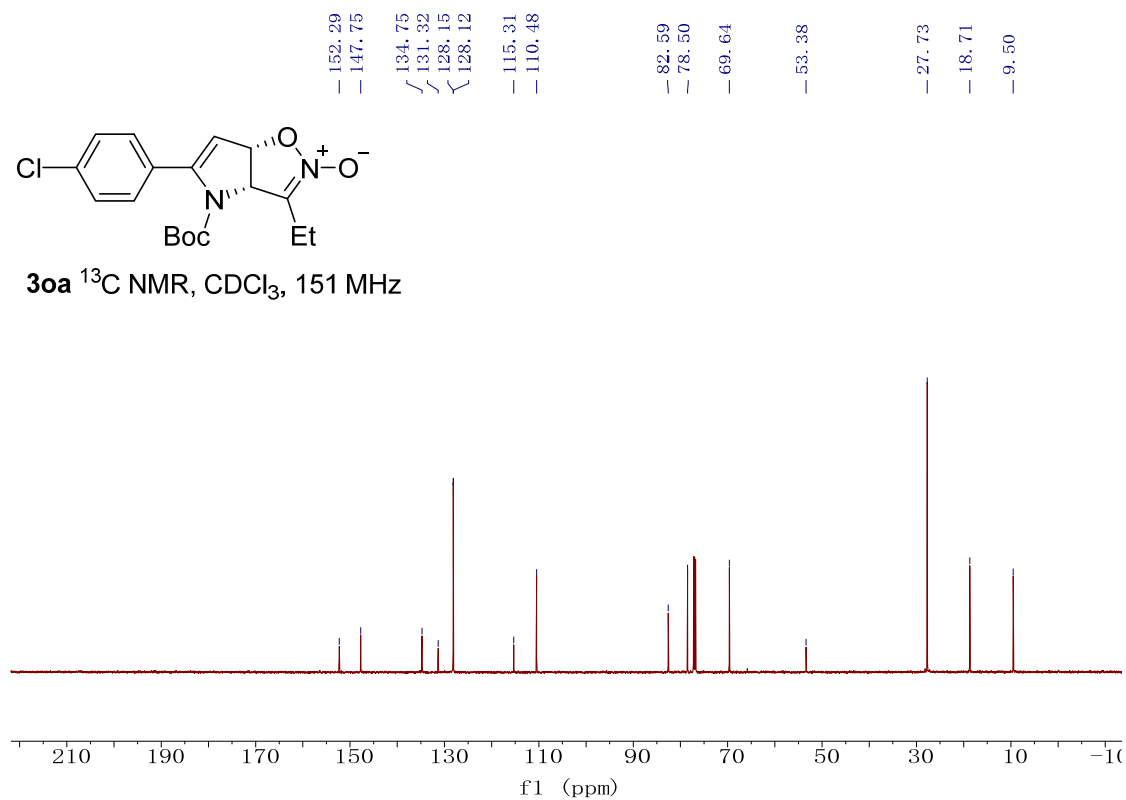

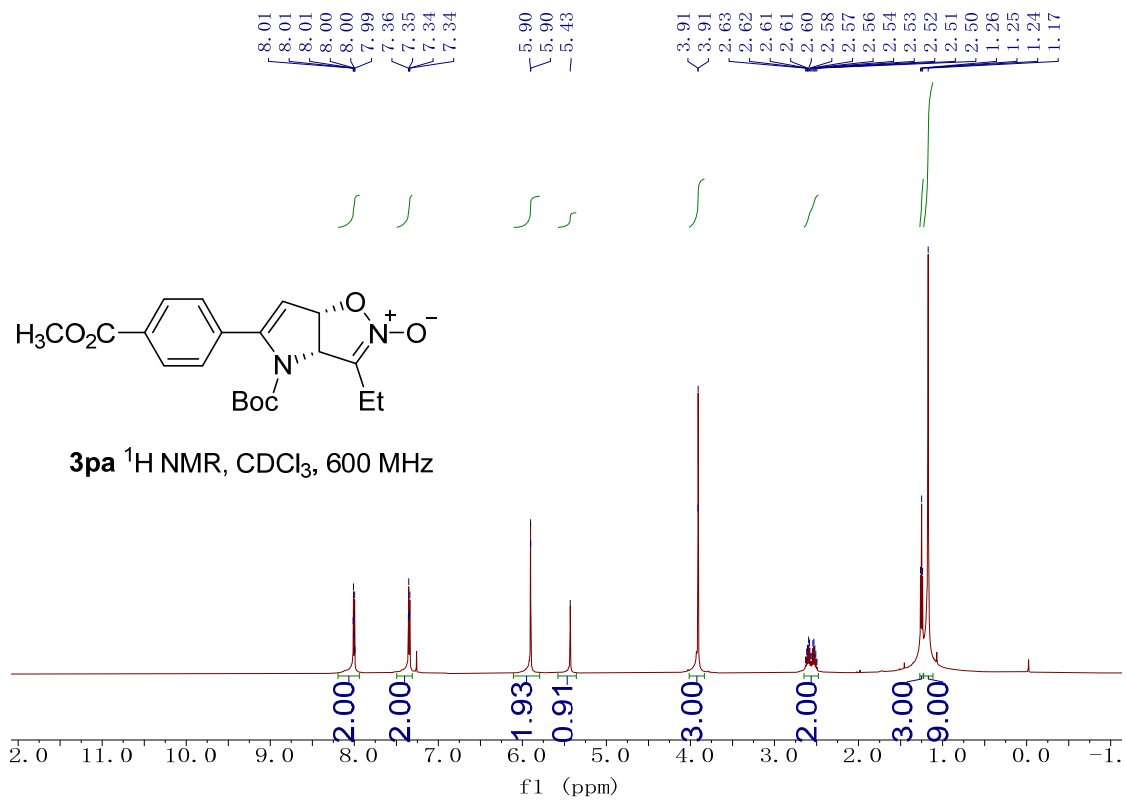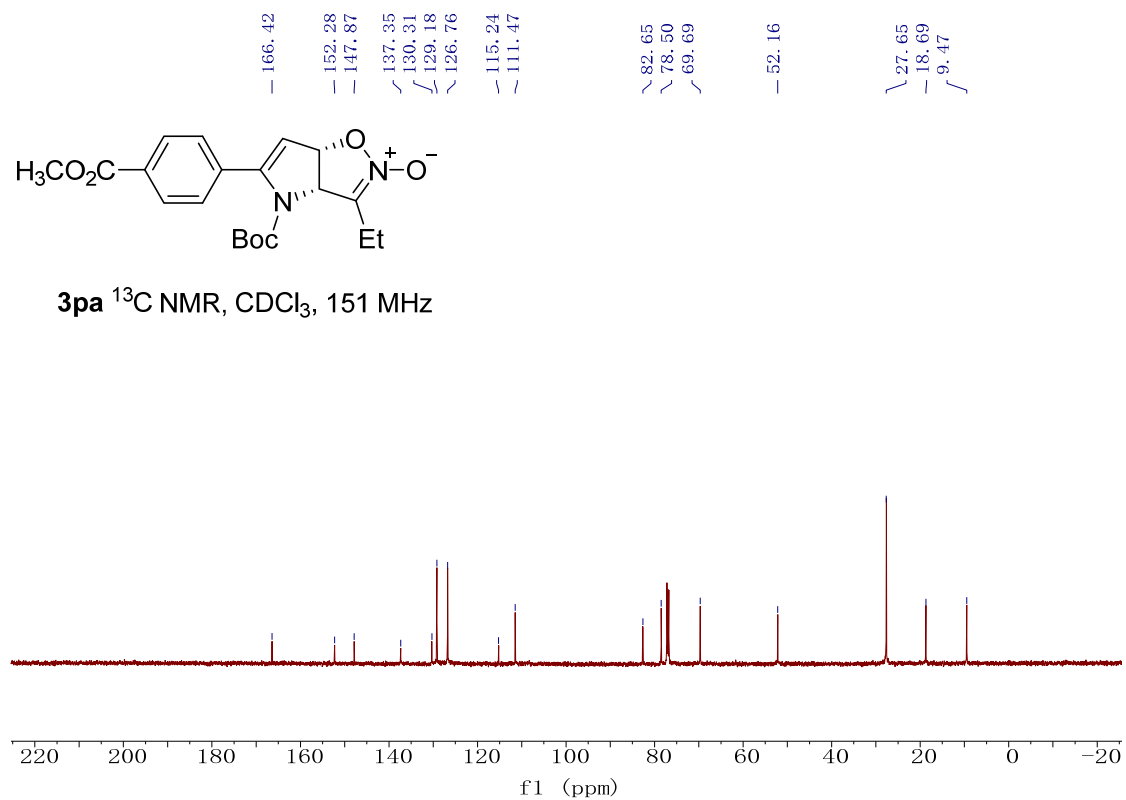

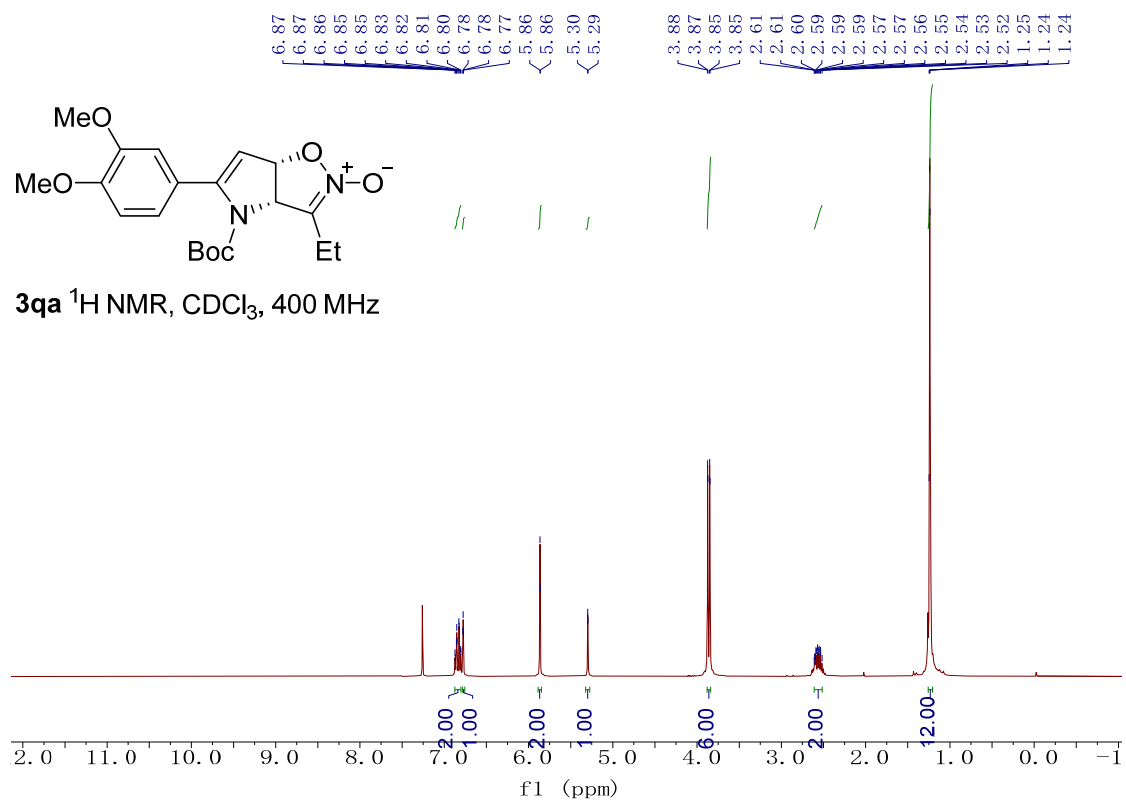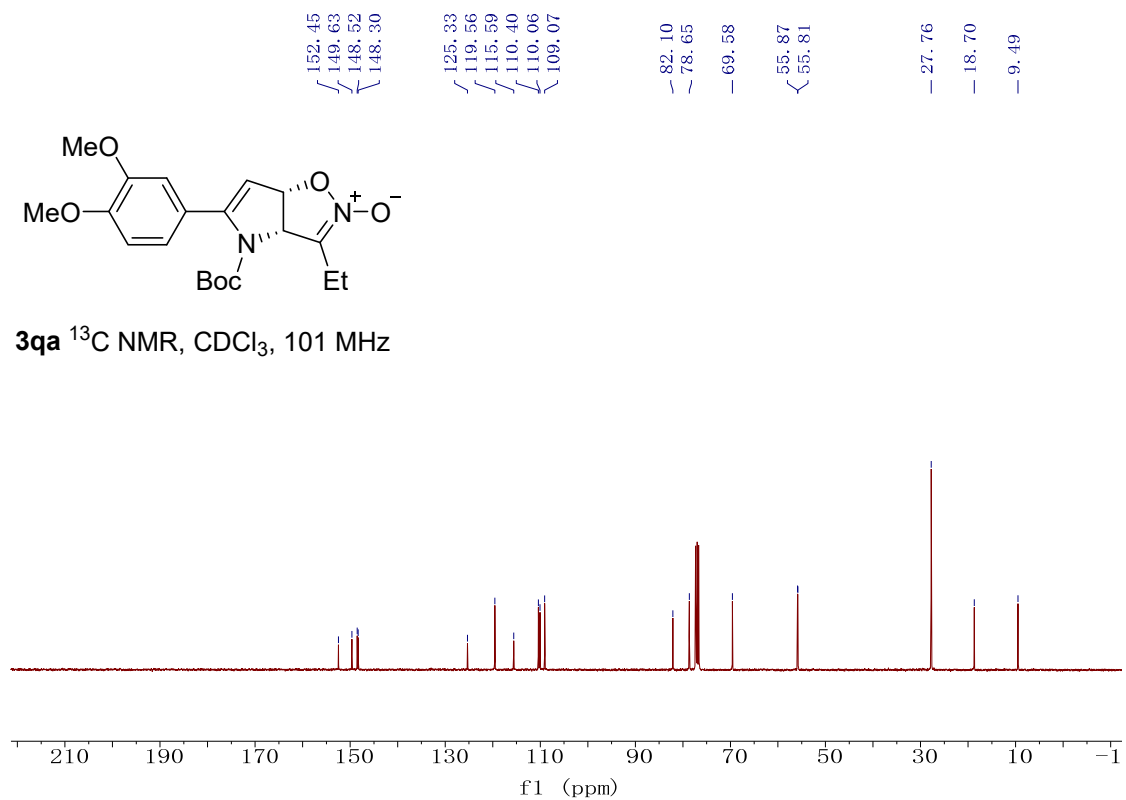

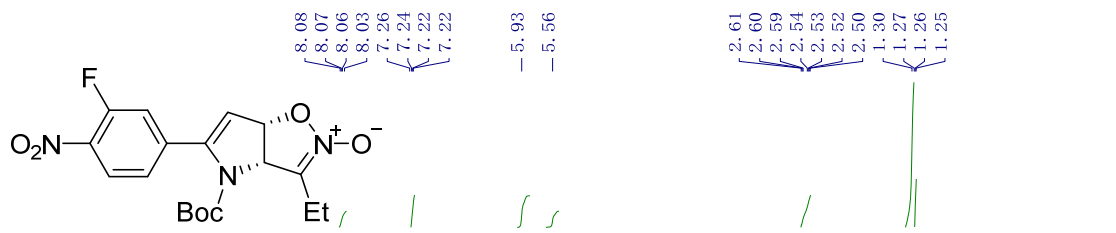

**3ra**  $^1\text{H}$  NMR,  $\text{CDCl}_3$ , 600 MHz

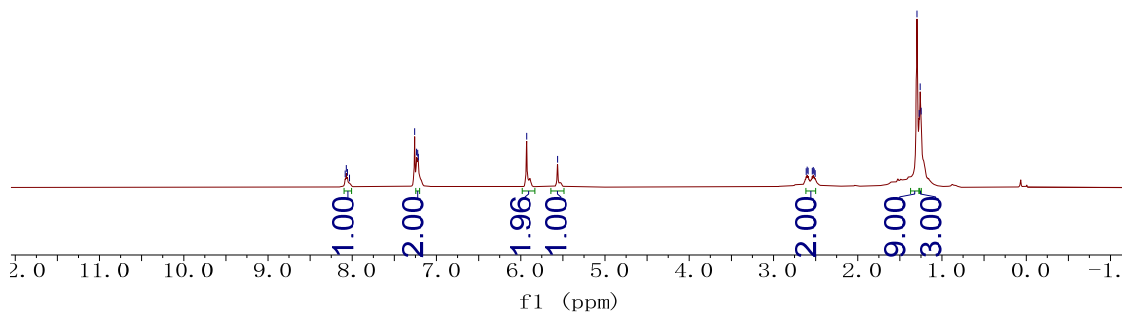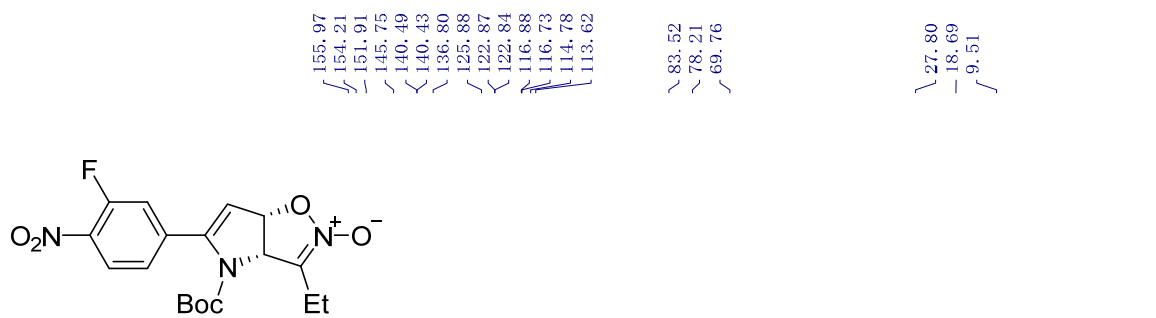

**3ra**  $^{13}\text{C}$  NMR,  $\text{CDCl}_3$ , 151 MHz

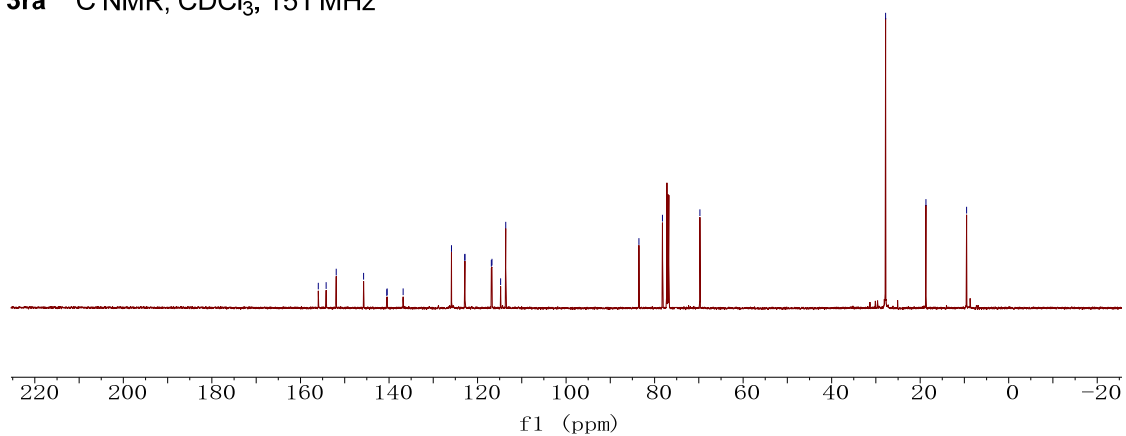

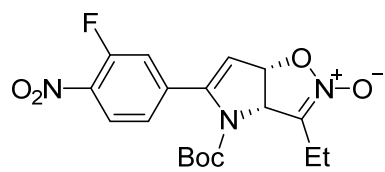

3ra <sup>19</sup>F NMR, CDCl<sub>3</sub>, 565 MHz

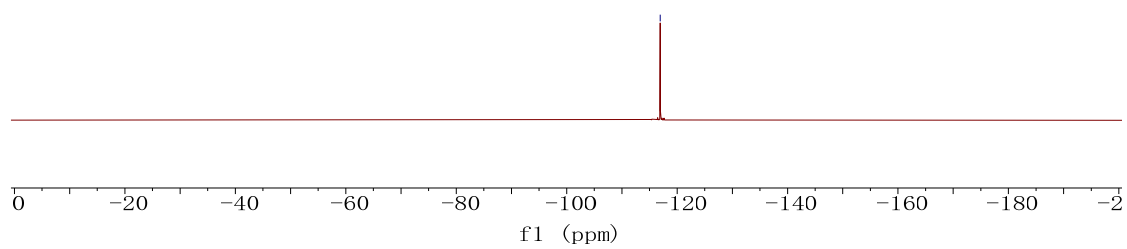

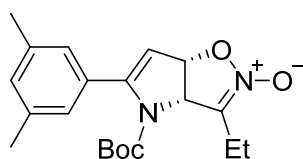

3sa <sup>1</sup>H NMR, CDCl<sub>3</sub>, 400 MHz

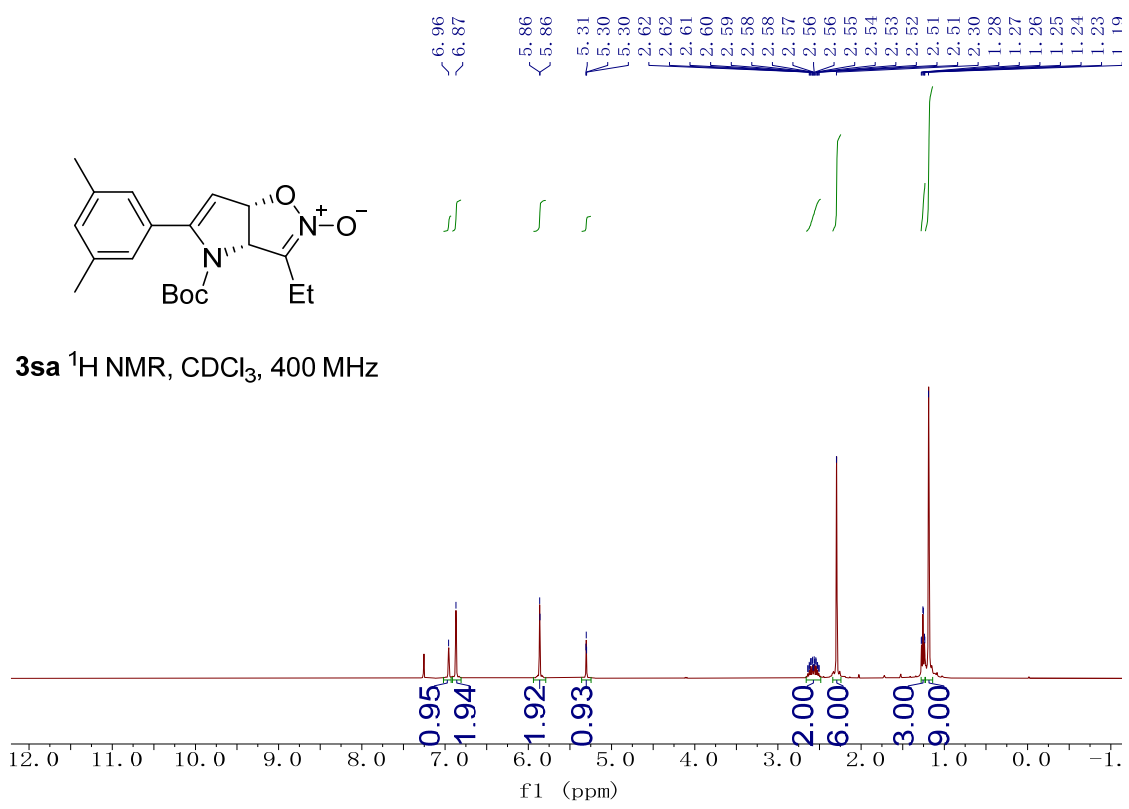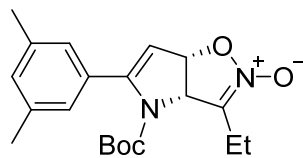

3sa <sup>13</sup>C NMR, CDCl<sub>3</sub>, 101 MHz

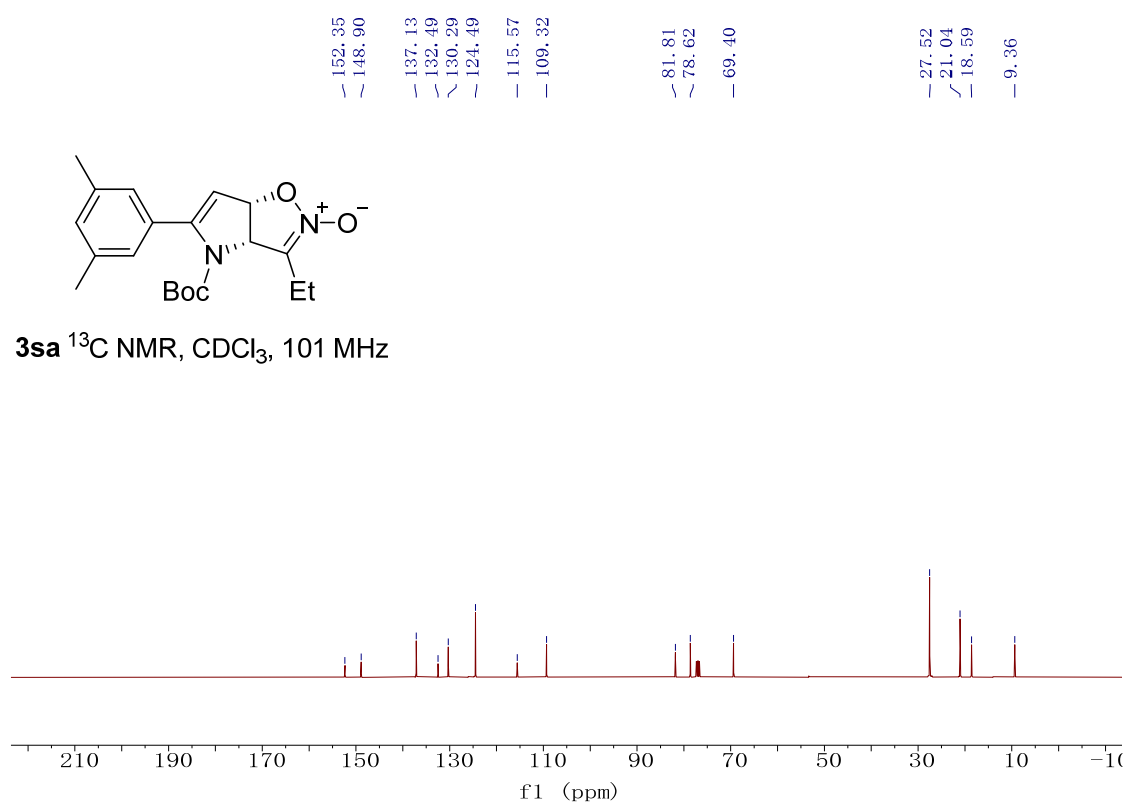

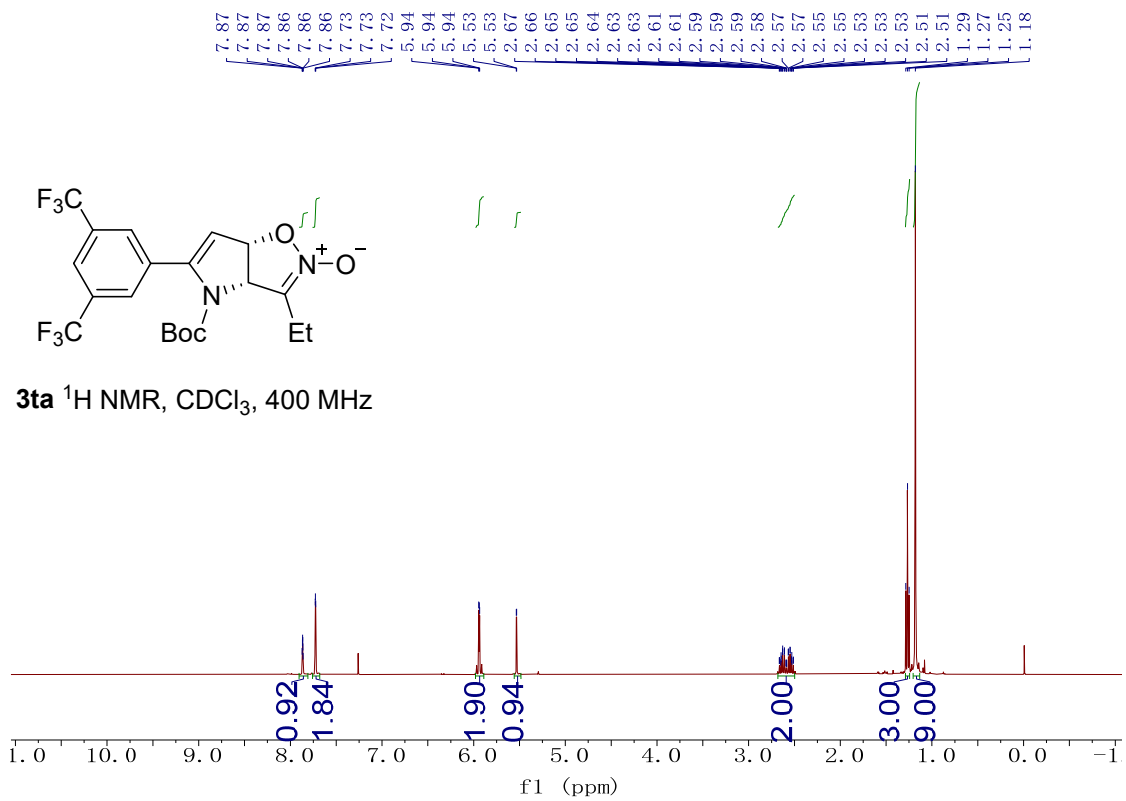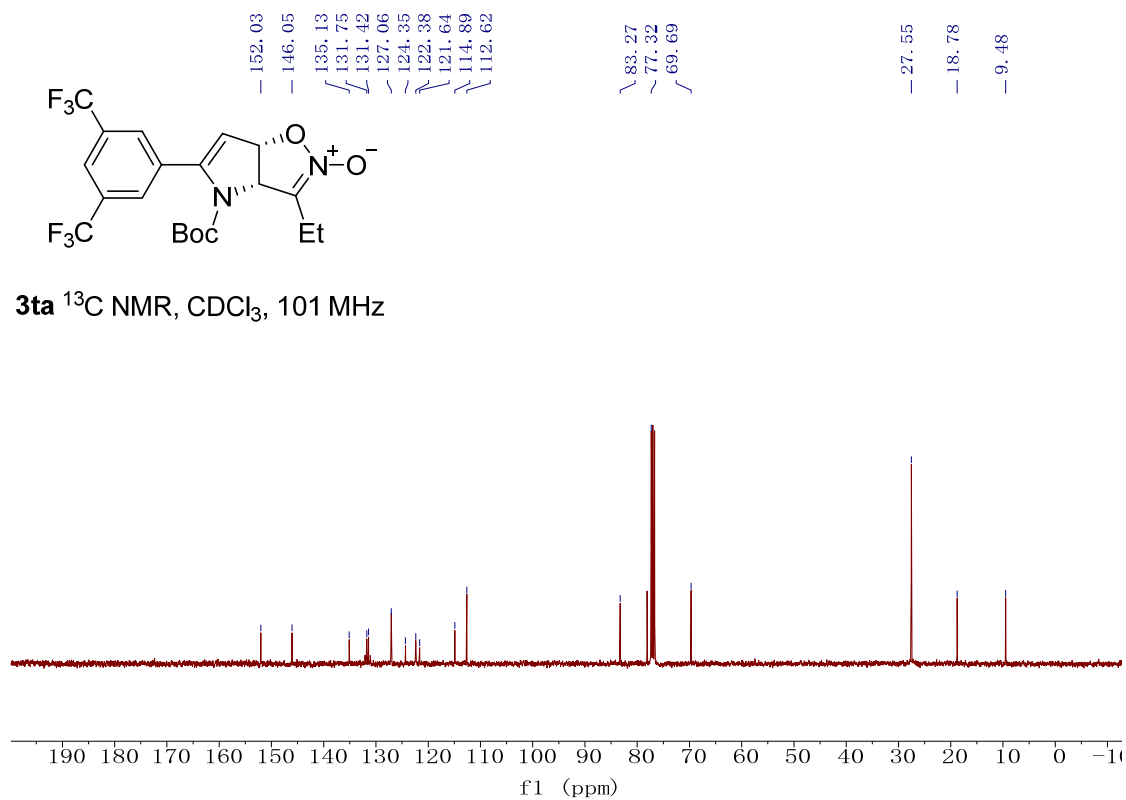



-62.89

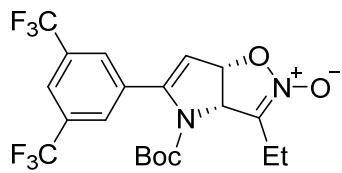

**3ta** <sup>19</sup>F NMR, CDCl<sub>3</sub>, 565 MHz

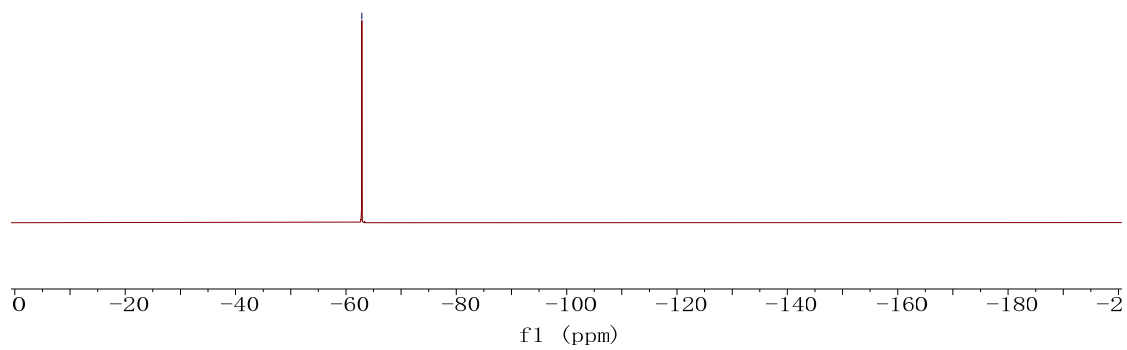

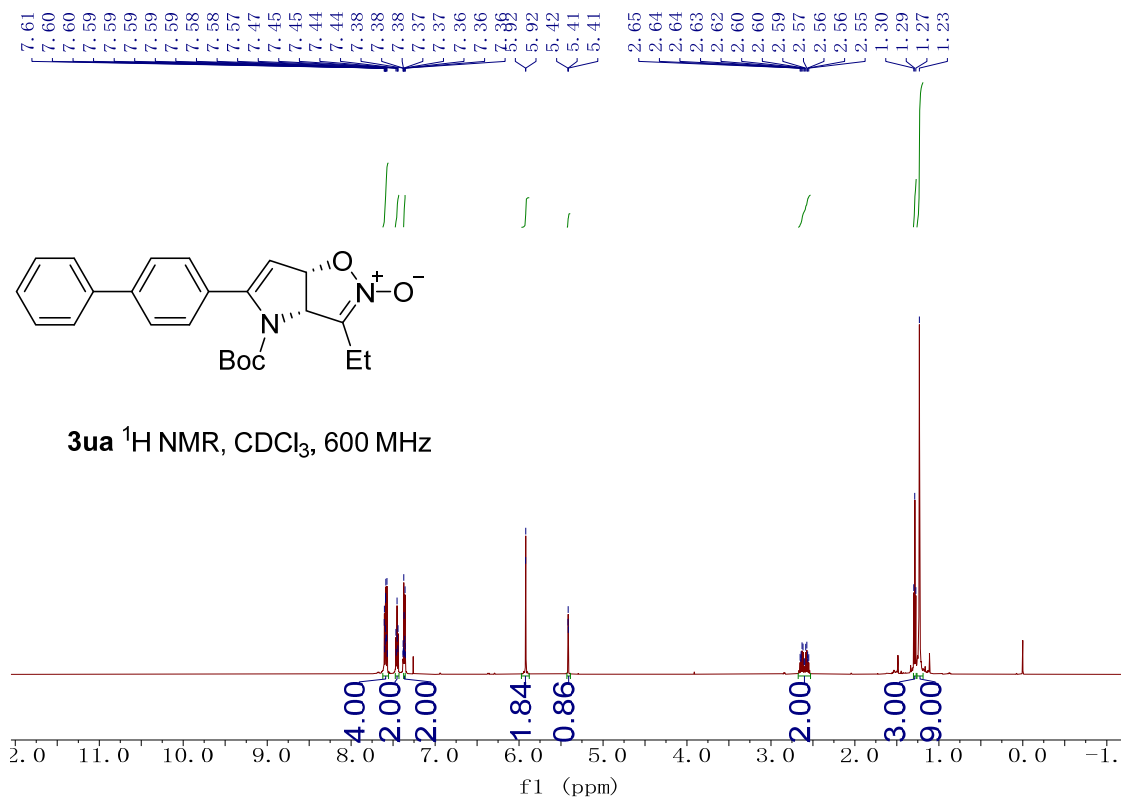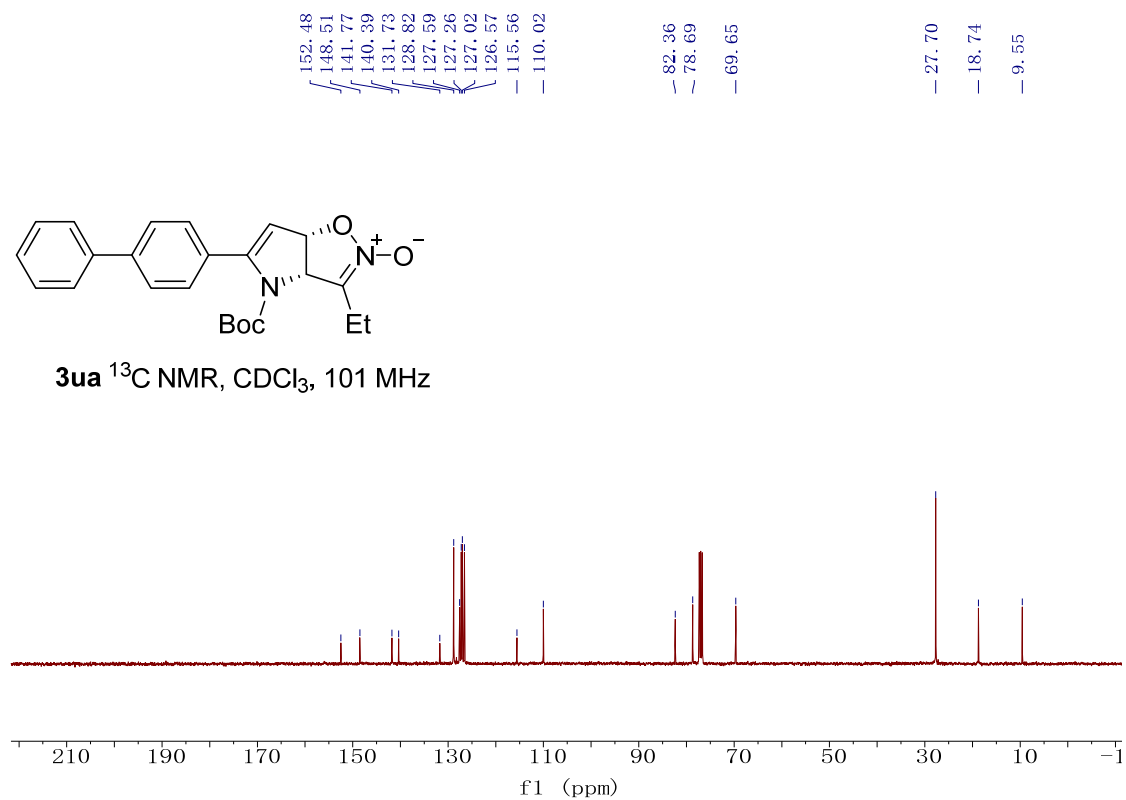

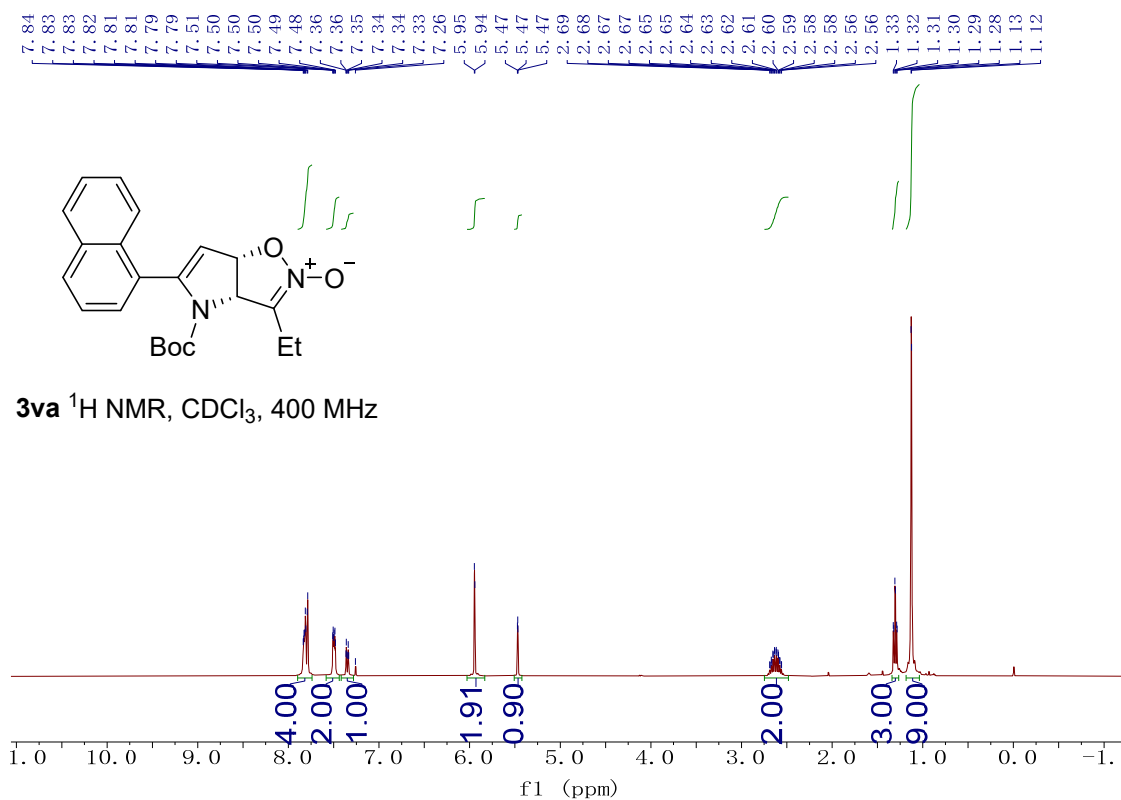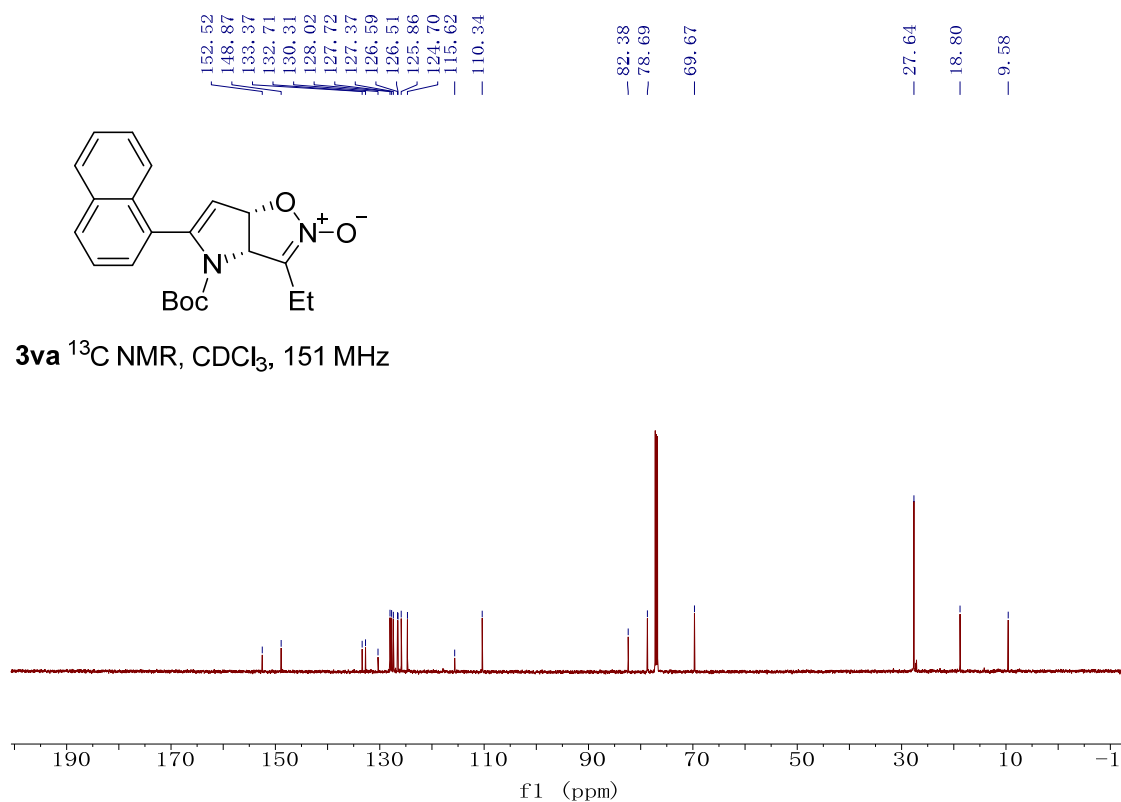

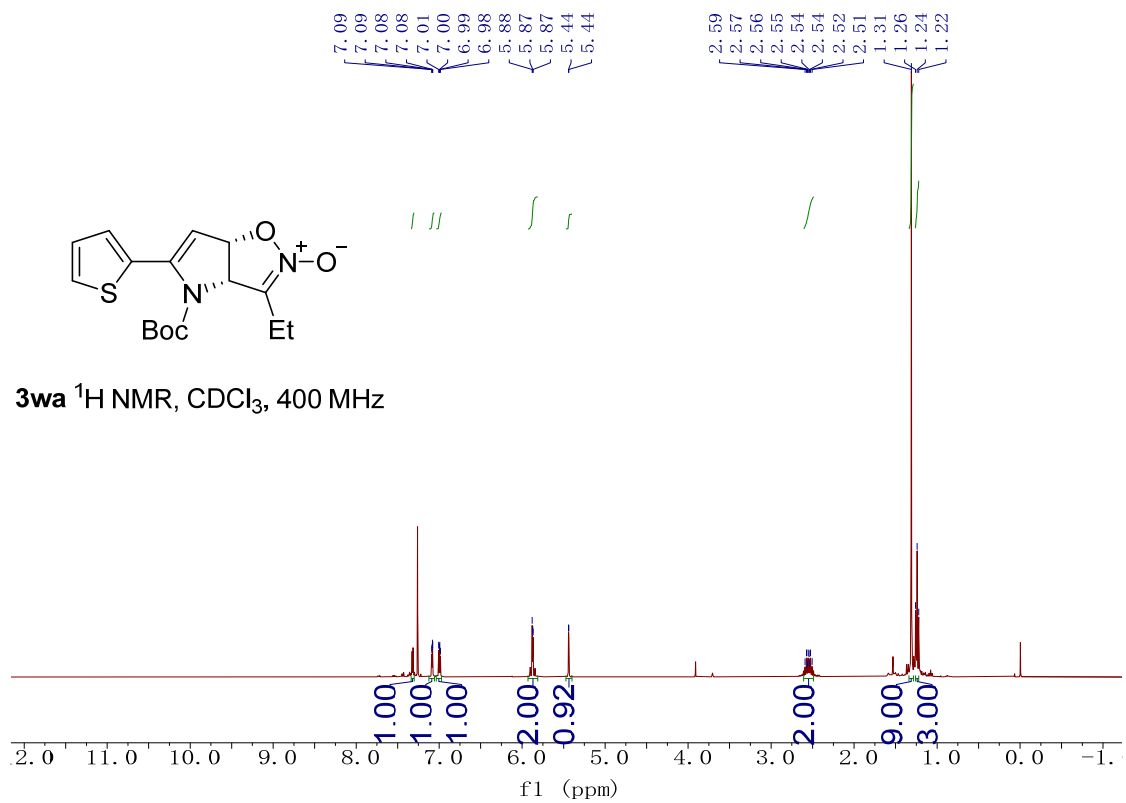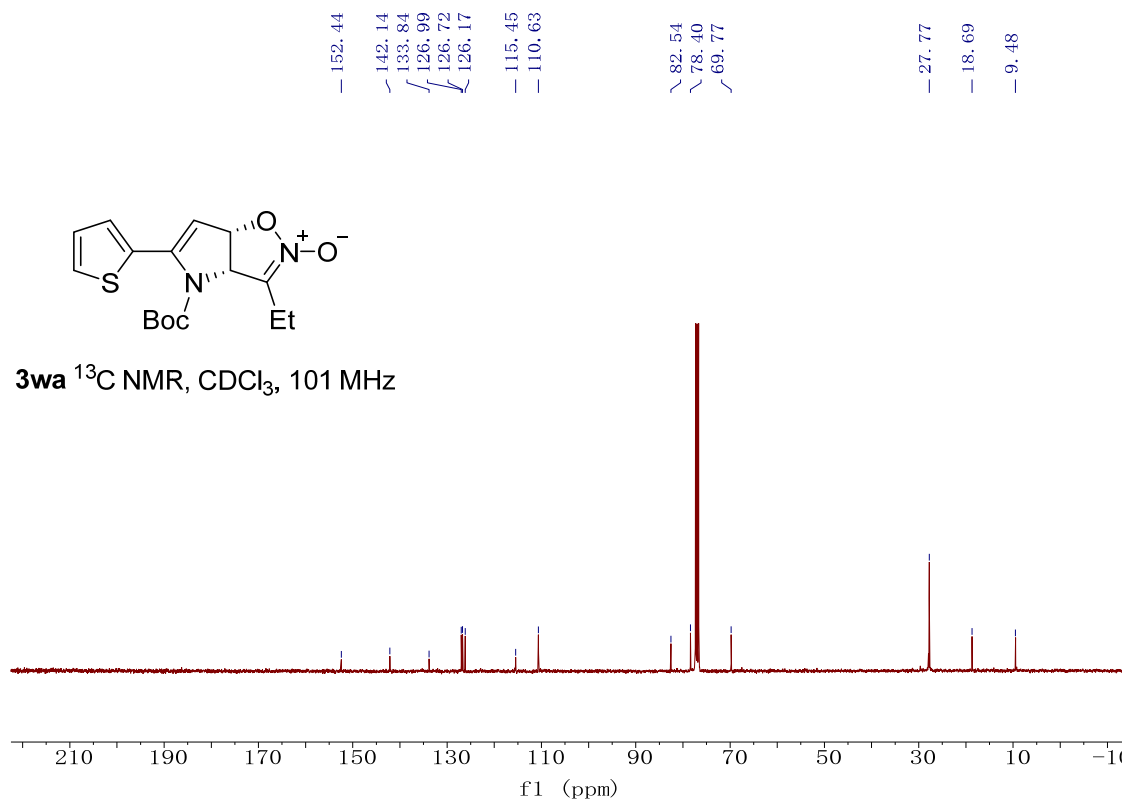

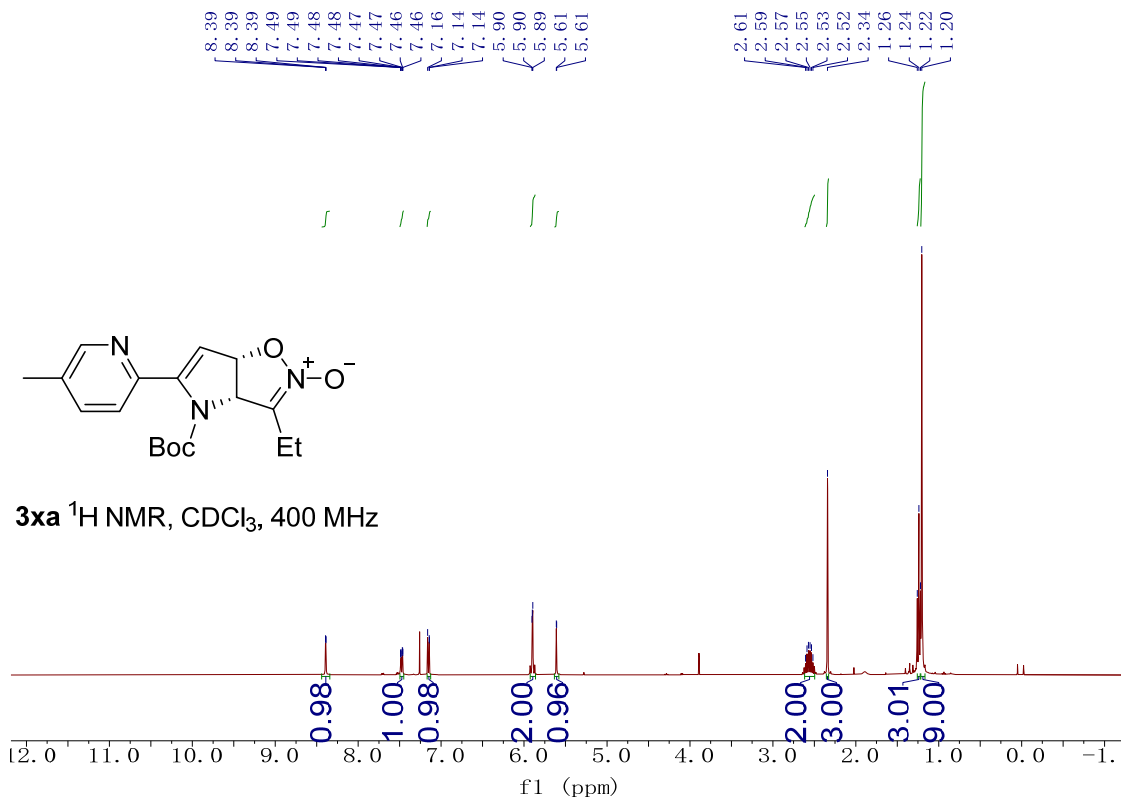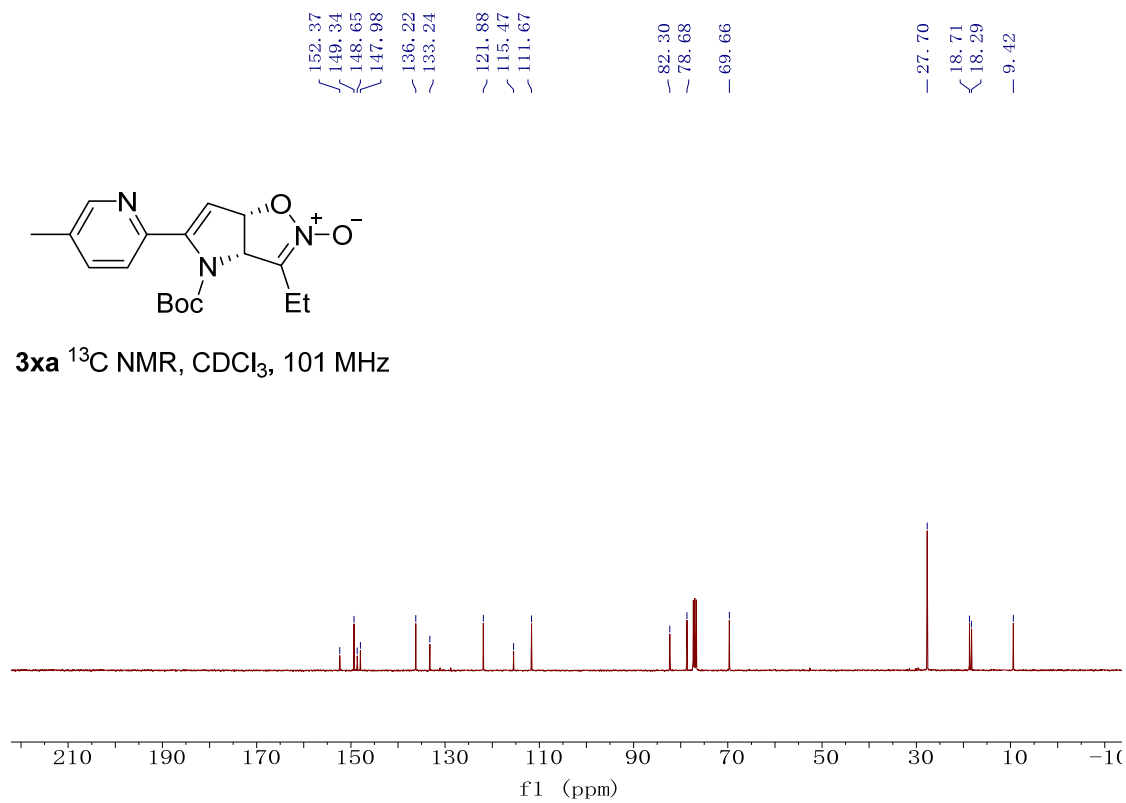

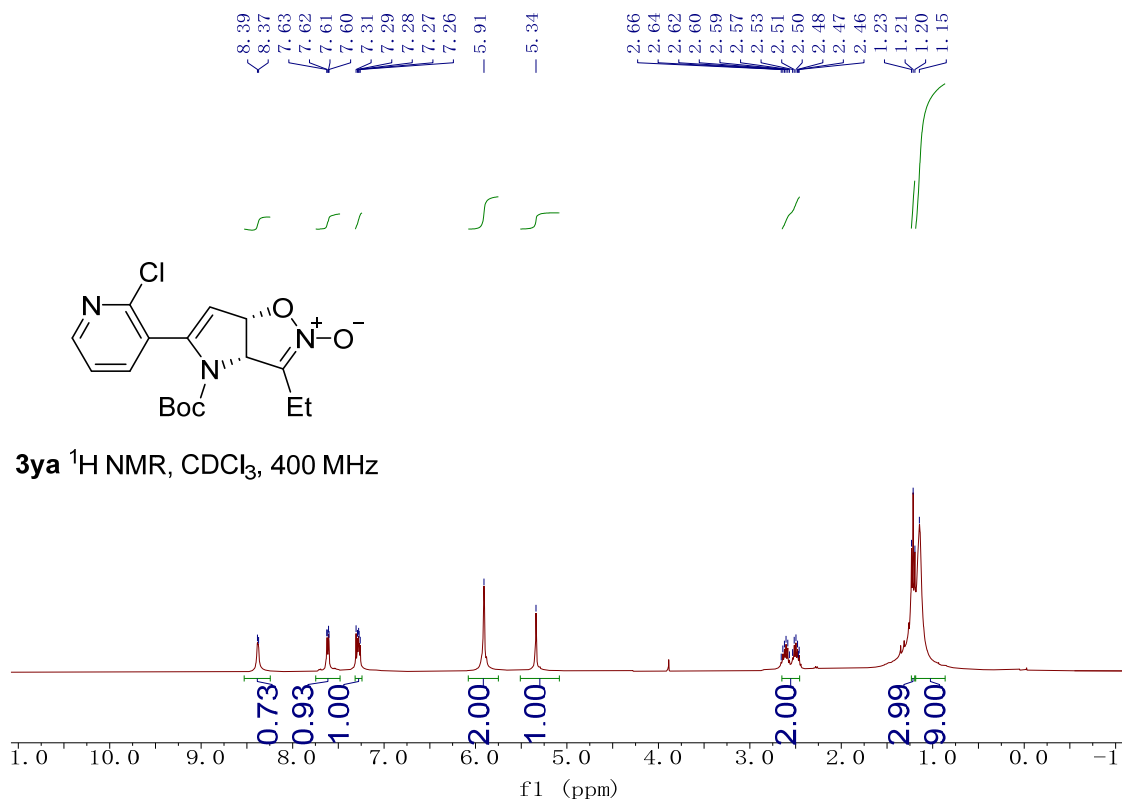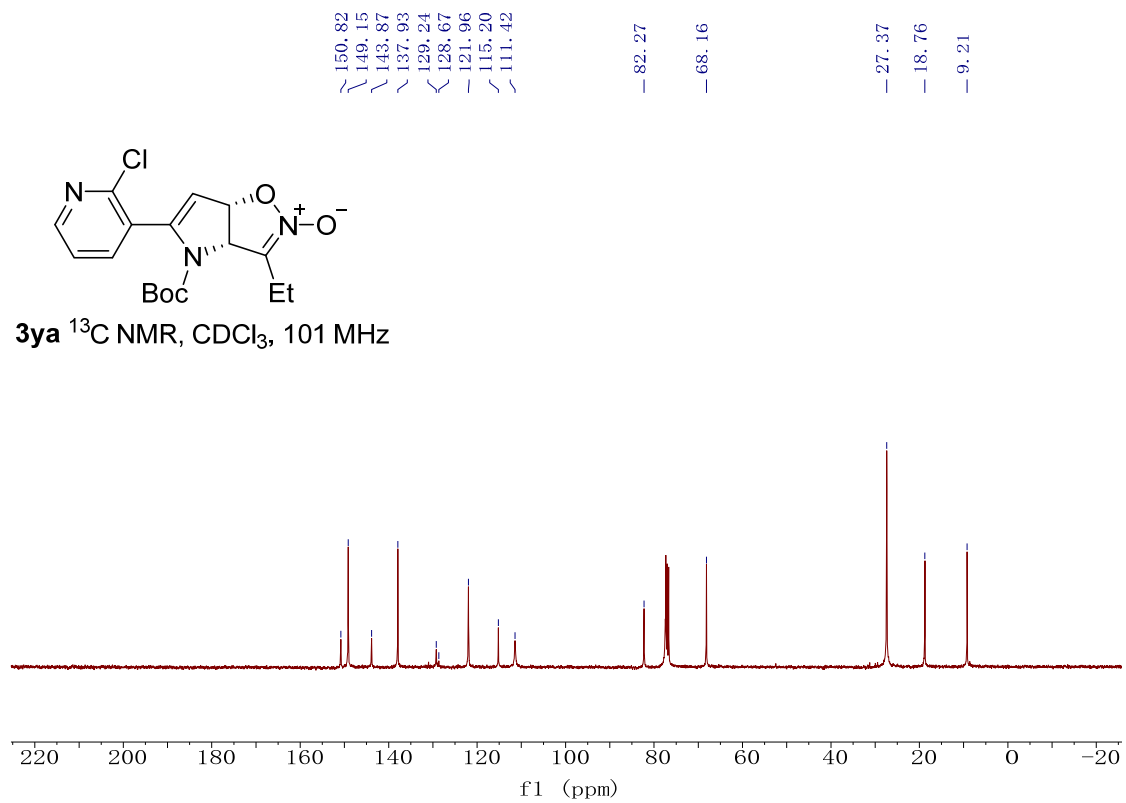

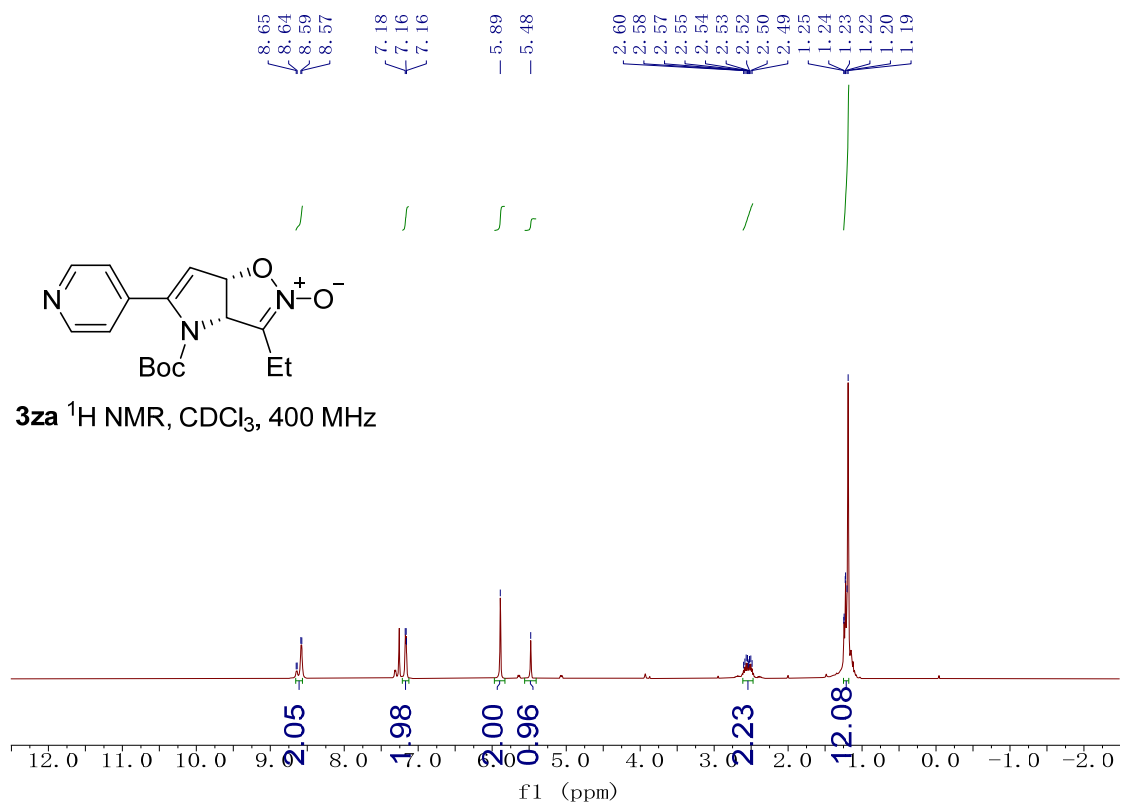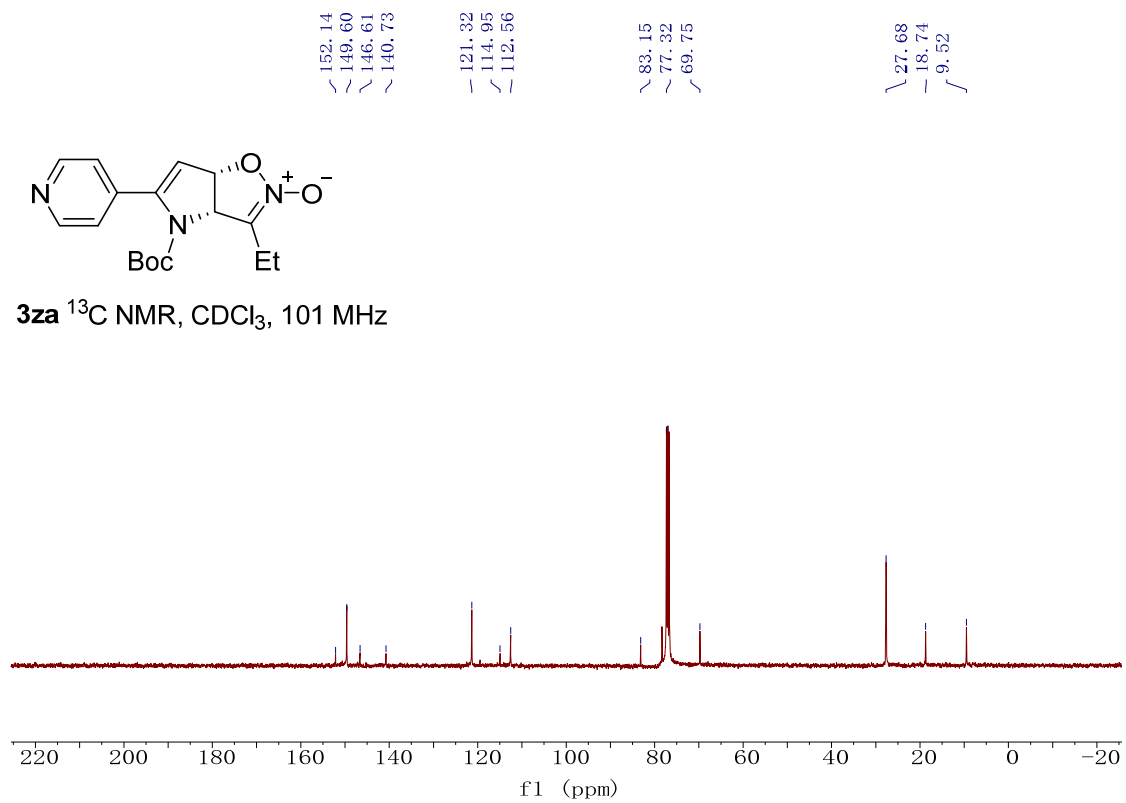

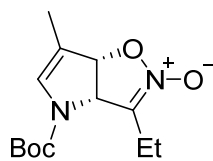

3a'a <sup>1</sup>H NMR, CDCl<sub>3</sub>, 400 MHz

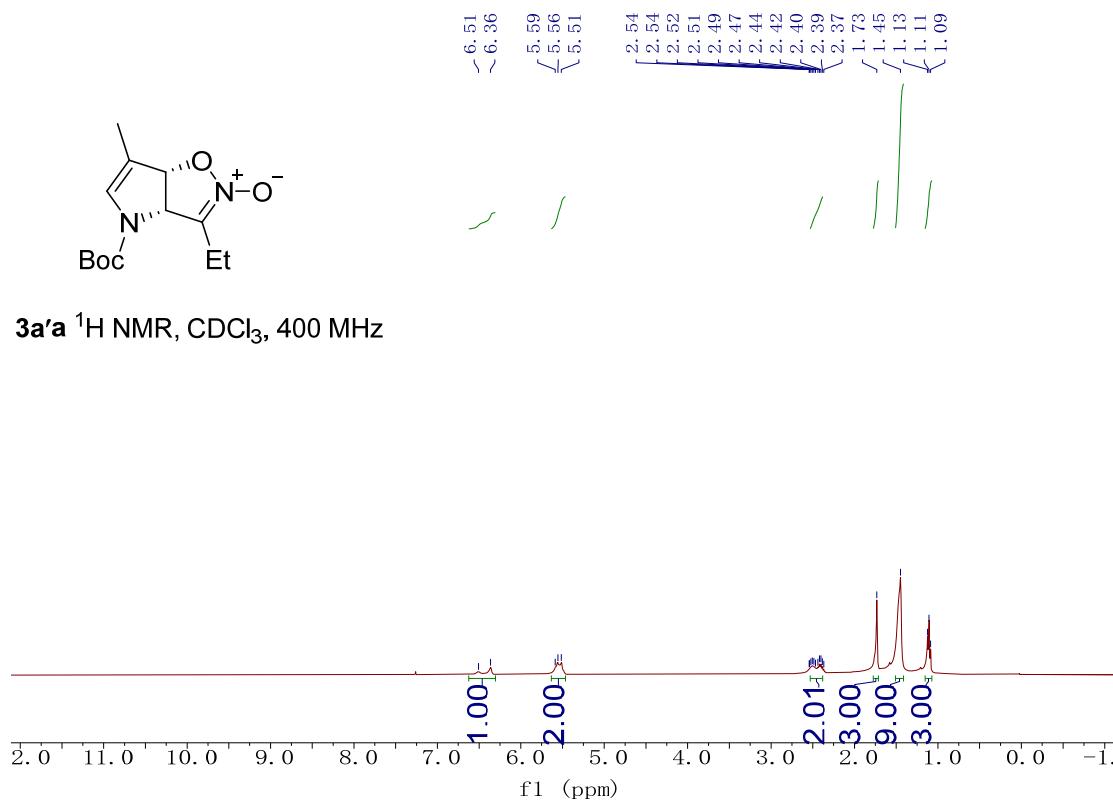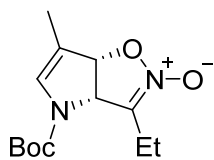

3a'a <sup>13</sup>C NMR, CDCl<sub>3</sub>, 101 MHz

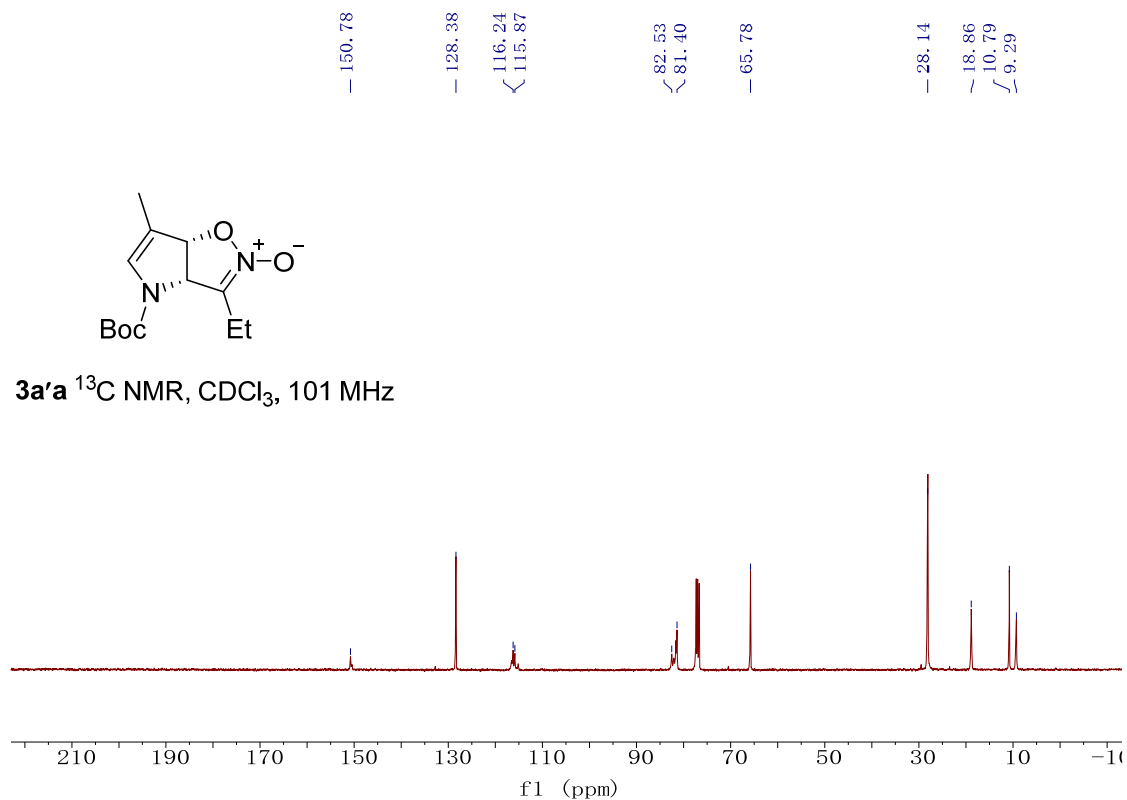



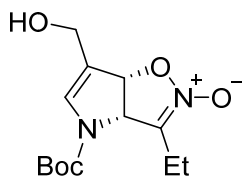

**3b'a**  $^1\text{H}$  NMR,  $\text{CDCl}_3$ , 600 MHz

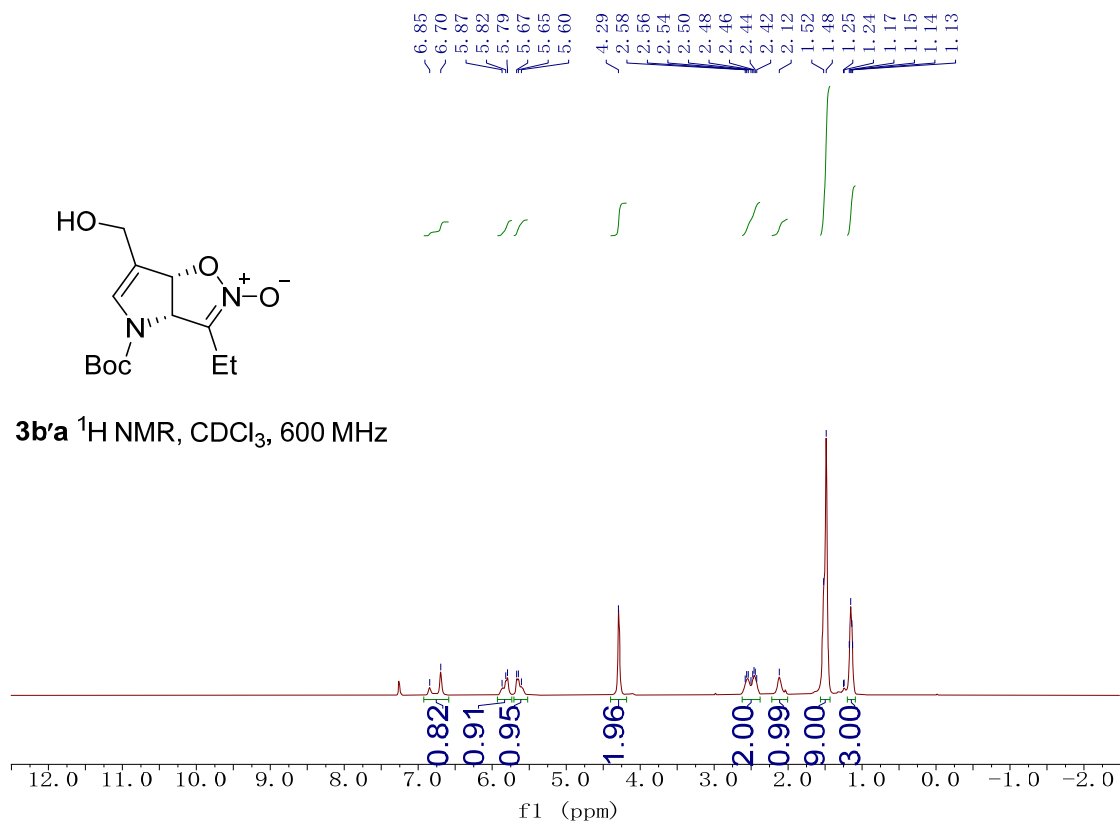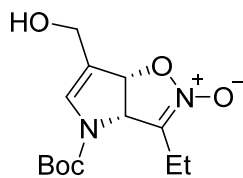

**3b'a**  $^{13}\text{C}$  NMR,  $\text{CDCl}_3$ , 101 MHz

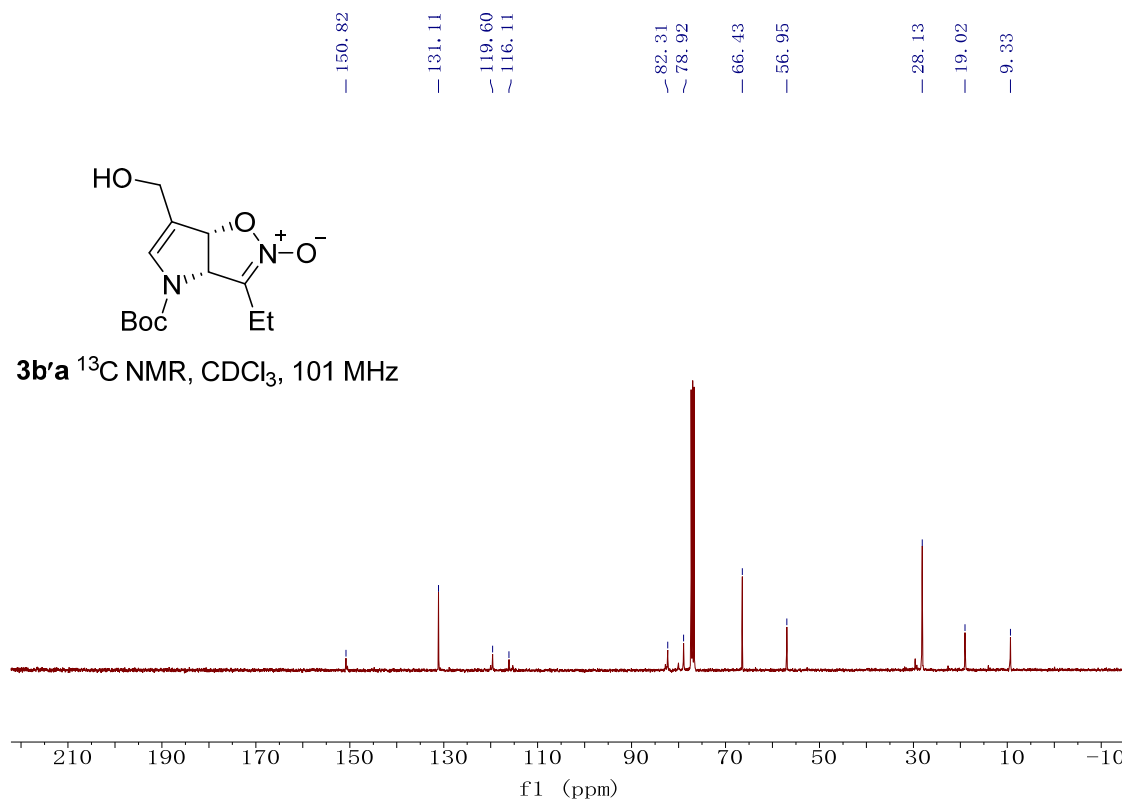

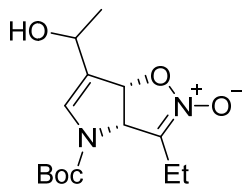

**3c'a**  $^1\text{H}$  NMR,  $\text{CDCl}_3$ , 600 MHz

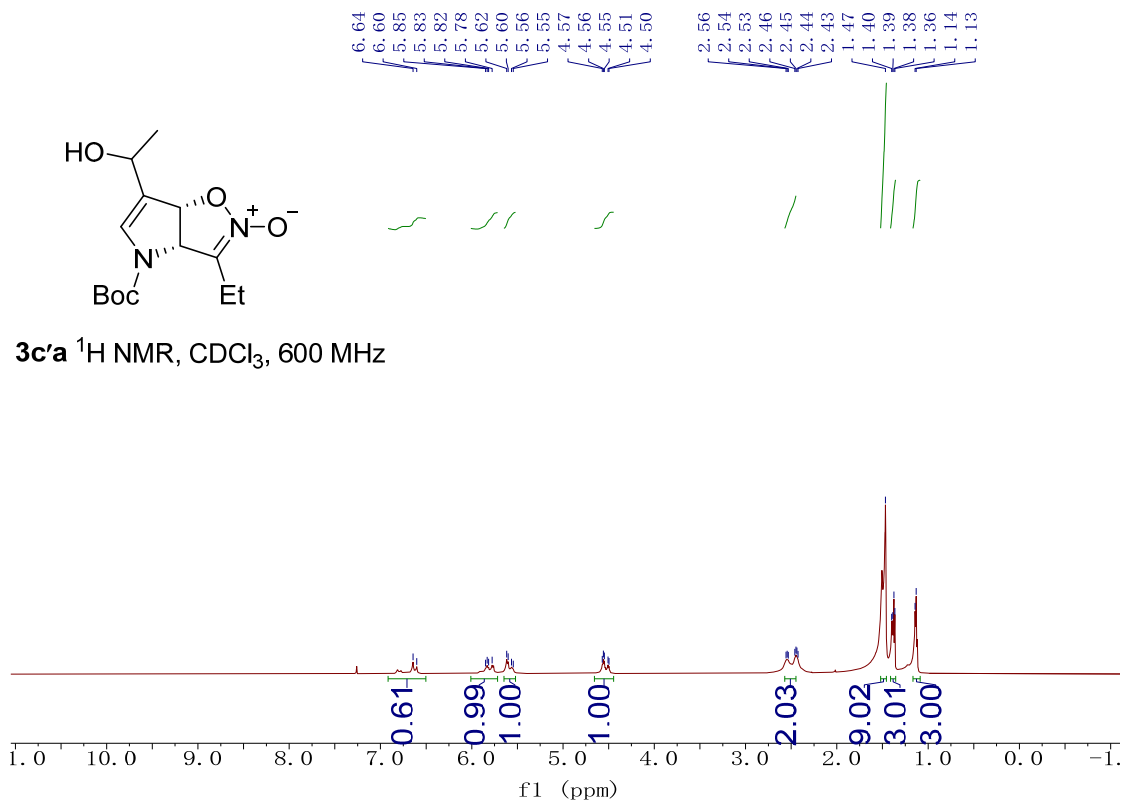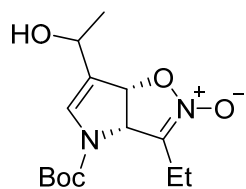

**3c'a**  $^{13}\text{C}$  NMR,  $\text{CDCl}_3$ , 101 MHz

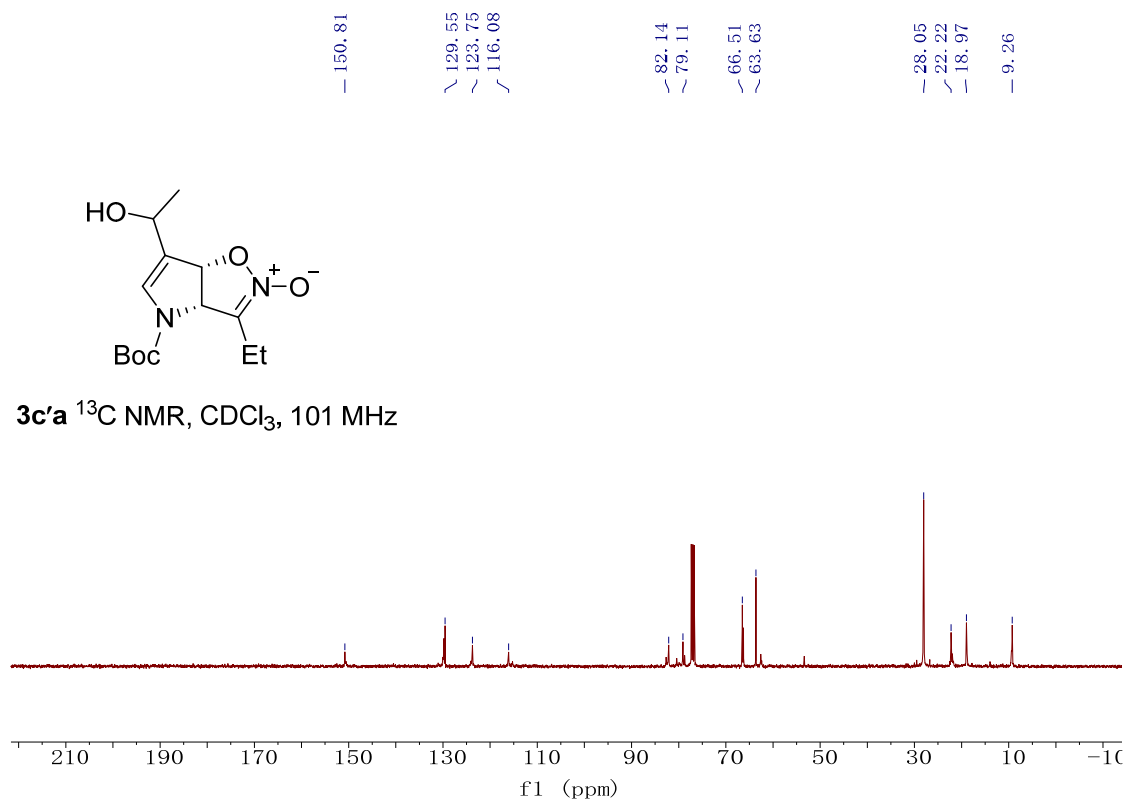

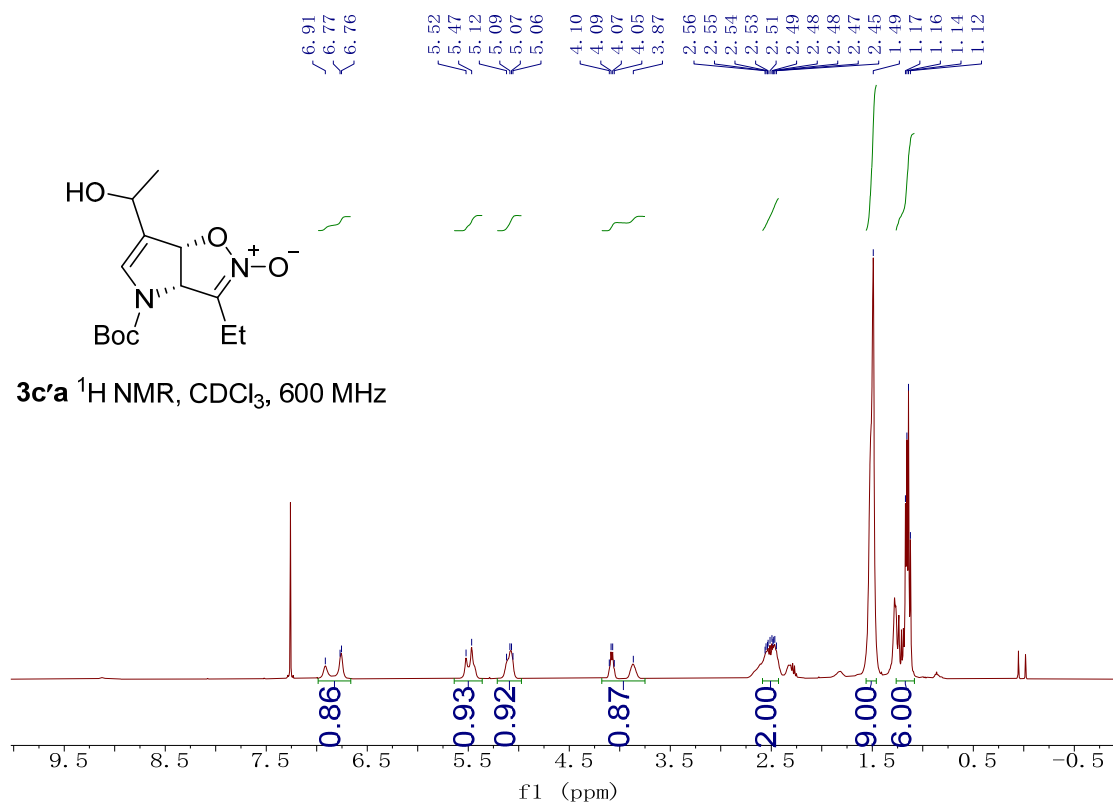

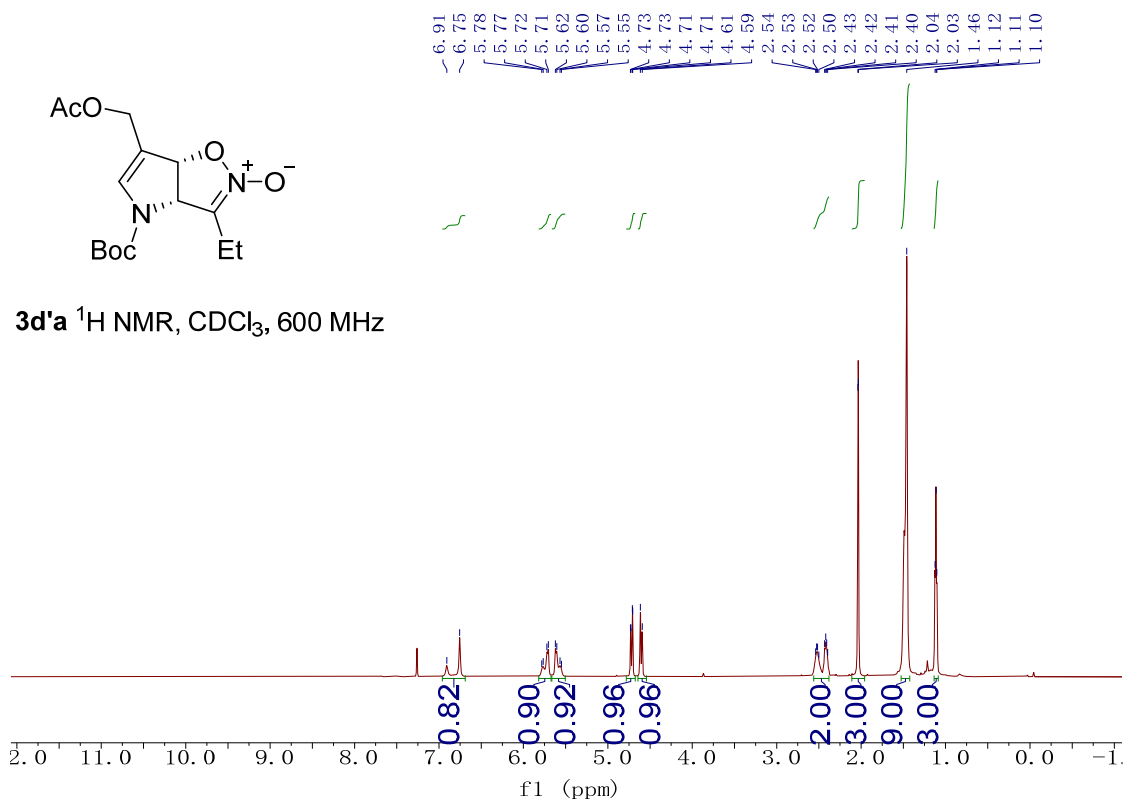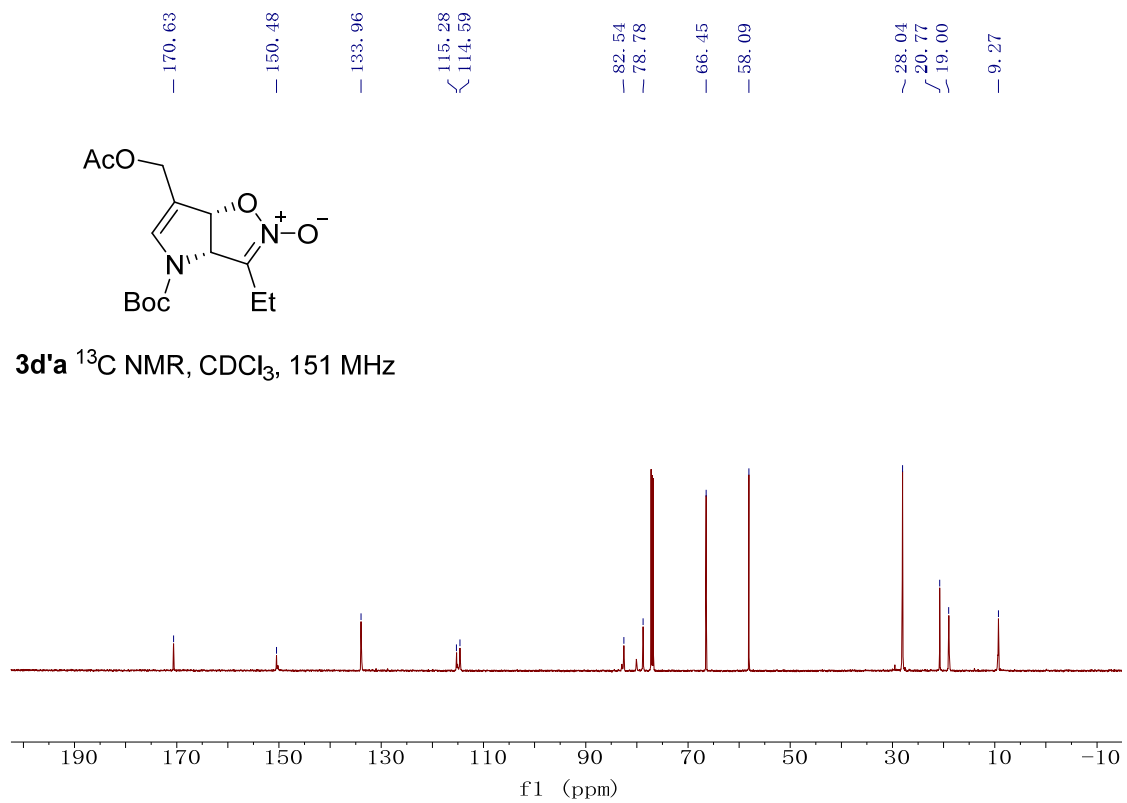

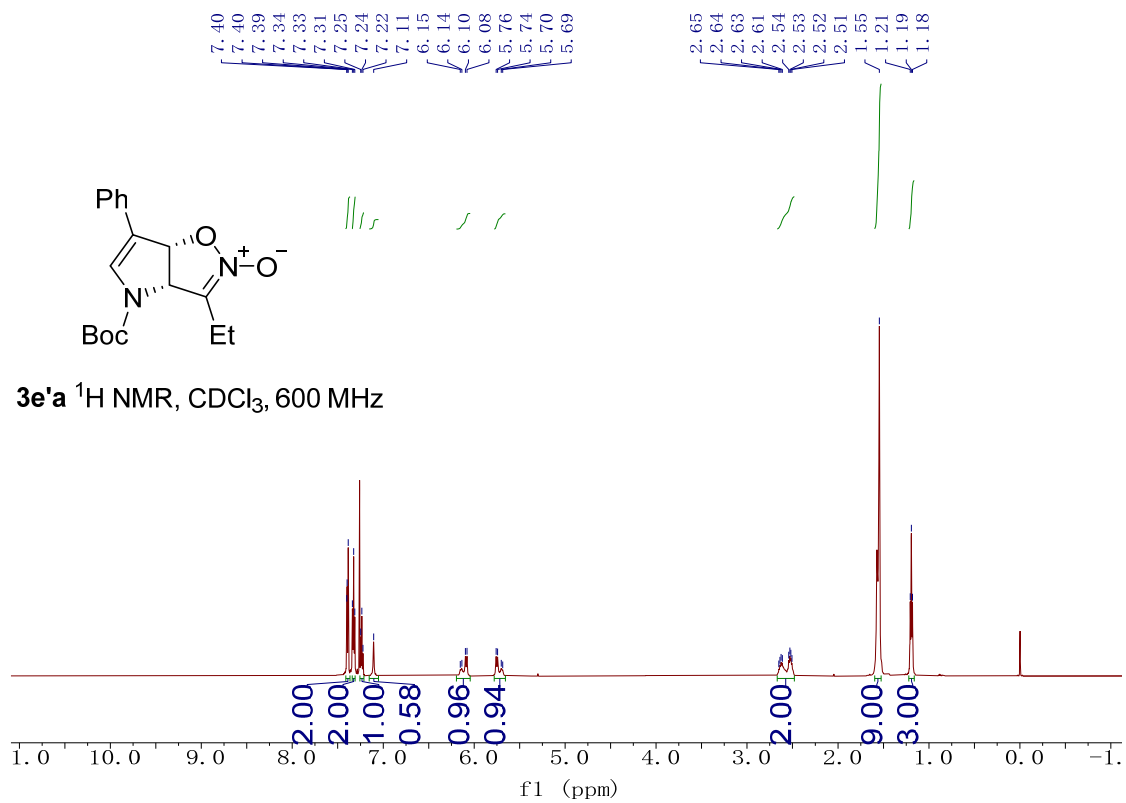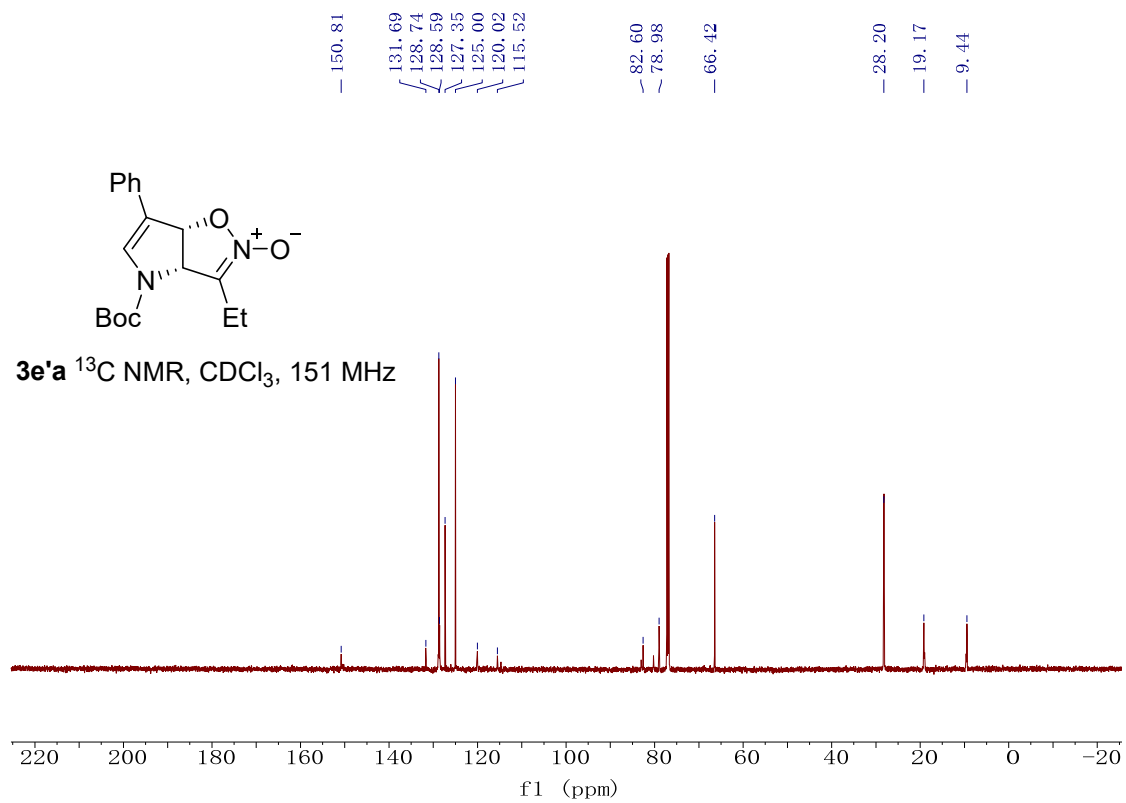

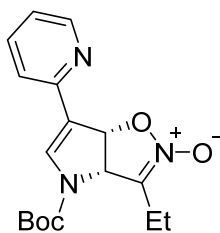

**3fa**  $^1\text{H}$  NMR,  $\text{CDCl}_3$ , 400 MHz

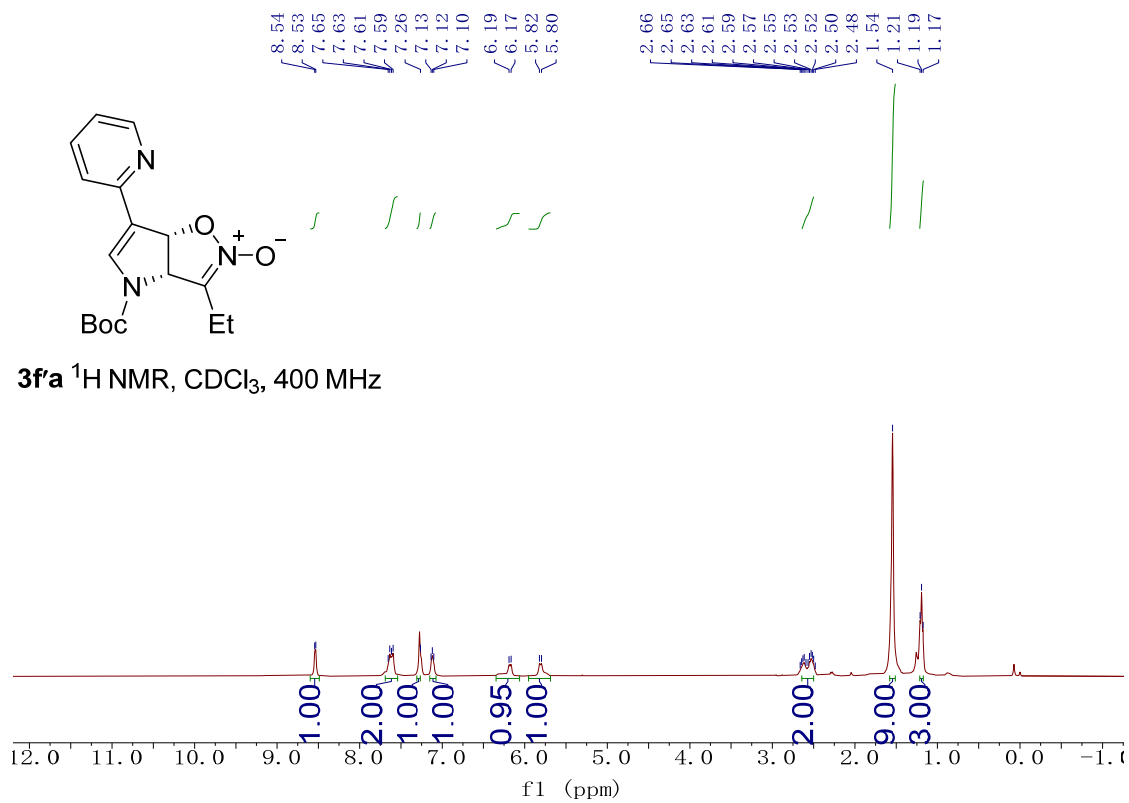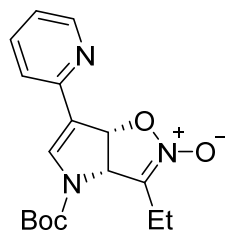

**3fa**  $^{13}\text{C}$  NMR,  $\text{CDCl}_3$ , 101 MHz

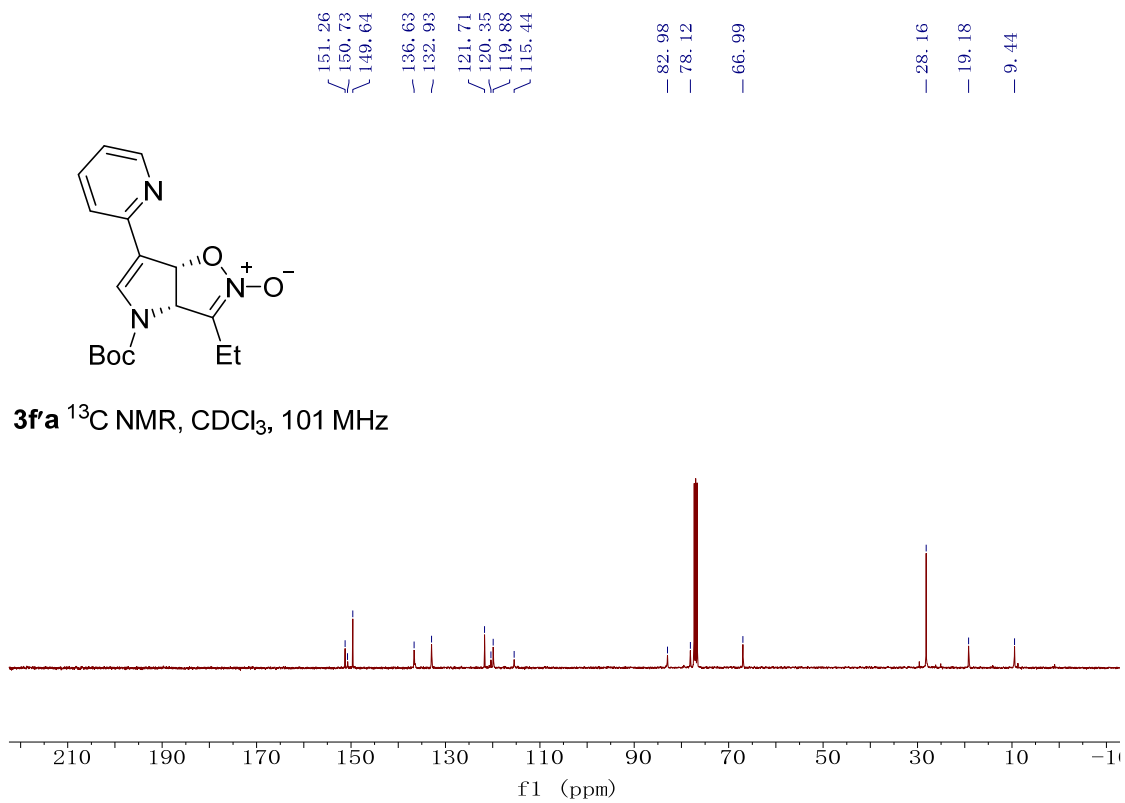

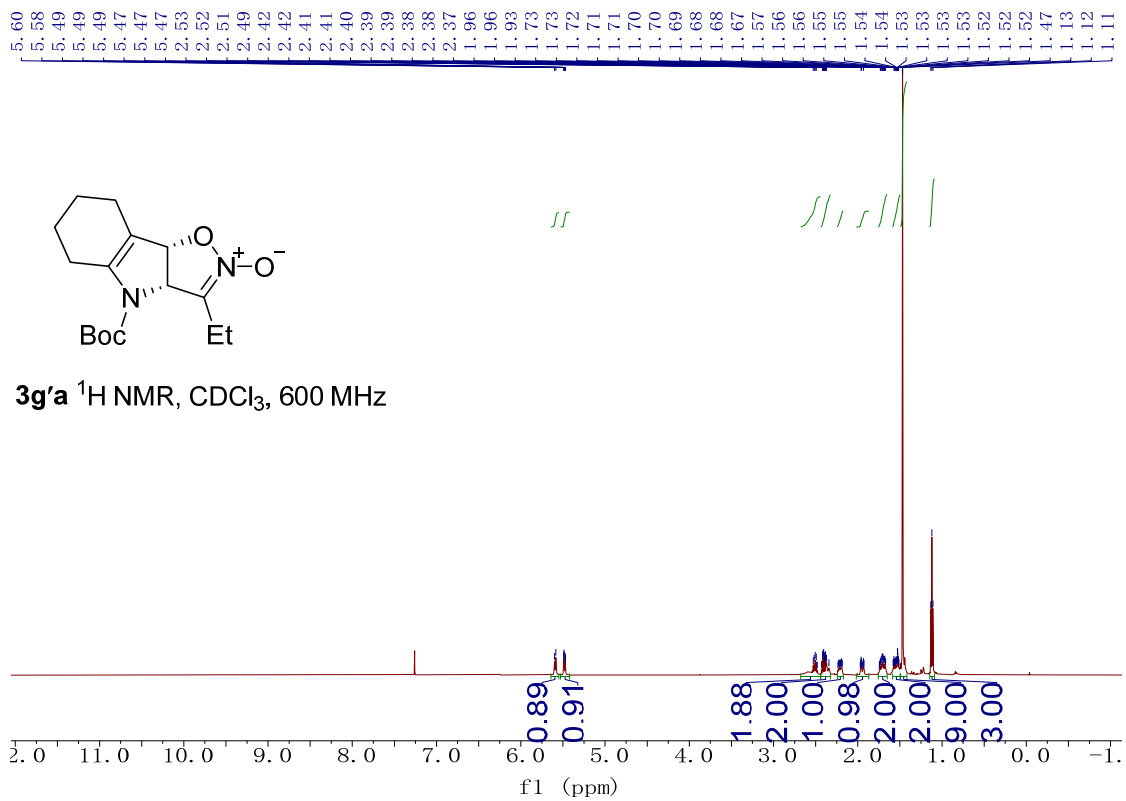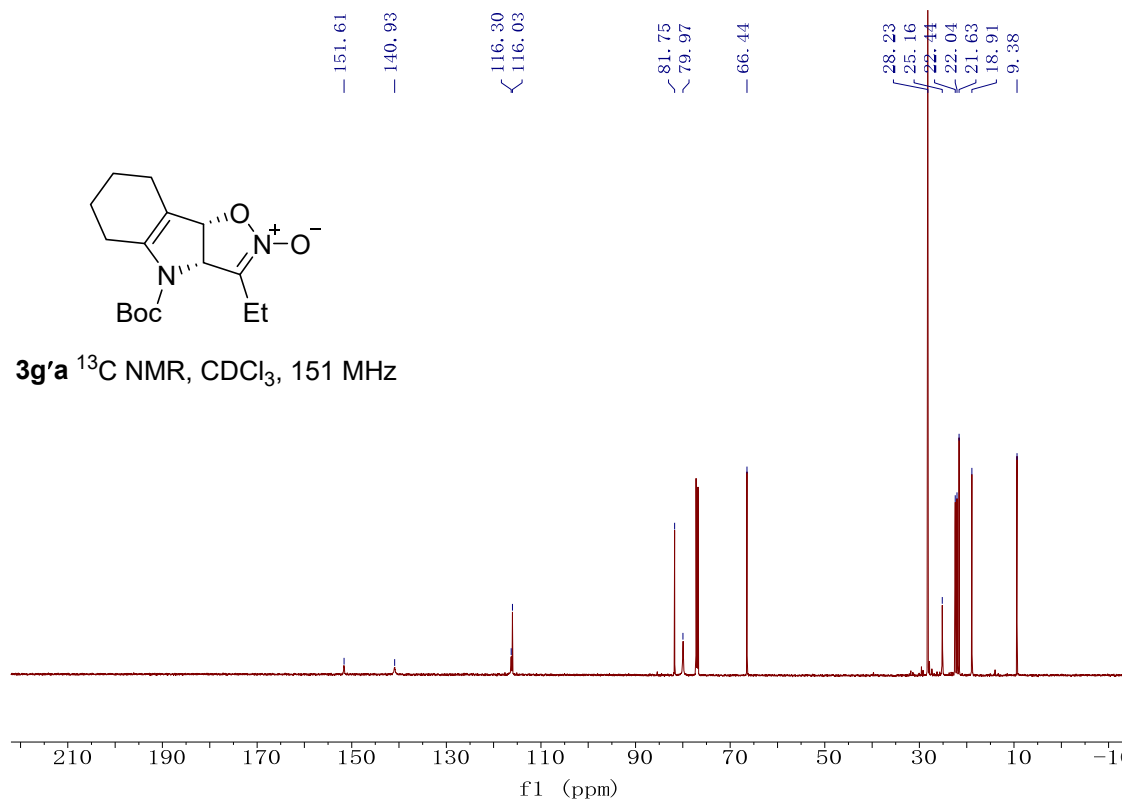

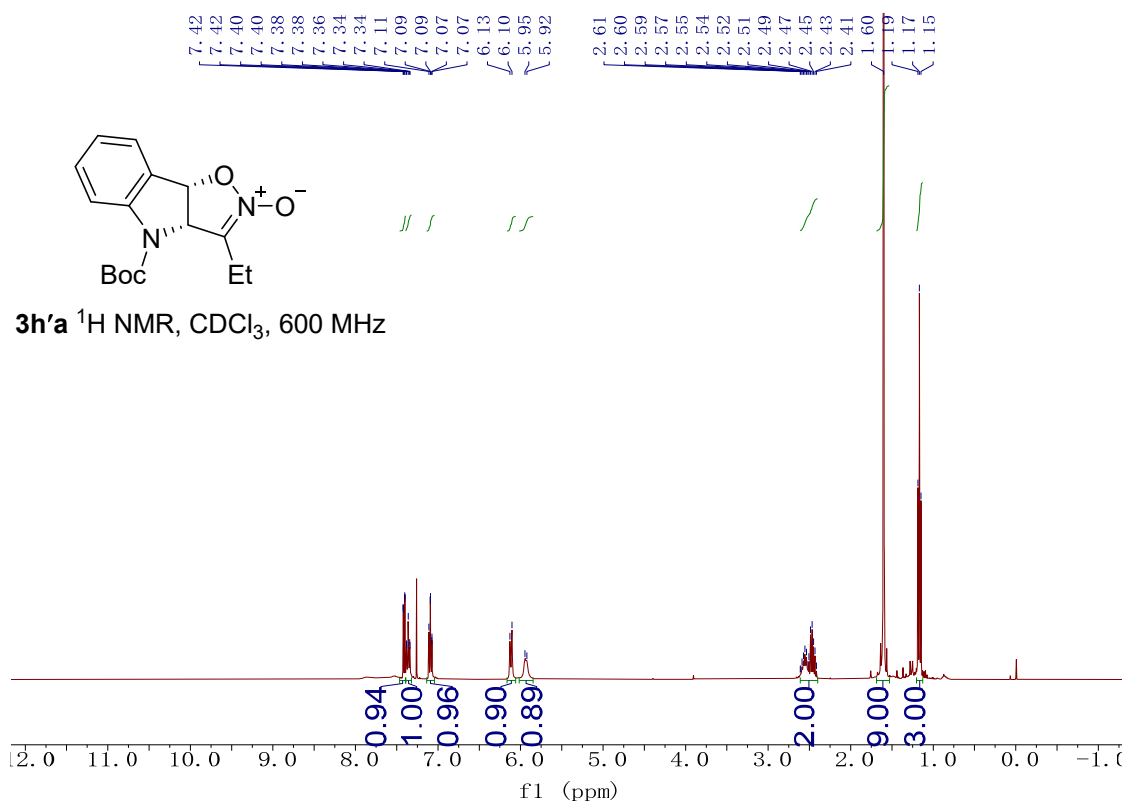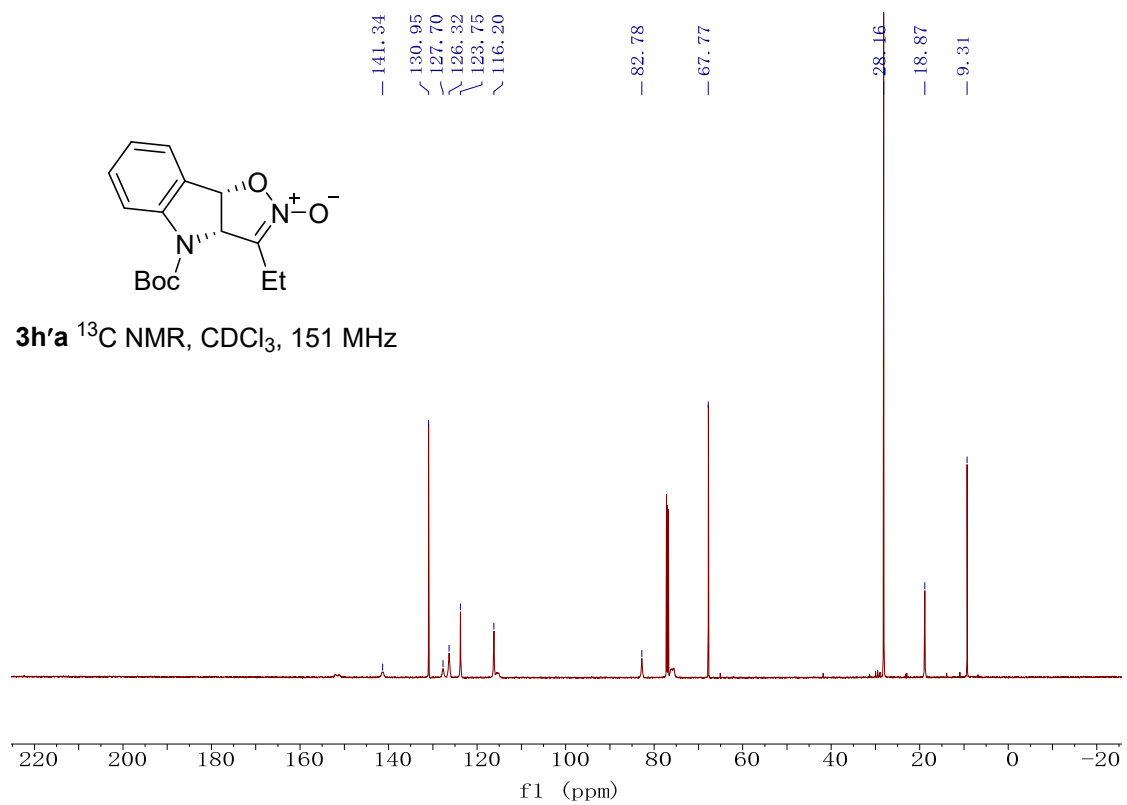



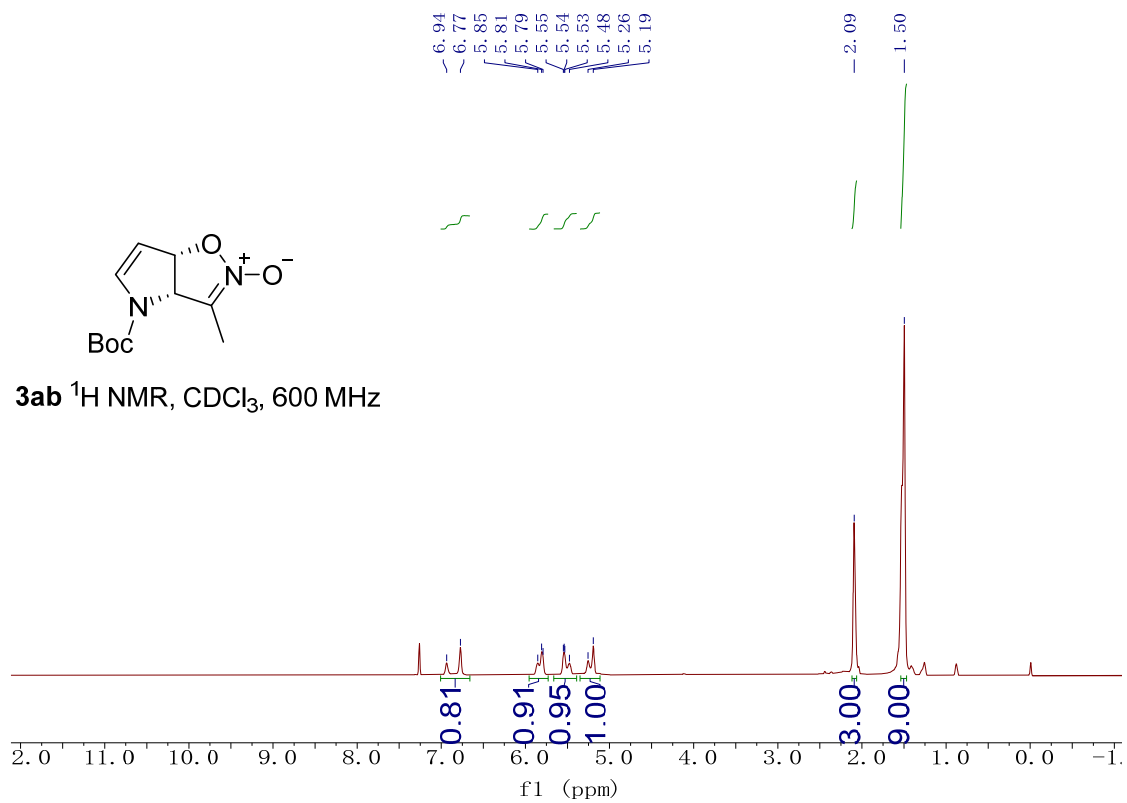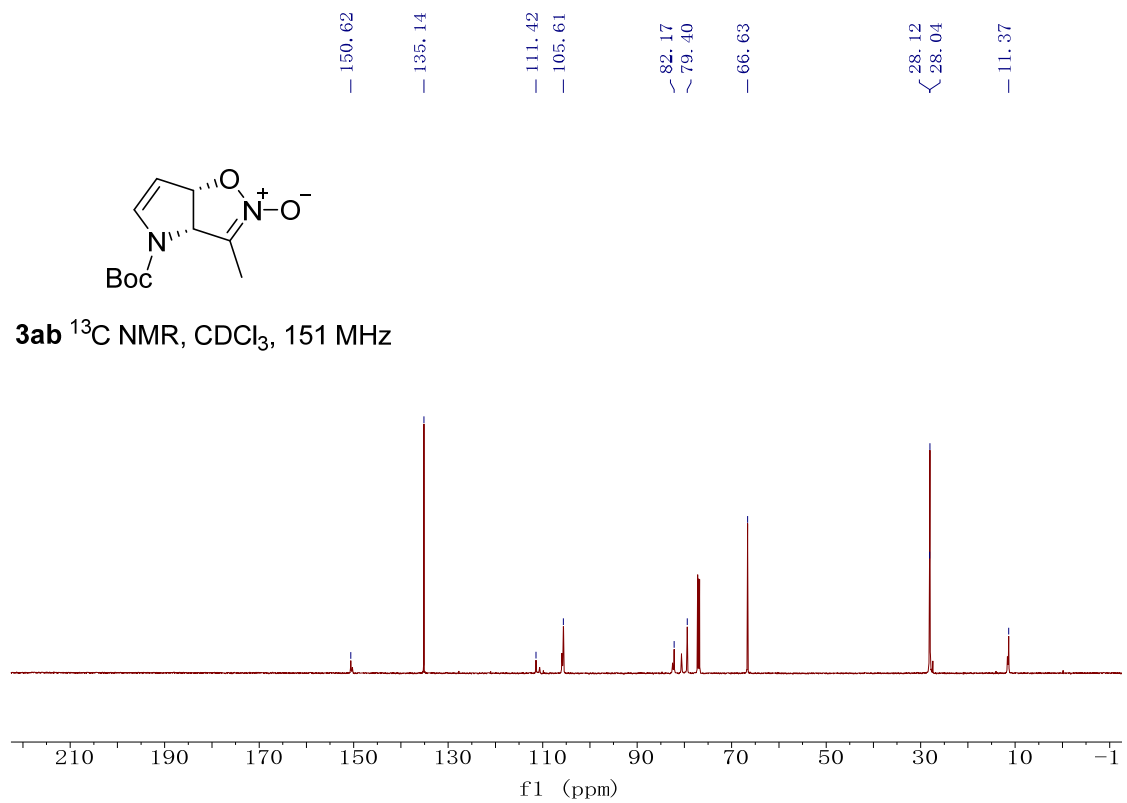

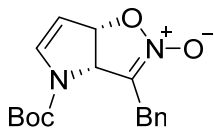

**3ac**  $^1\text{H}$  NMR,  $\text{CDCl}_3$ , 400 MHz

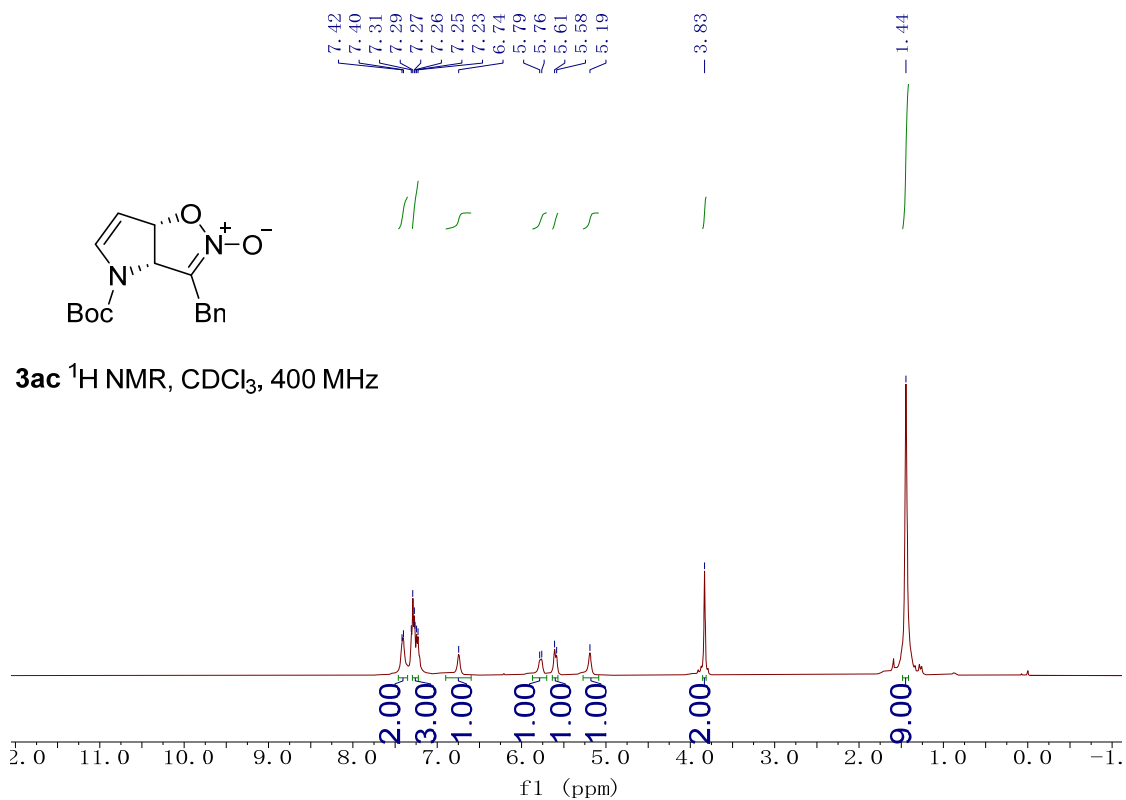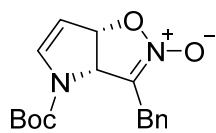

**3ac**  $^{13}\text{C}$  NMR,  $\text{CDCl}_3$ , 101 MHz

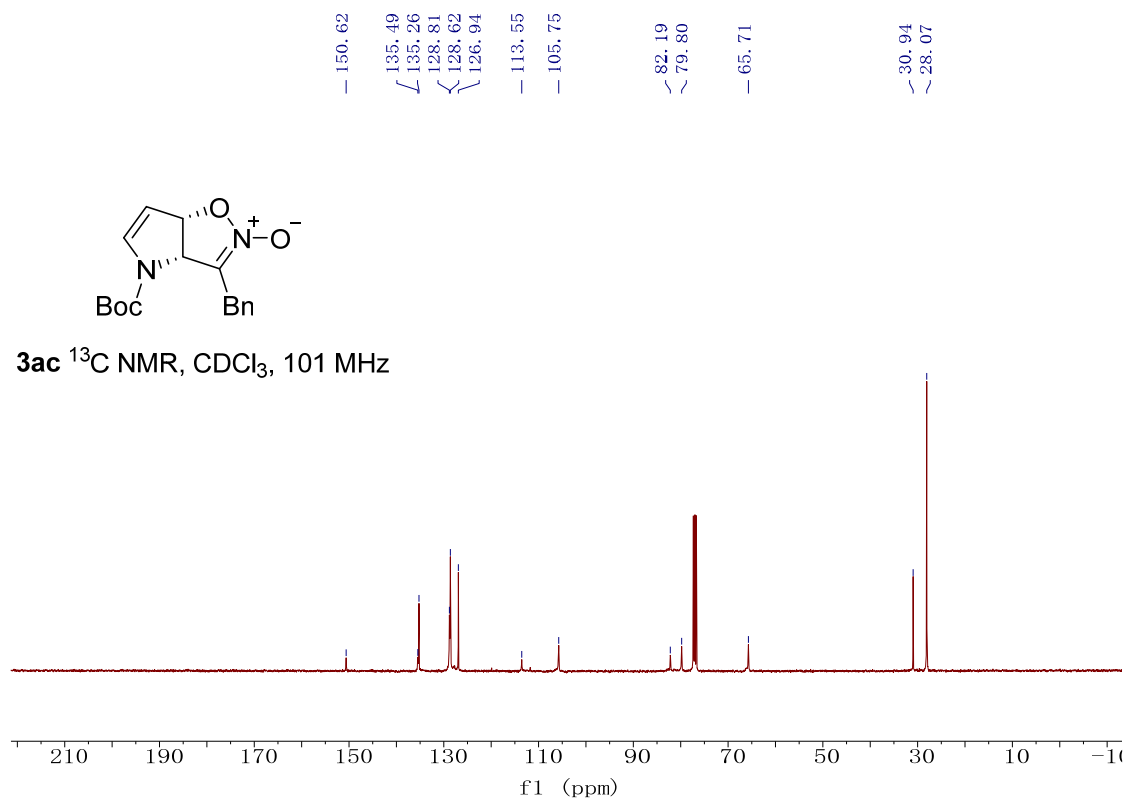

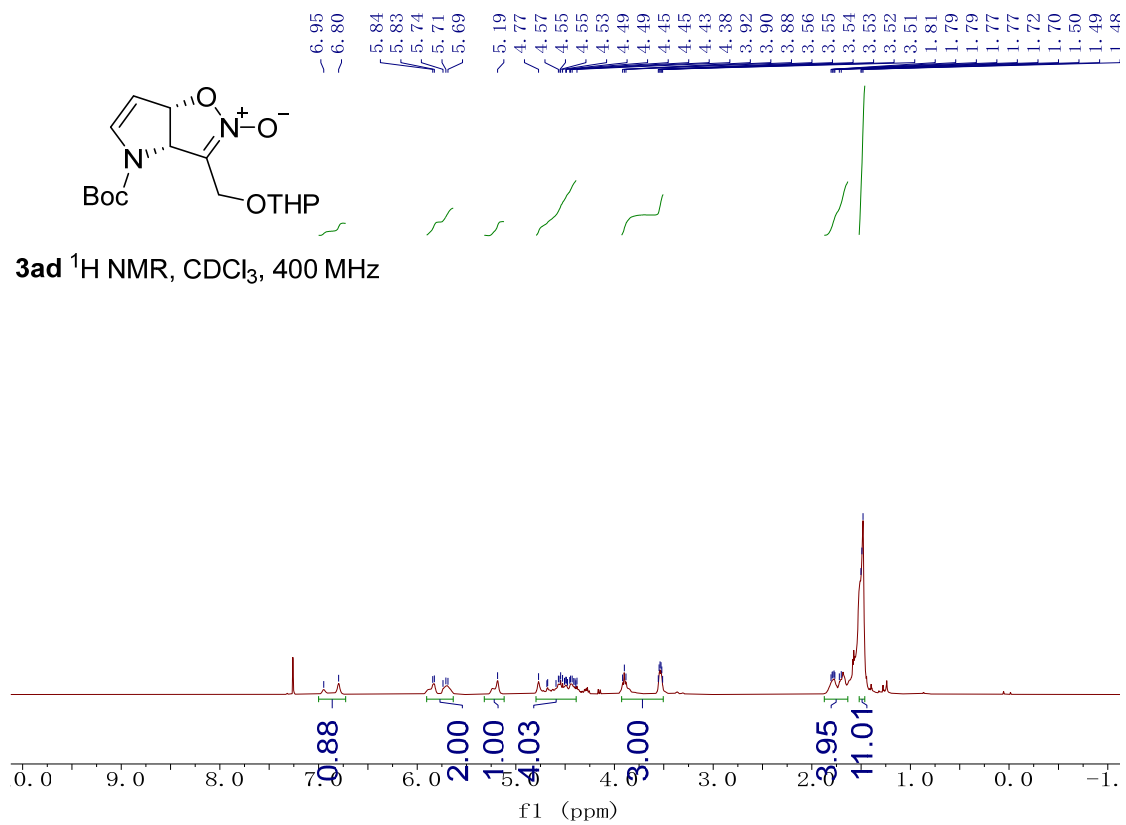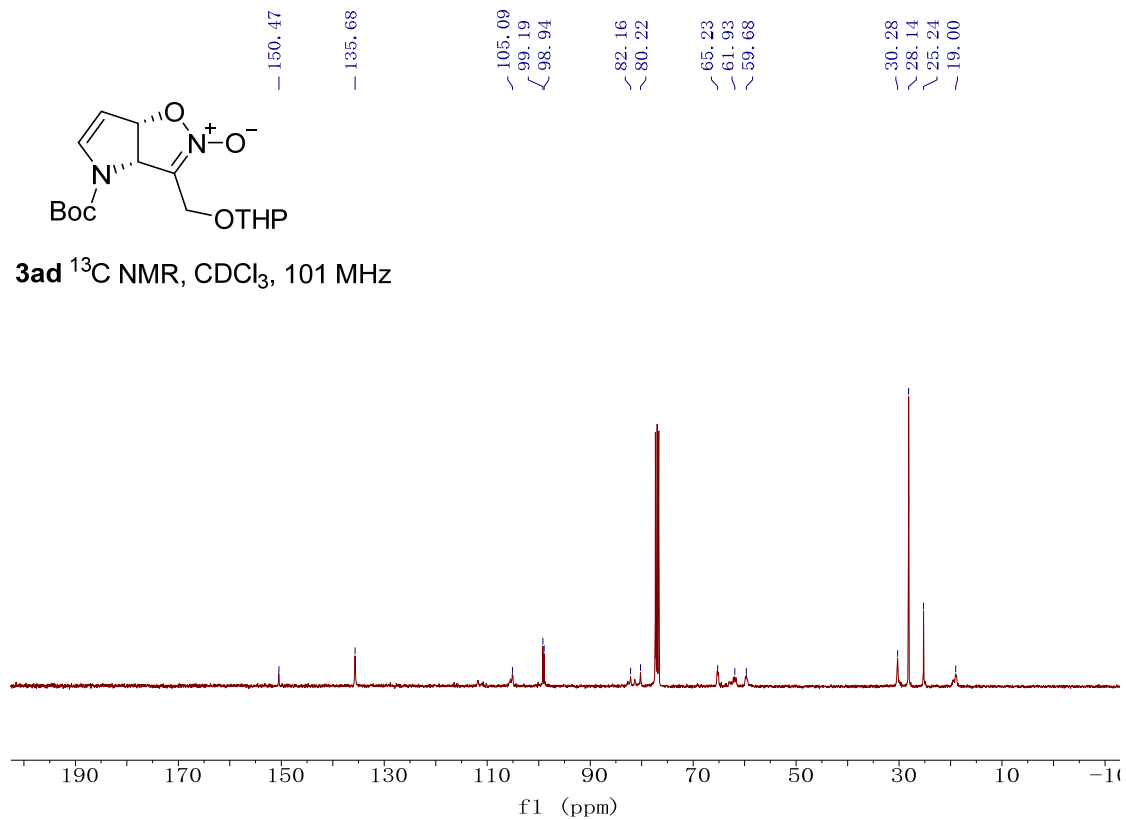

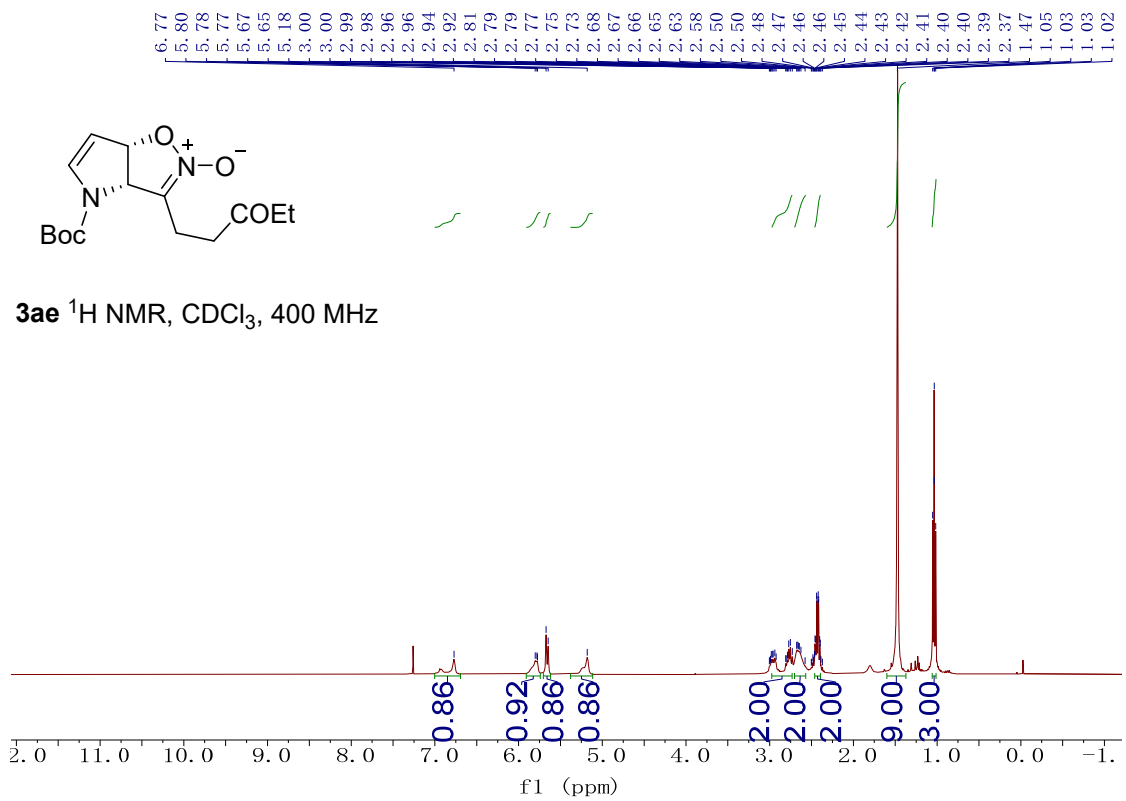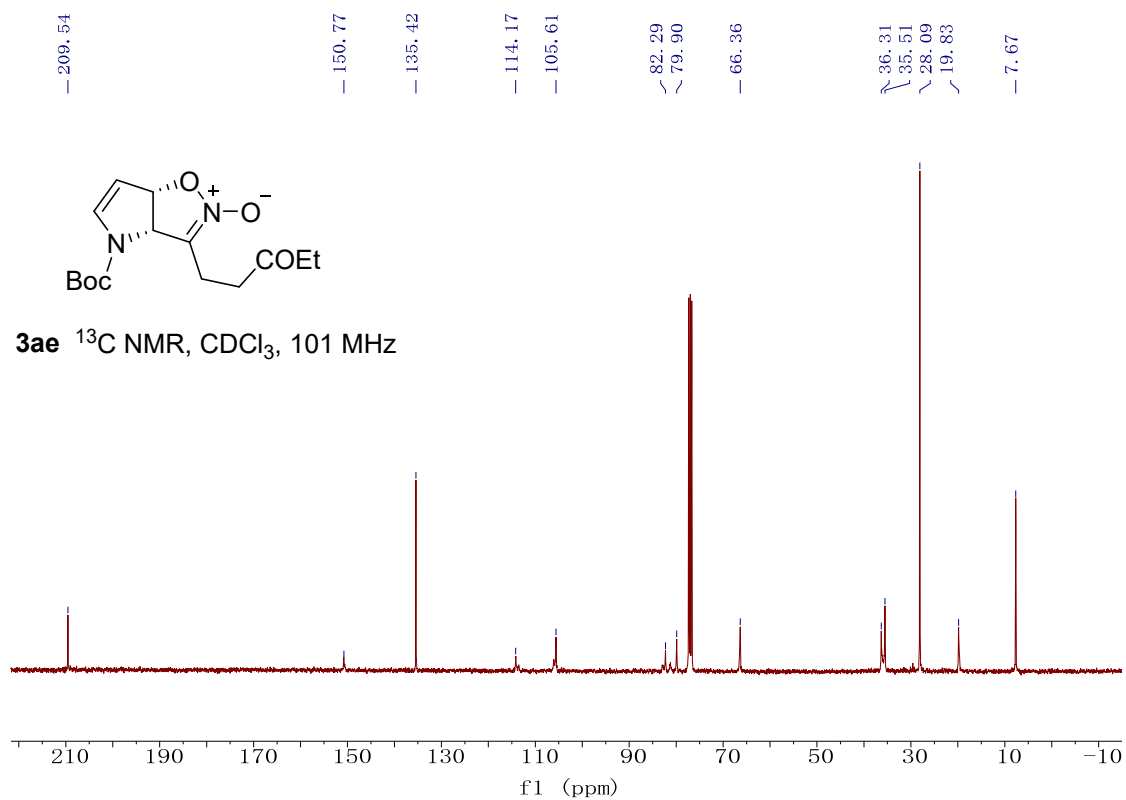

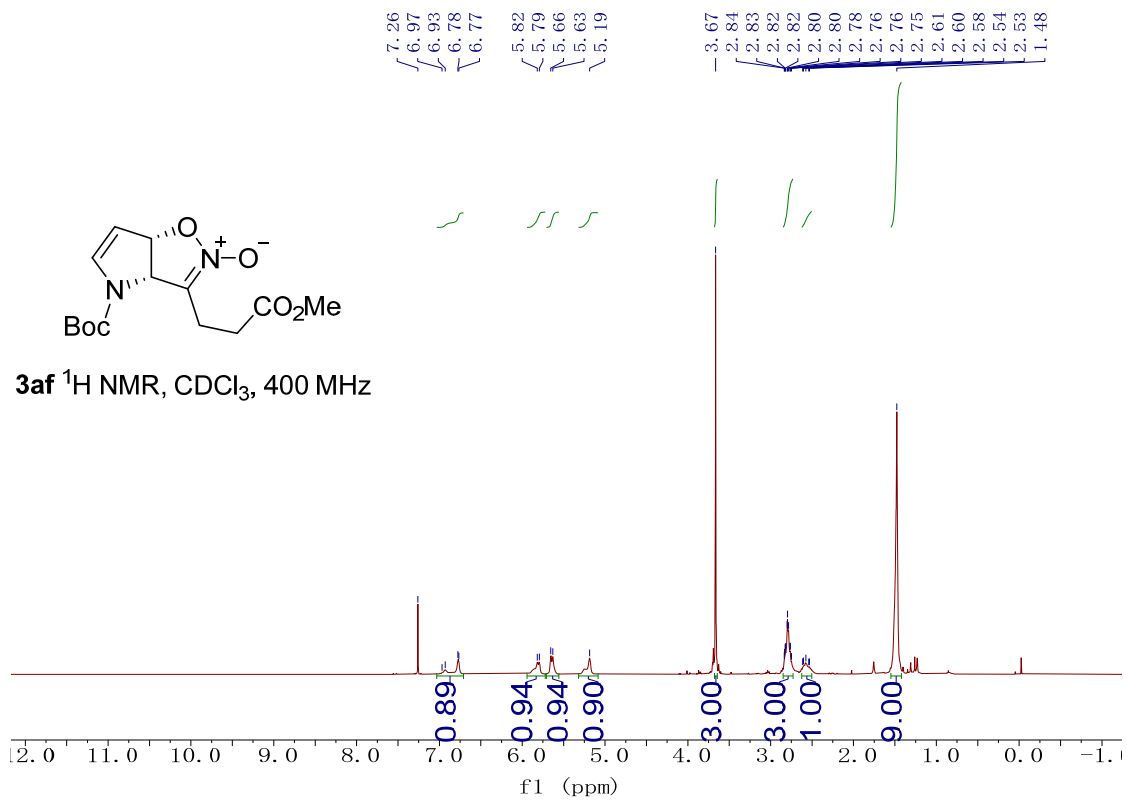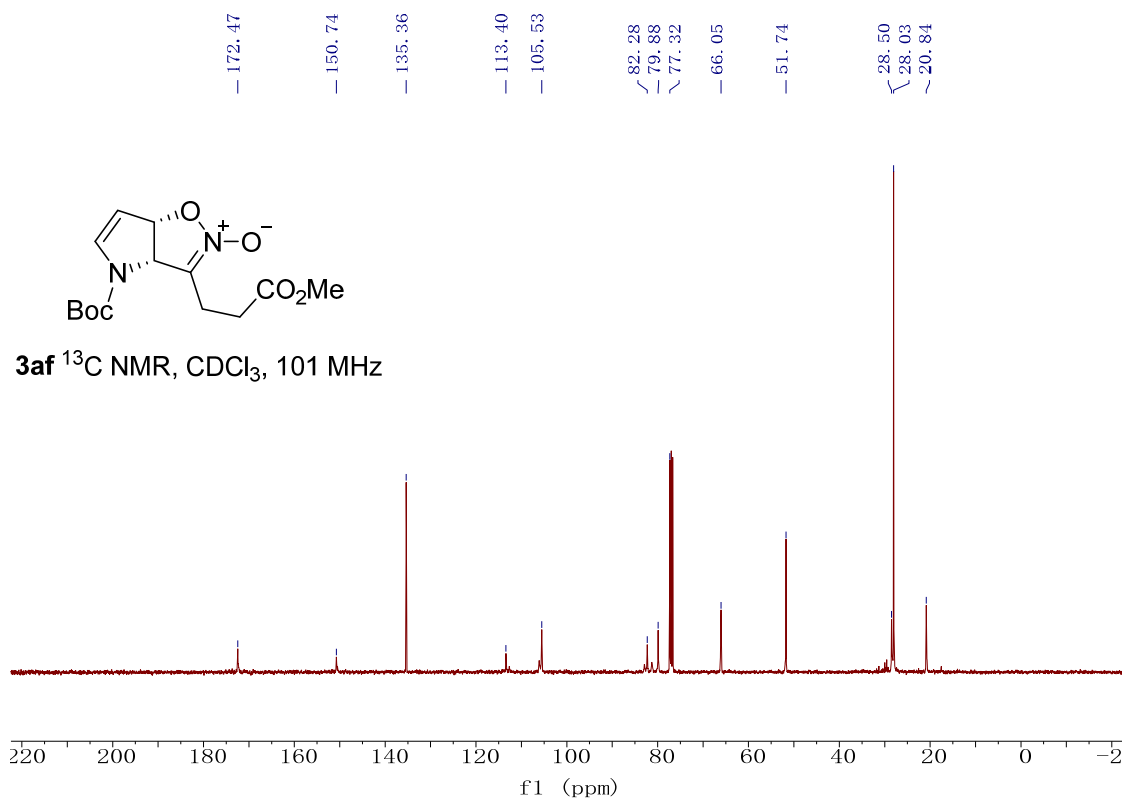

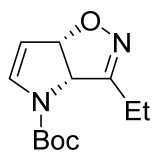

**4a**  $^1\text{H}$  NMR,  $\text{CDCl}_3$ , 400 MHz

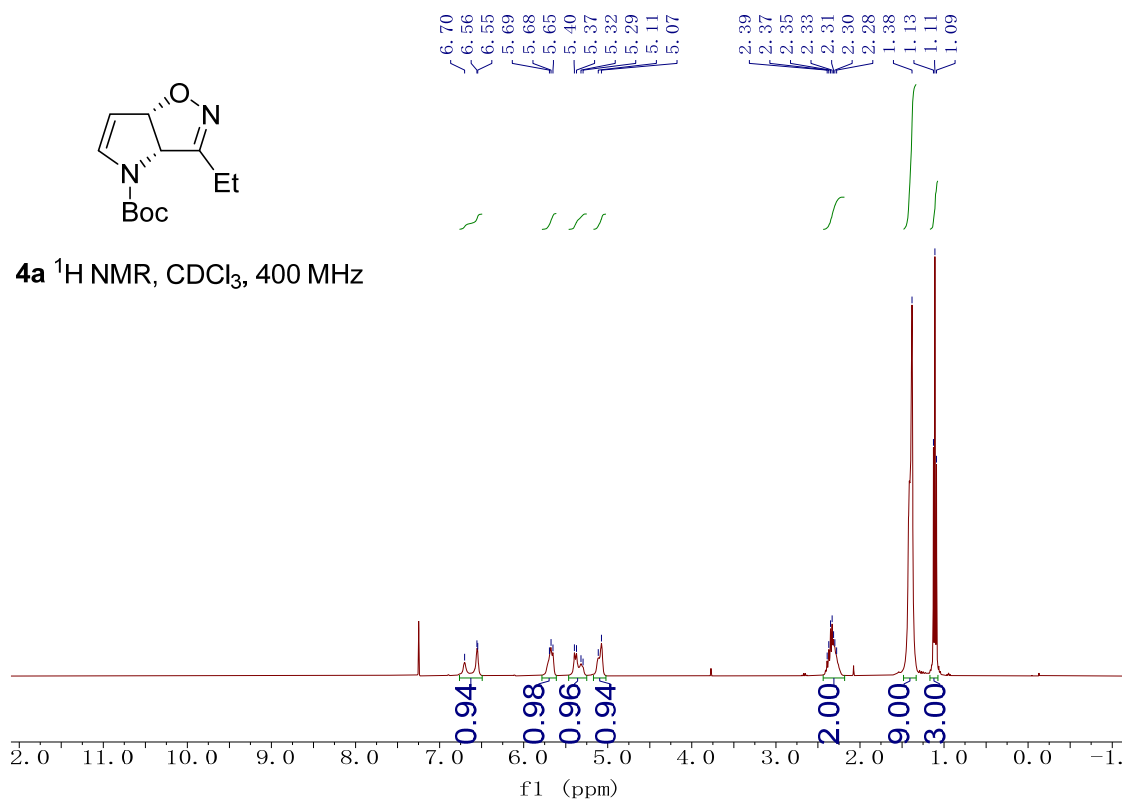

Chemical shifts (ppm): 157.41, 150.72, 132.39, 107.12, 85.24, 81.43, 69.37, 27.87, 20.25, 10.39.

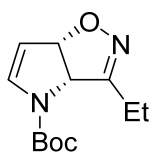

**4a**  $^{13}\text{C}$  NMR,  $\text{CDCl}_3$ , 101 MHz

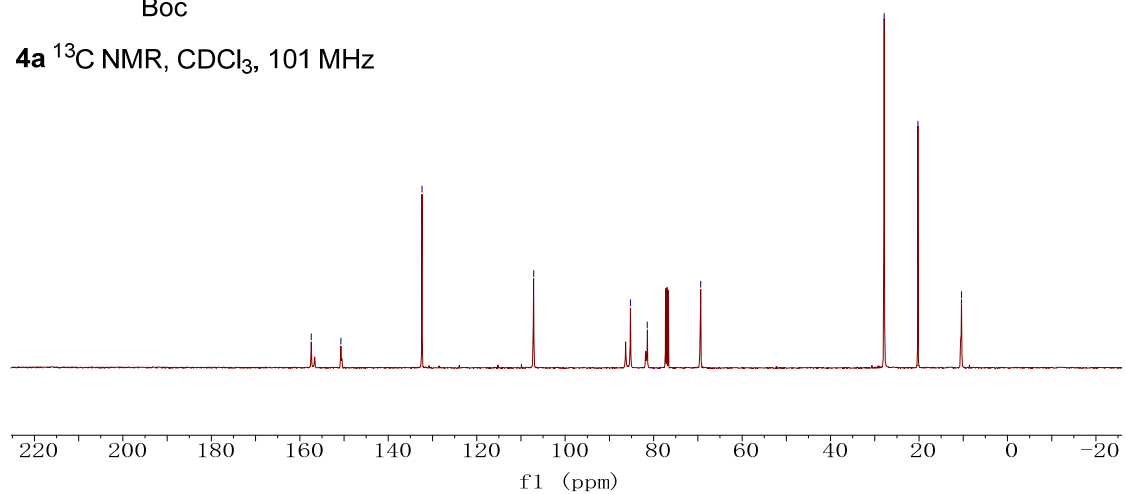

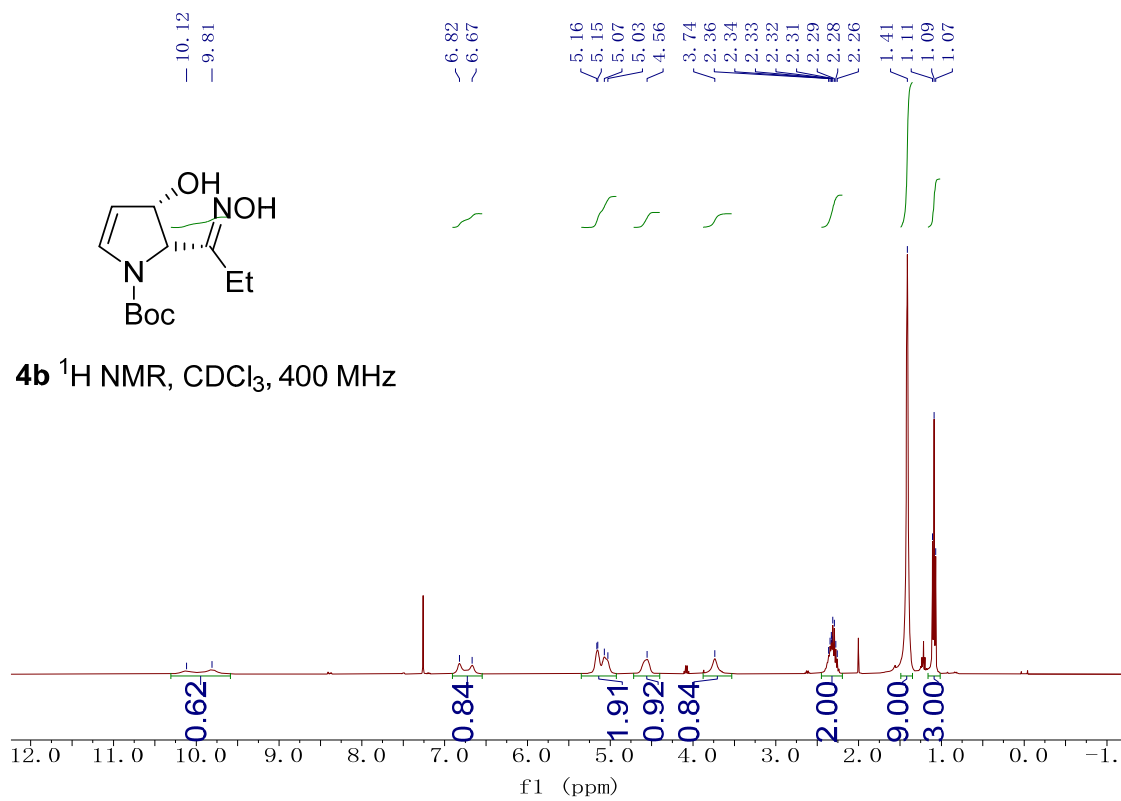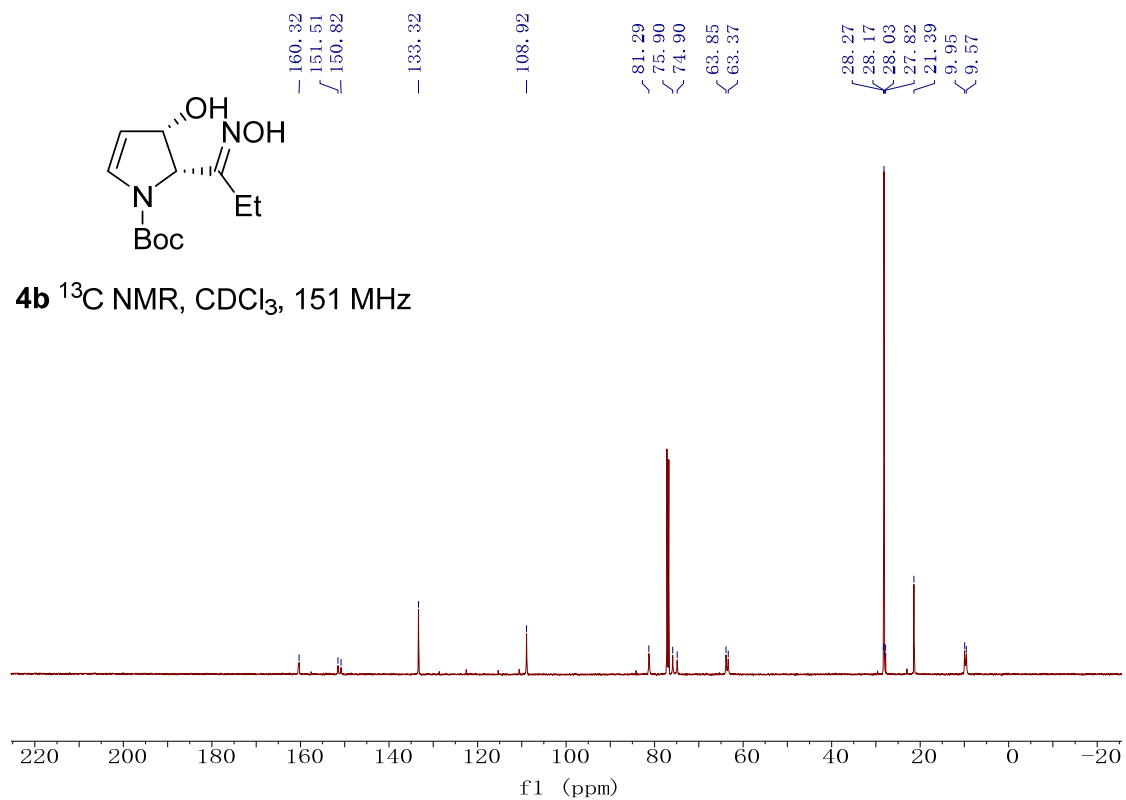

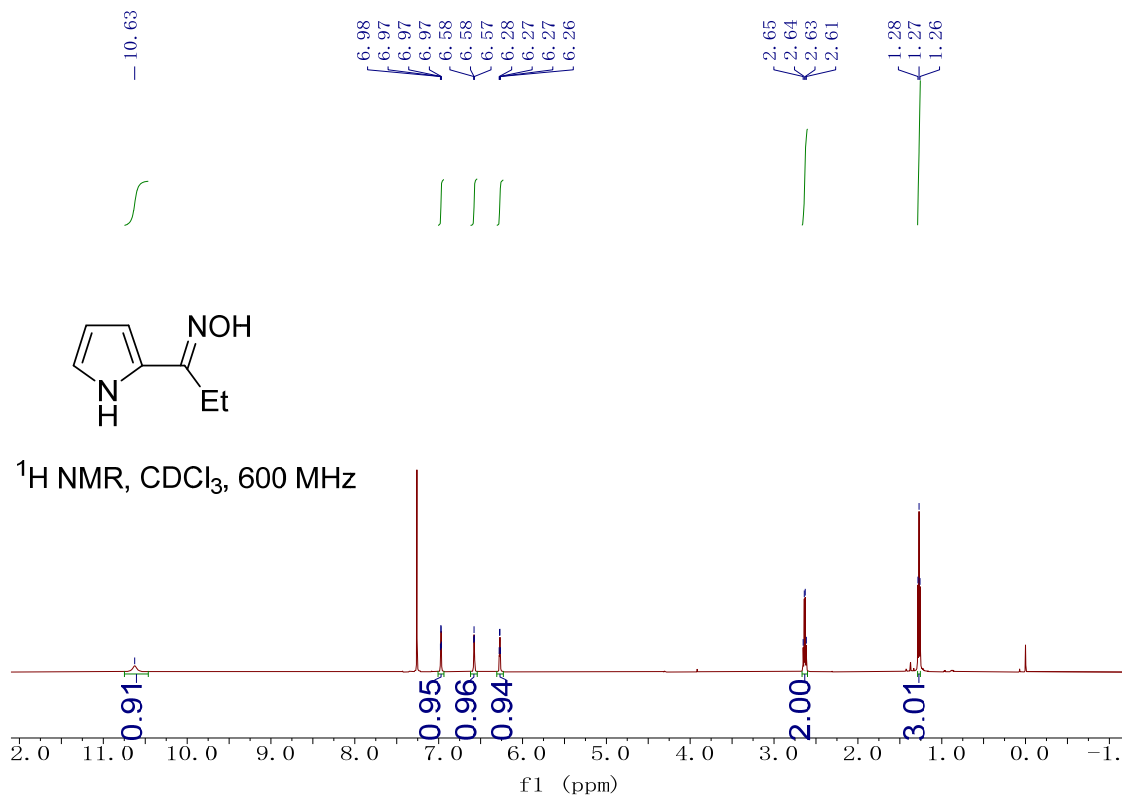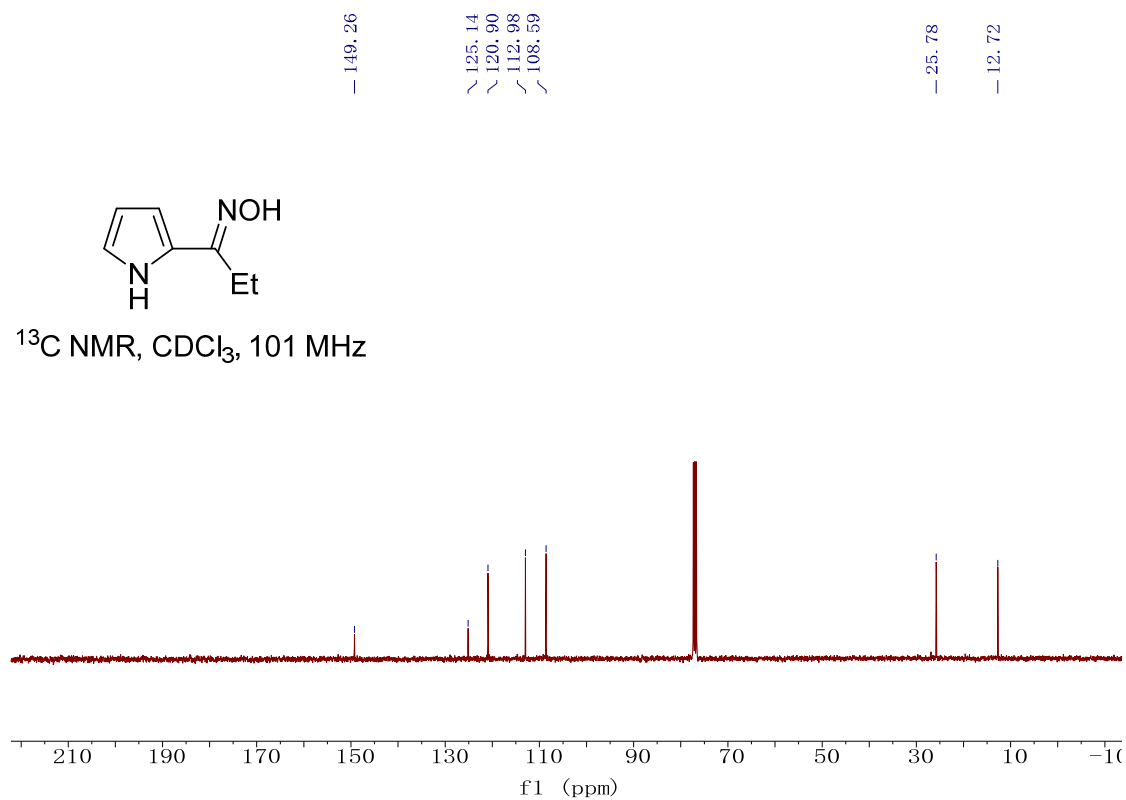



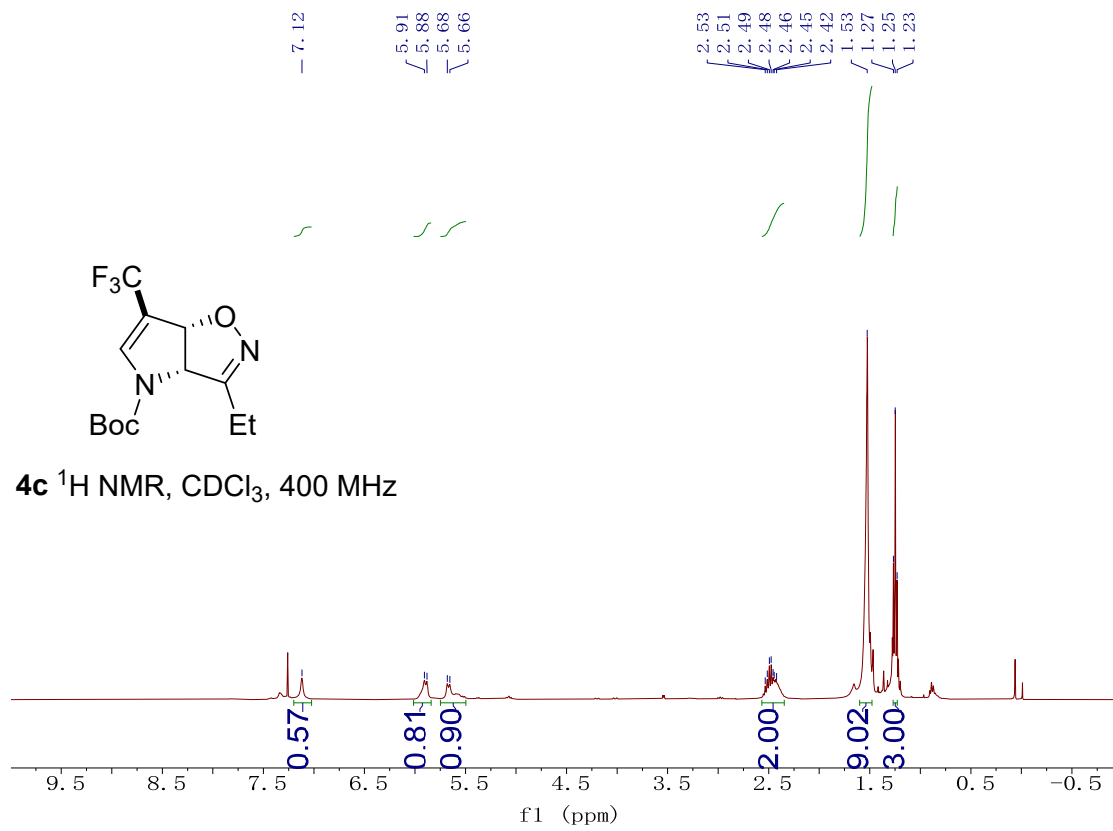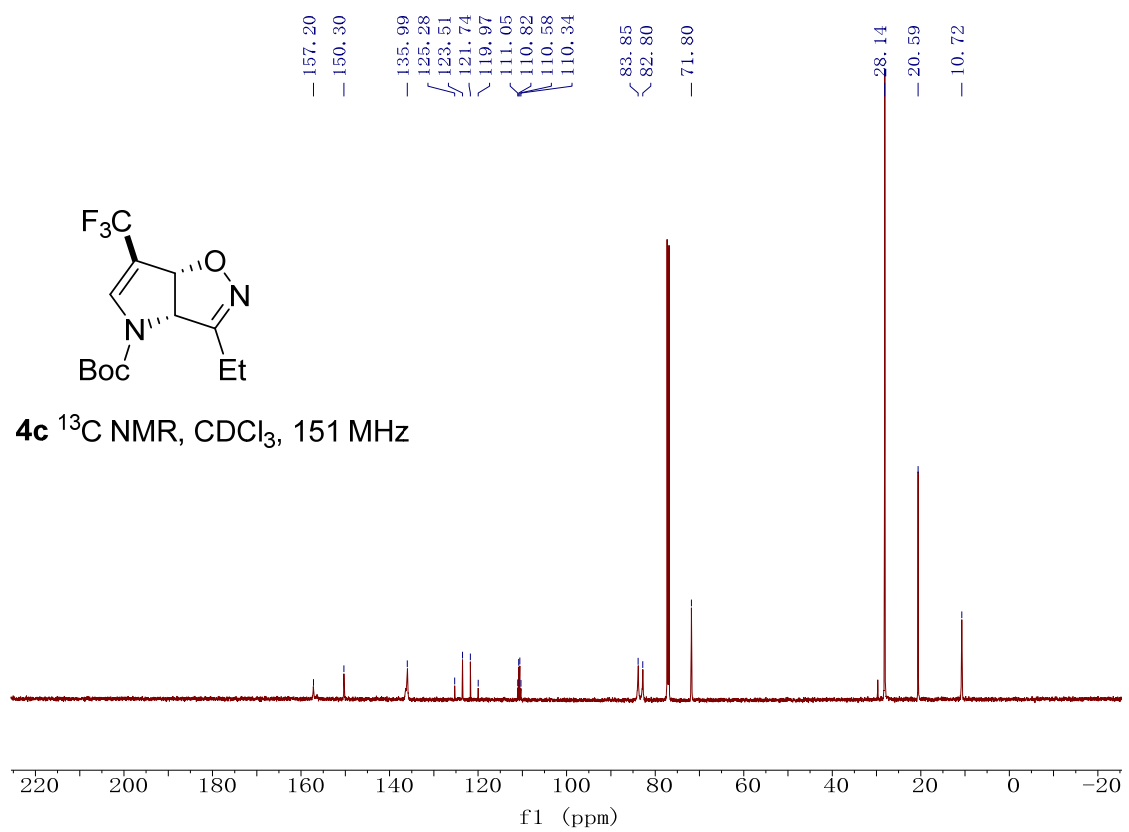

-62.46

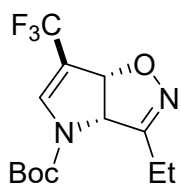

**4c** <sup>19</sup>F NMR, CDCl<sub>3</sub>, 565 MHz

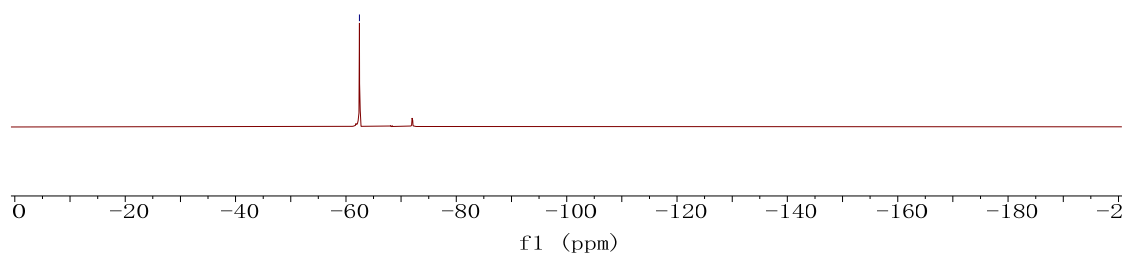

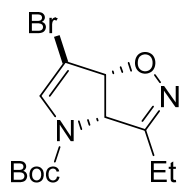

**4d**  $^1\text{H}$  NMR,  $\text{CDCl}_3$ , 400 MHz

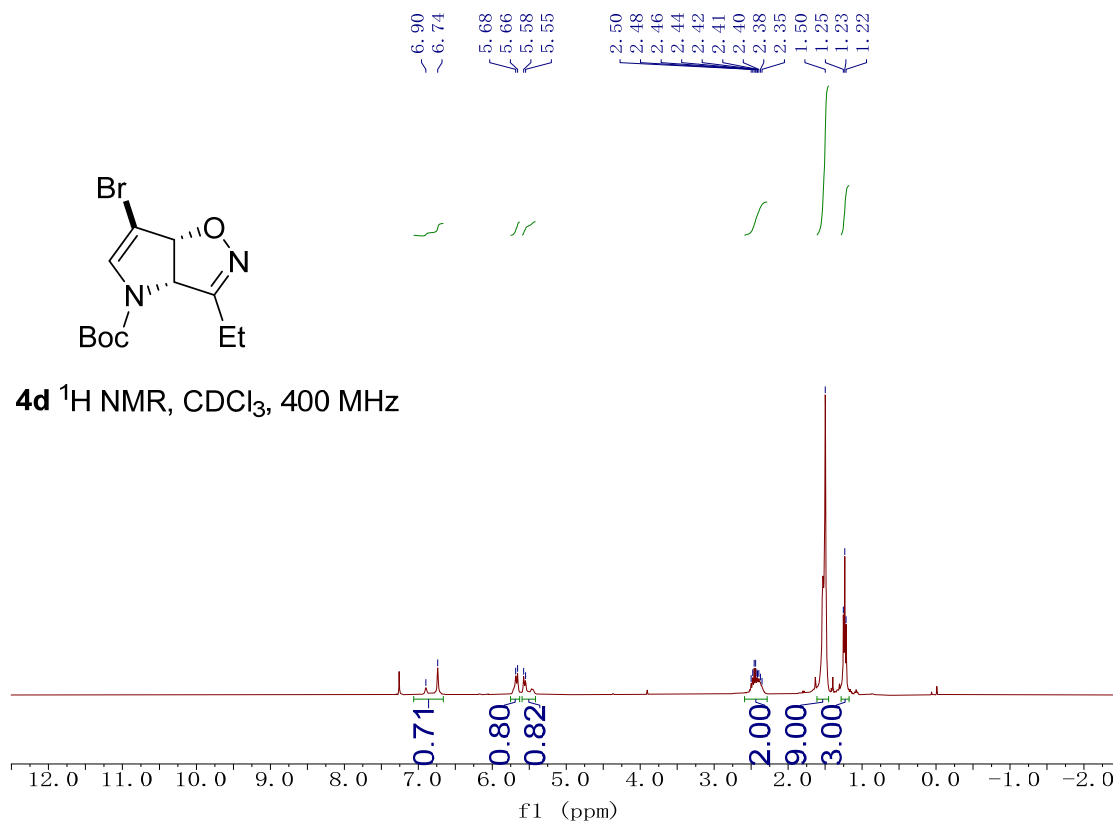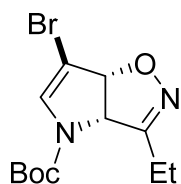

**4d**  $^{13}\text{C}$  NMR,  $\text{CDCl}_3$ , 101 MHz

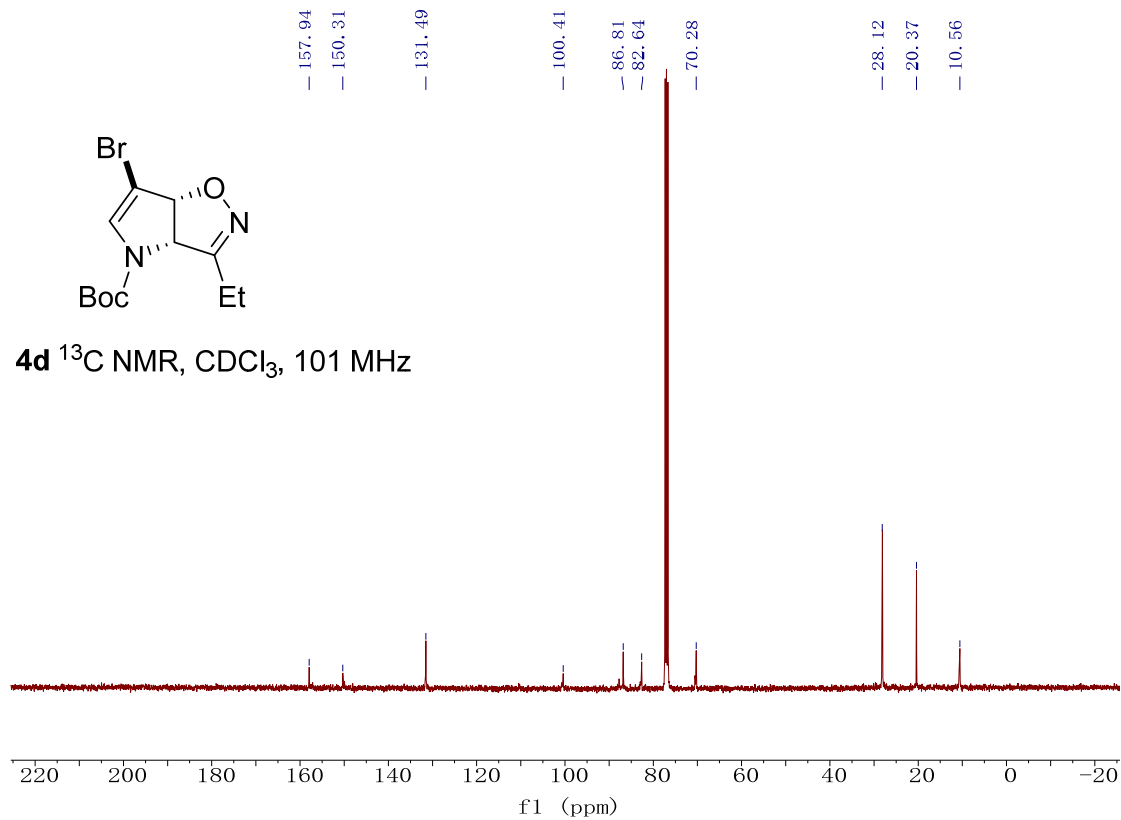

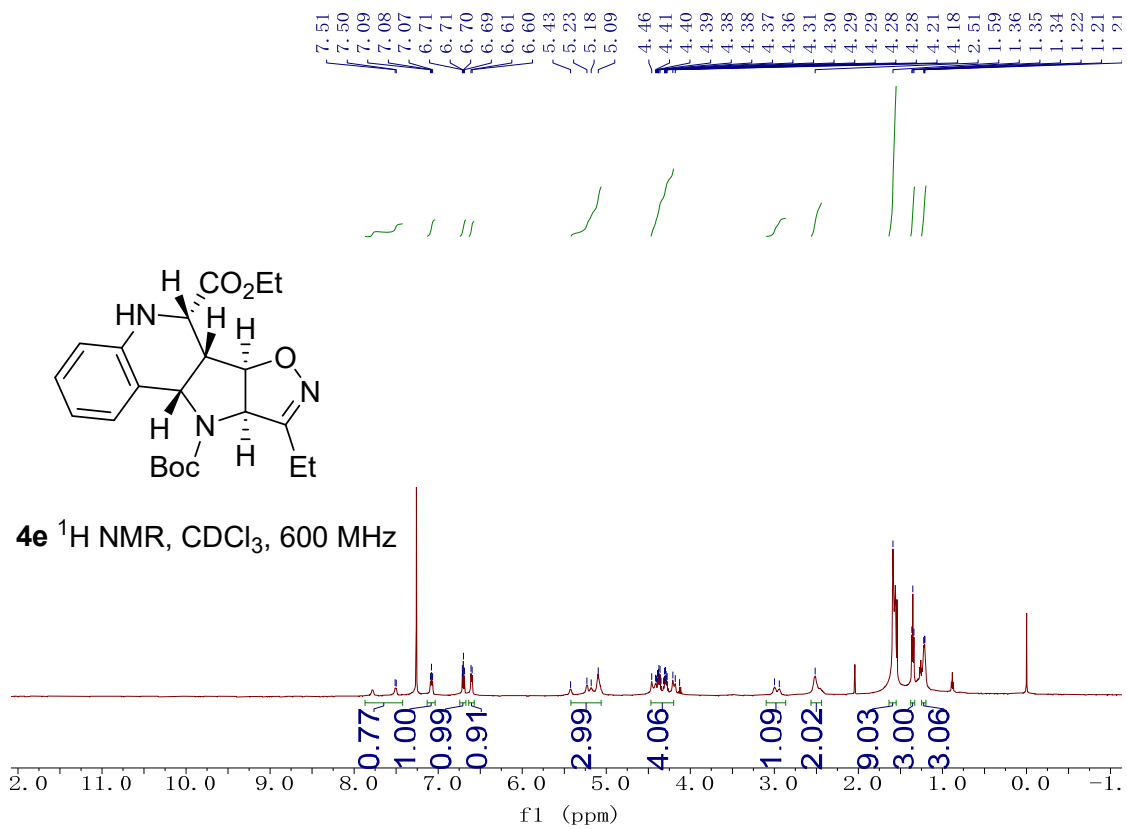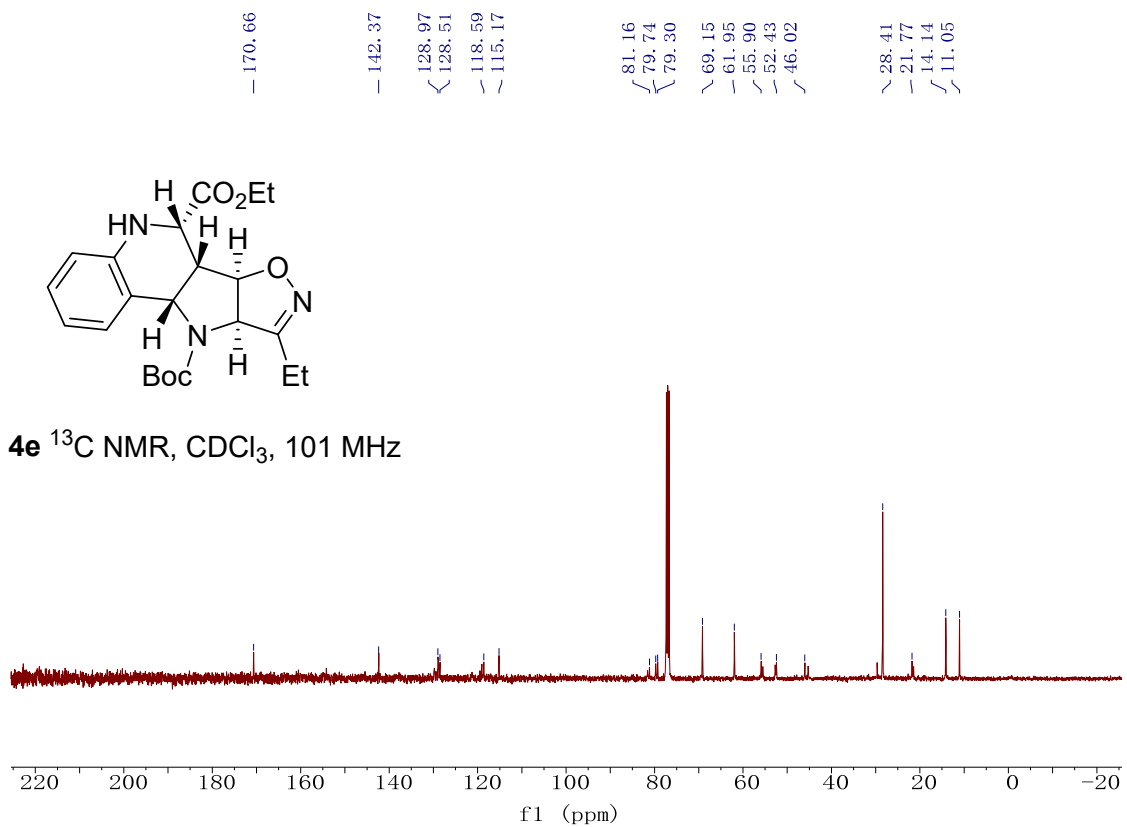

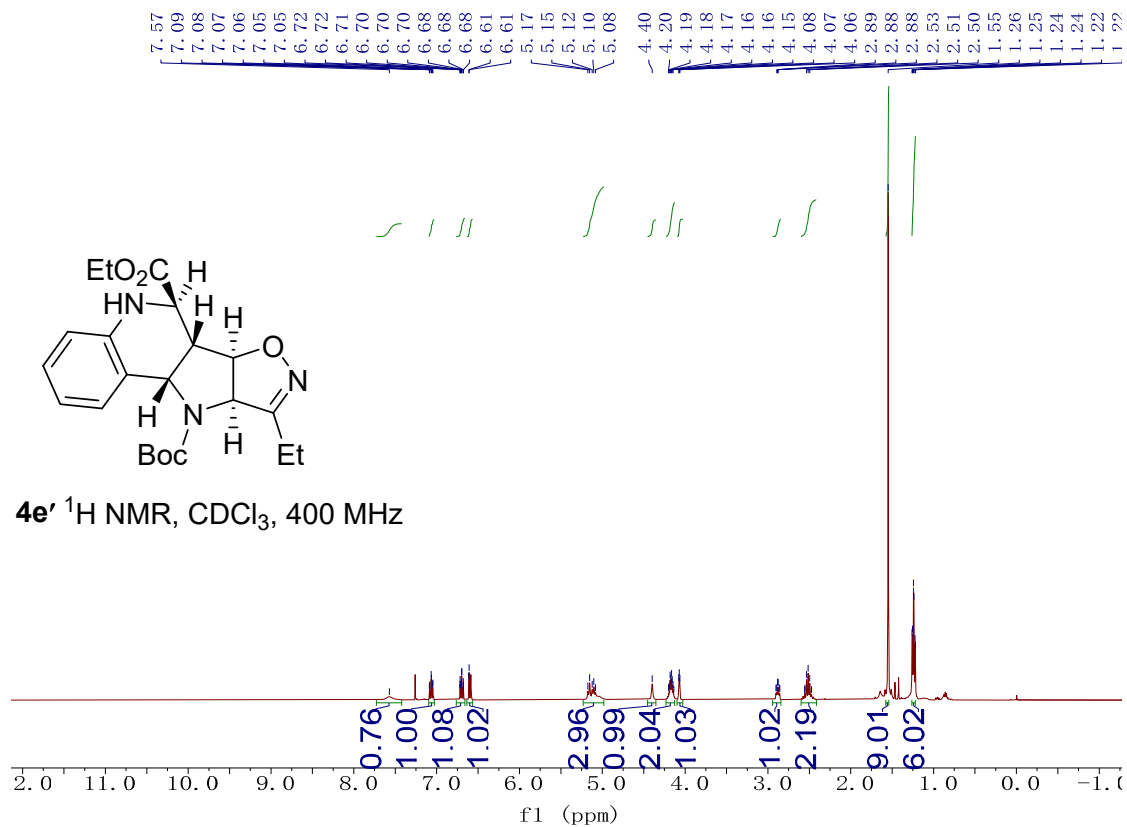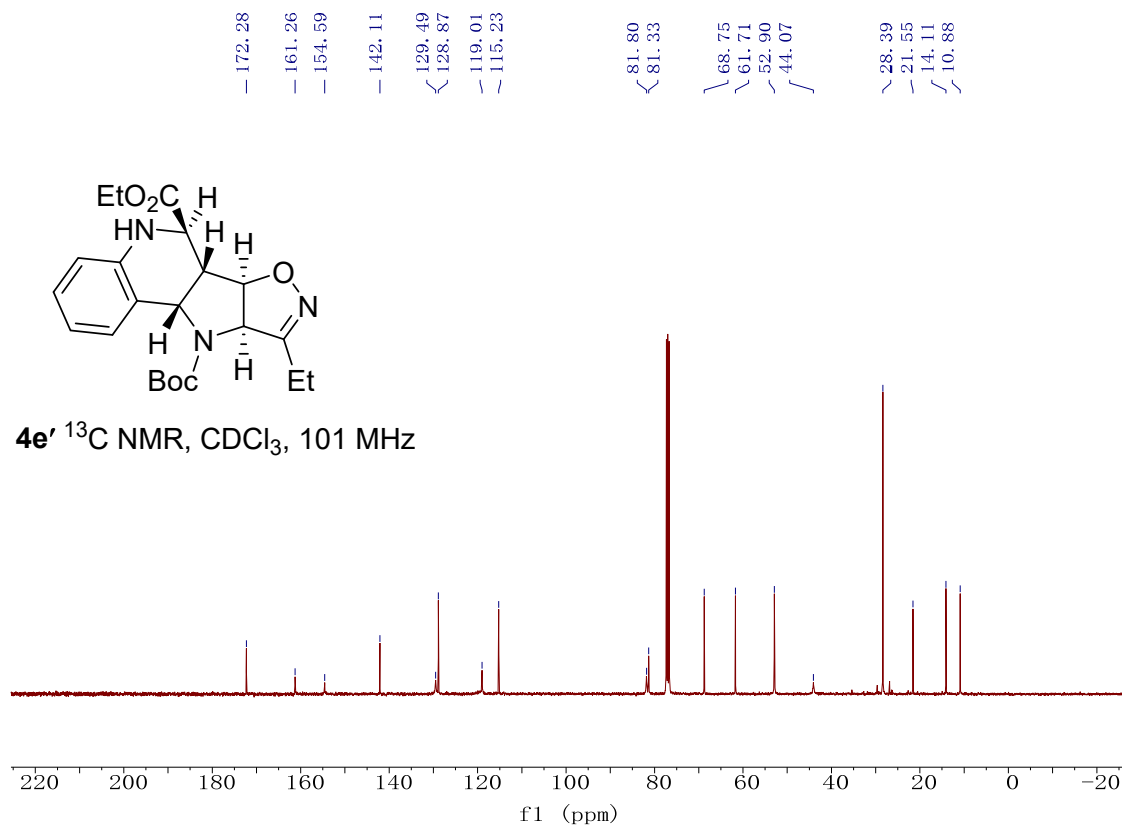

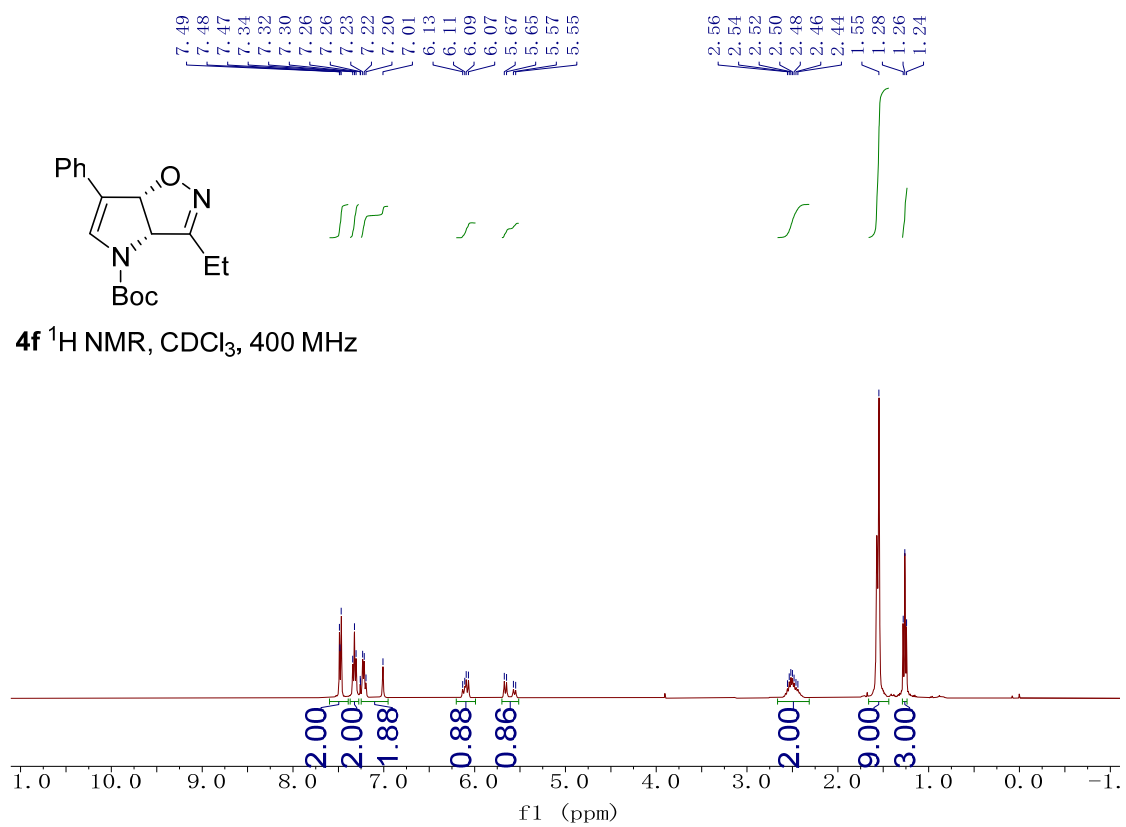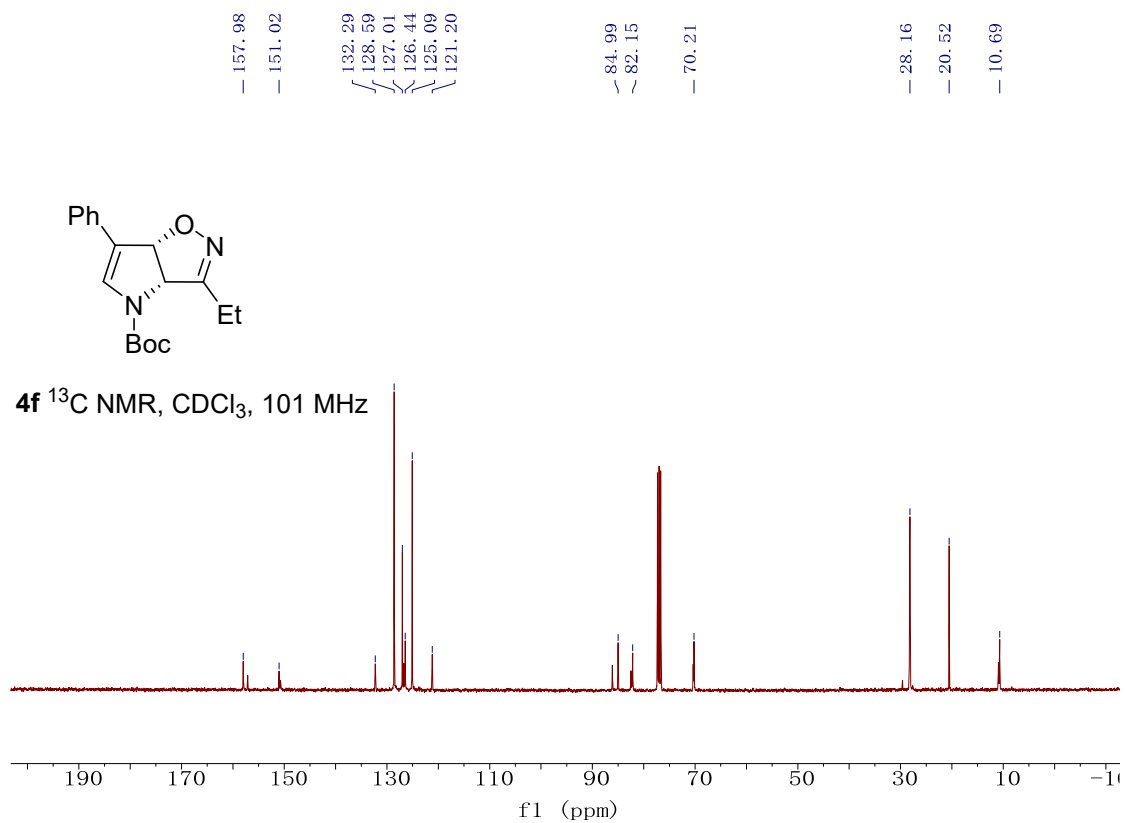

Supplement: d4cc01437e1.pdf [file d4cc01437e1.pdf]
